# Supplementary material for: Mitochondrial protein import clogging as a mechanism of disease
Source: eLife journal article supplement (doi:10.7554/elife.84330), 2023-05-02
Supplement: fig1-data1 [file elife-84330-fig1-data1-v2.zip]

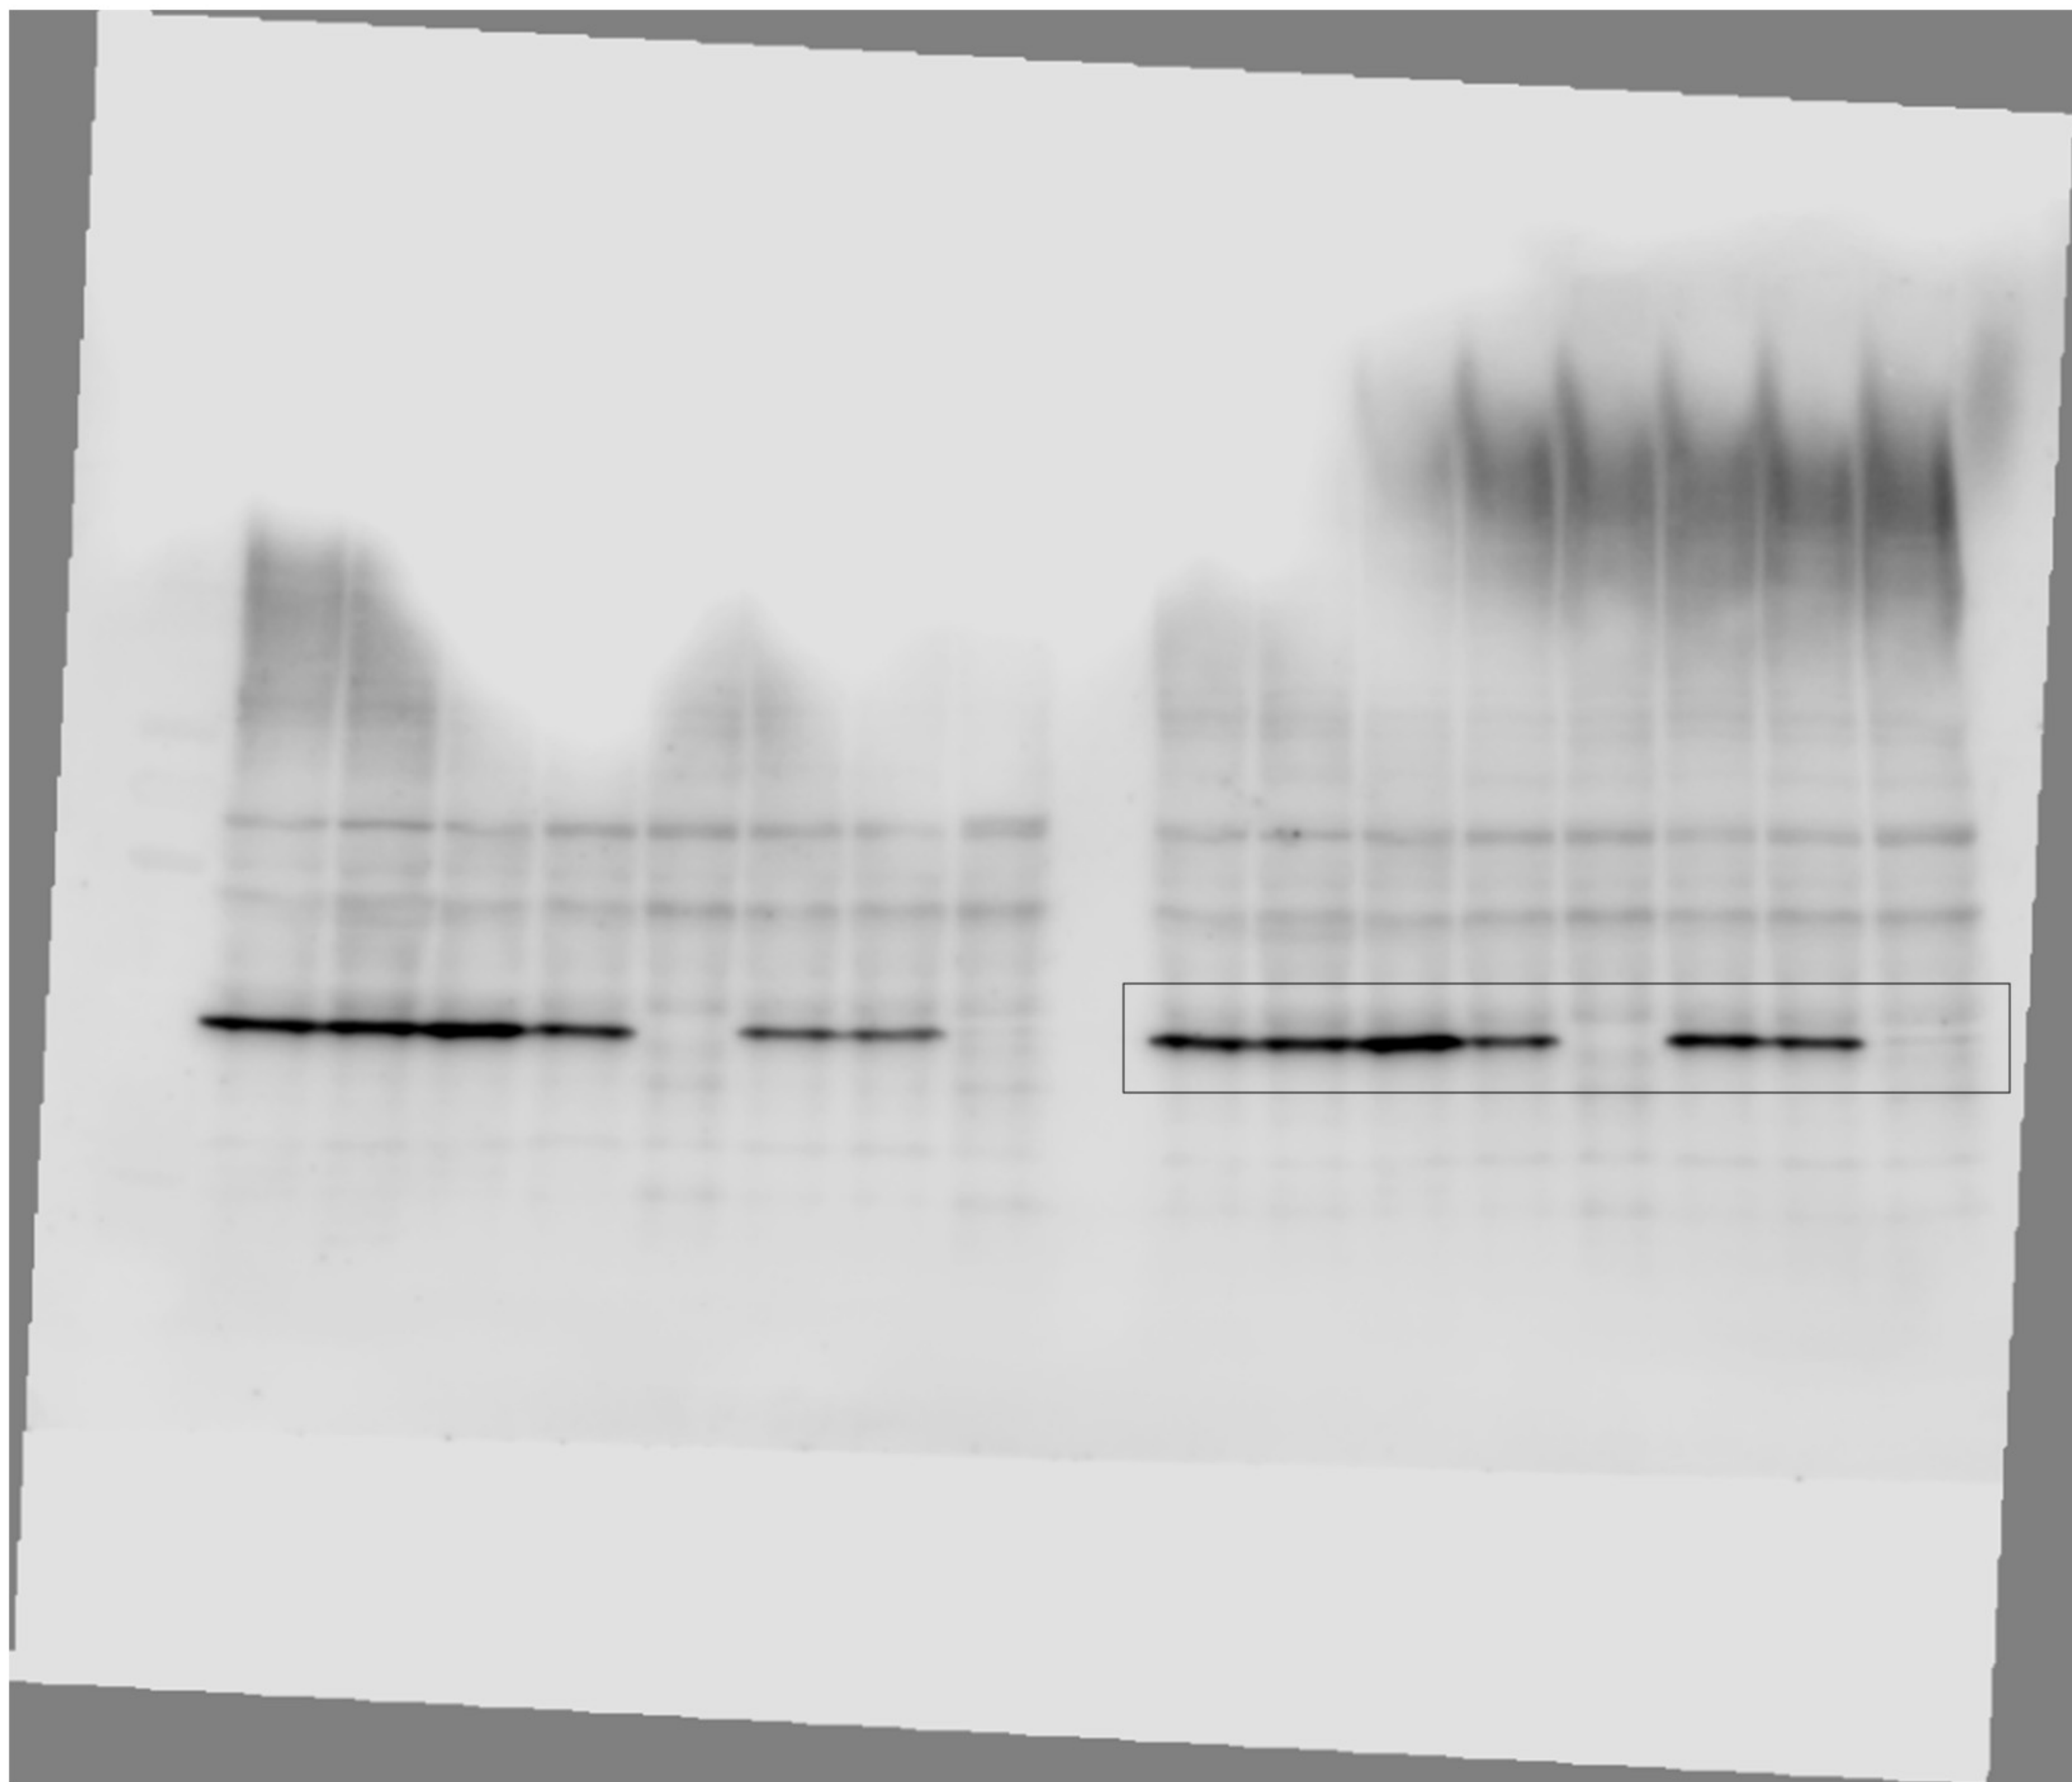

Cropped area for Figure 1E  
Aac2 short

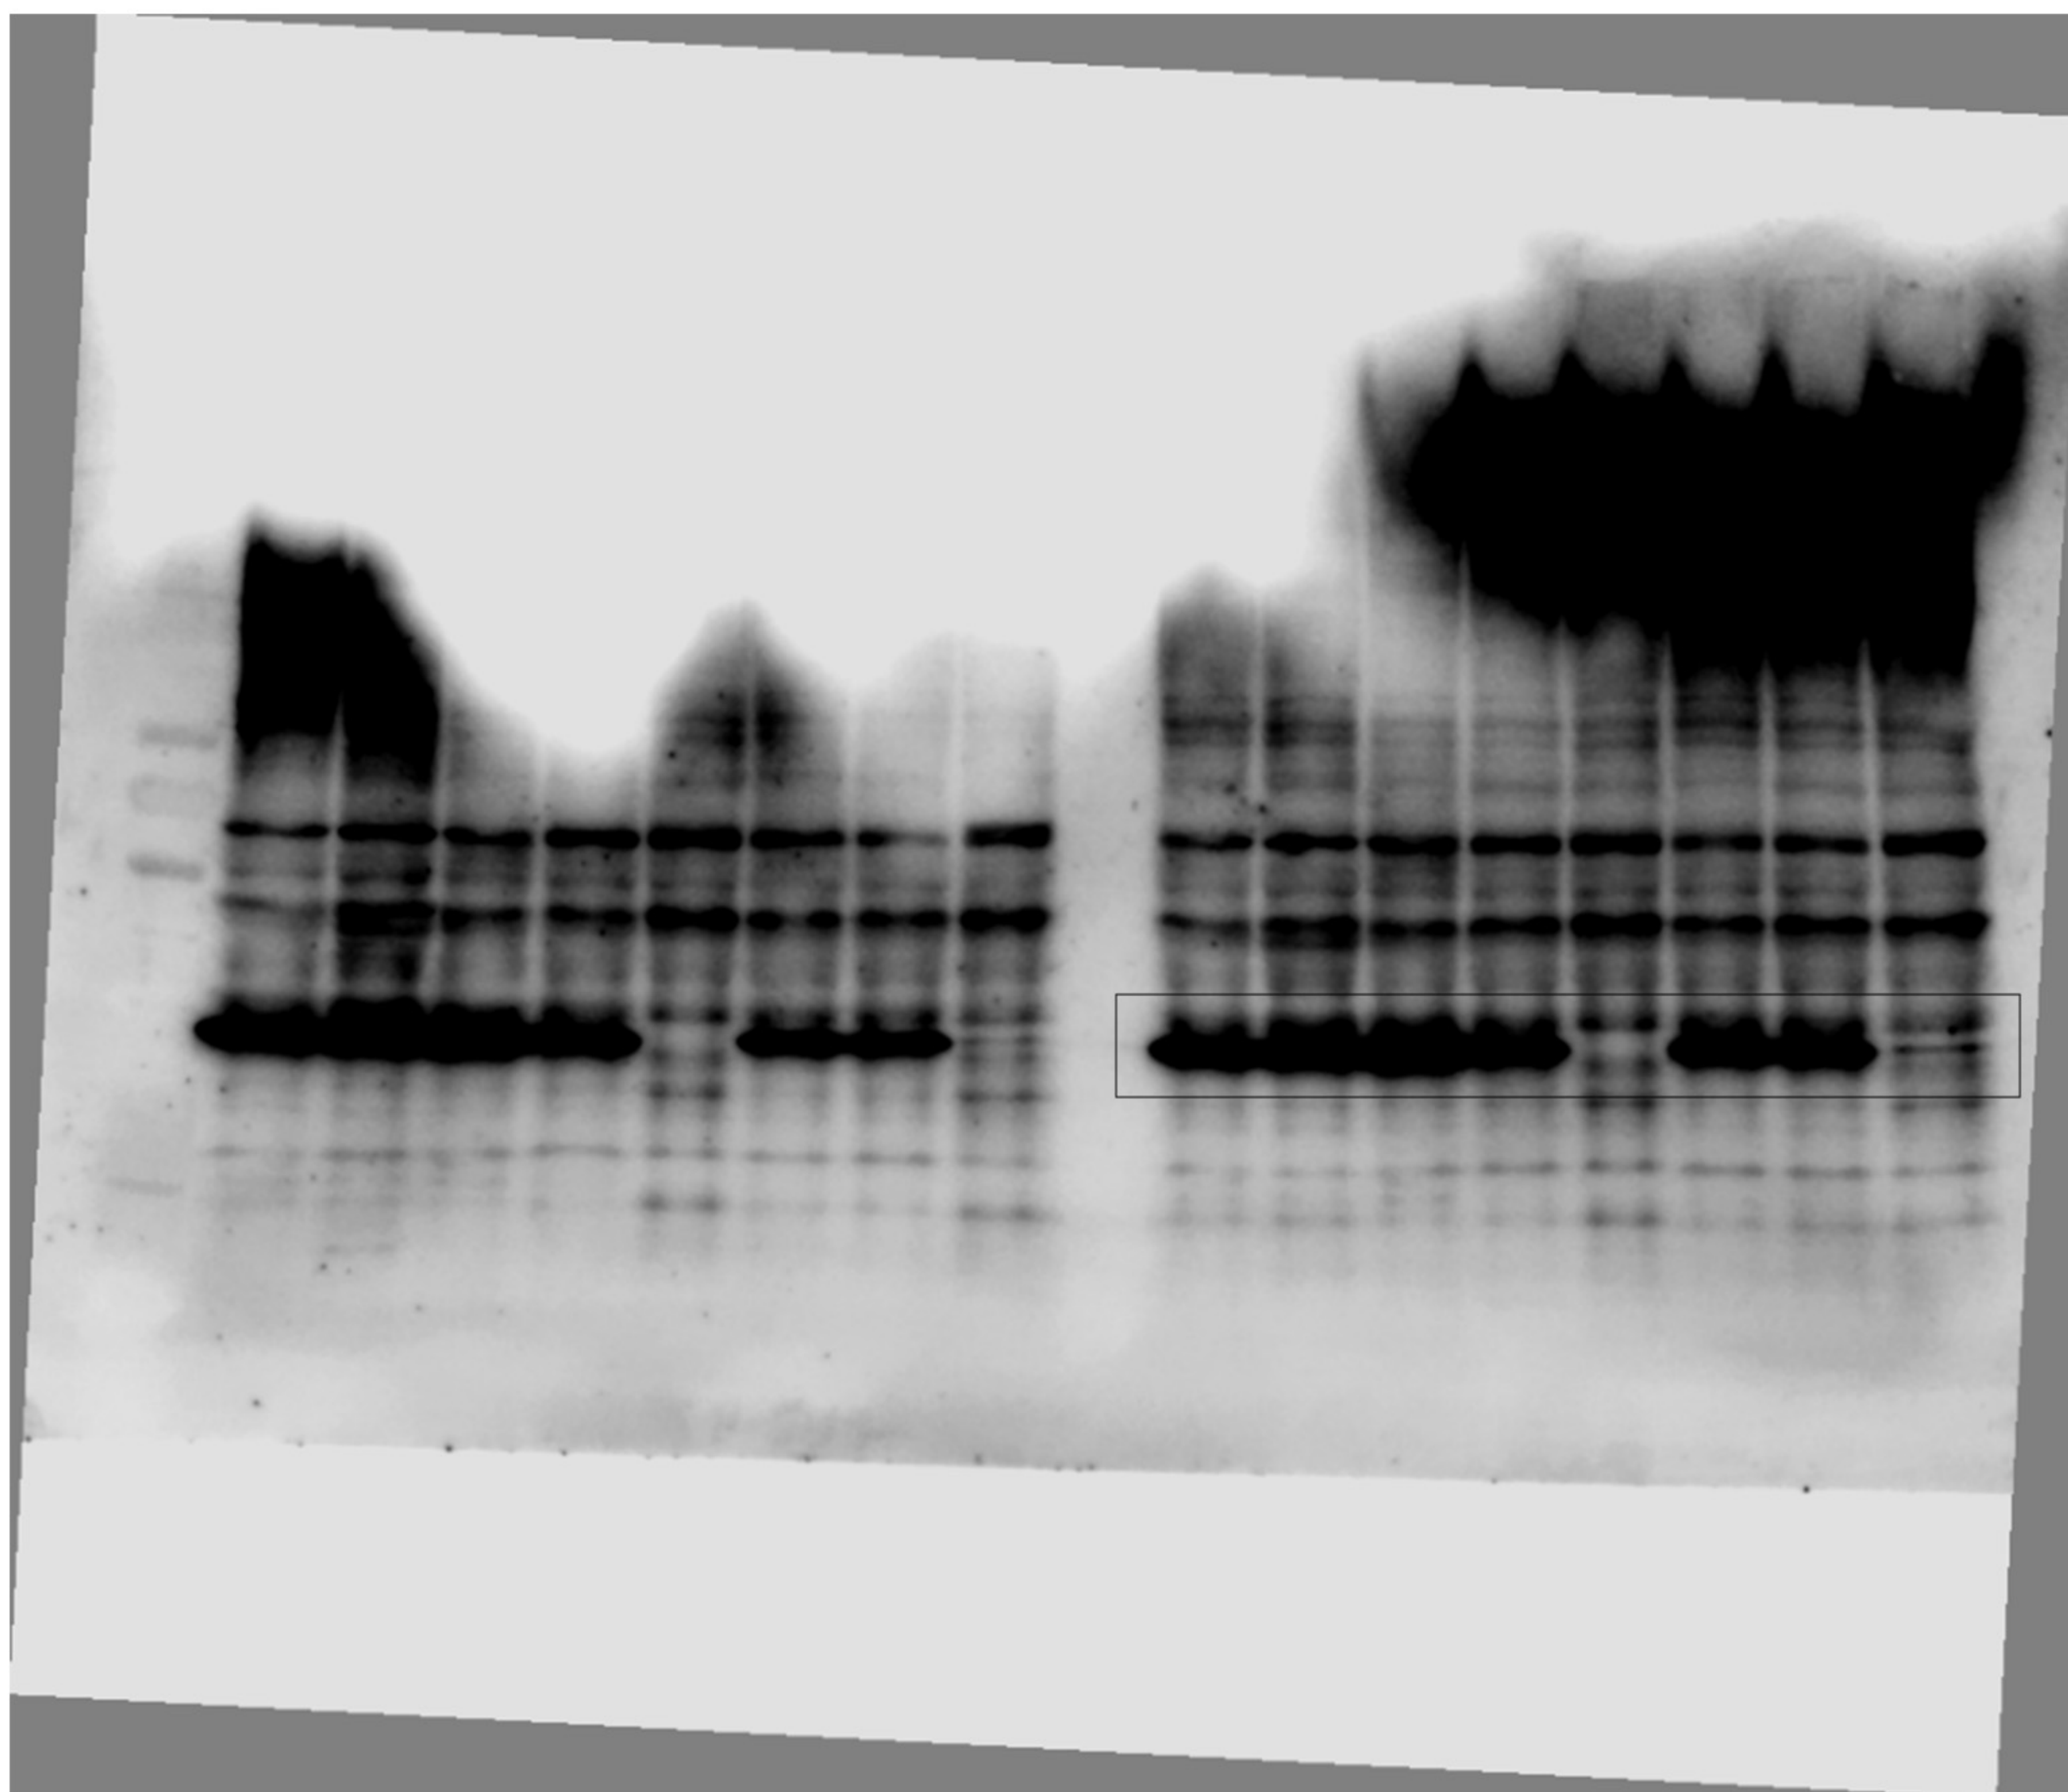

Cropped area for Figure 1E  
Aac2 Long

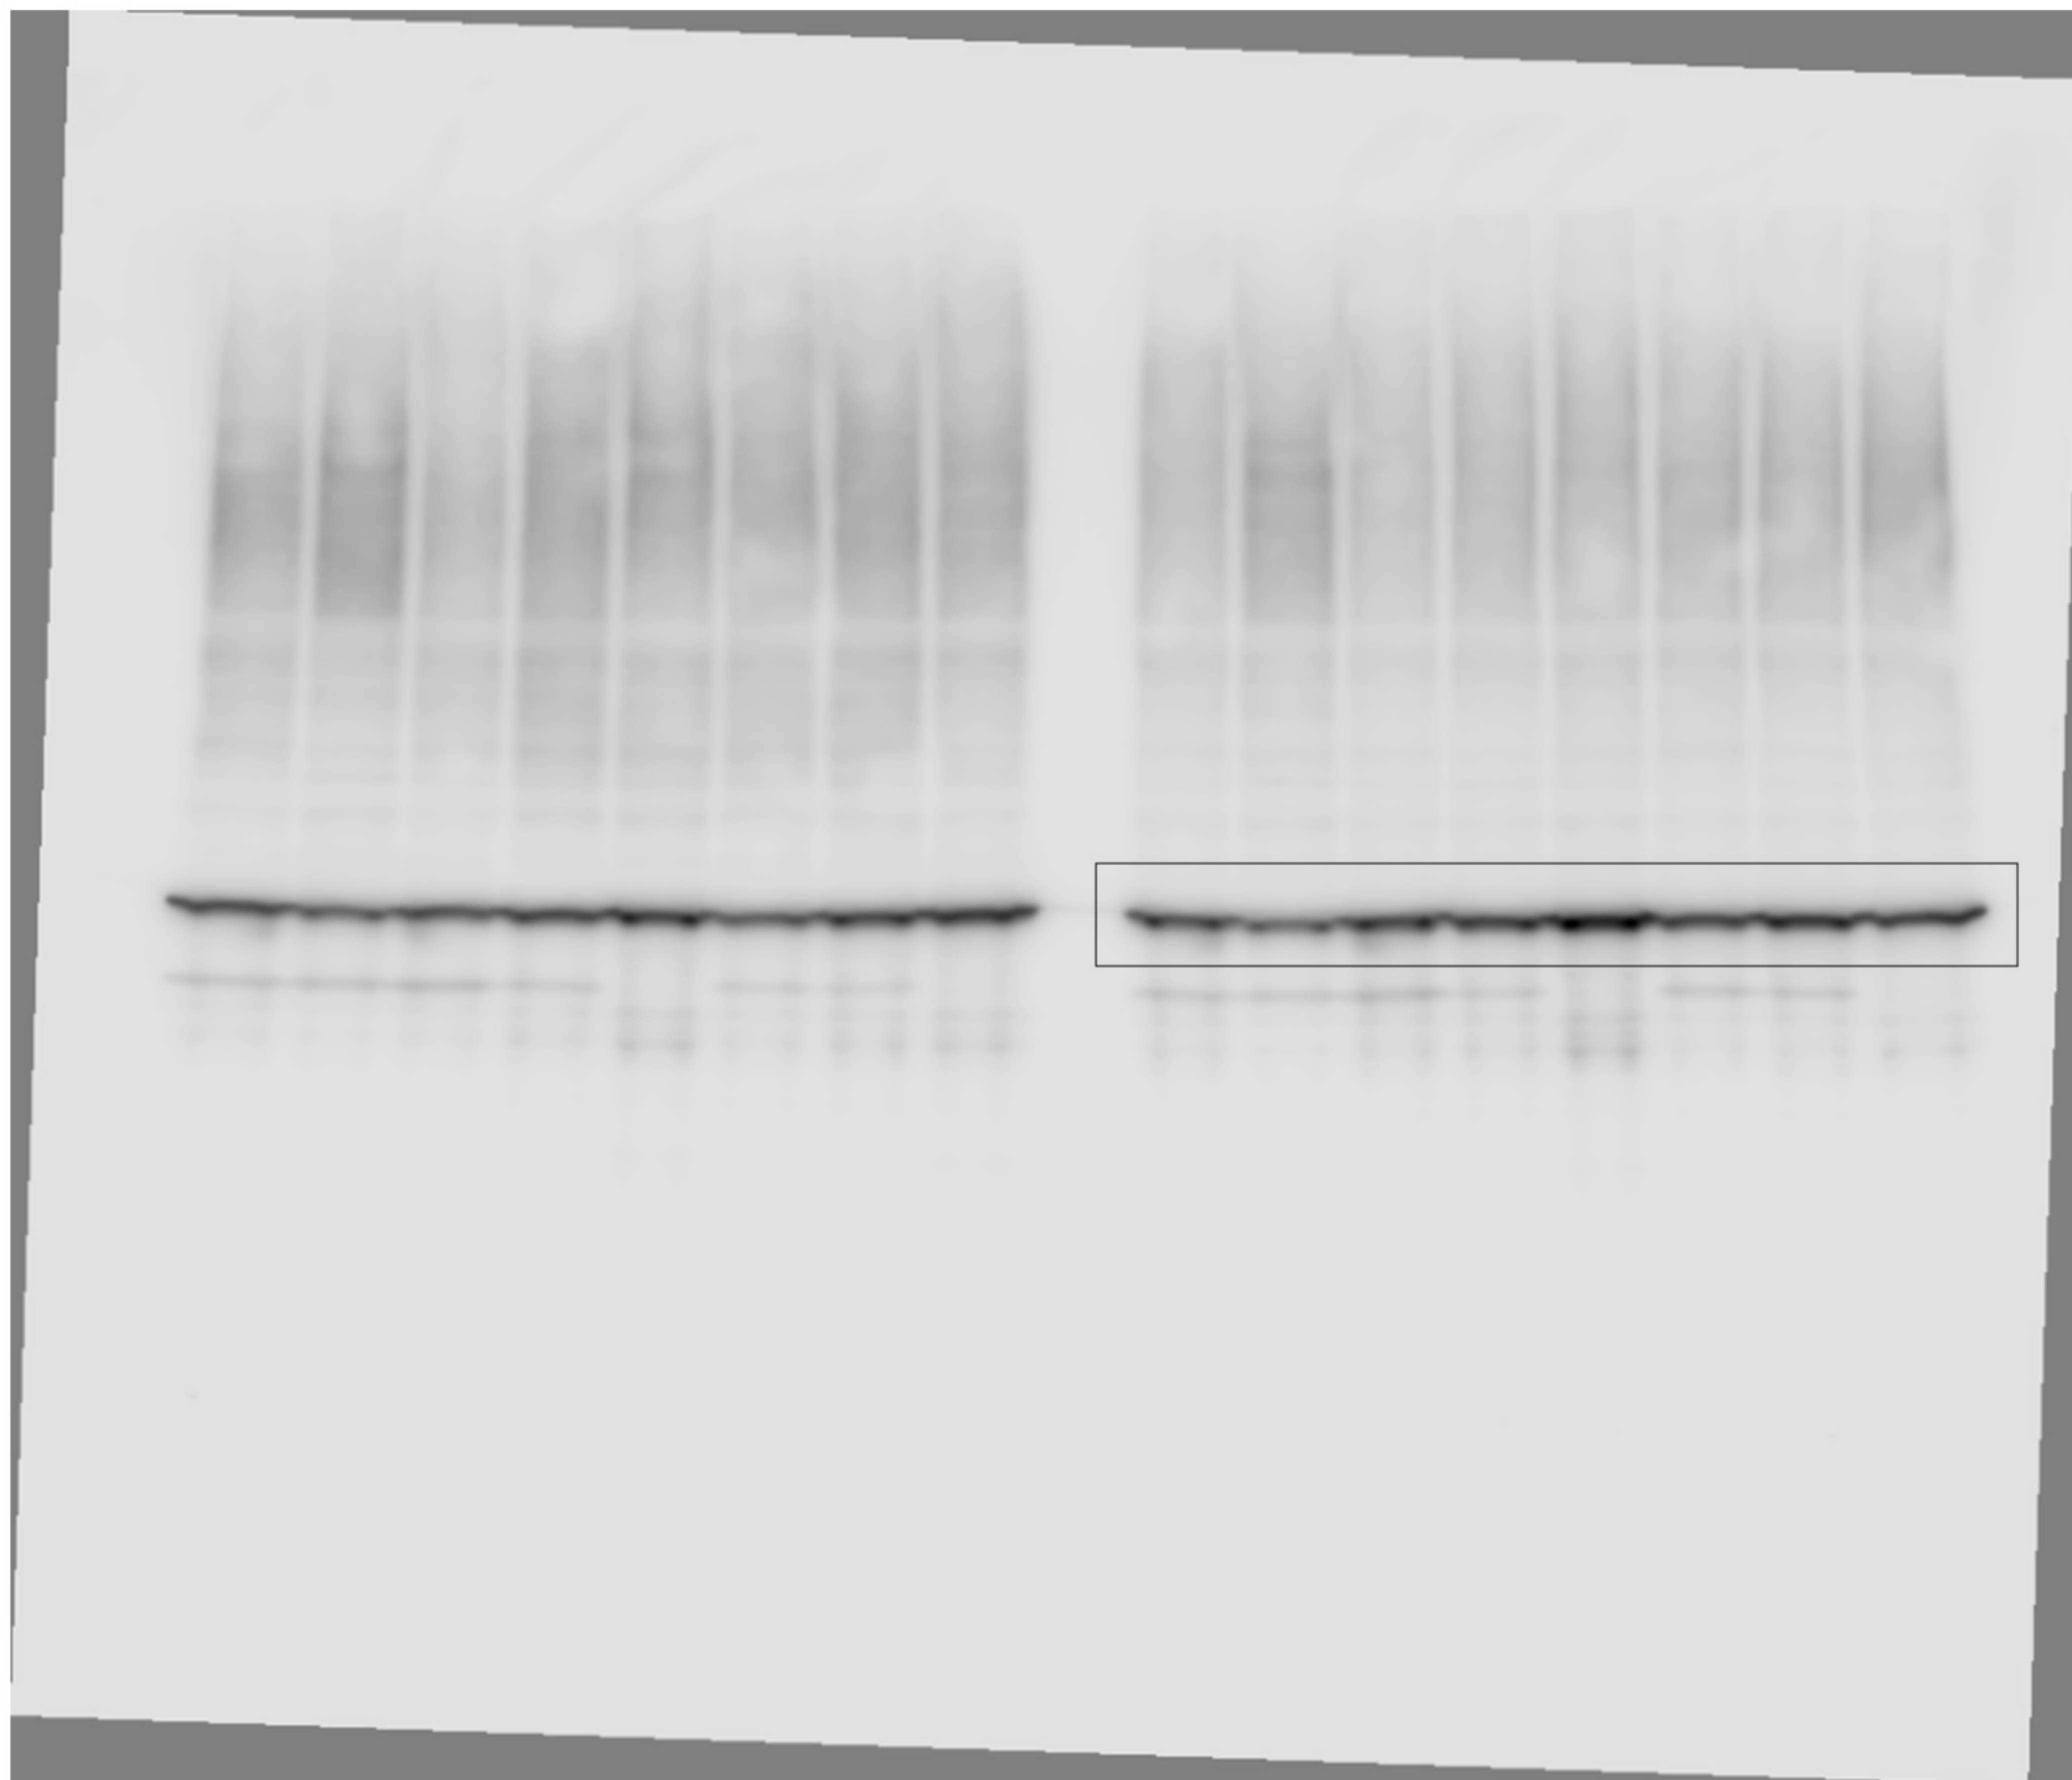

Cropped are for Figure1E  
llv5

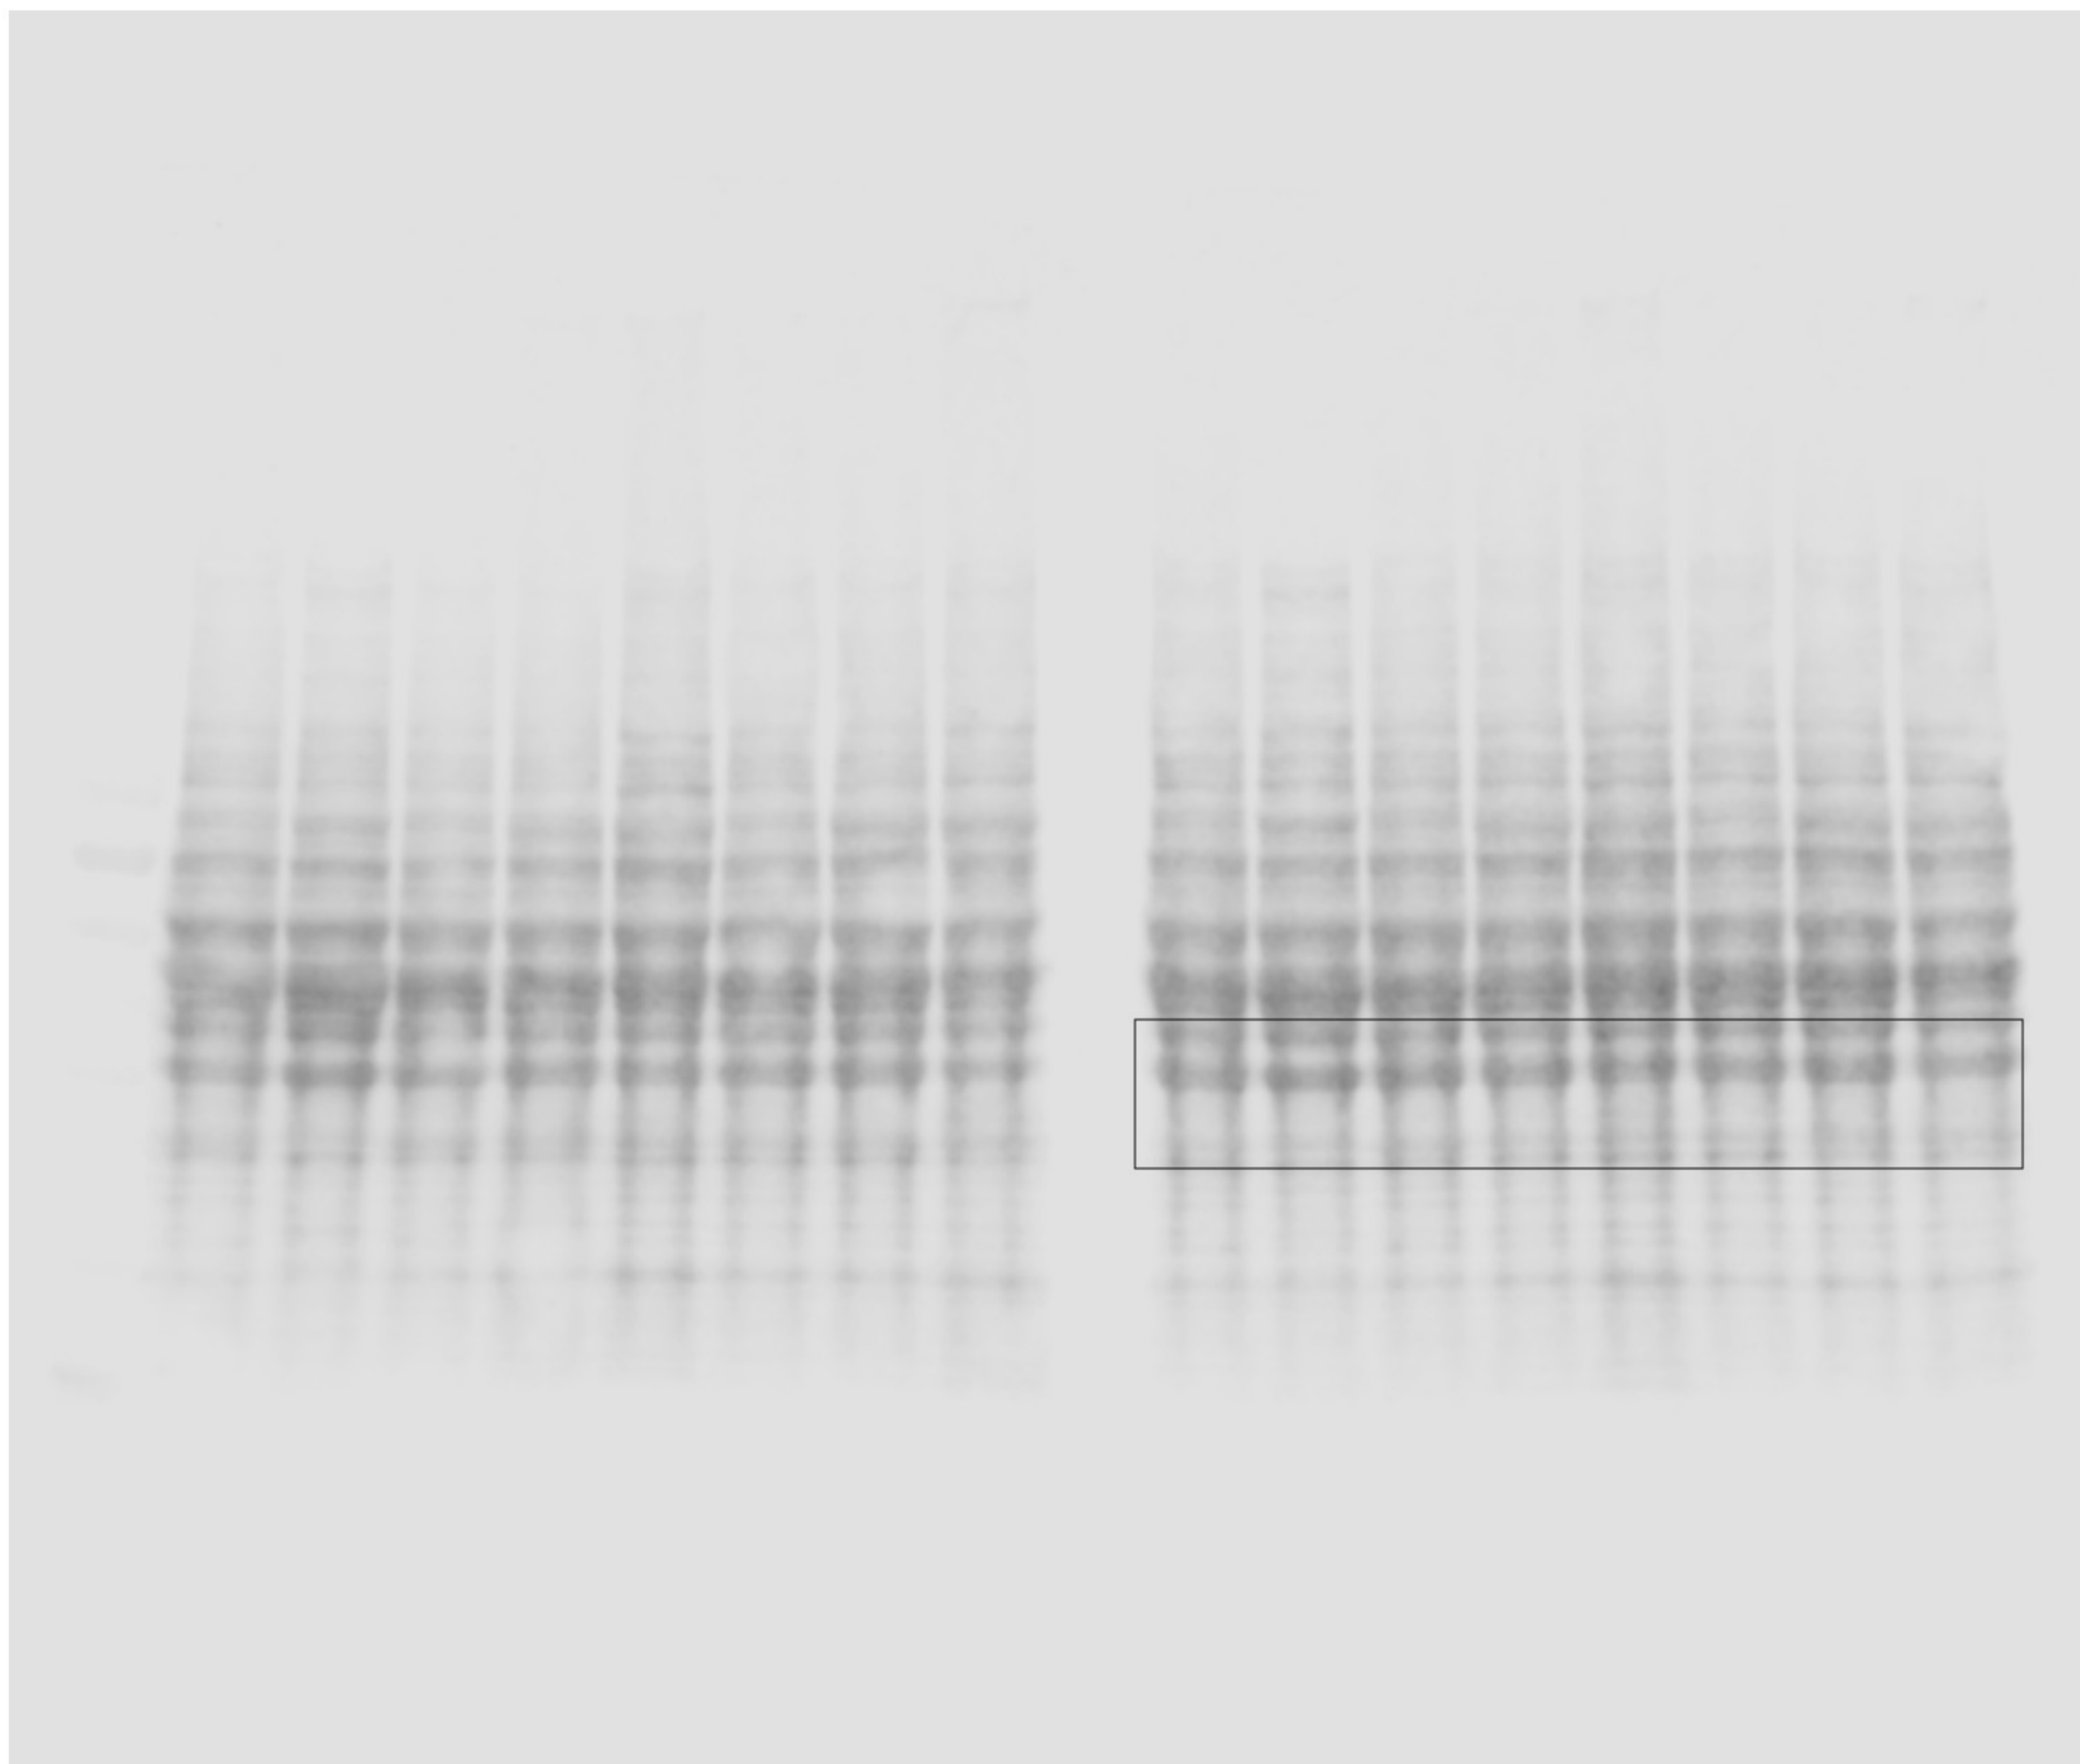

Cropped area for Figure 1E  
Total Protein Stain
