# Supplementary material for: Mitochondrial protein import clogging as a mechanism of disease
Source: eLife journal article supplement (doi:10.7554/elife.84330), 2023-05-02
Supplement: fig1-figsupp1-data1 [file Figure 1-figure supplement 1-source data annotated.pdf › Figure 1-figure supplement 1/Figure 1-figure supplement 1-source data annotated.pdf]

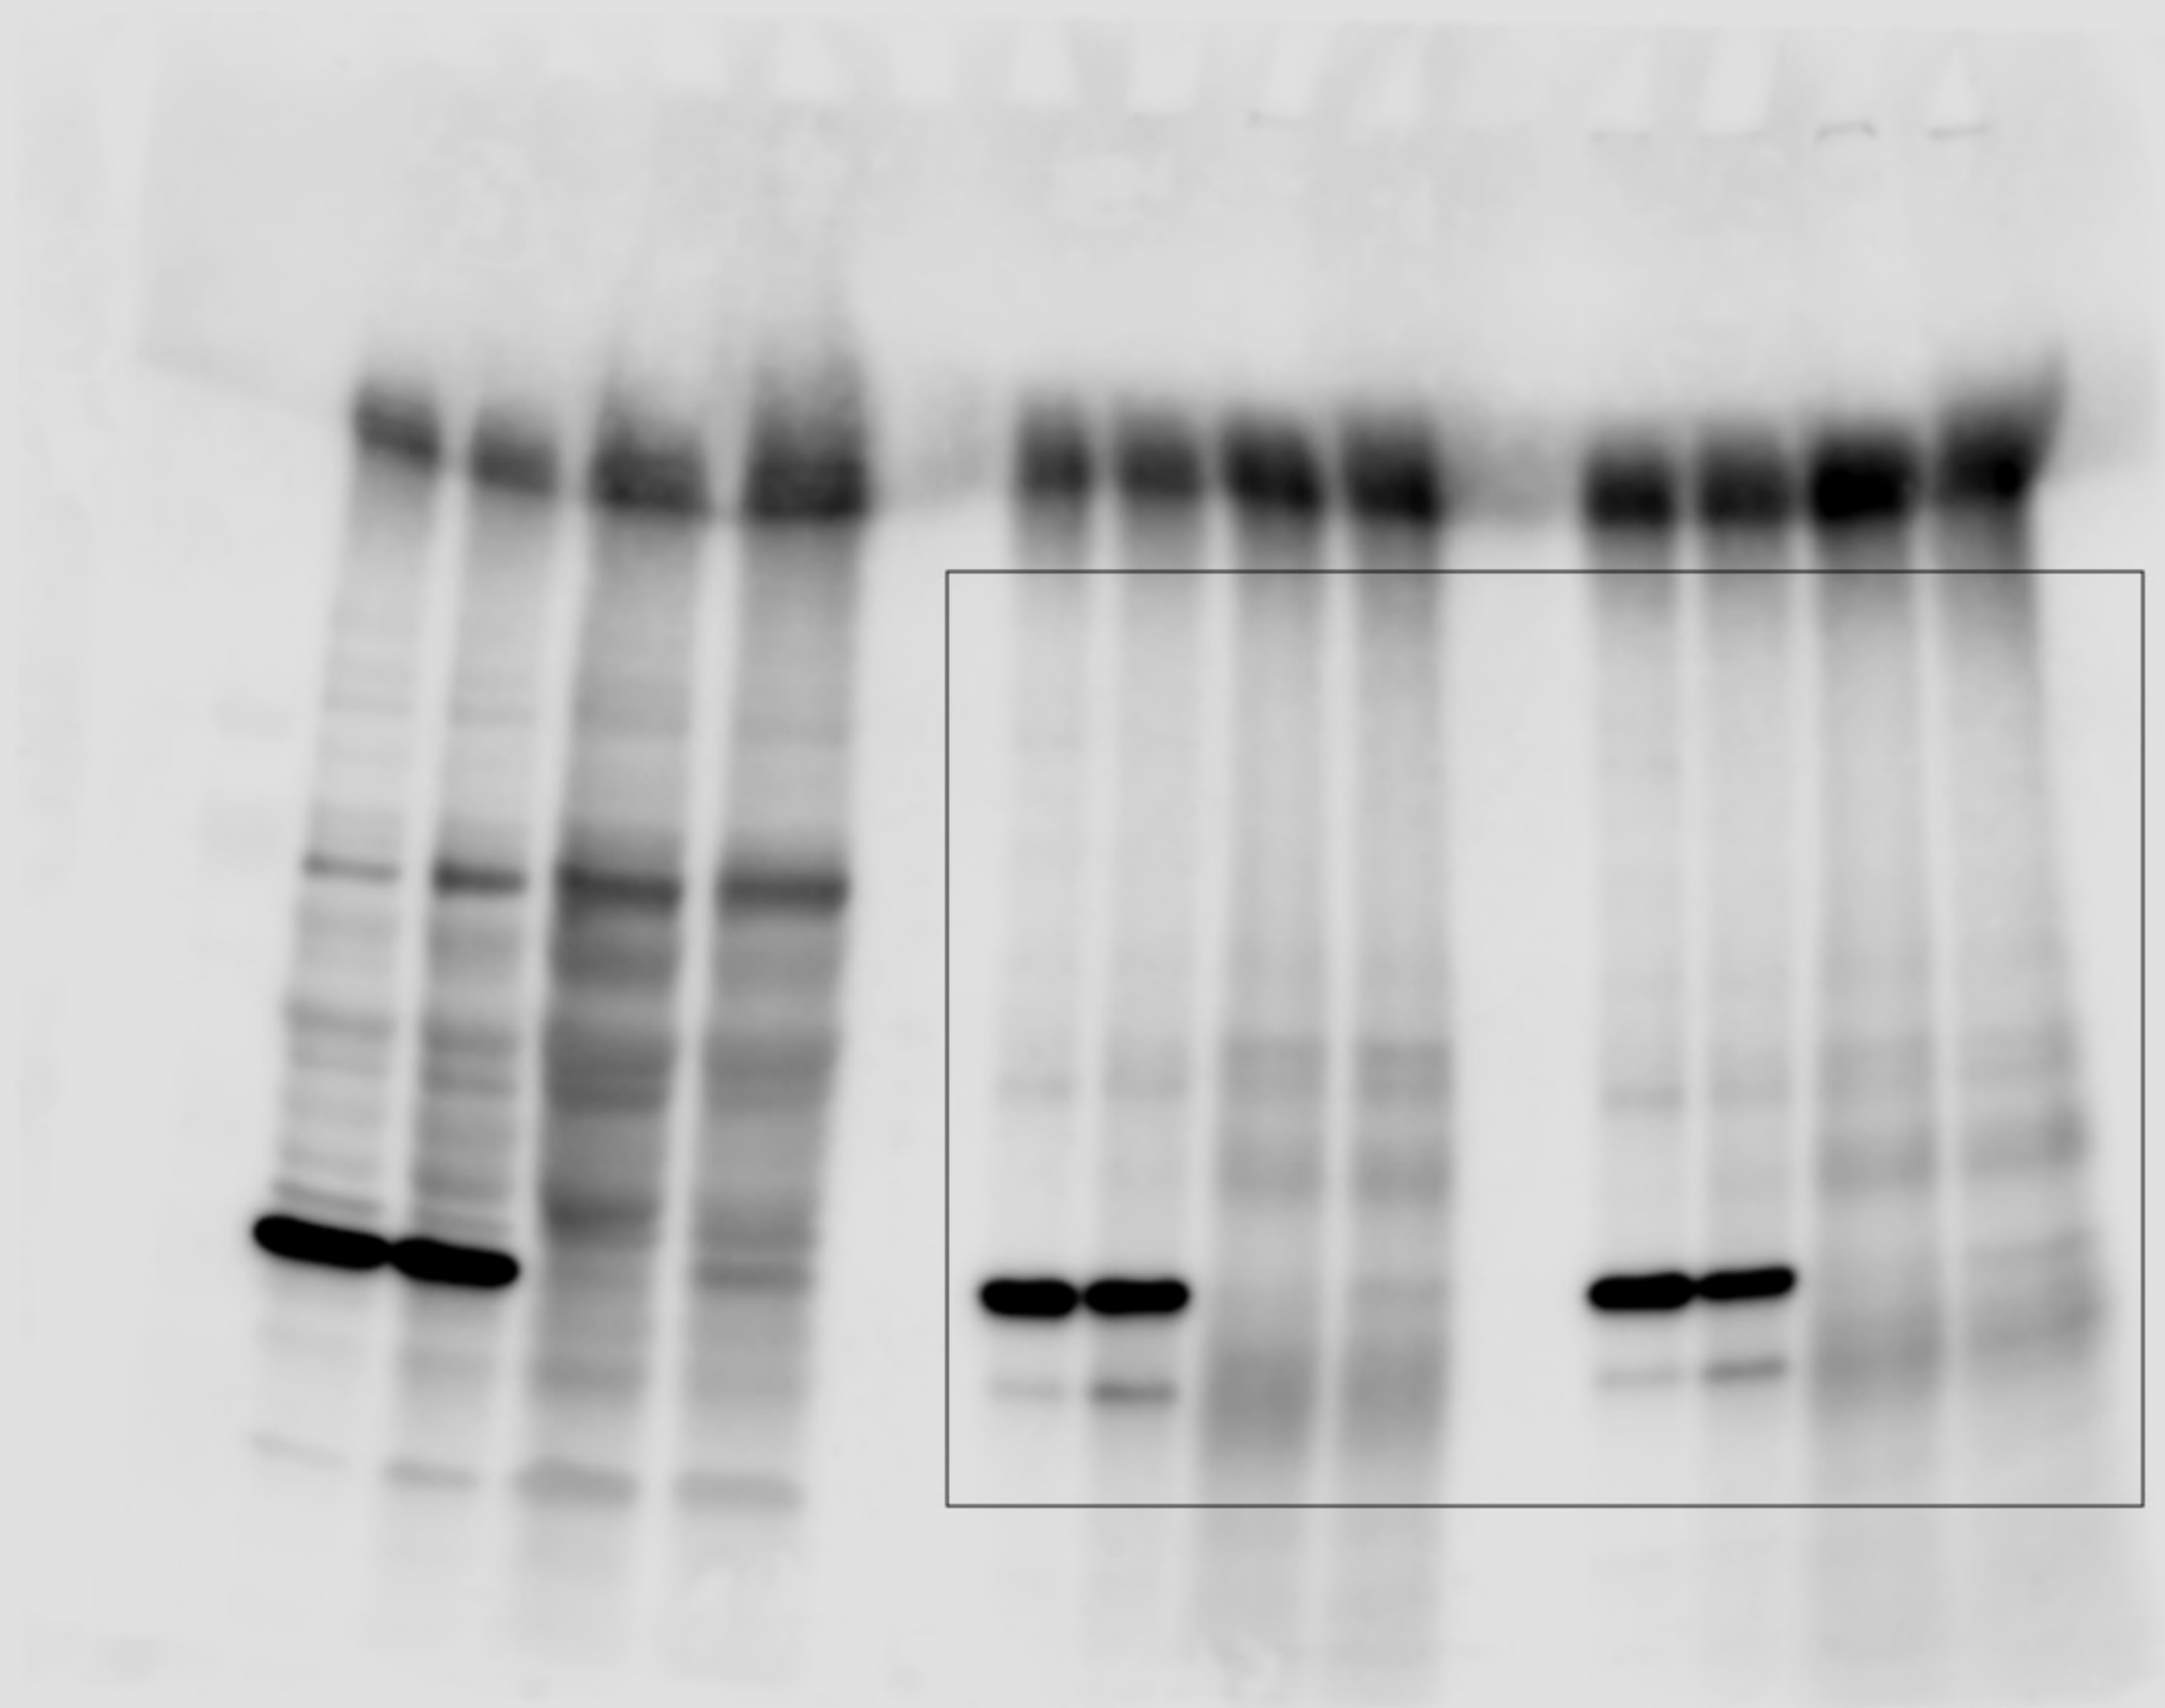

Cropped area for Figure S1B  
AAC2

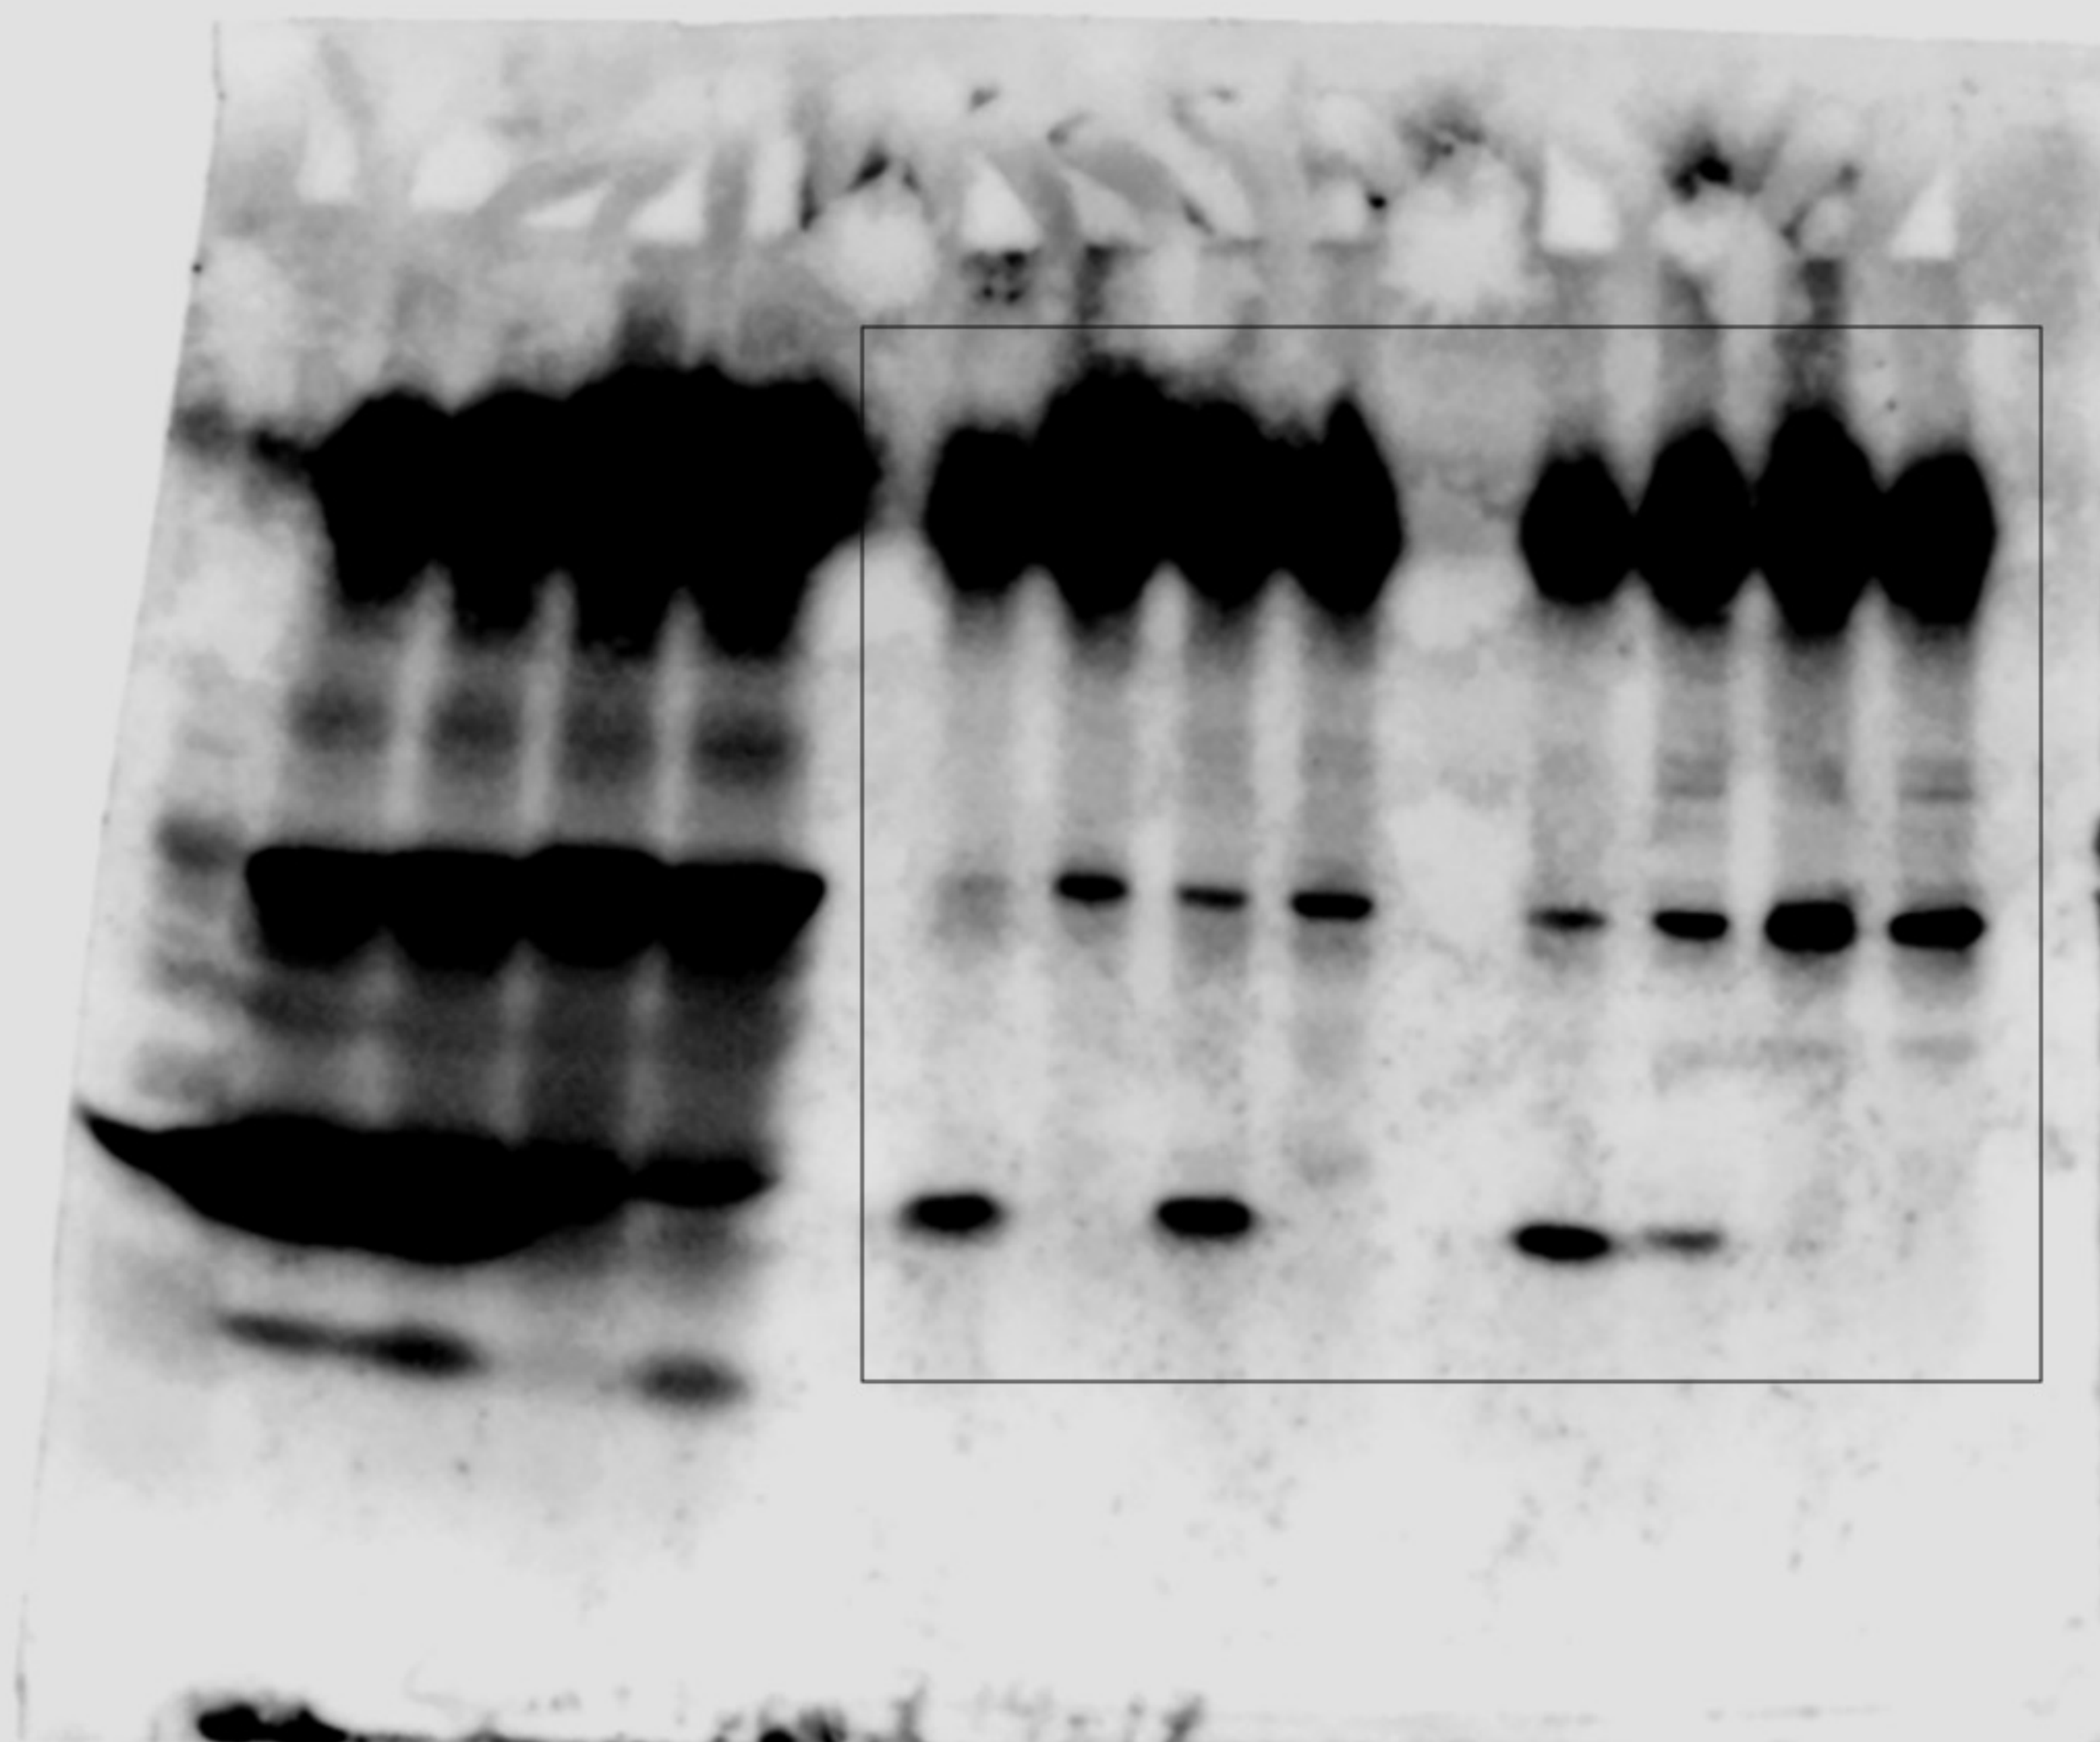

Cropped area for Figure S1C, left  
AAC2

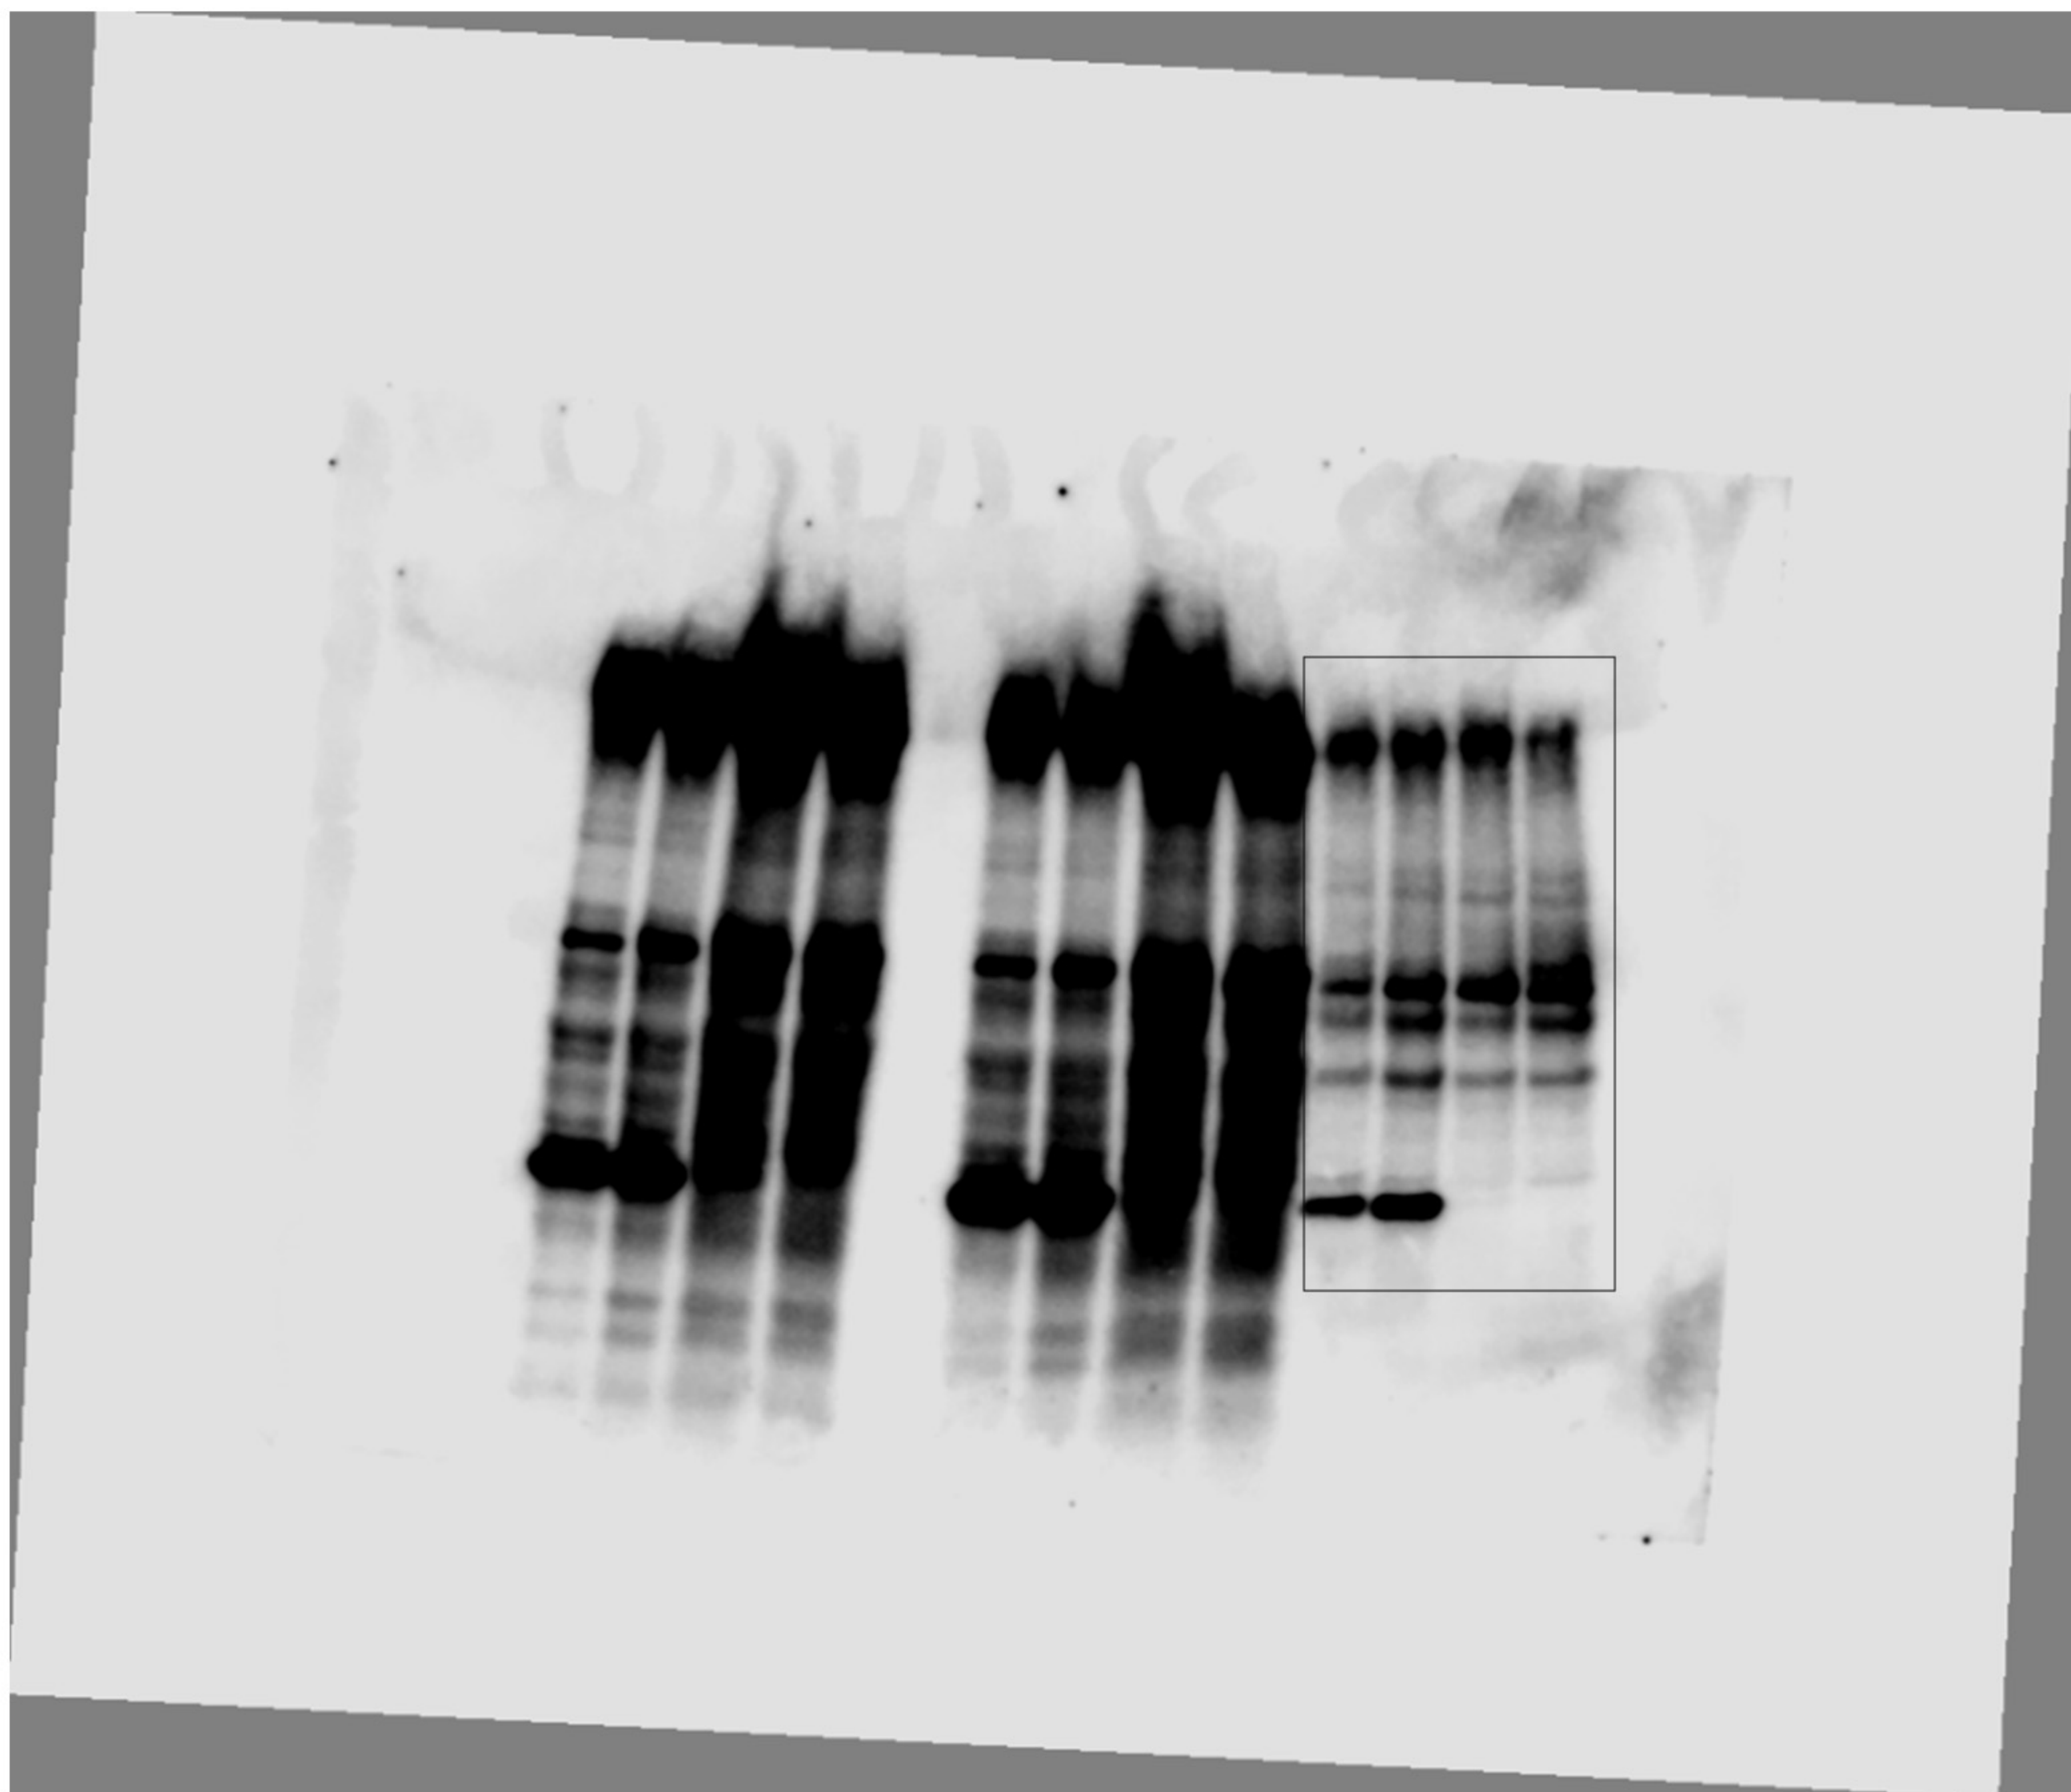

Cropped area for Figure S1C right  
AAC2
