# Supplementary material for: Mitochondrial protein import clogging as a mechanism of disease
Source: eLife journal article supplement (doi:10.7554/elife.84330), 2023-05-02
Supplement: fig2-data1 [file elife-84330-fig2-data1-v2.zip]

Fig.2A

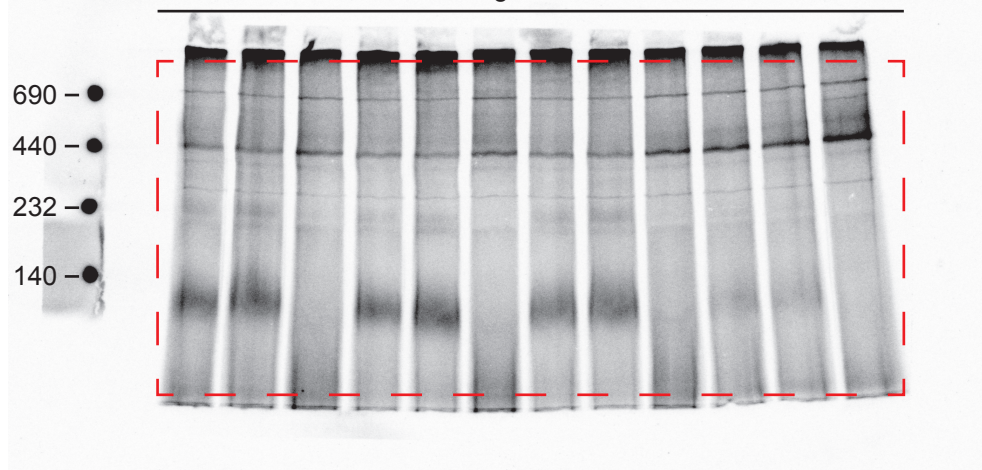

Fig.2C

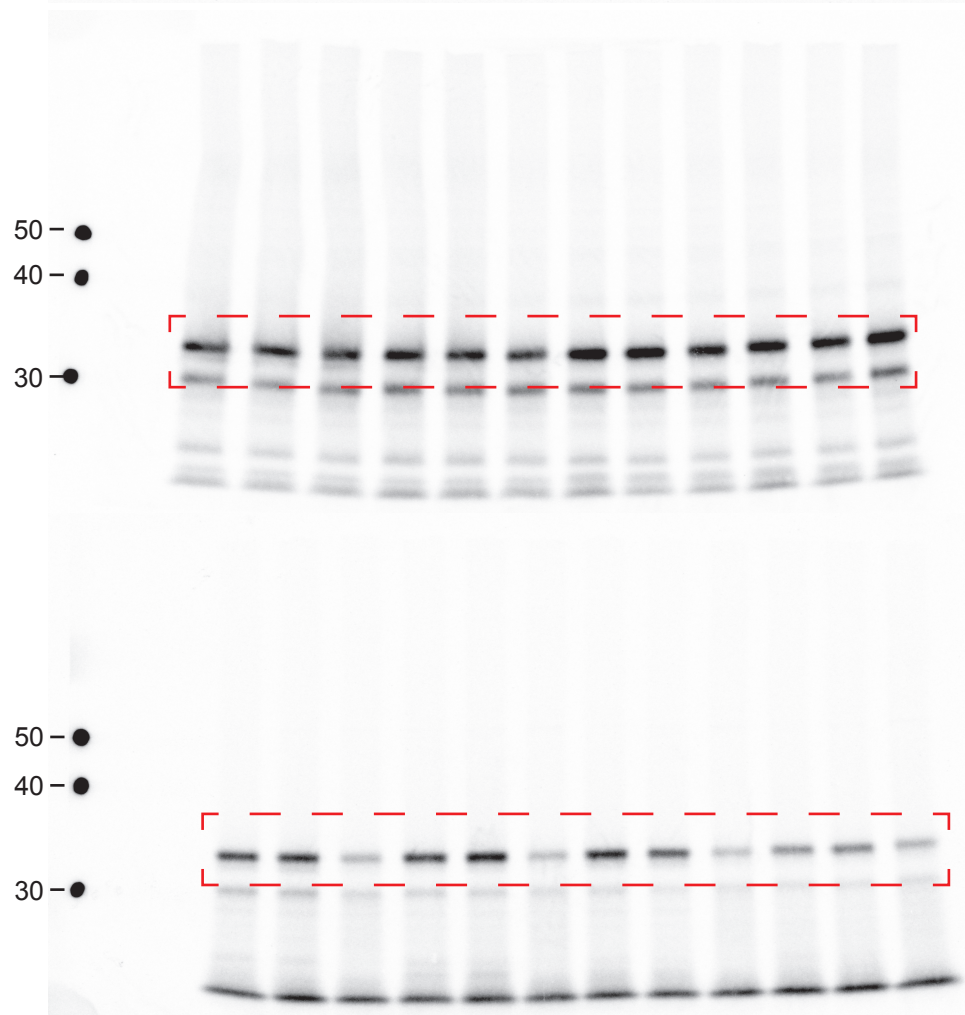

Fig.2E

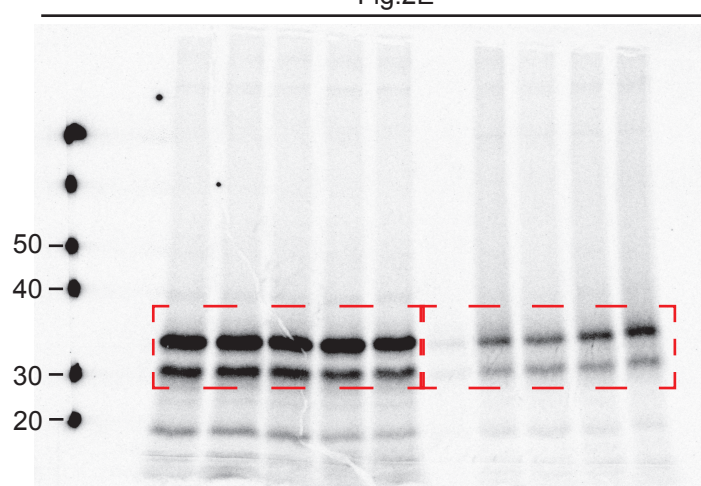

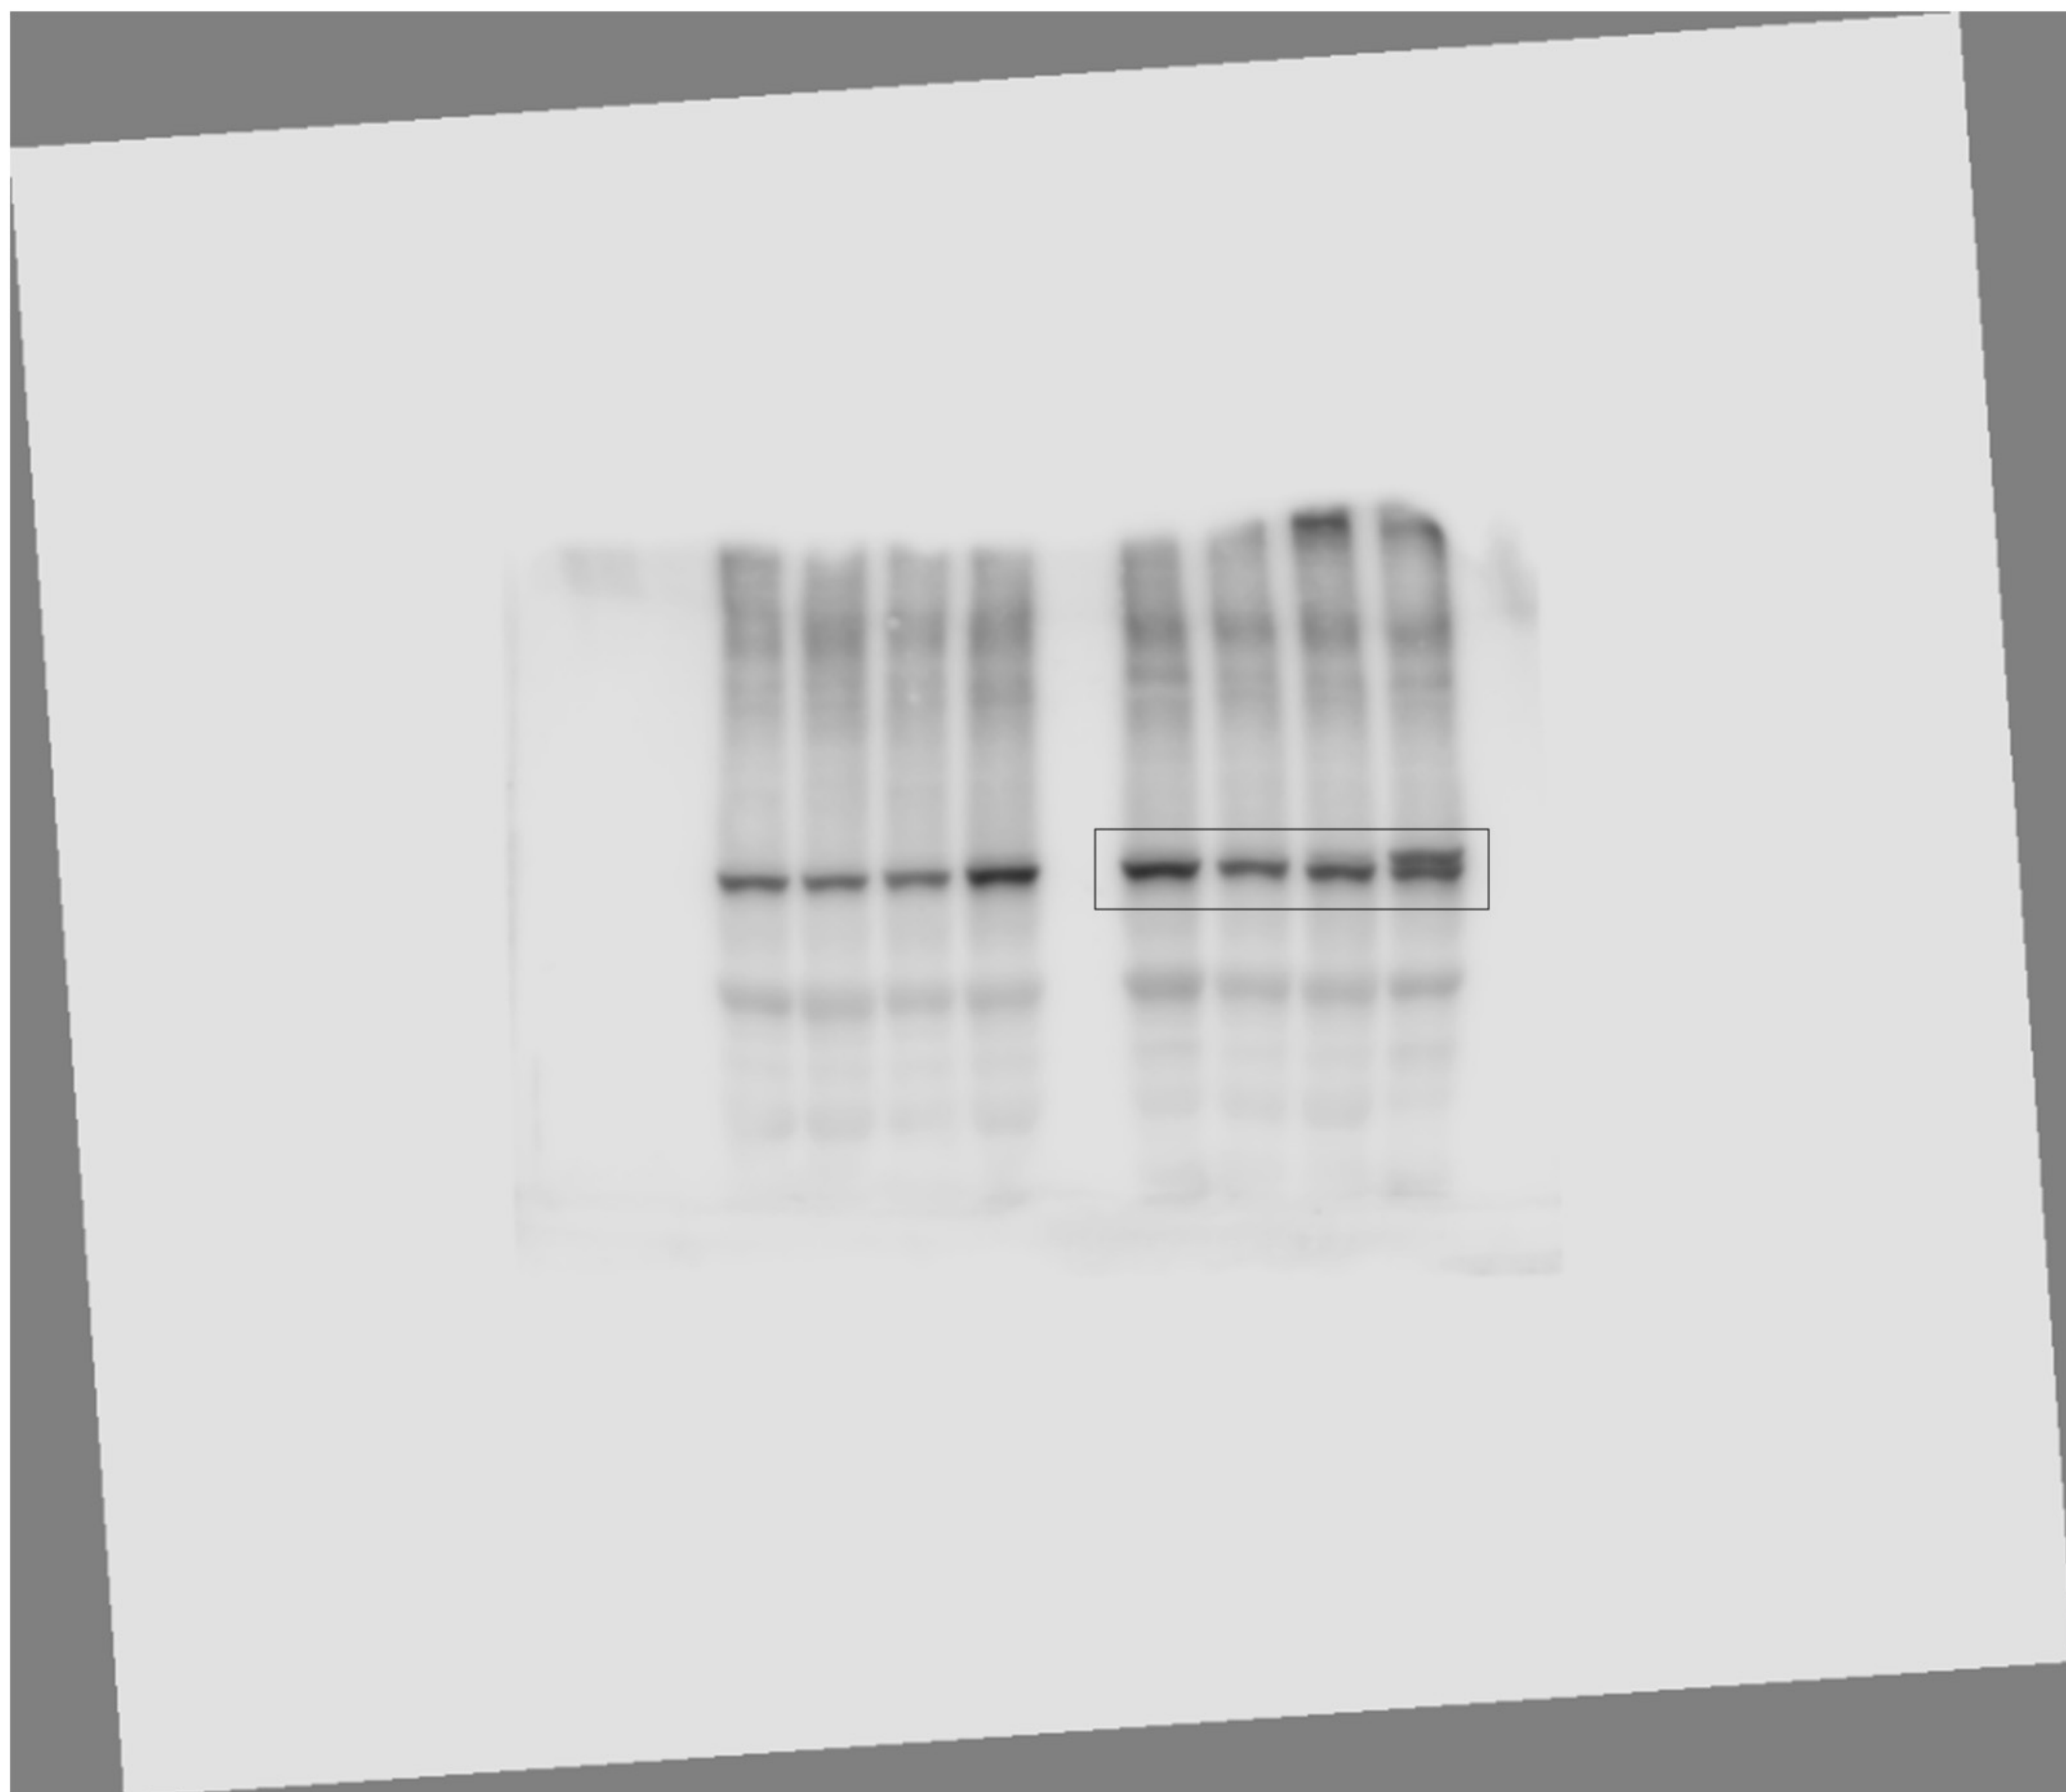

Cropped area for Figure 2G  
Hsp60

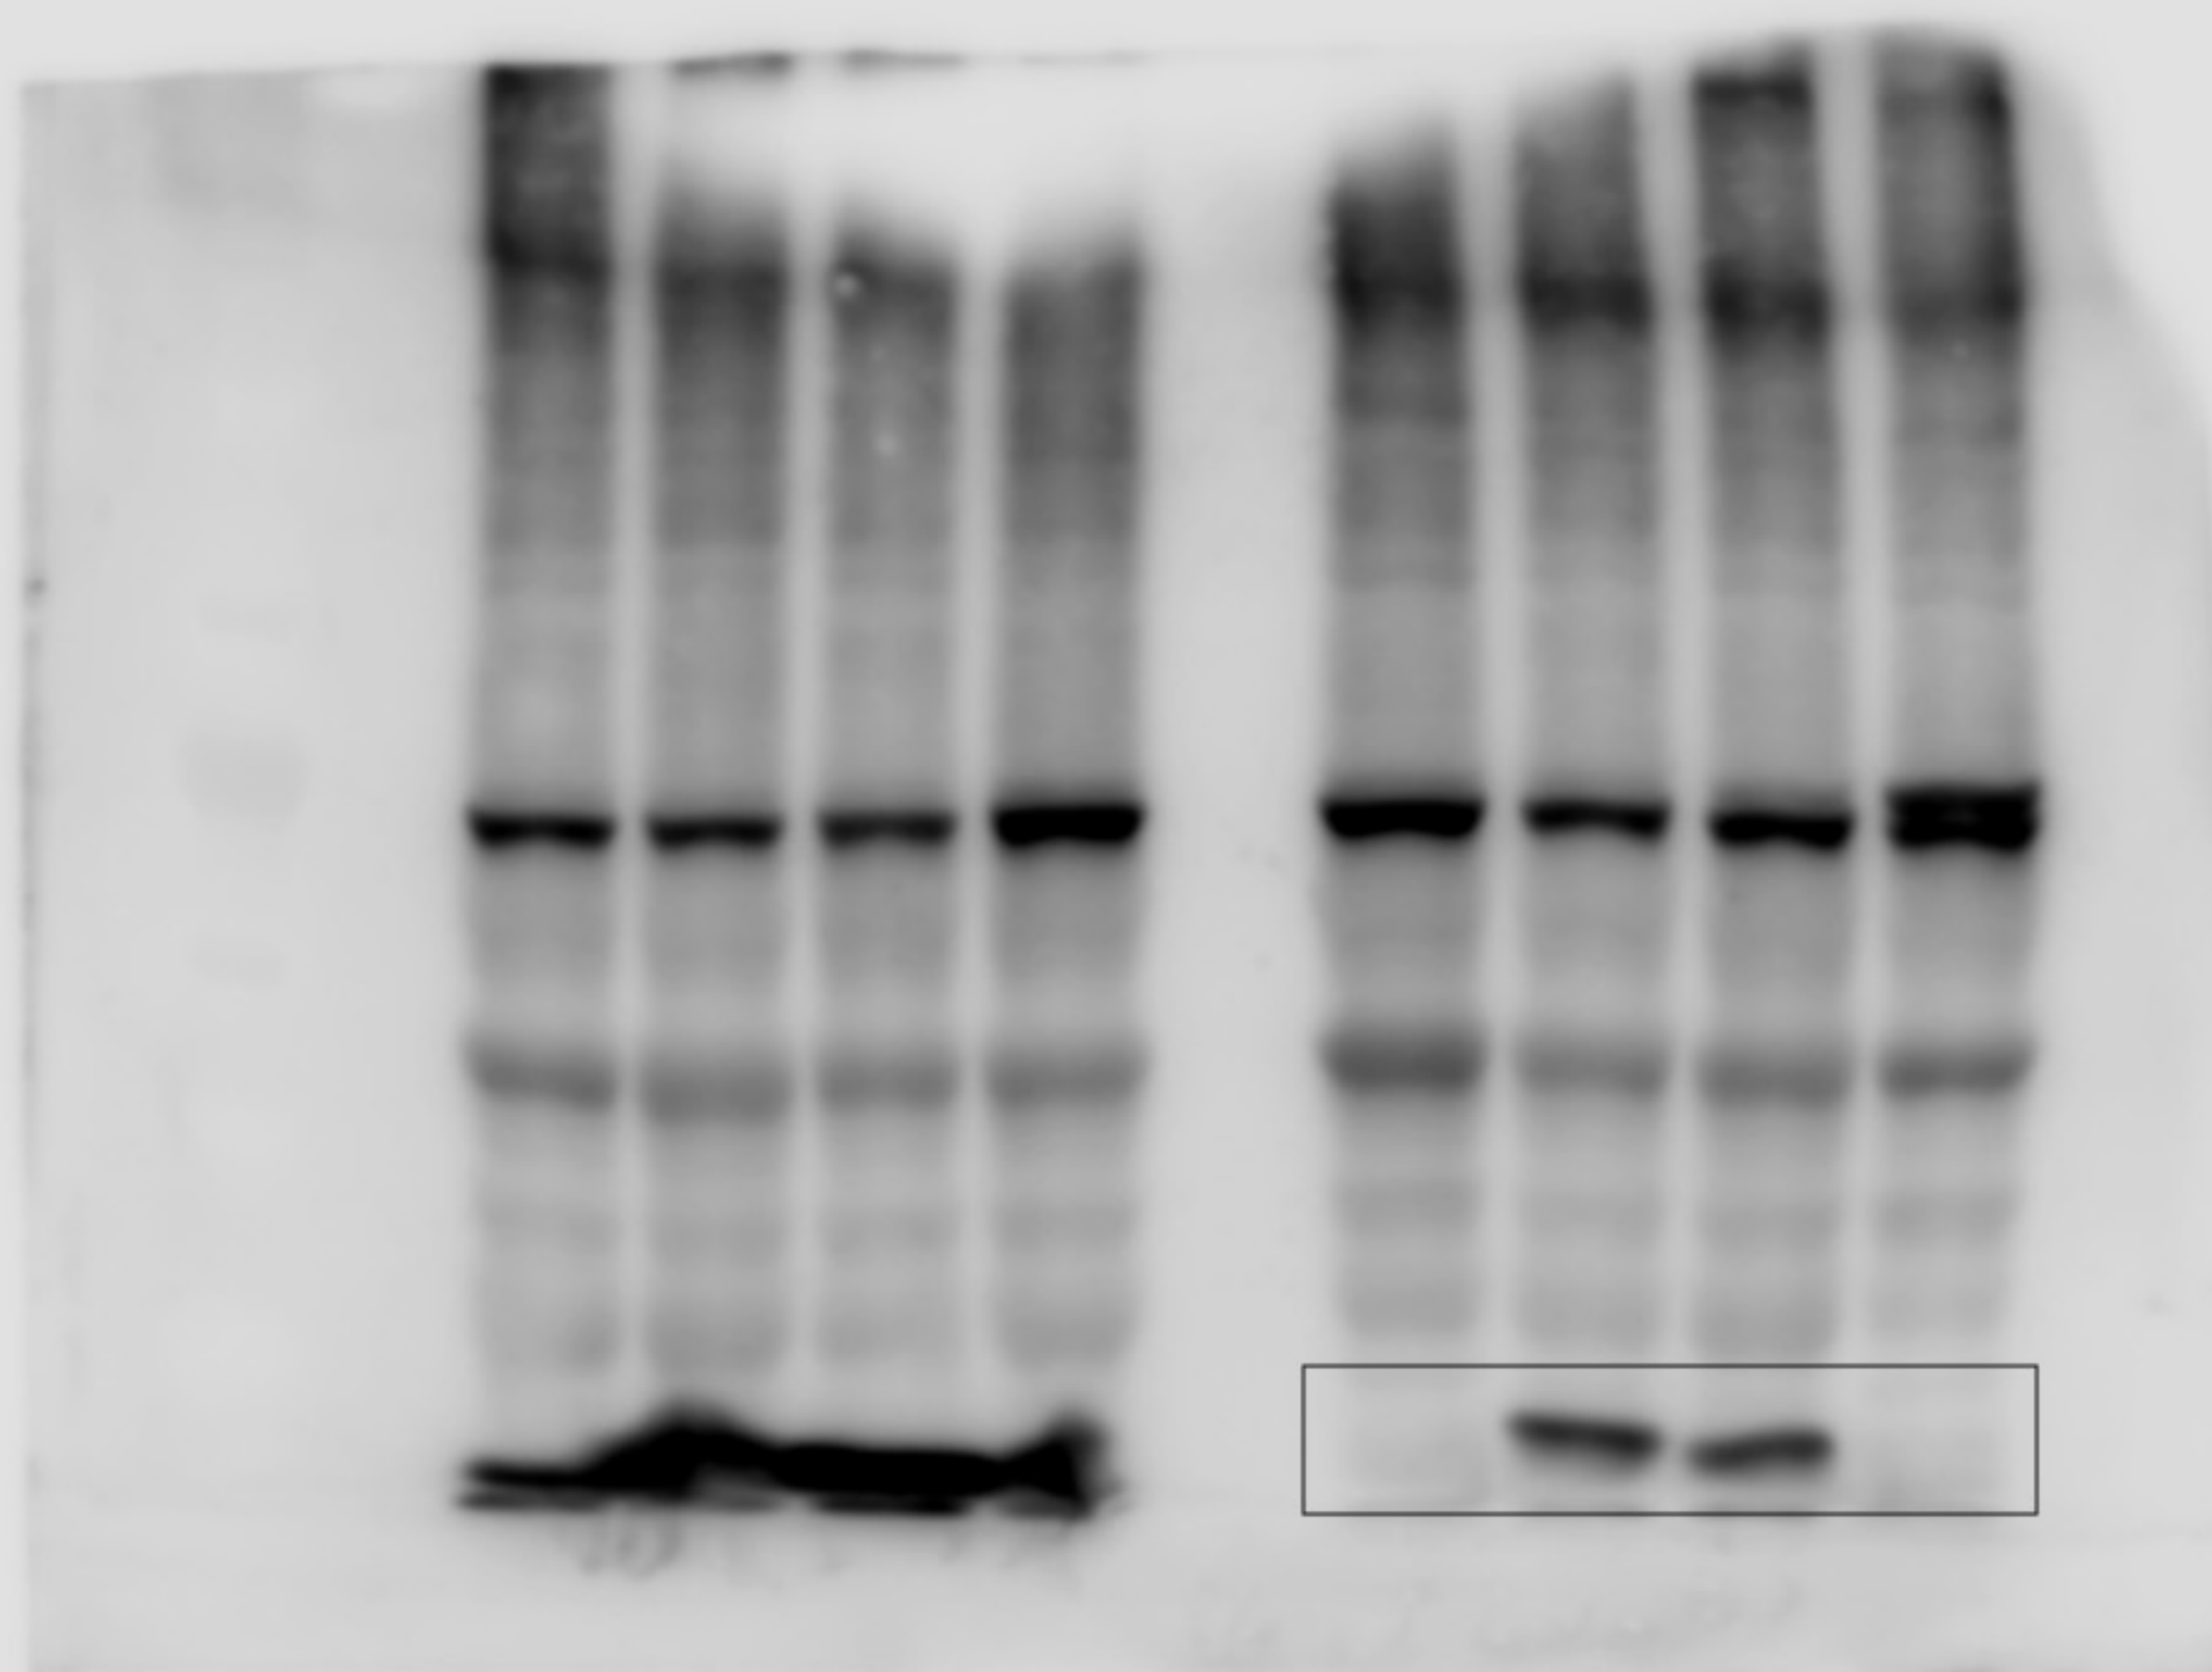

Cropped area for Figure 2G  
Aac2

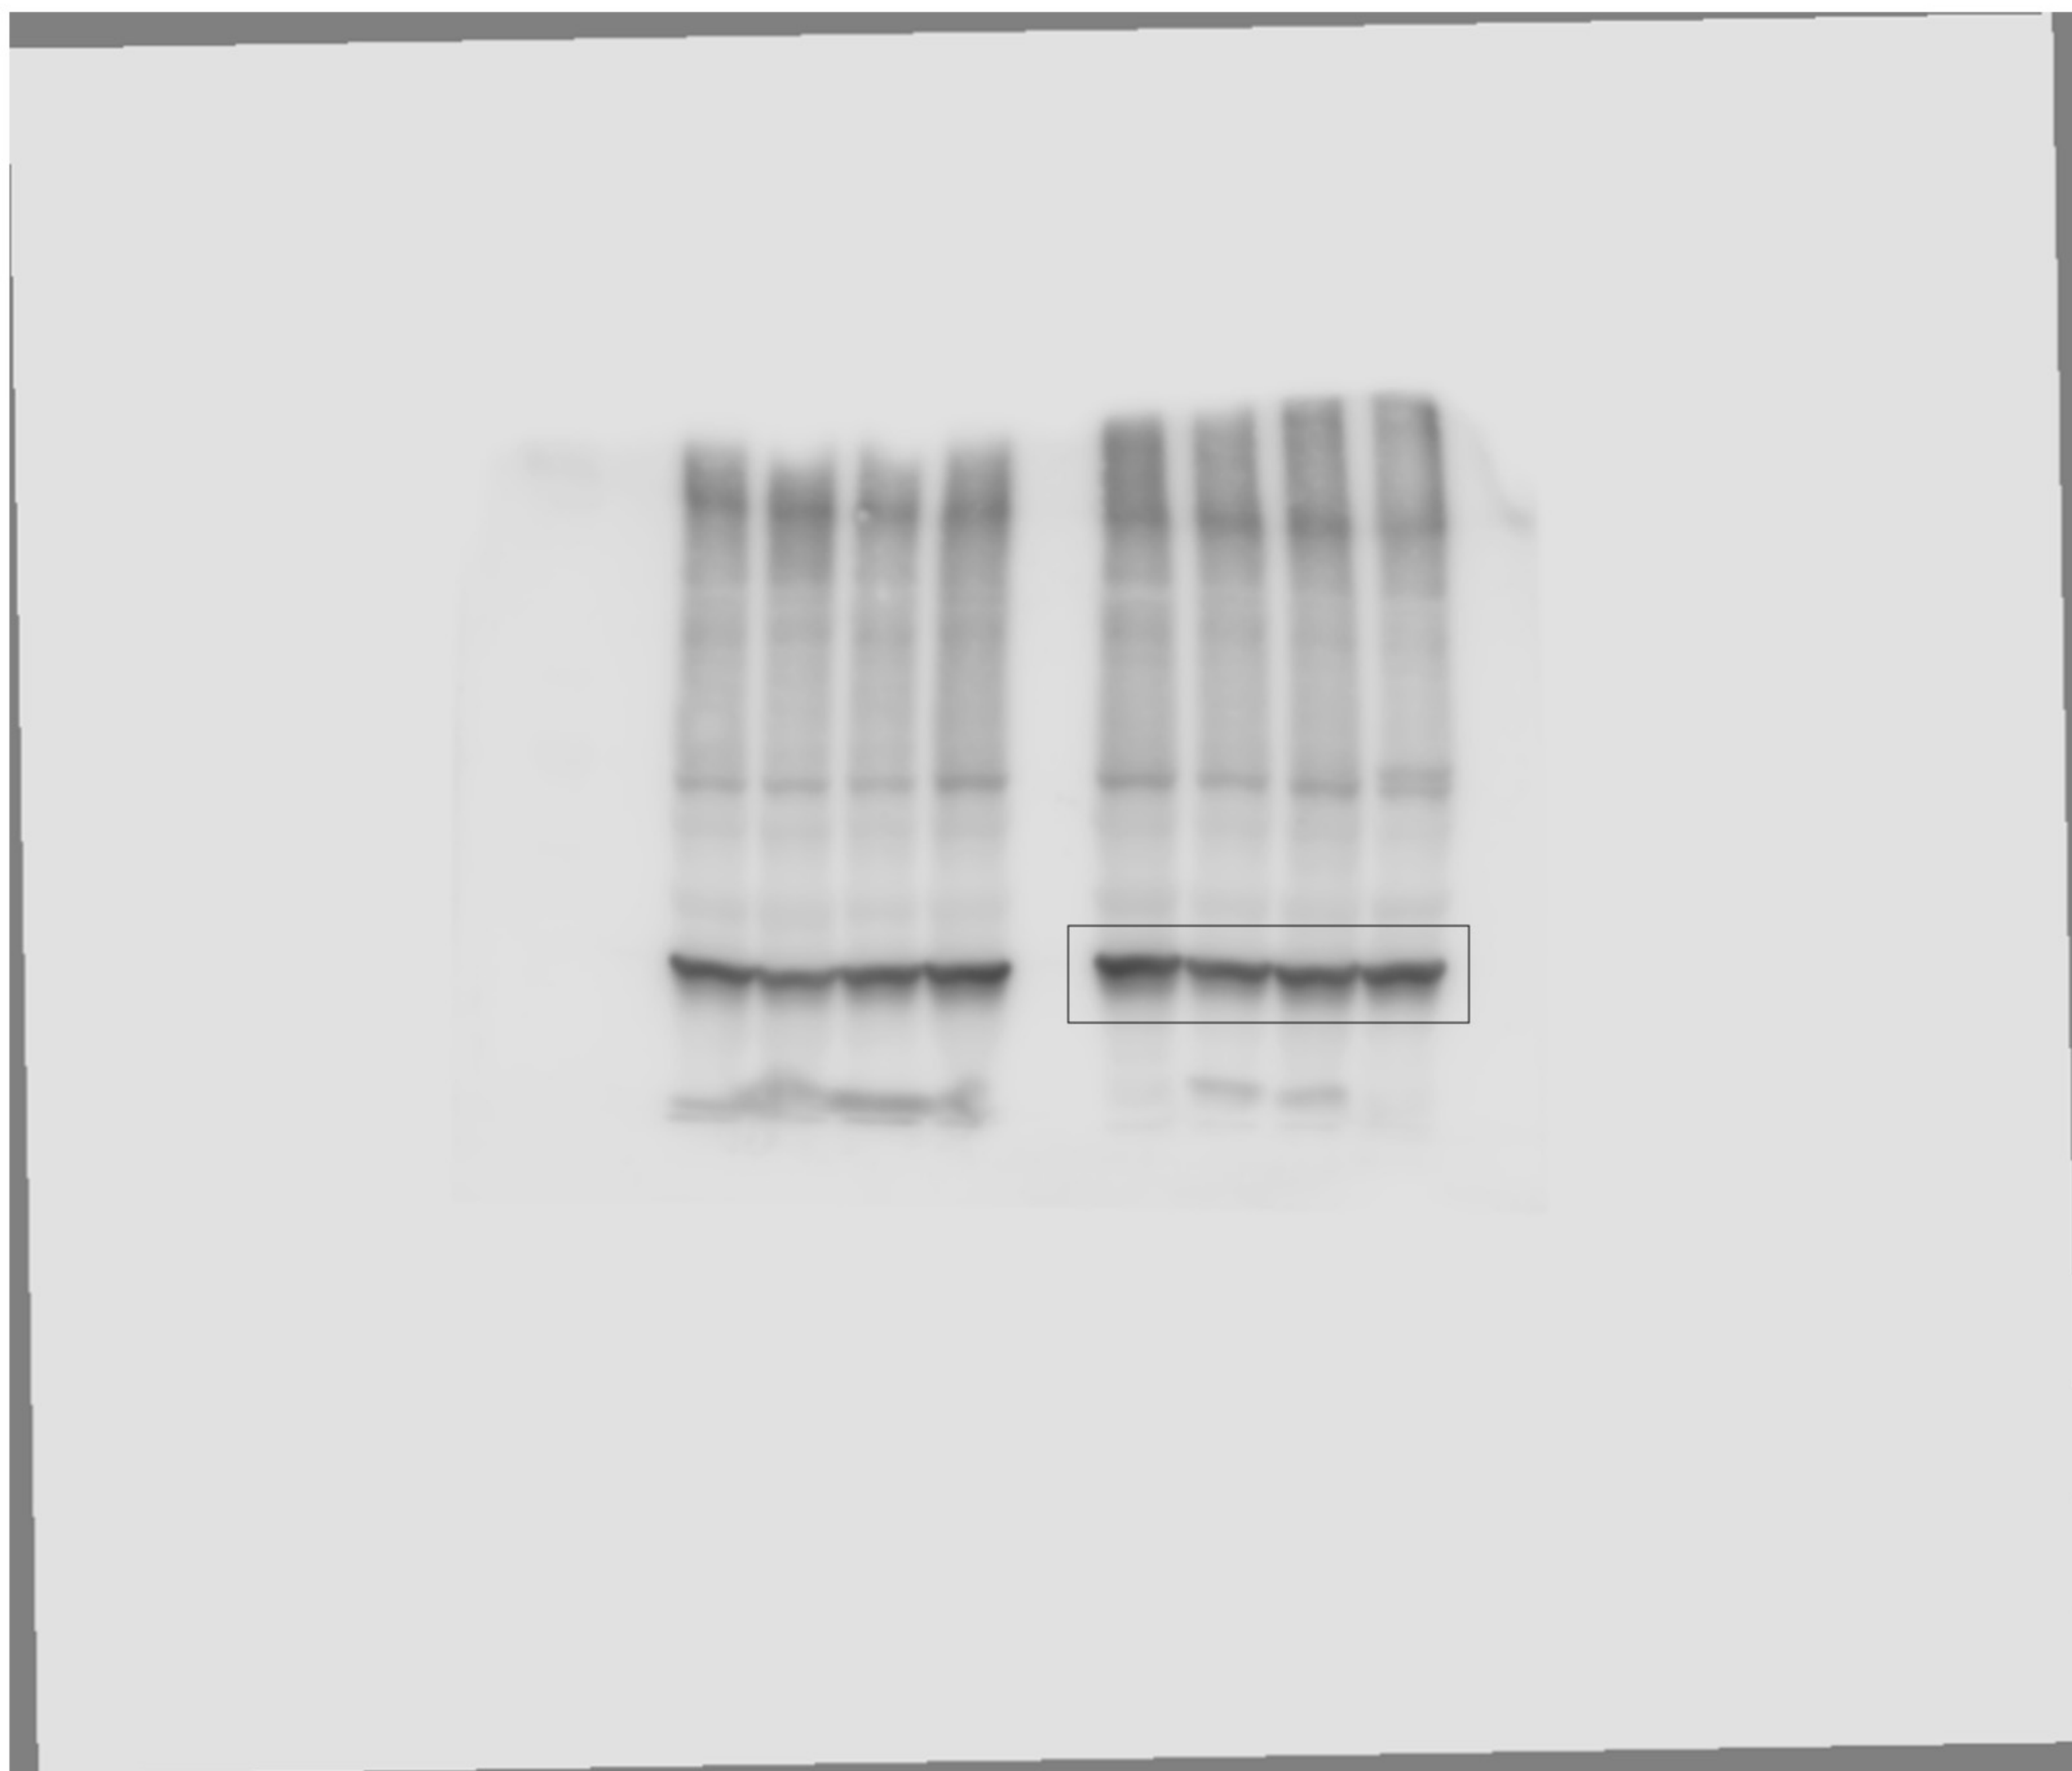

Cropped area for Figure 2G  
llv5



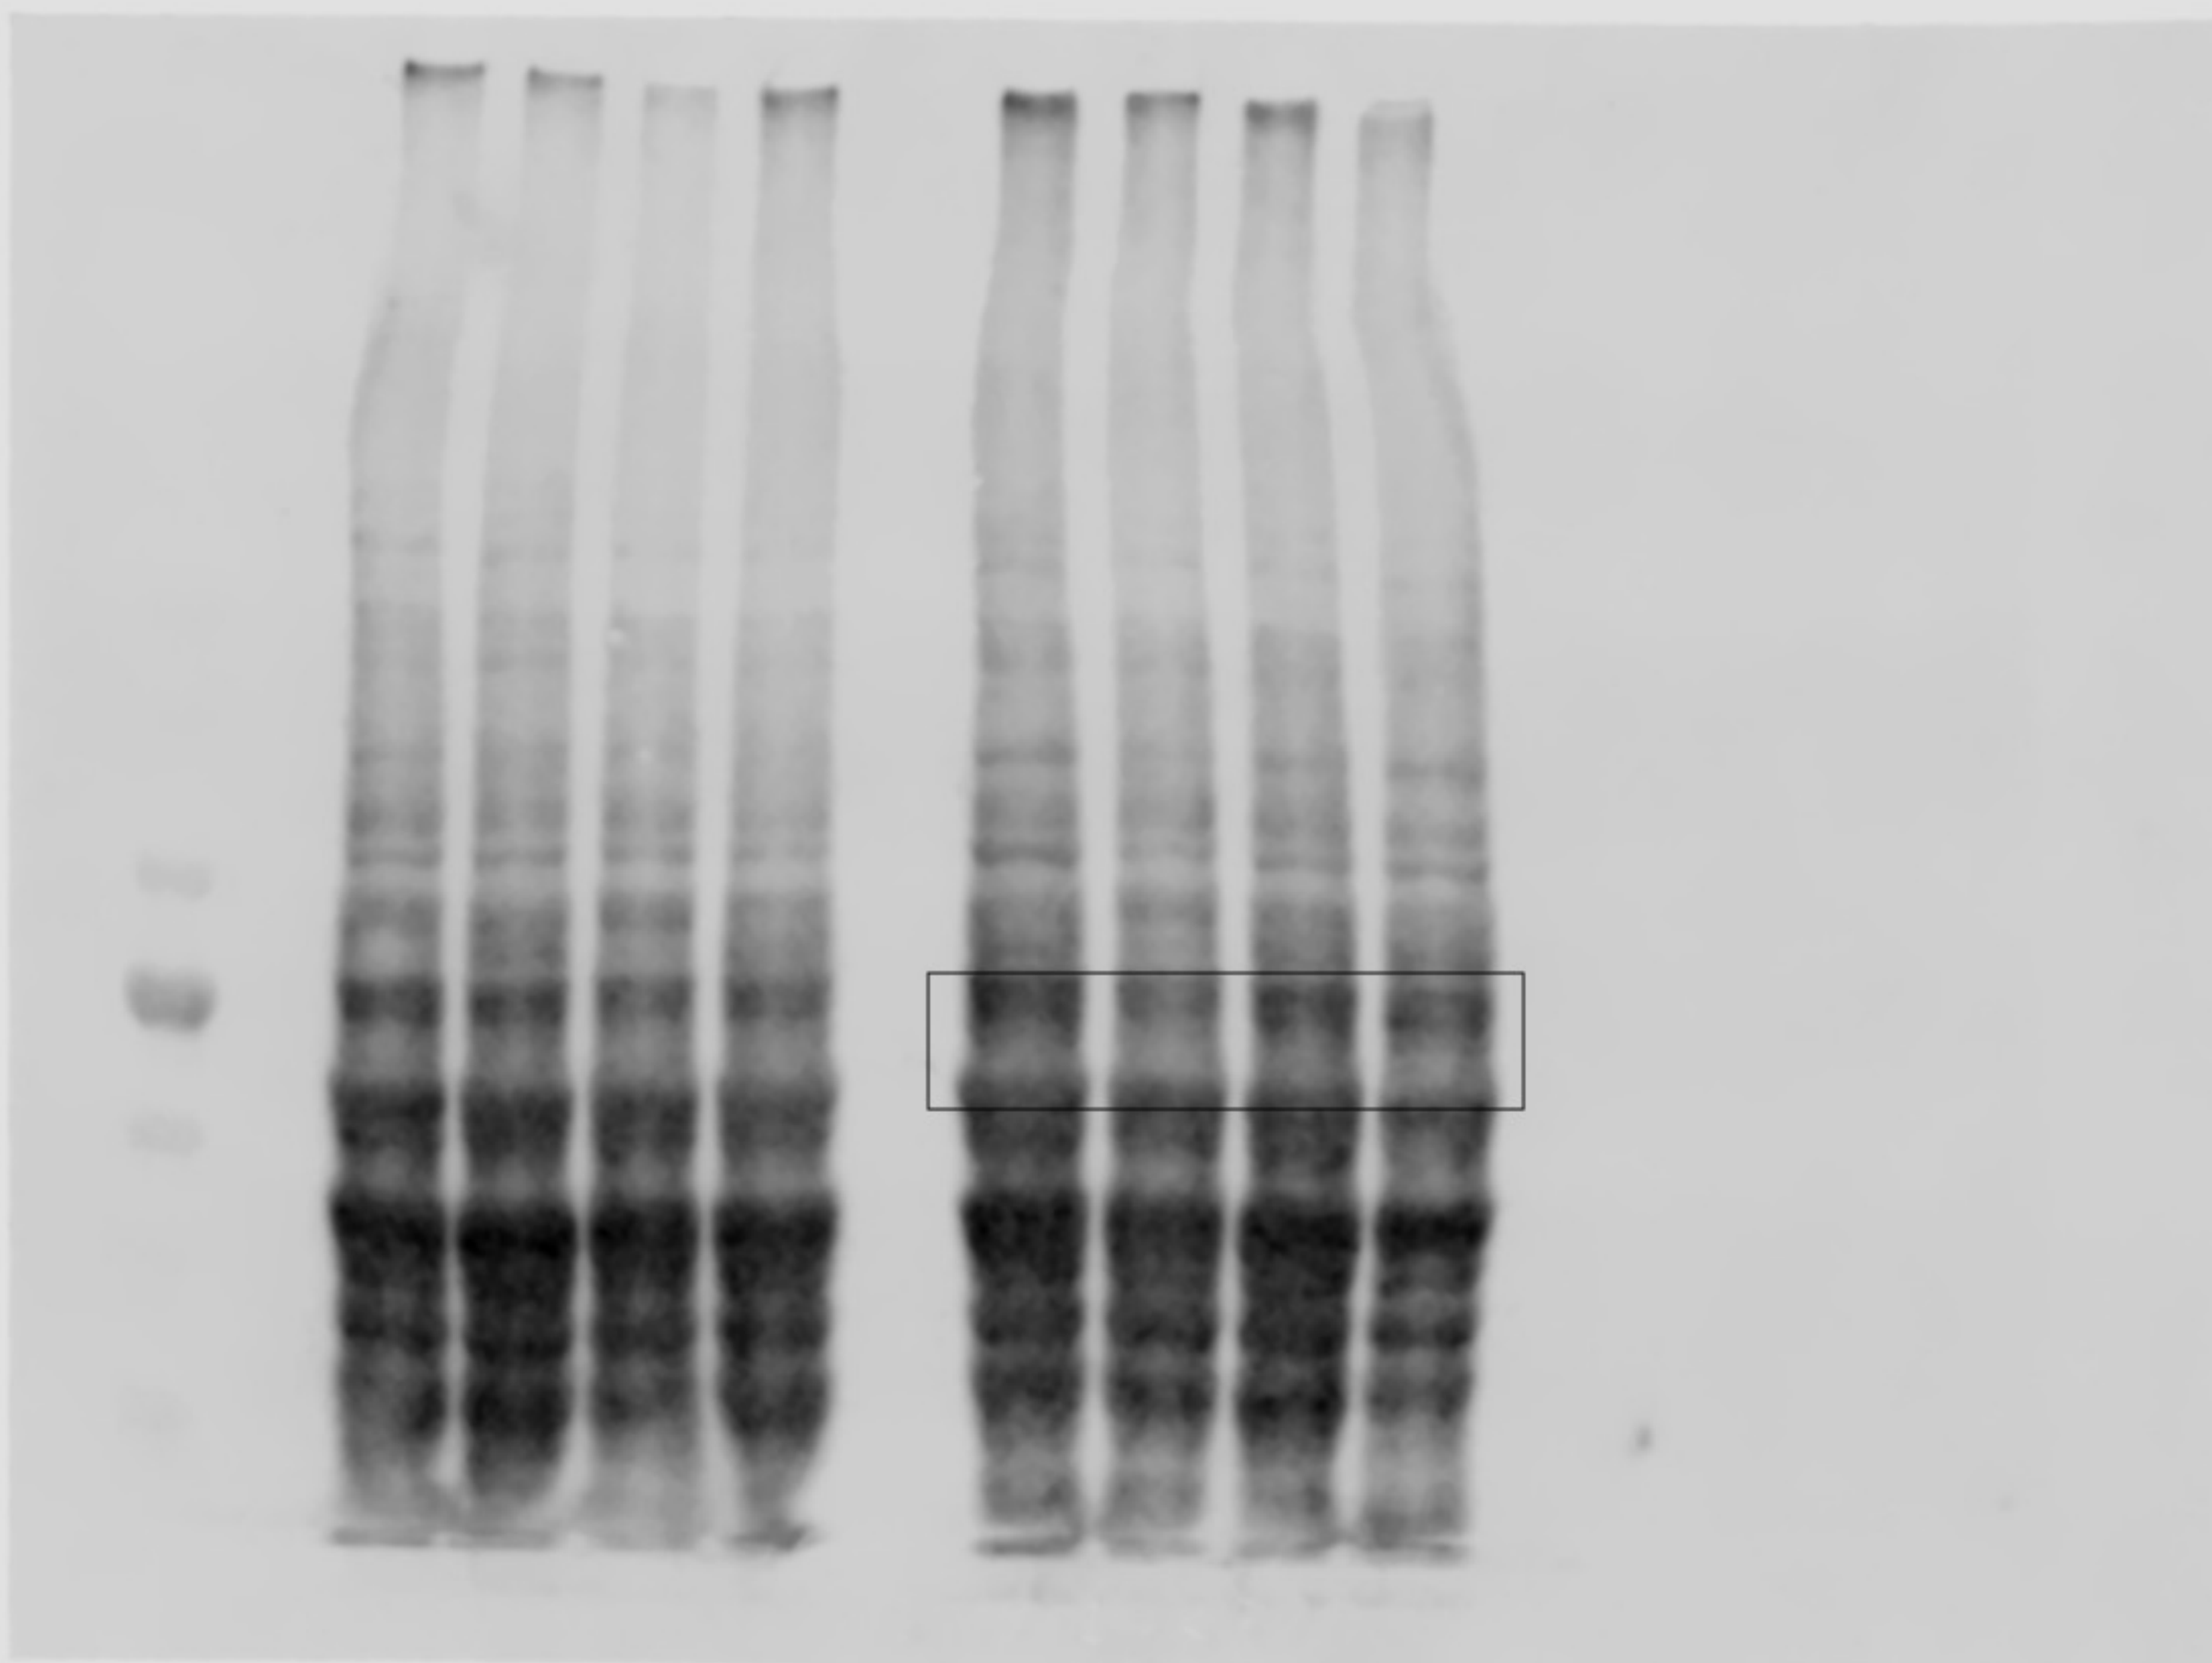

Cropped area for Figure 2G  
Total Protein Stain

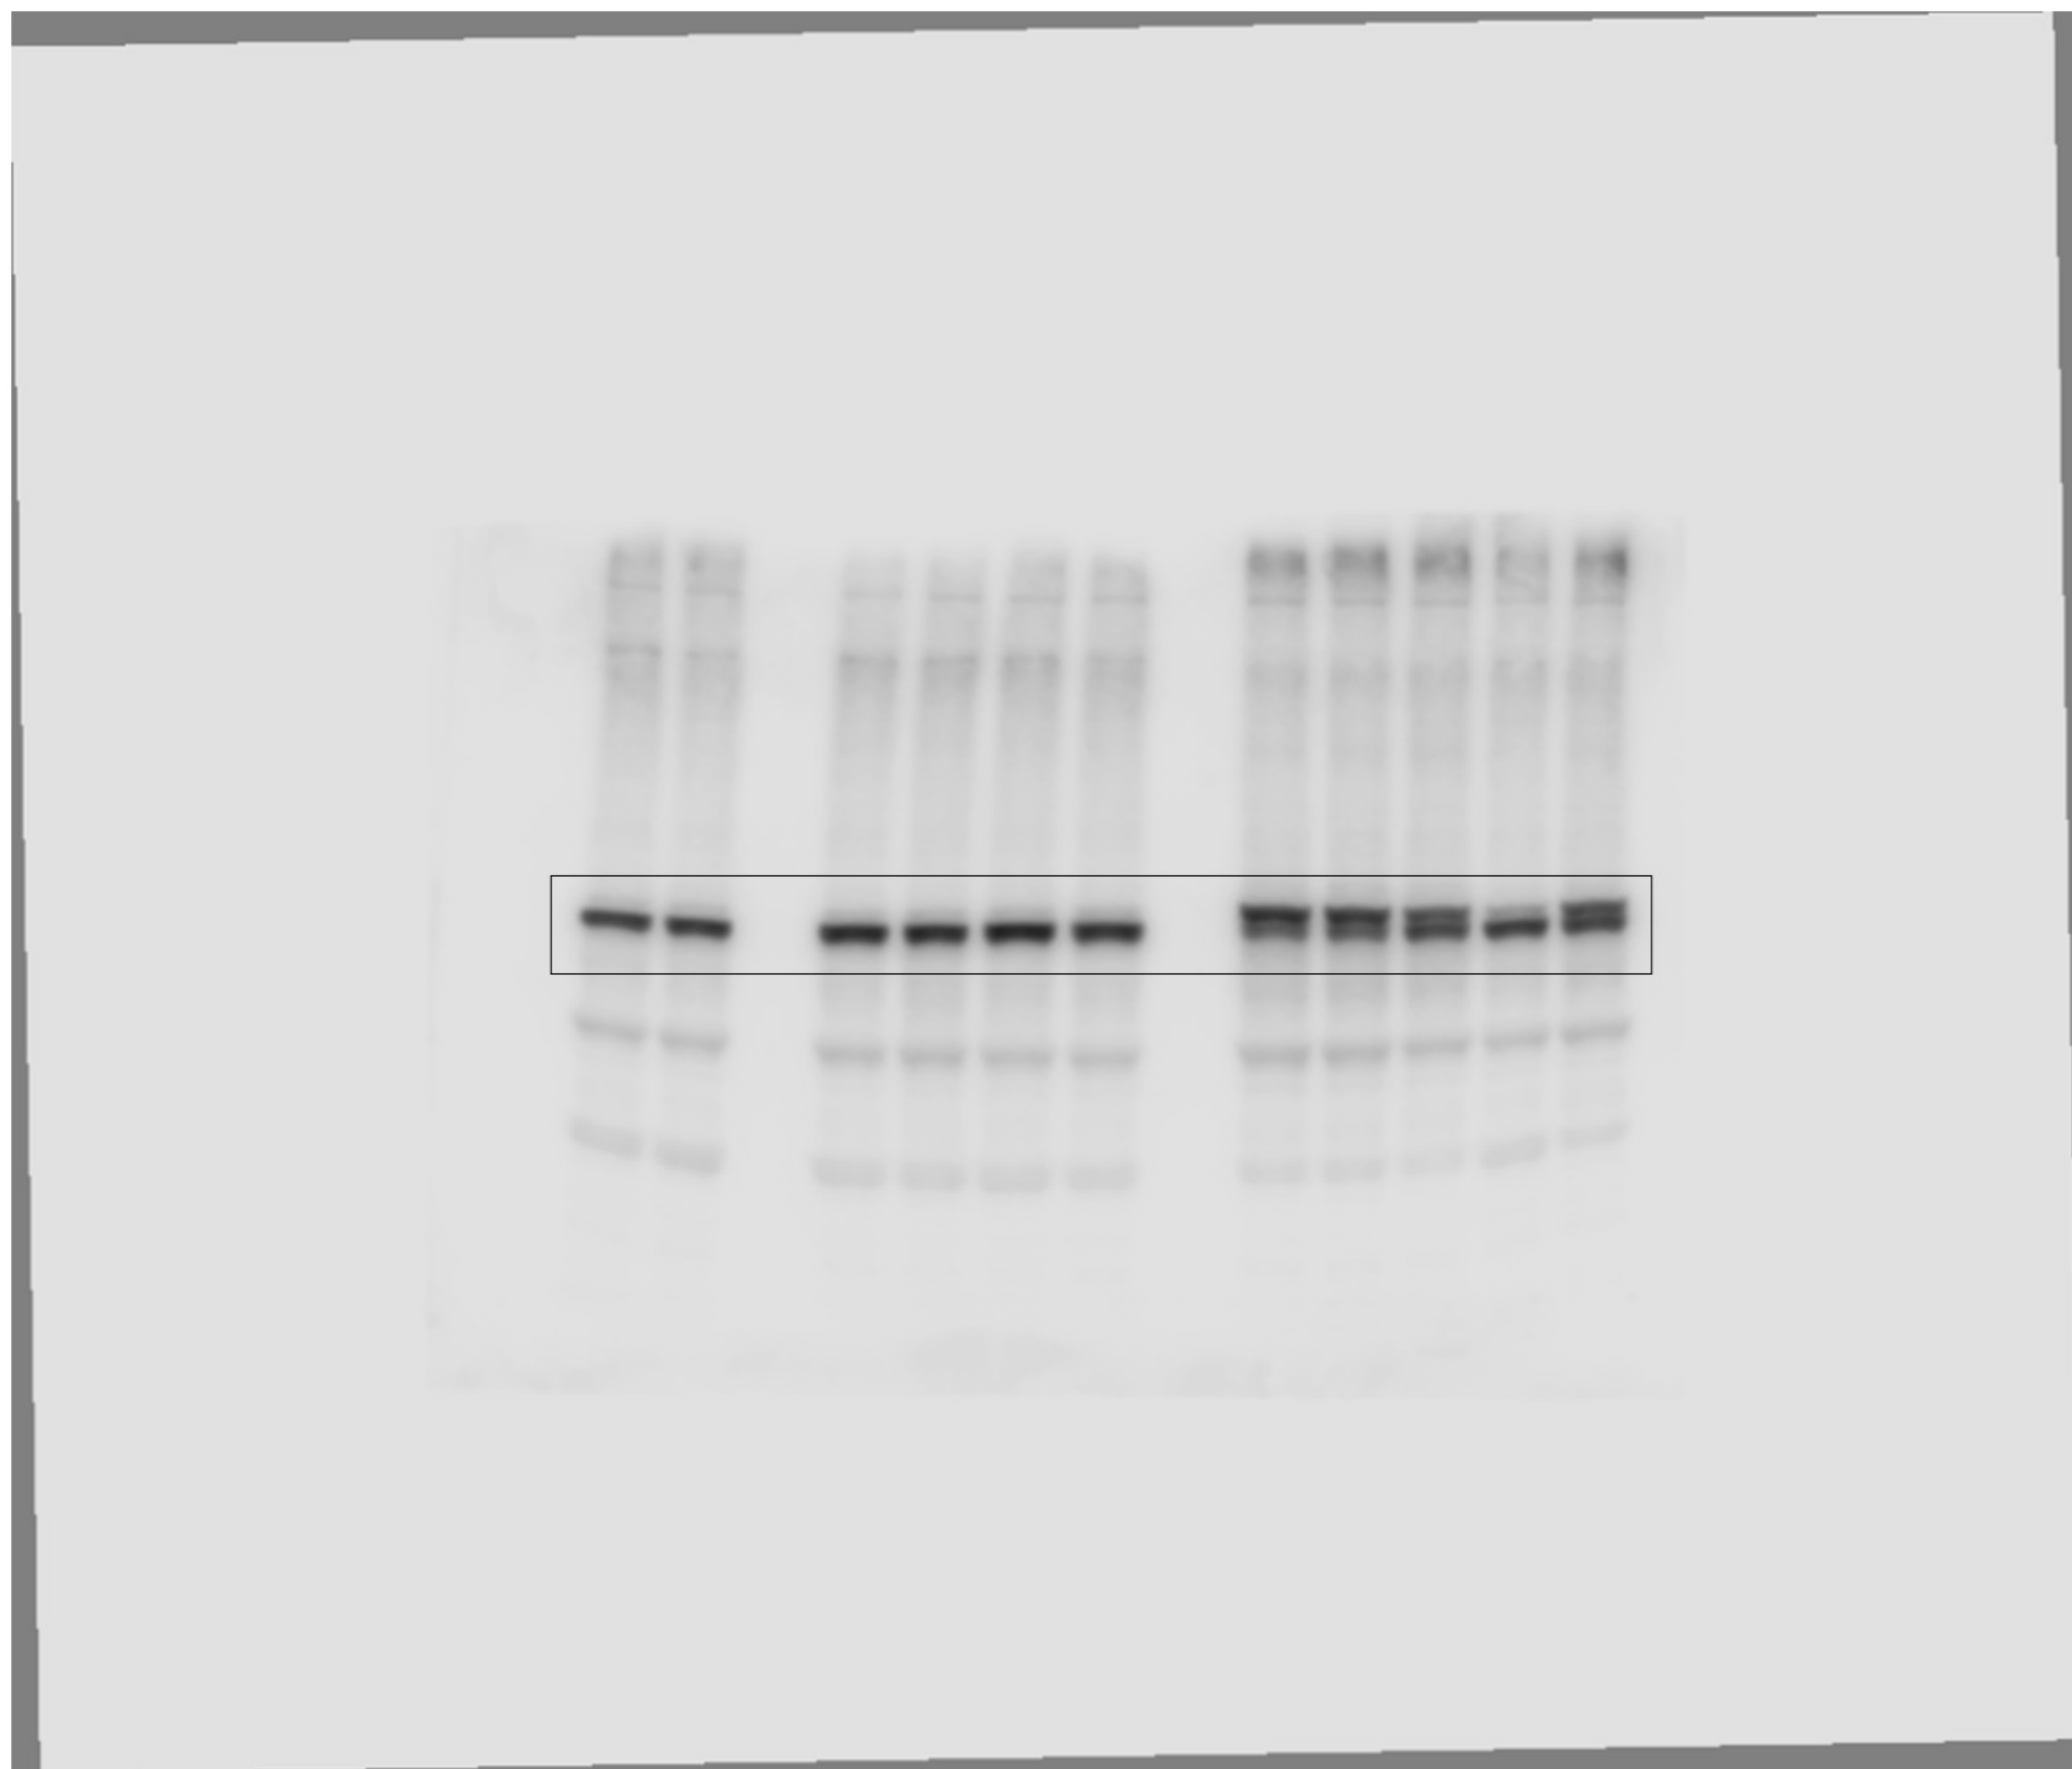

Cropped area for Figure 2H  
Hsp60

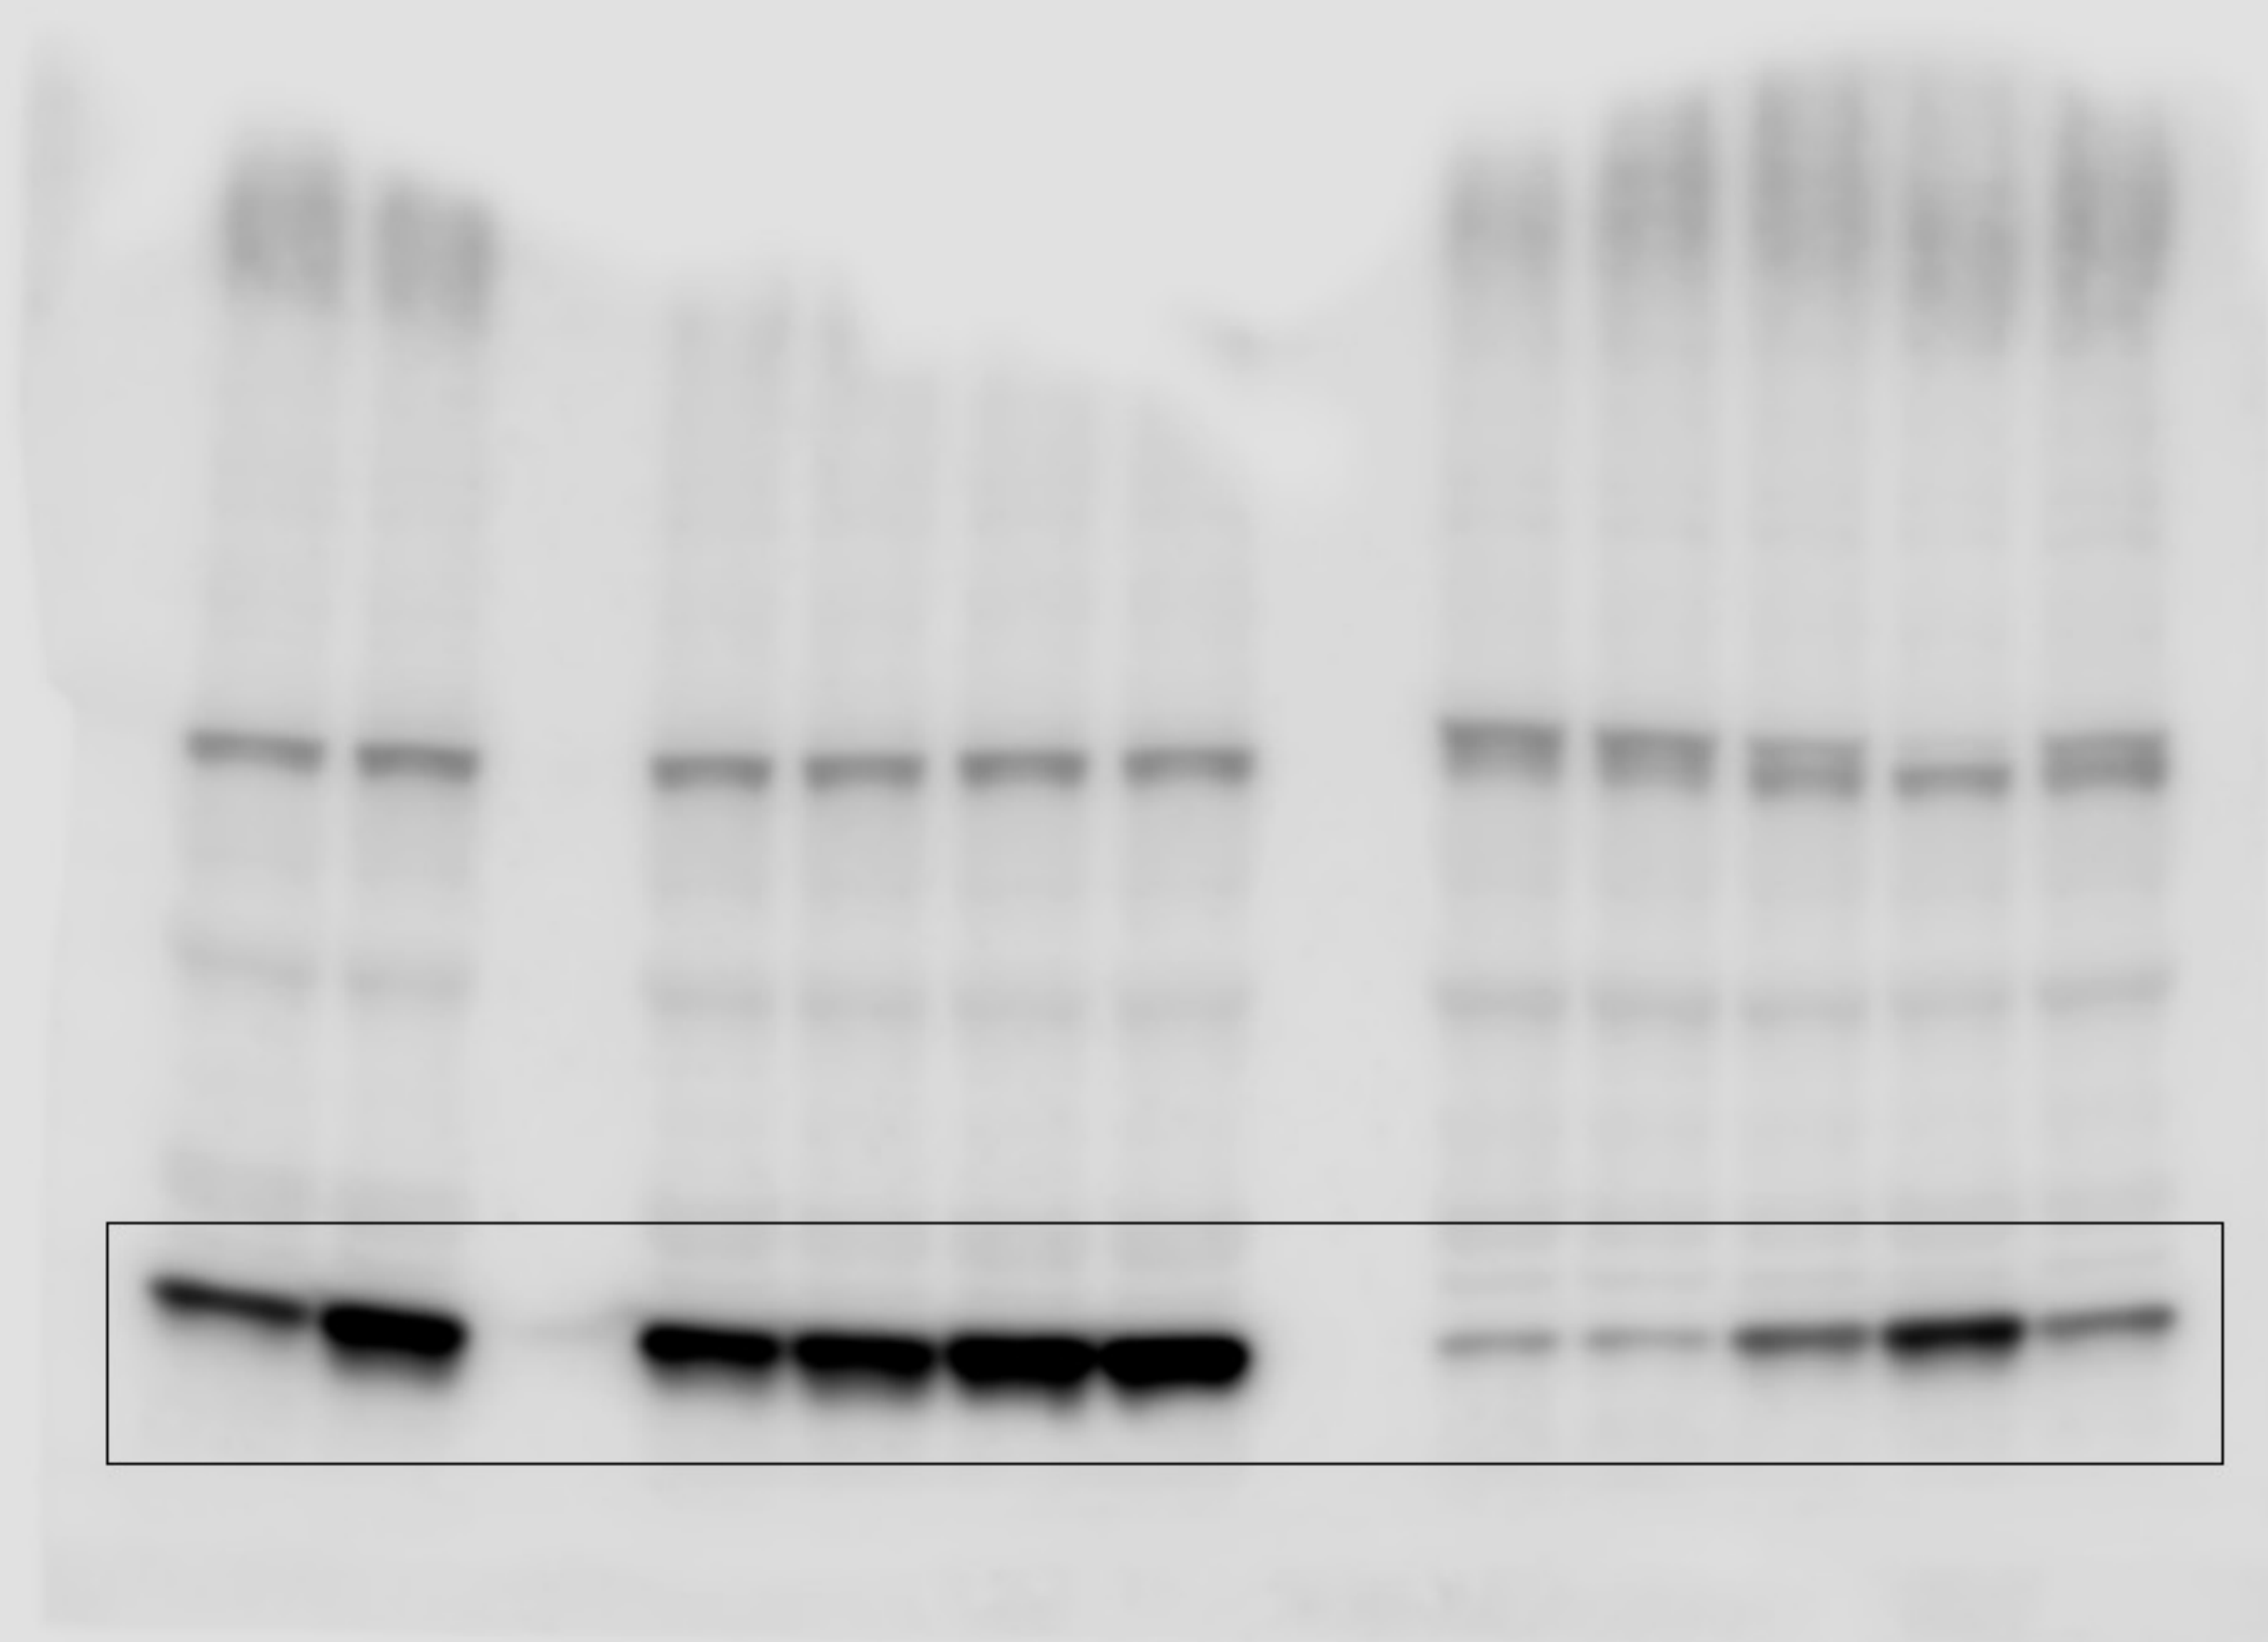

Cropped area for Figure 2H  
Aac2

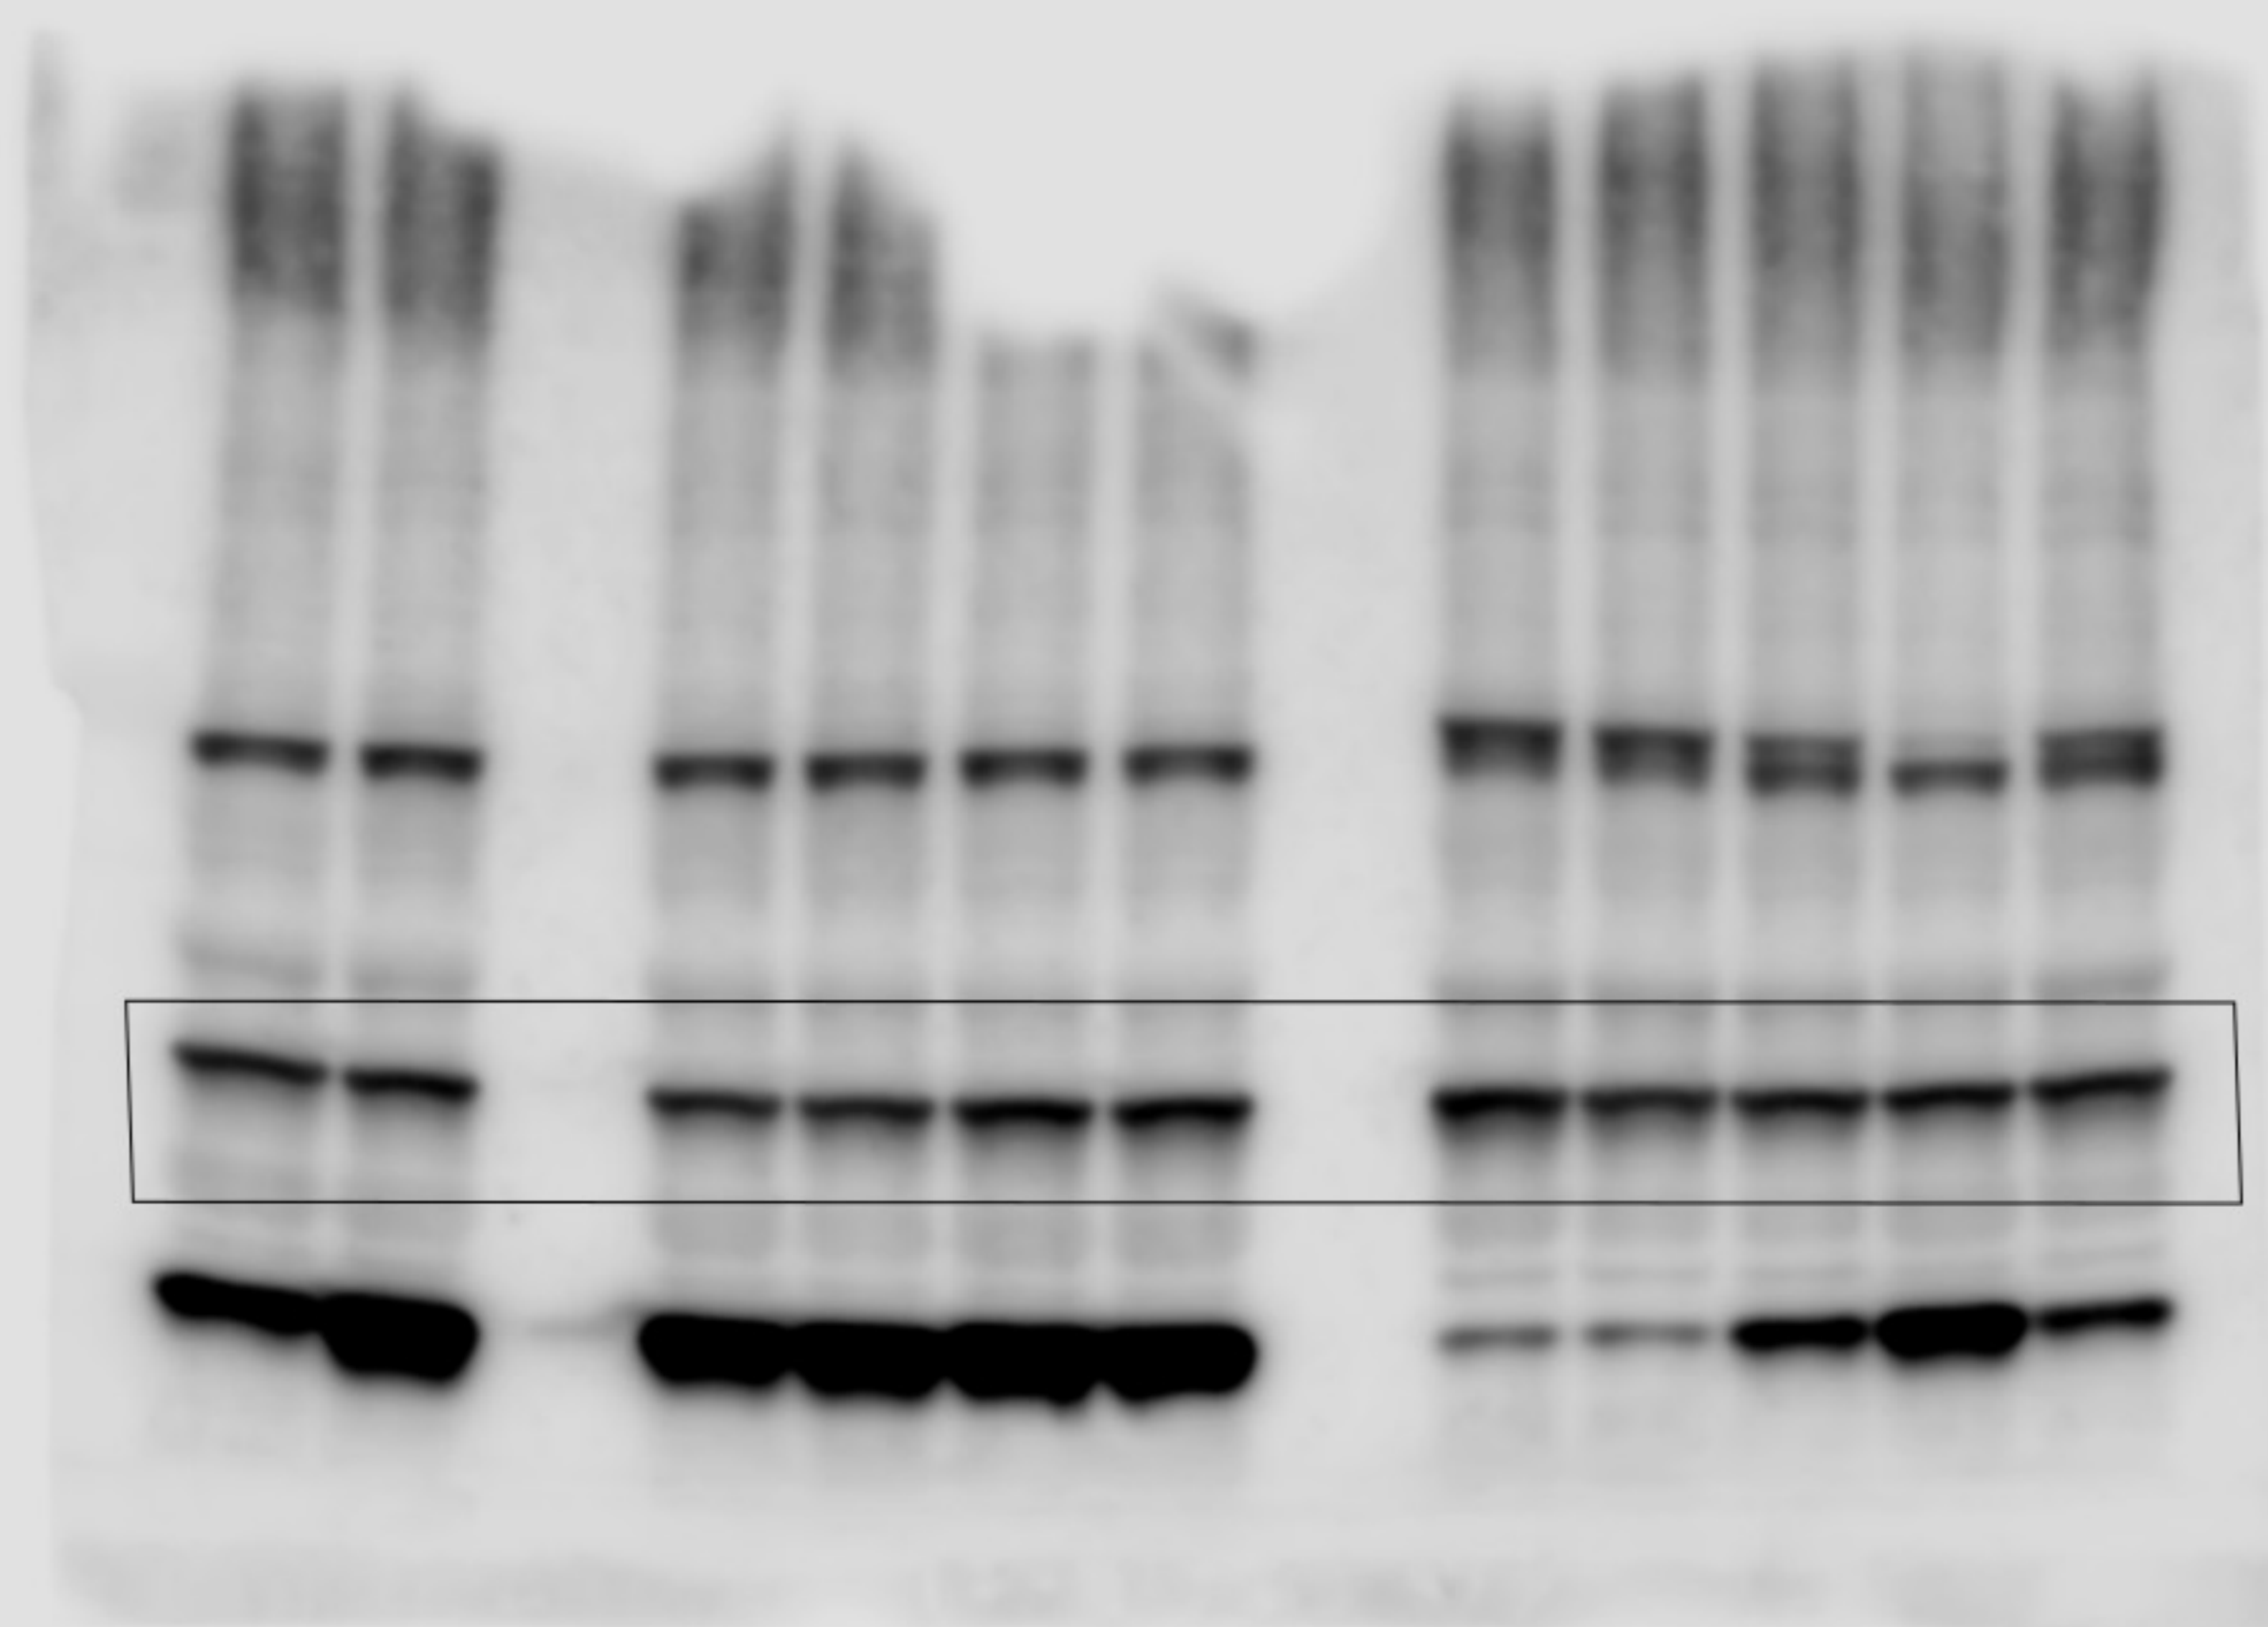

Cropped area for Figure 2H  
Ilv5



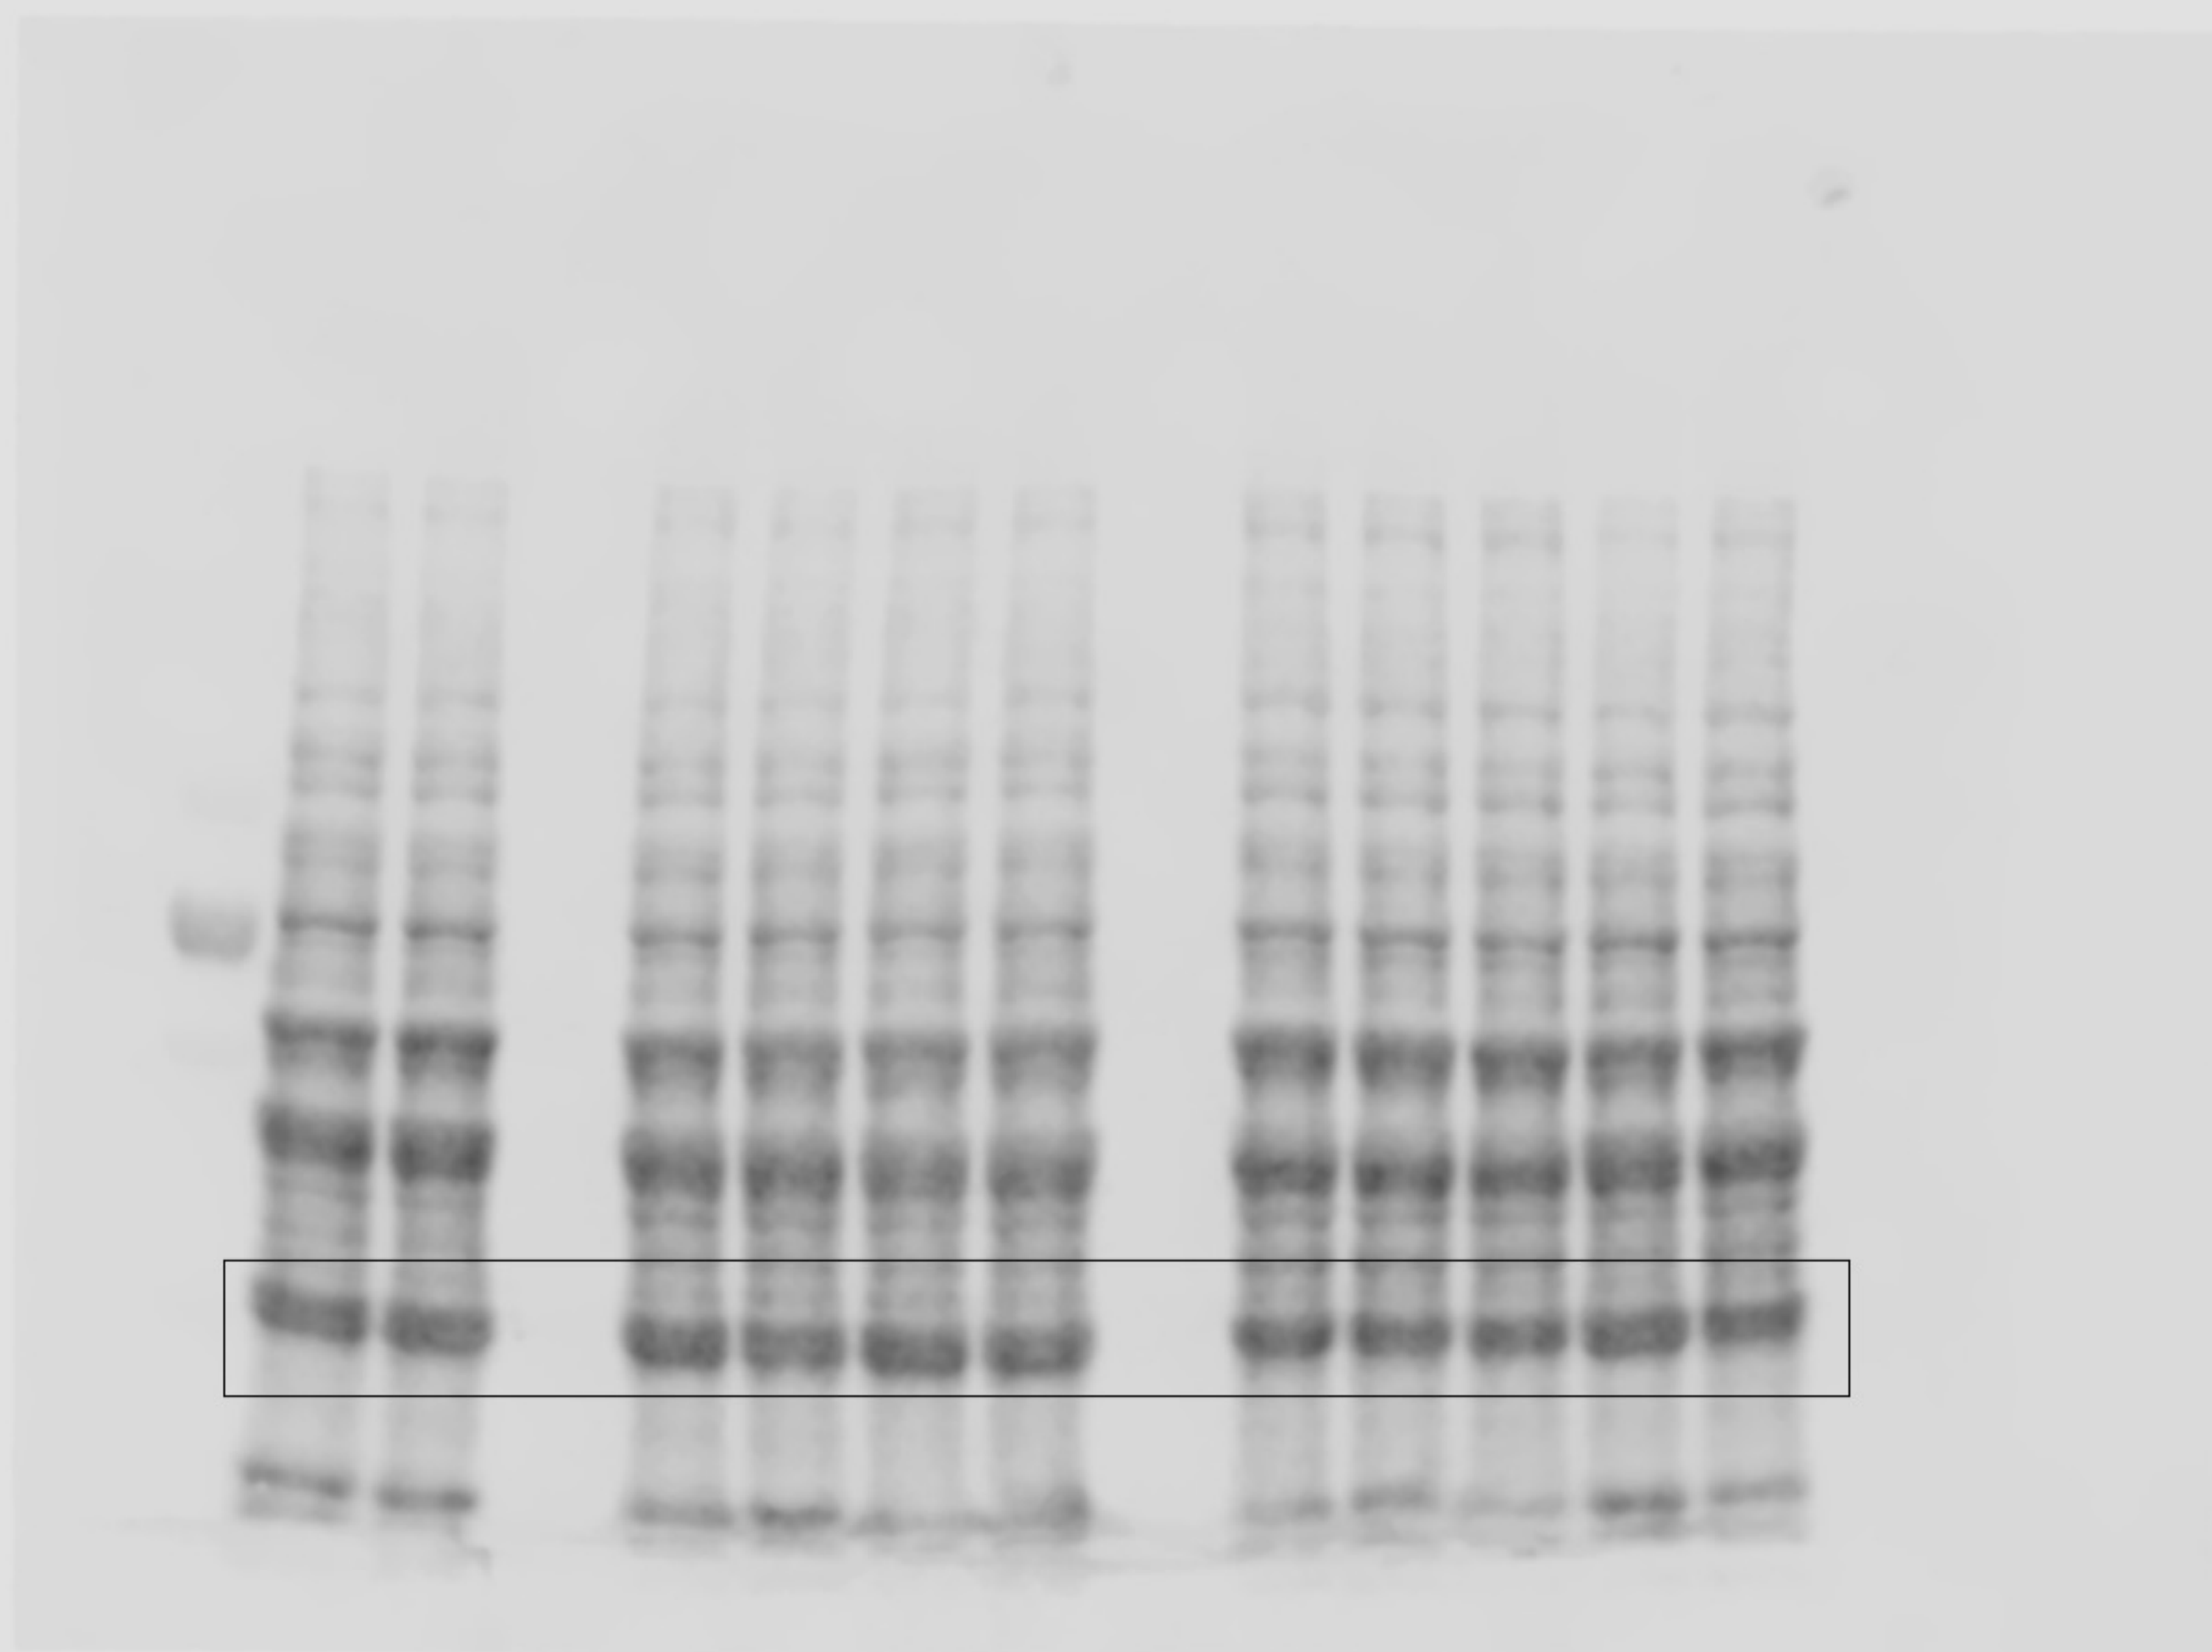

Cropped area for Figure 2H  
Total Protein Stain
