# Supplementary material for: Mitochondrial protein import clogging as a mechanism of disease
Source: eLife journal article supplement (doi:10.7554/elife.84330), 2023-05-02
Supplement: fig2-figsupp1-data1 [file Figure 2-figure supplement 1-source data 1_annotated.pdf › Figure 2-figure supplement 1-source data 1/Figure 2-figure supplement 1-source data 1_annotated.pdf]

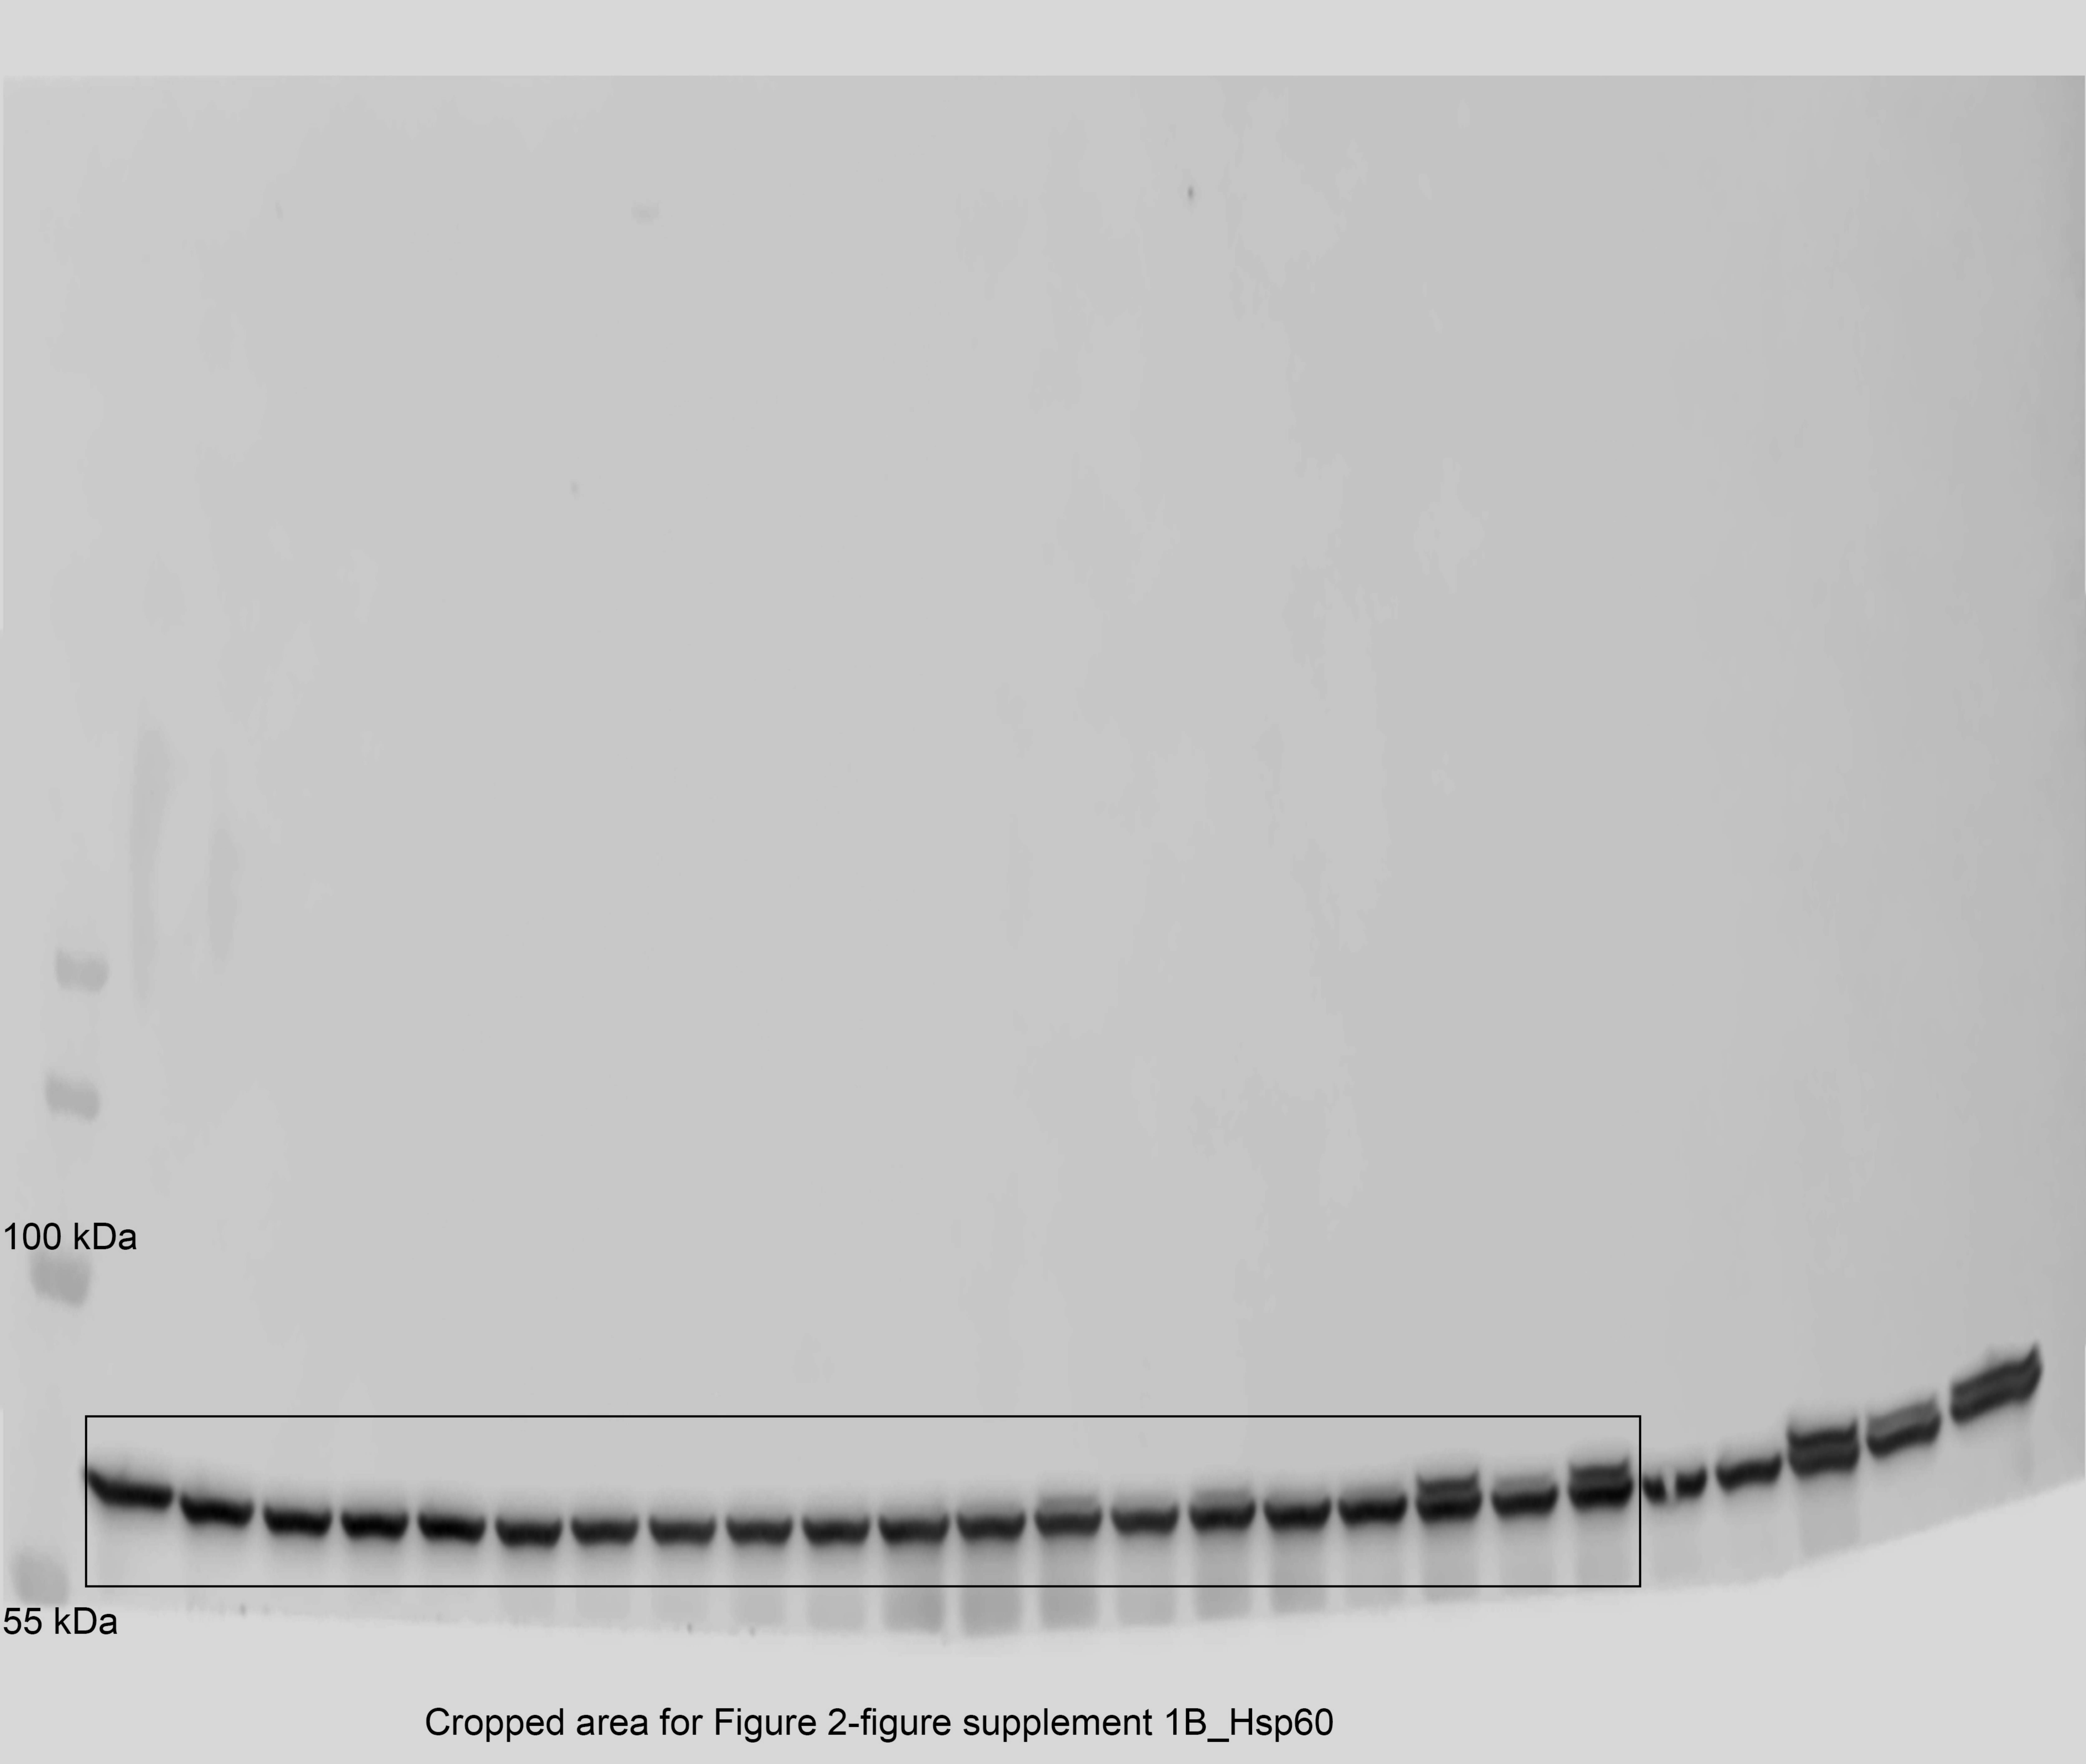

100 kDa

55 kDa

Cropped area for Figure 2-figure supplement 1B\_Hsp60

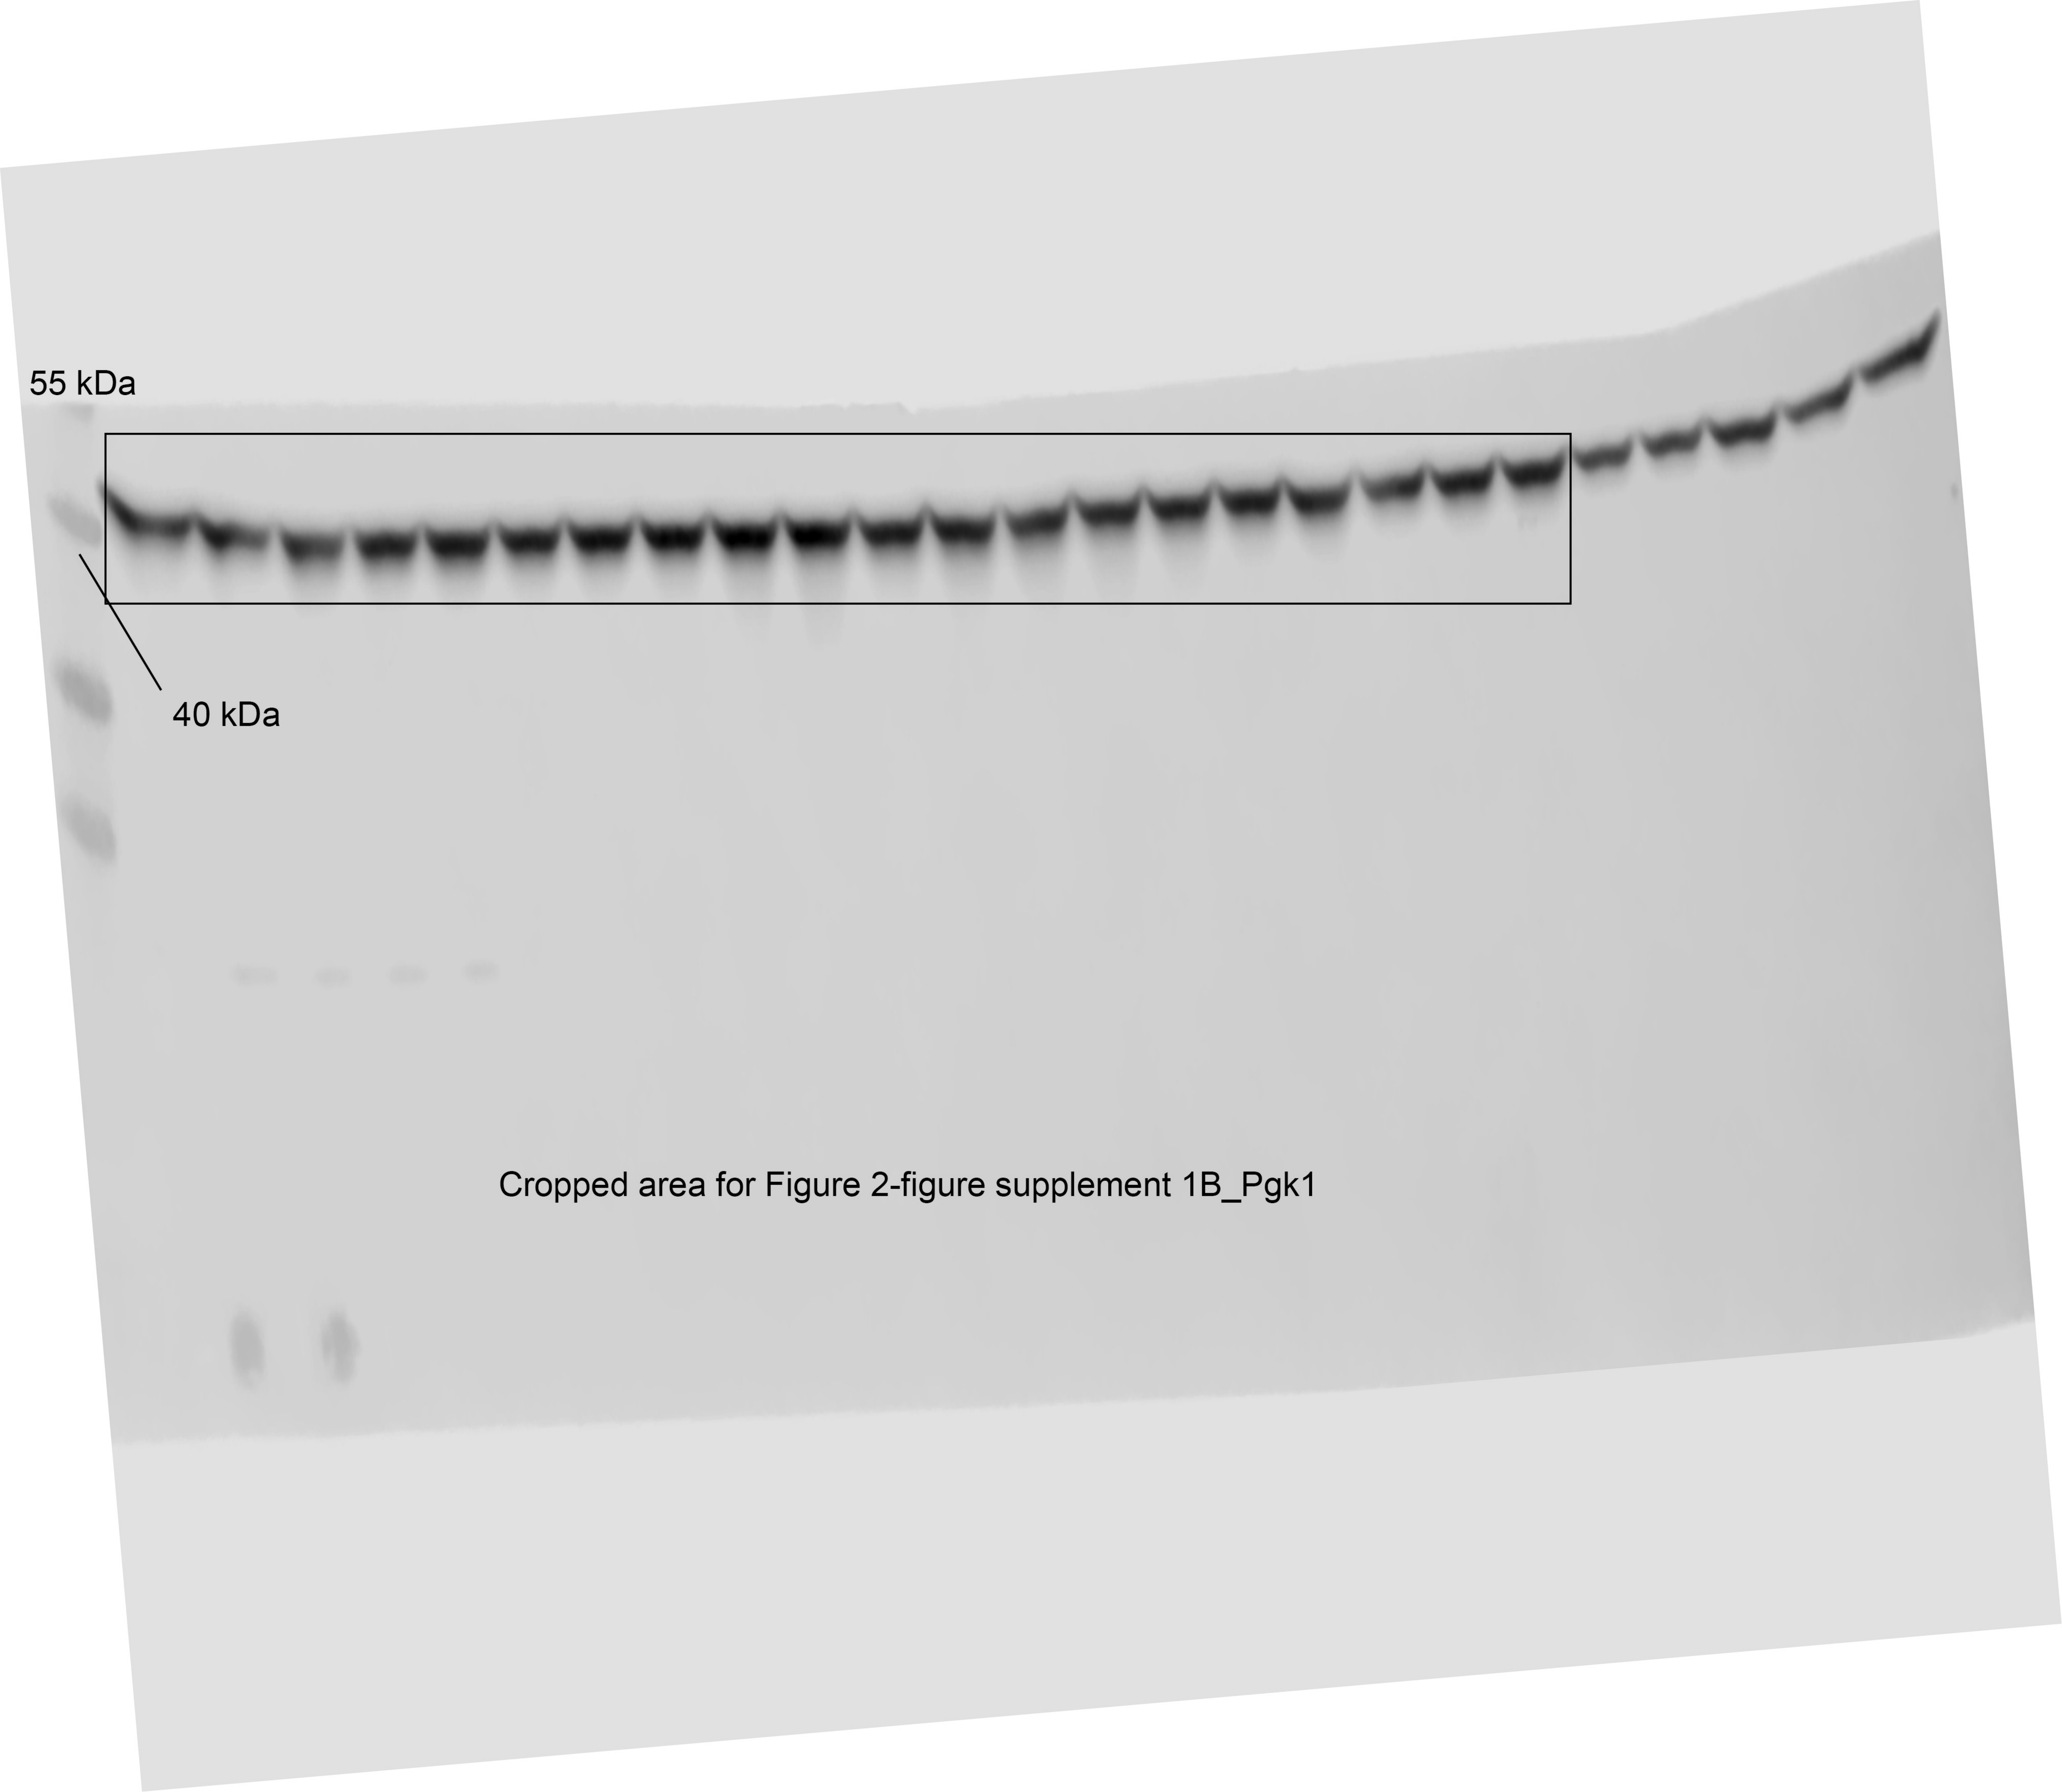

55 kDa

40 kDa

Cropped area for Figure 2-figure supplement 1B\_Pgk1

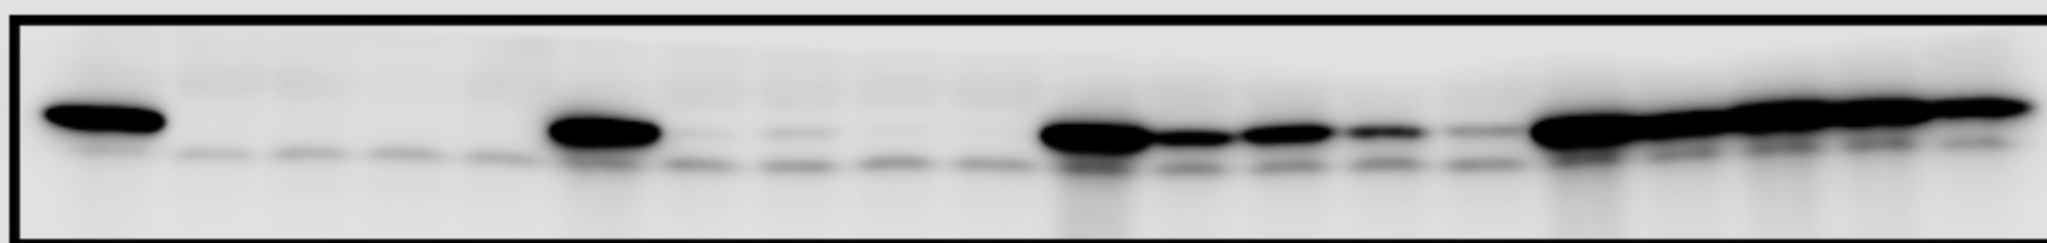

Cropped area for Figure 2-figure supplement 1C\_Aac2

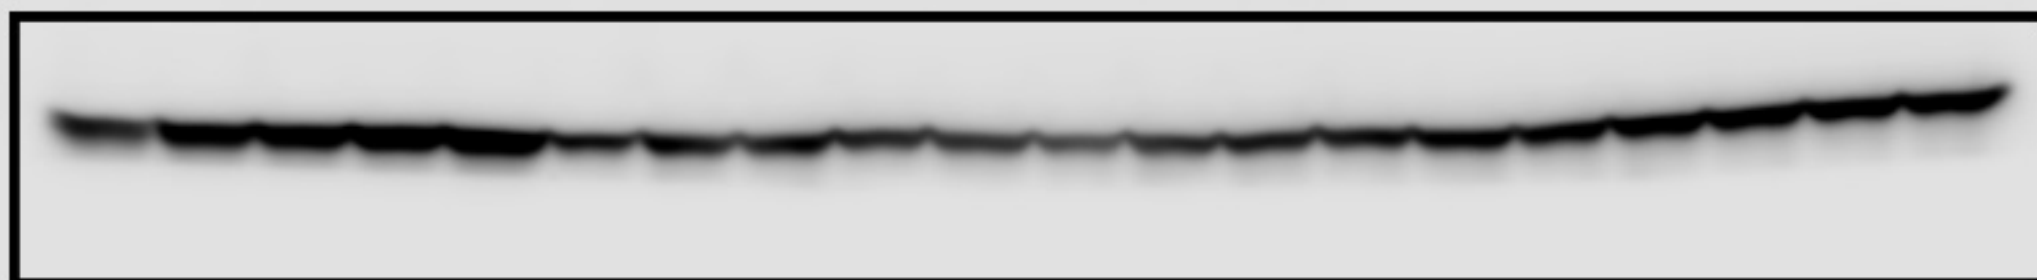

Cropped area for Figure 2-figure supplement 1C\_Pgk1
