# Supplementary material for: Mitochondrial protein import clogging as a mechanism of disease
Source: eLife journal article supplement (doi:10.7554/elife.84330), 2023-05-02
Supplement: fig3-data1 [file elife-84330-fig3-data1-v2.zip]

Cropped area for Figure 3A\_Aac2

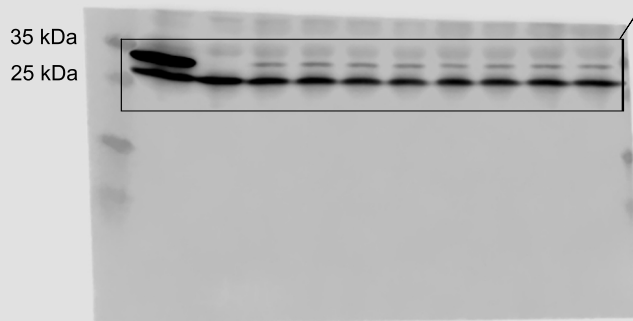

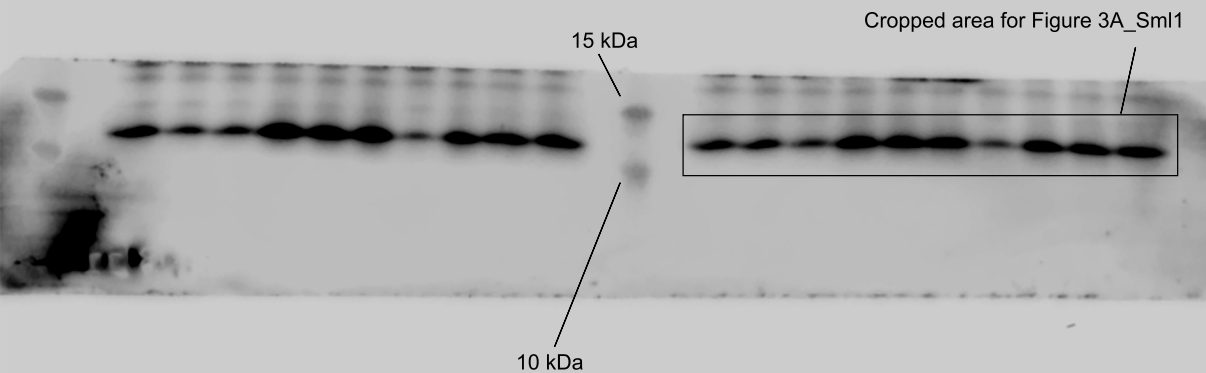

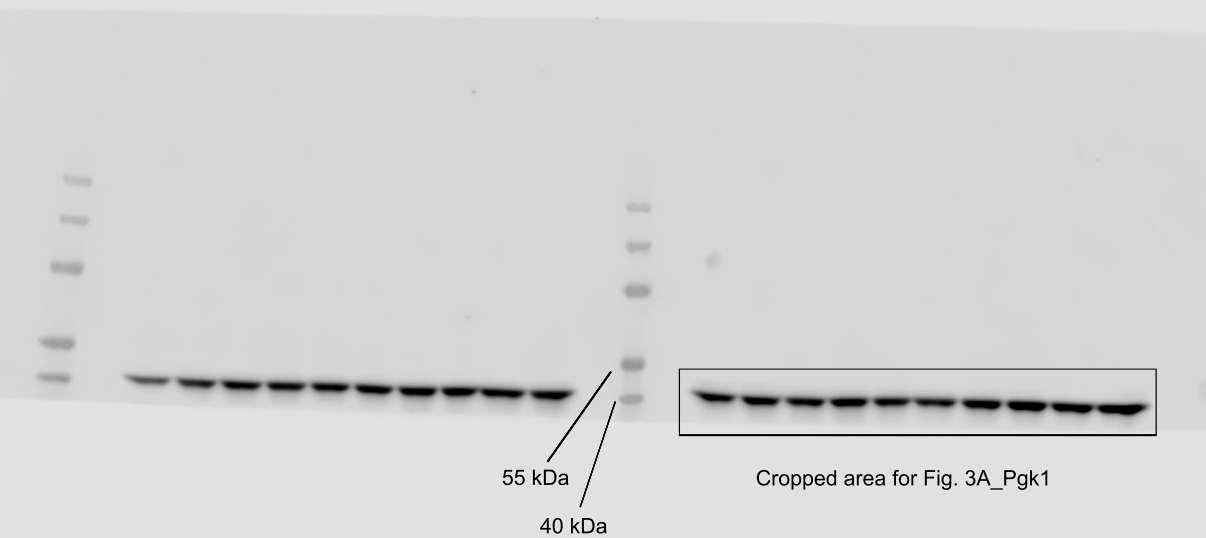

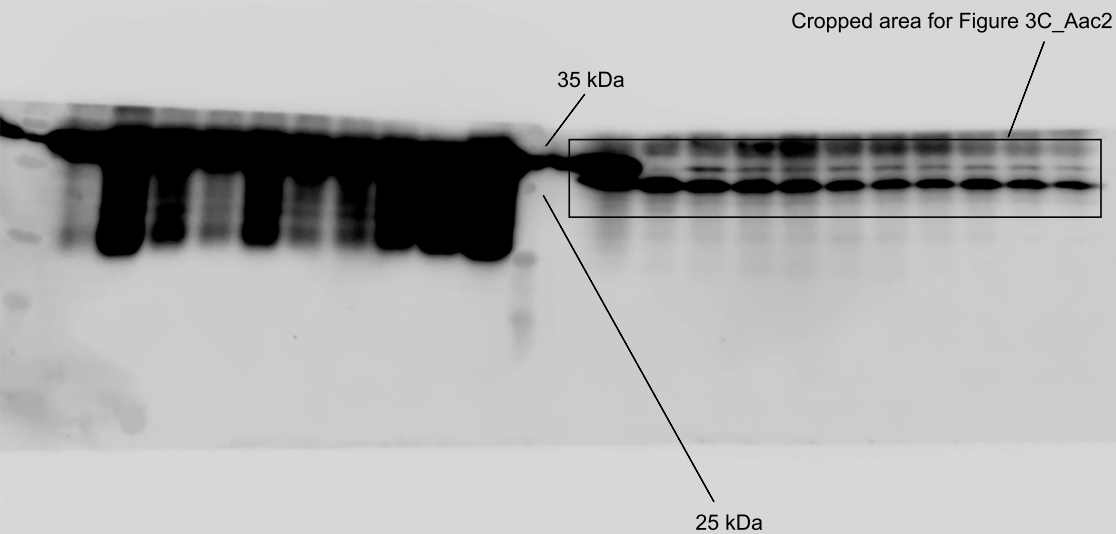





35 kDa

25 kDa

Cropped area for Fig. 3C\_TPS

Cropped area for Figure 3D\_Aac2

35kDa

25kDa

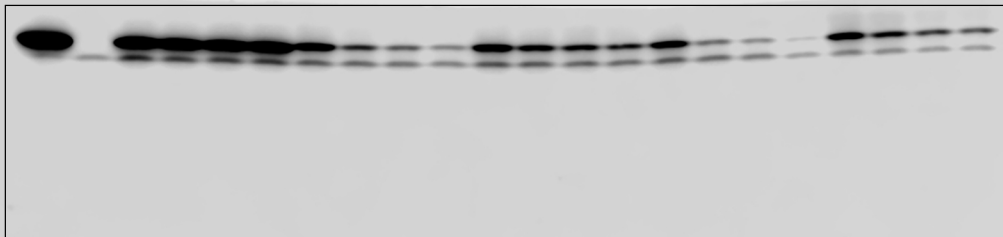

35 kDa  
/  
25kDa

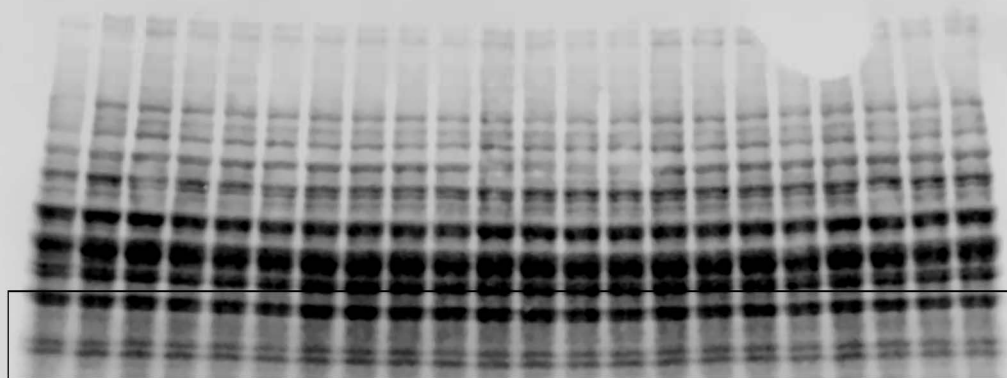

Cropped area for Figure 3D\_Total protein staining
