# Supplementary material for: Mitochondrial protein import clogging as a mechanism of disease
Source: eLife journal article supplement (doi:10.7554/elife.84330), 2023-05-02
Supplement: fig4-figsupp1-data1 [file Figure 4-figure supplement 1_annotated.pdf › Figure 4-figure supplement 1-source data 1/Figure 4-figure supplement 1_annotated.pdf]

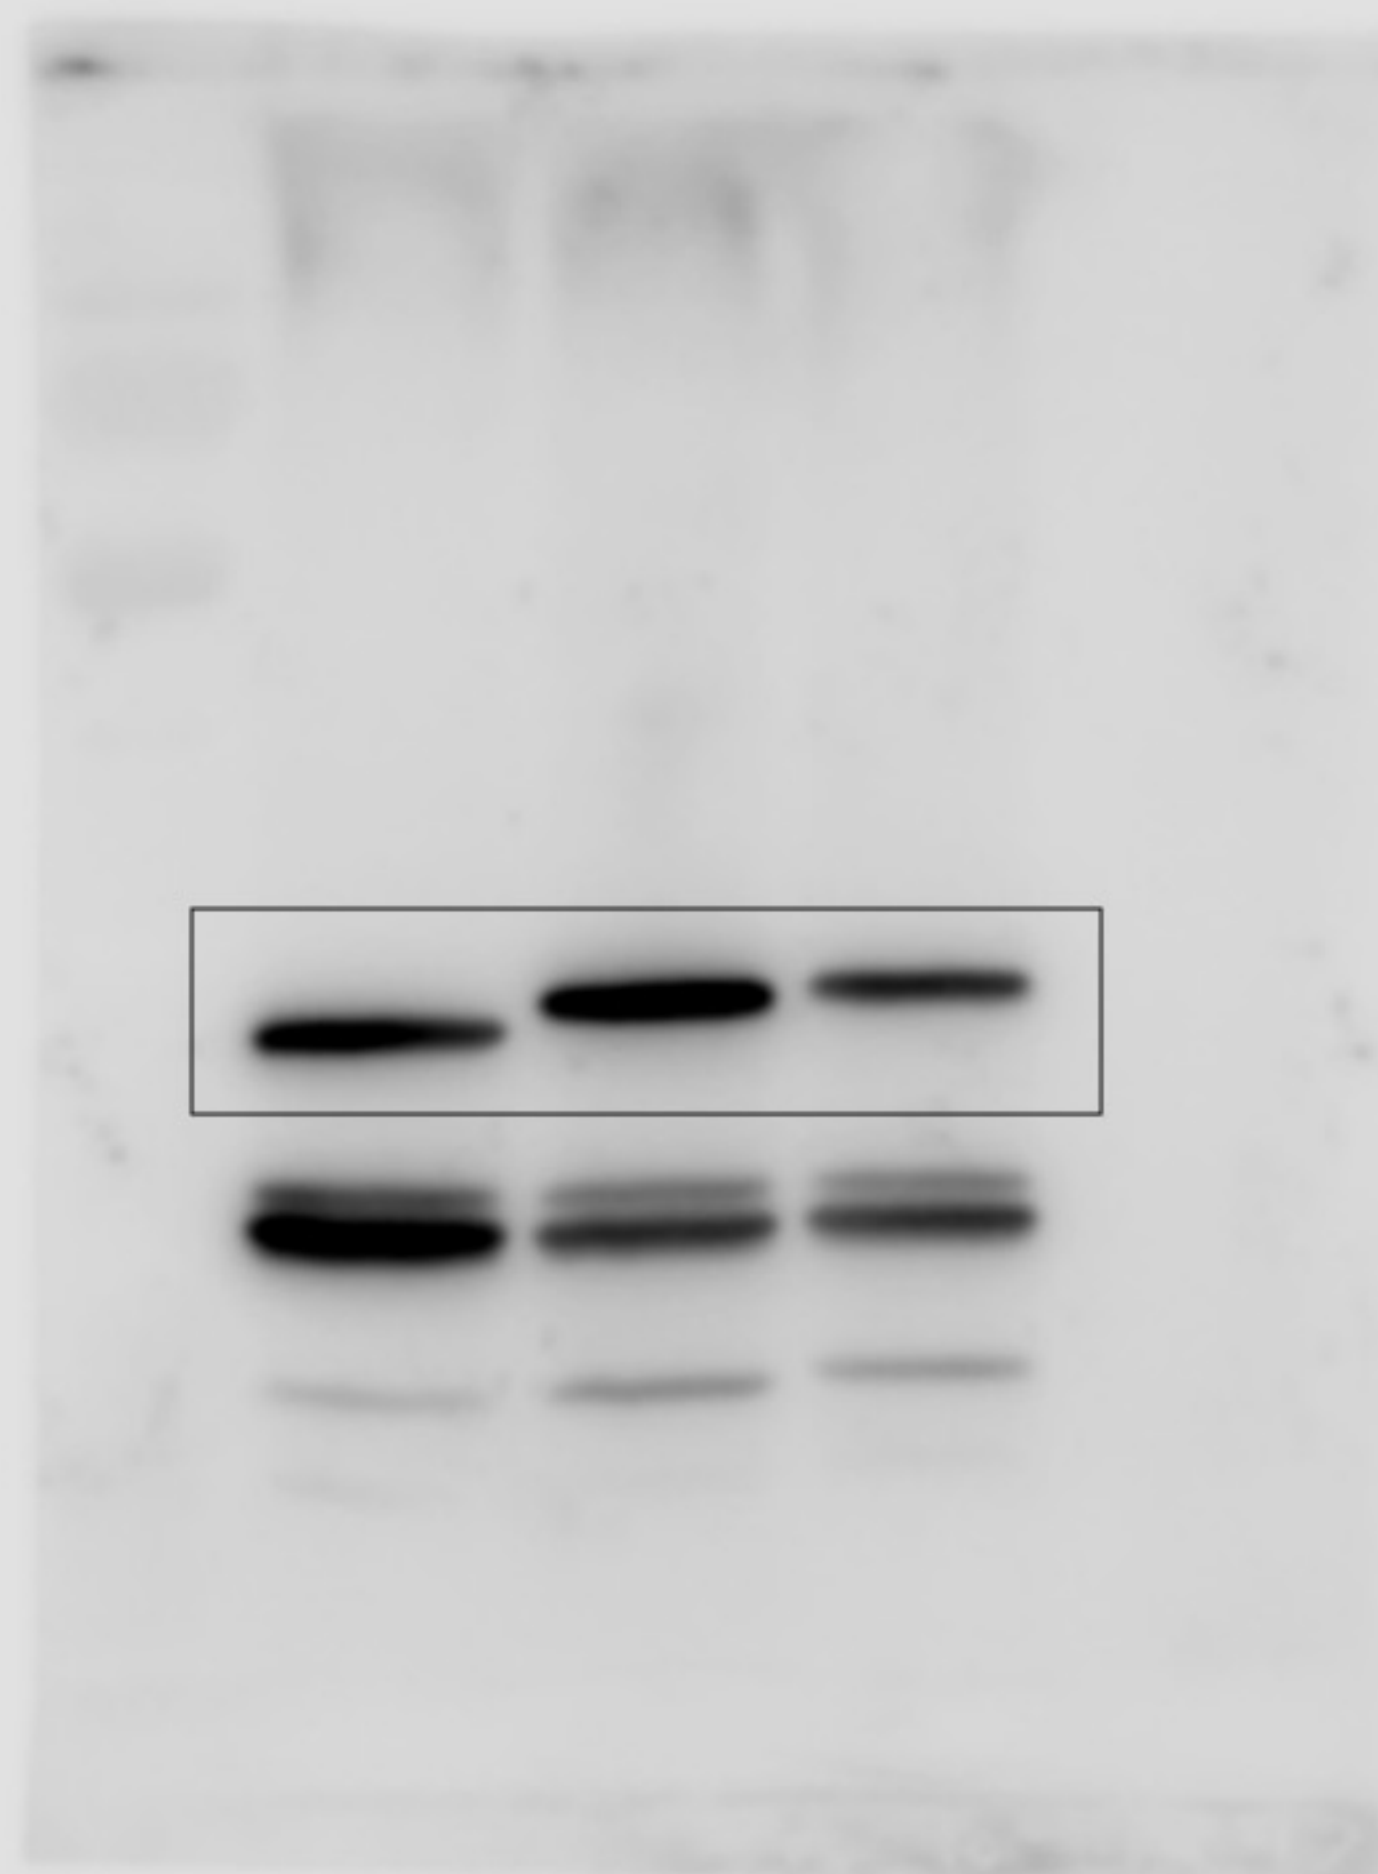

Cropped are for Figure 4-figure supplement 1A  
Aac2

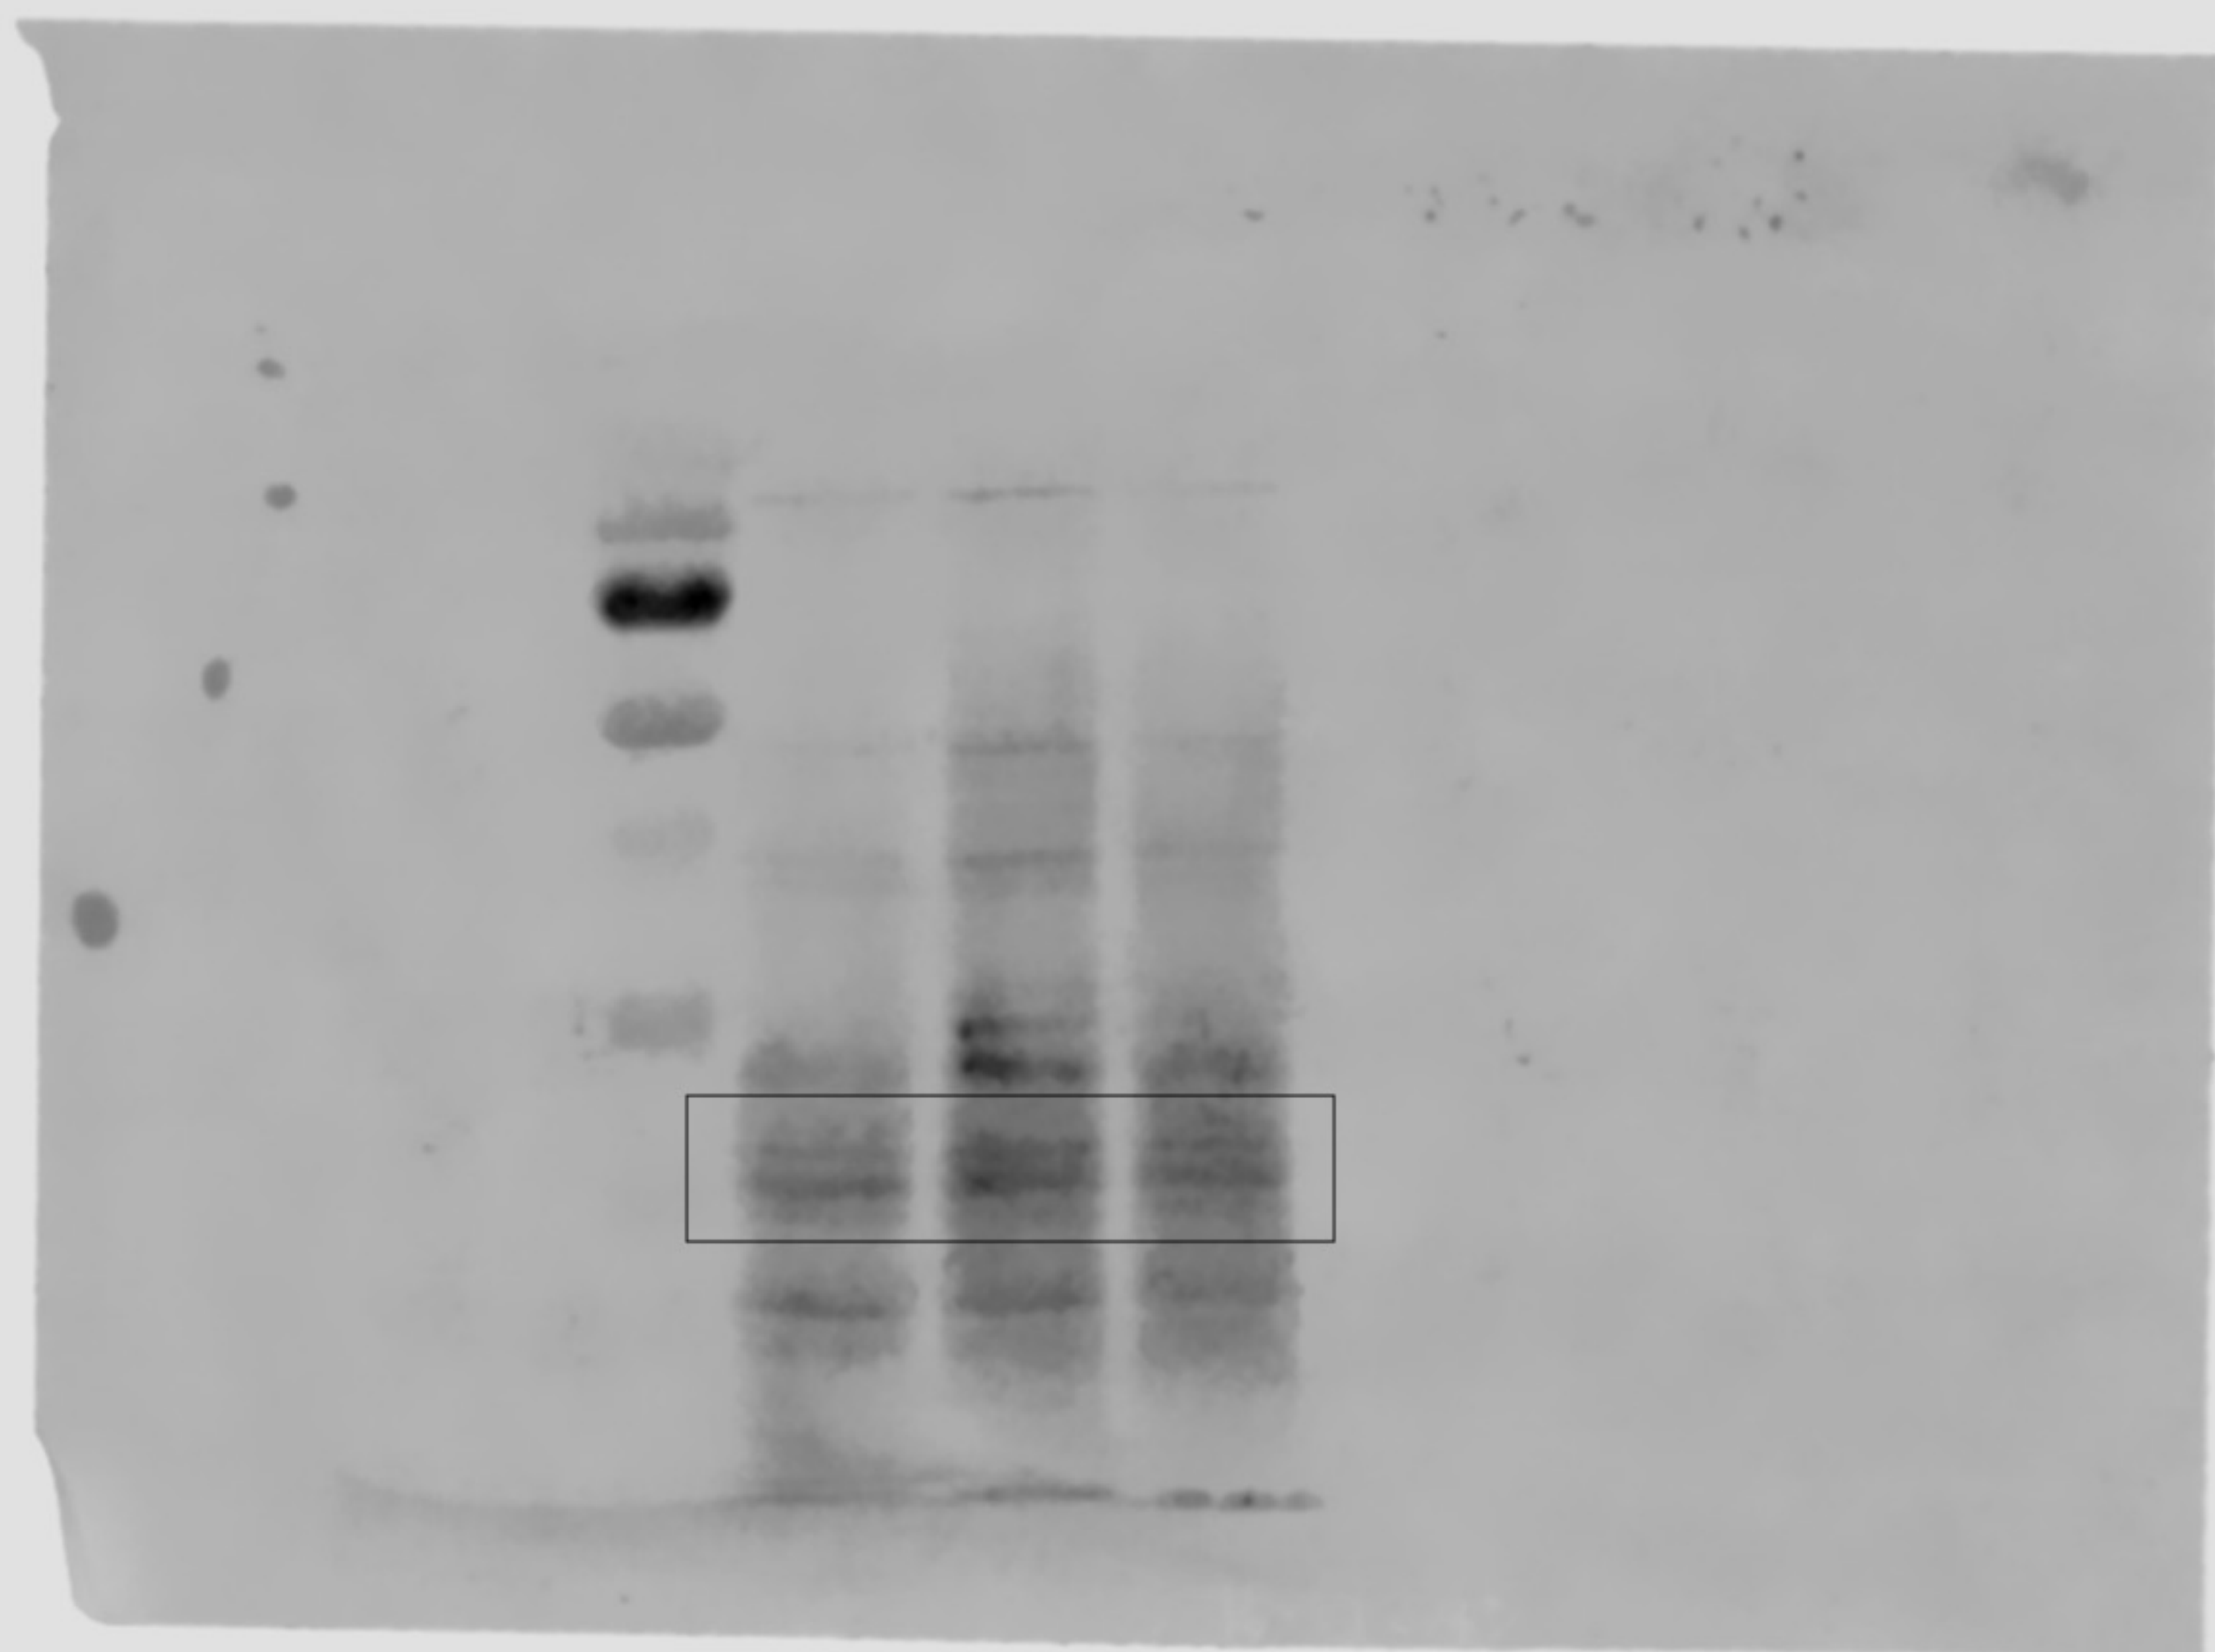

Cropped area for Figure 4-figure supplement 1A  
Total Protein Stain

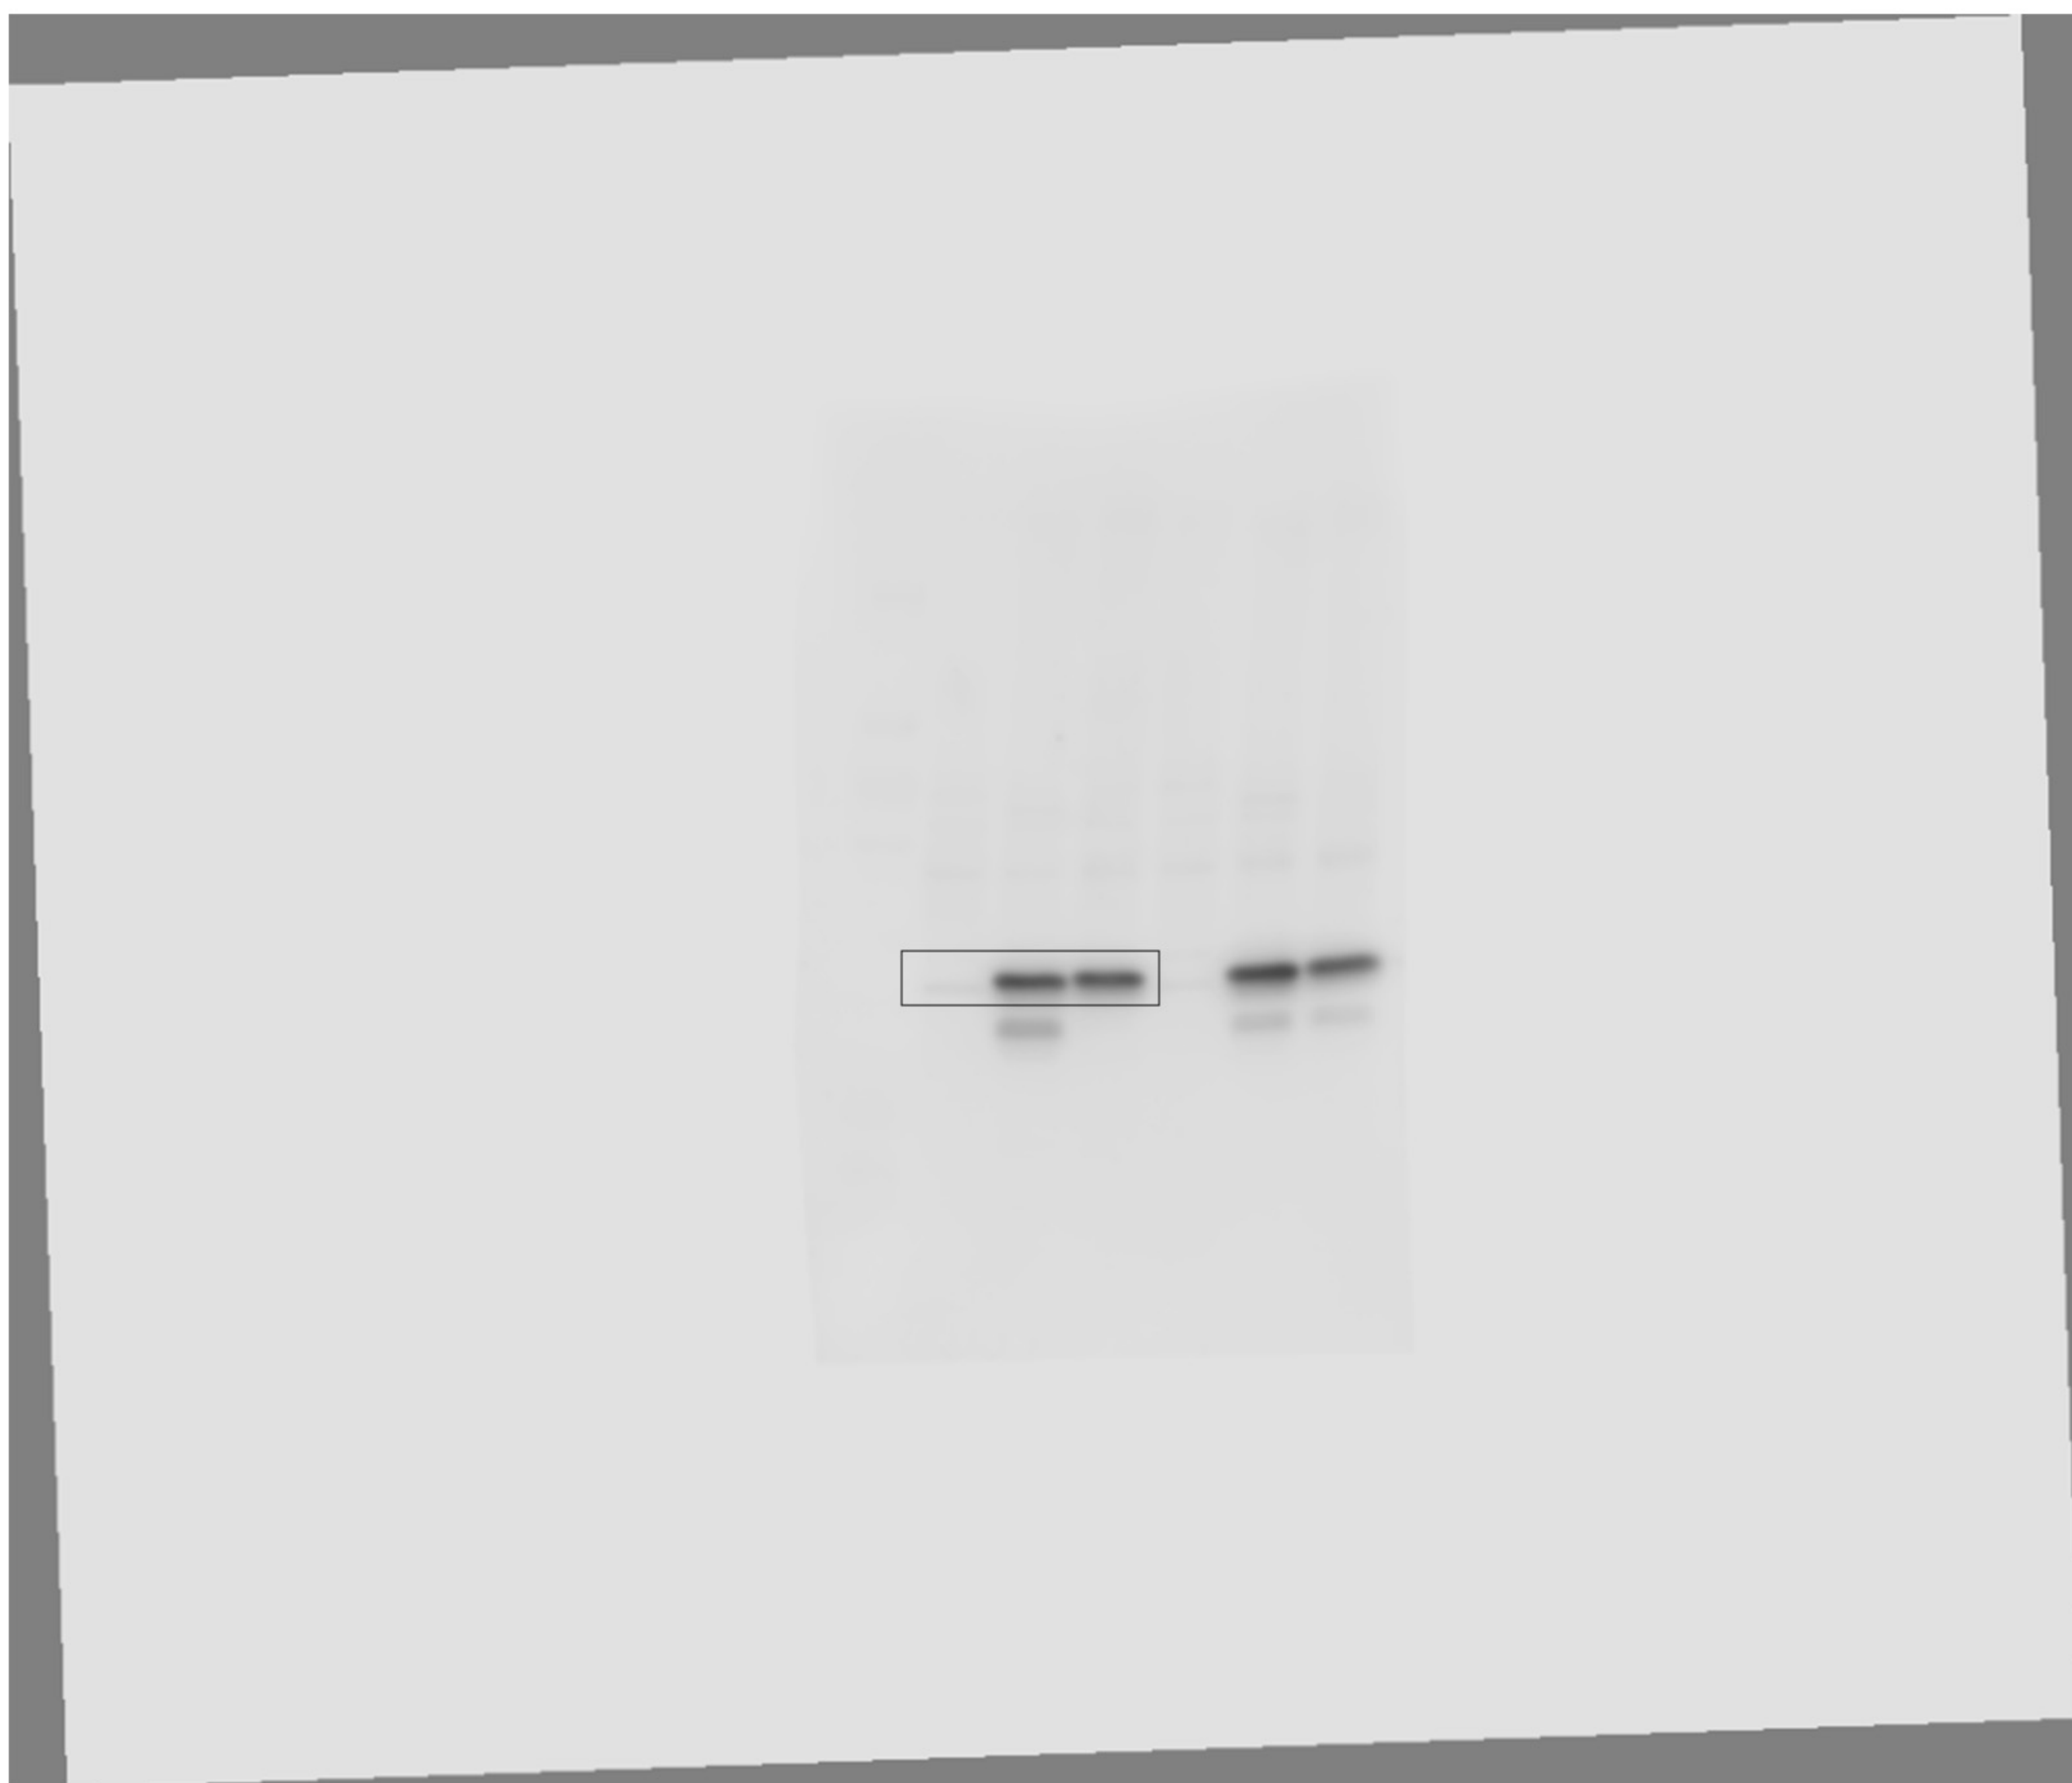

Cropped area for Figure 4-figure supplement1 G  
Eluate, Aac2

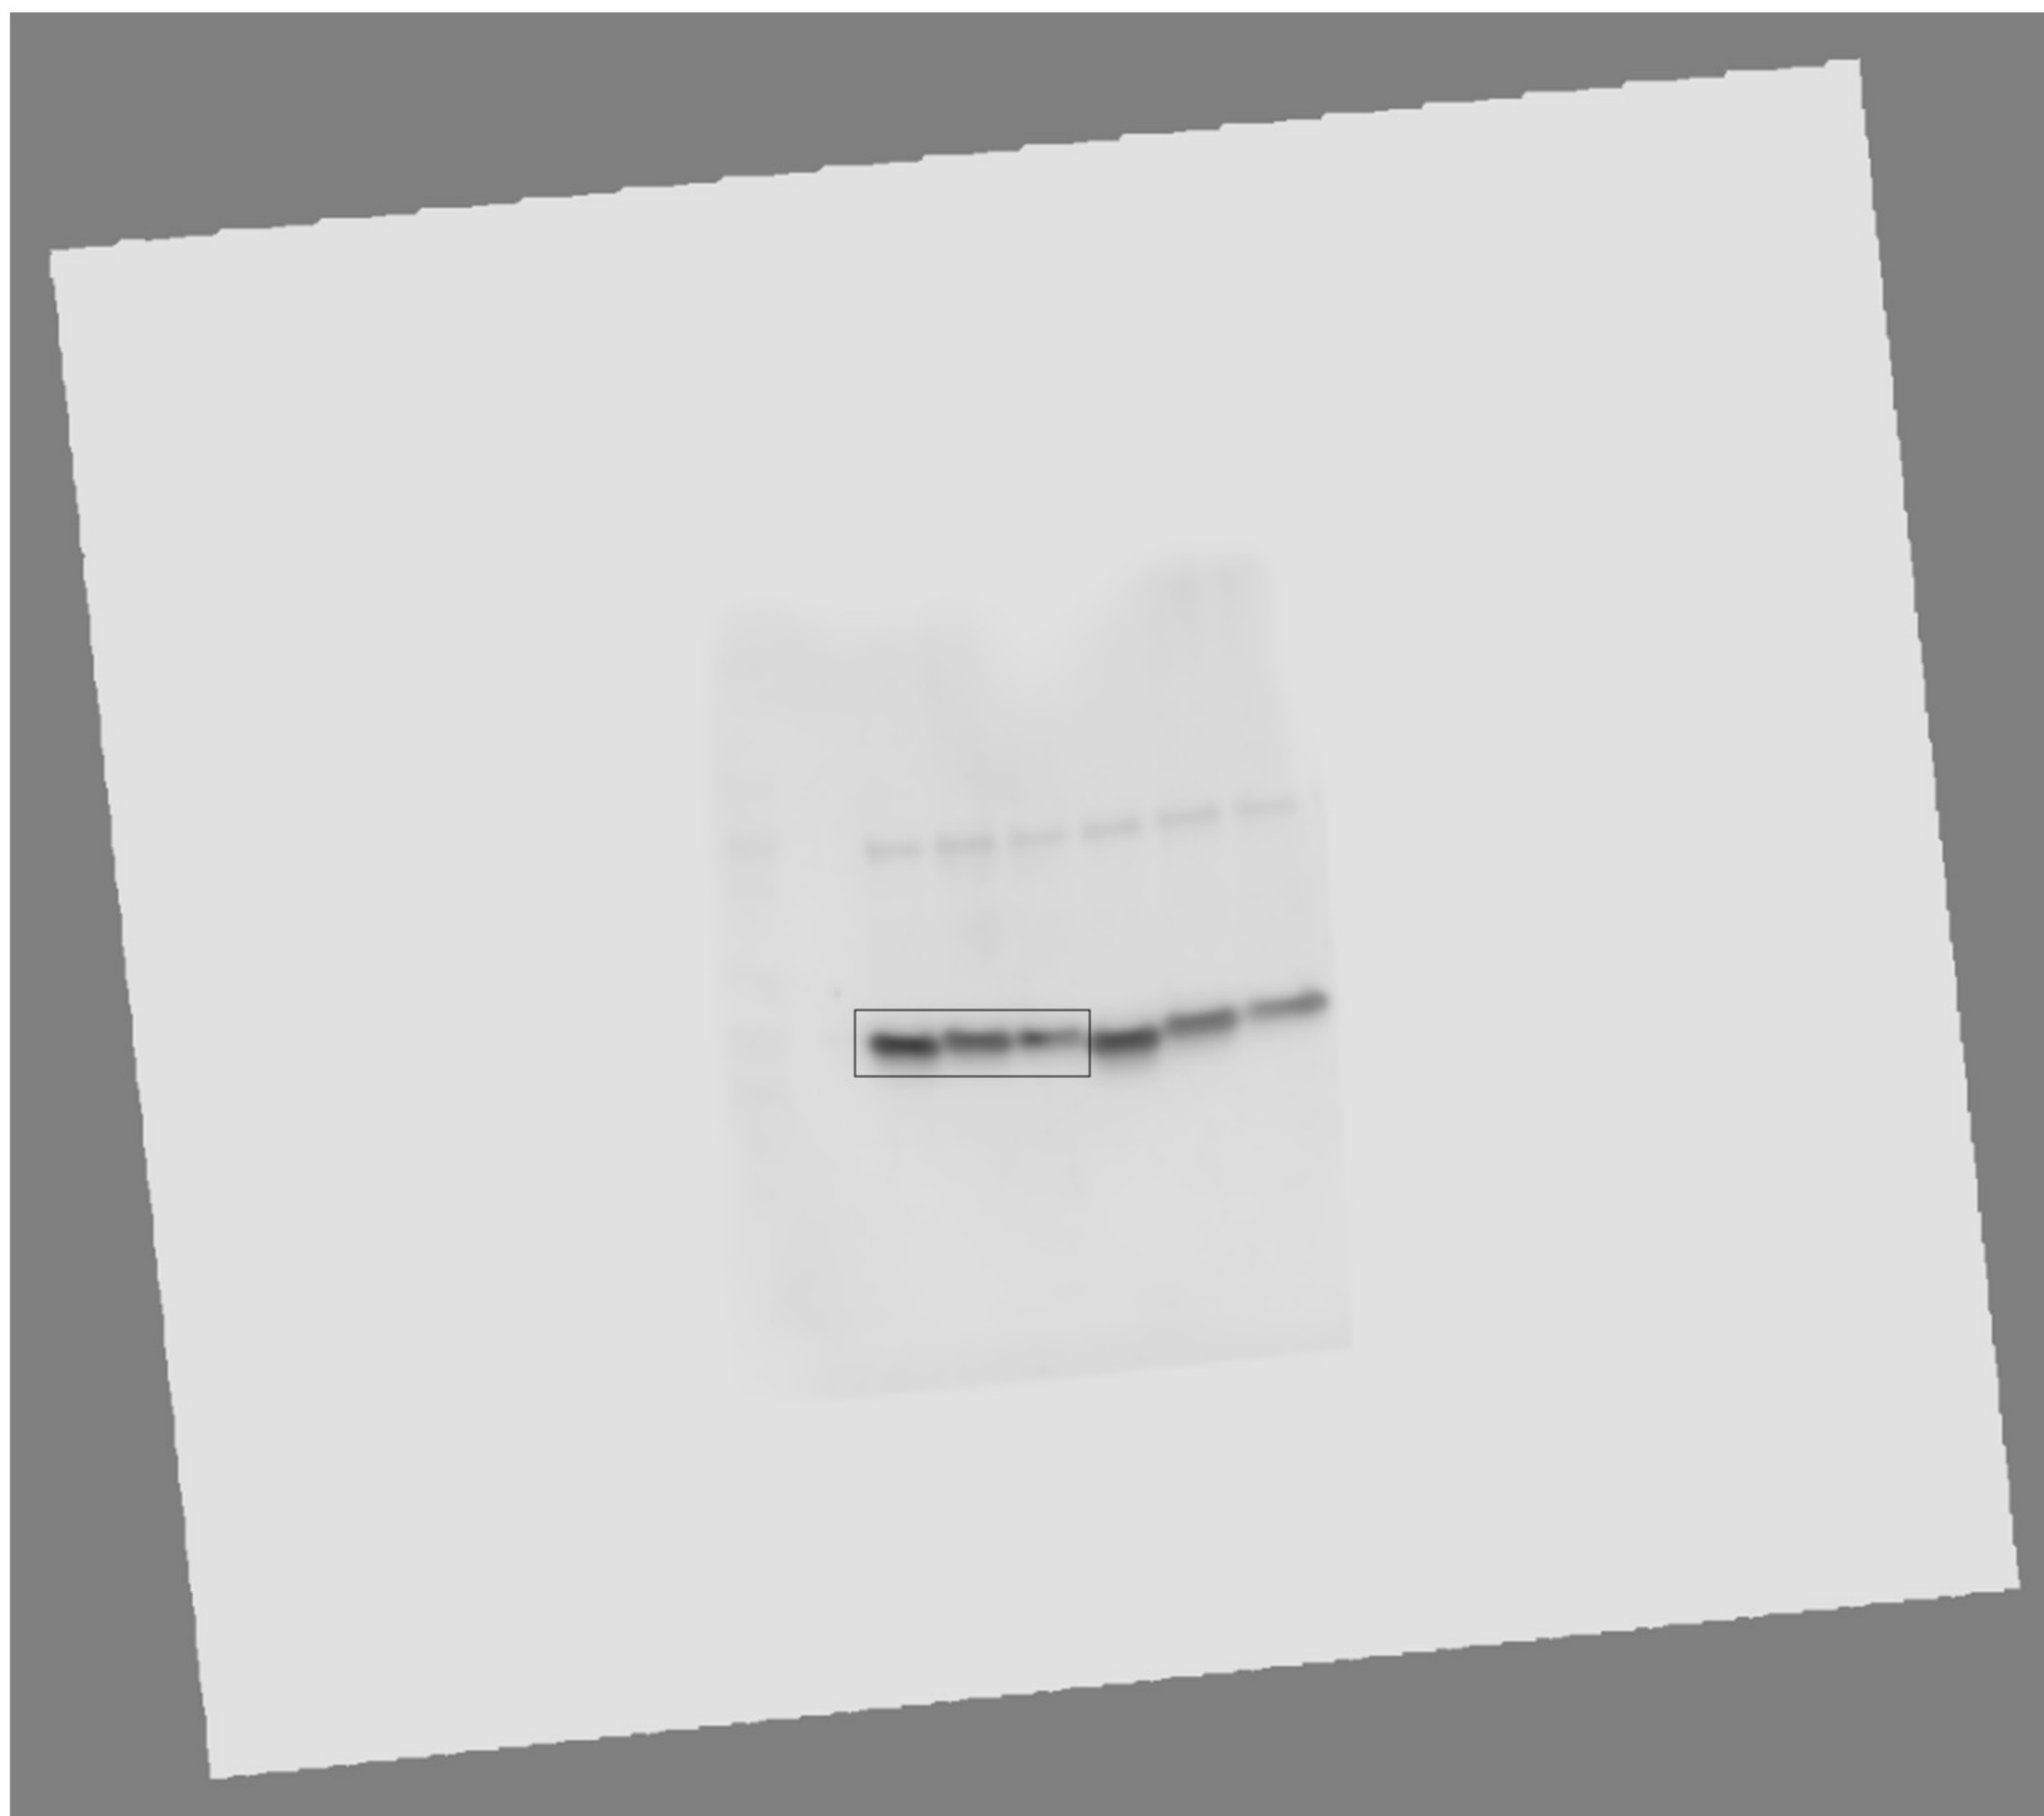

Cropped area for Figure 4-figure supplement1G  
Input, Aac2

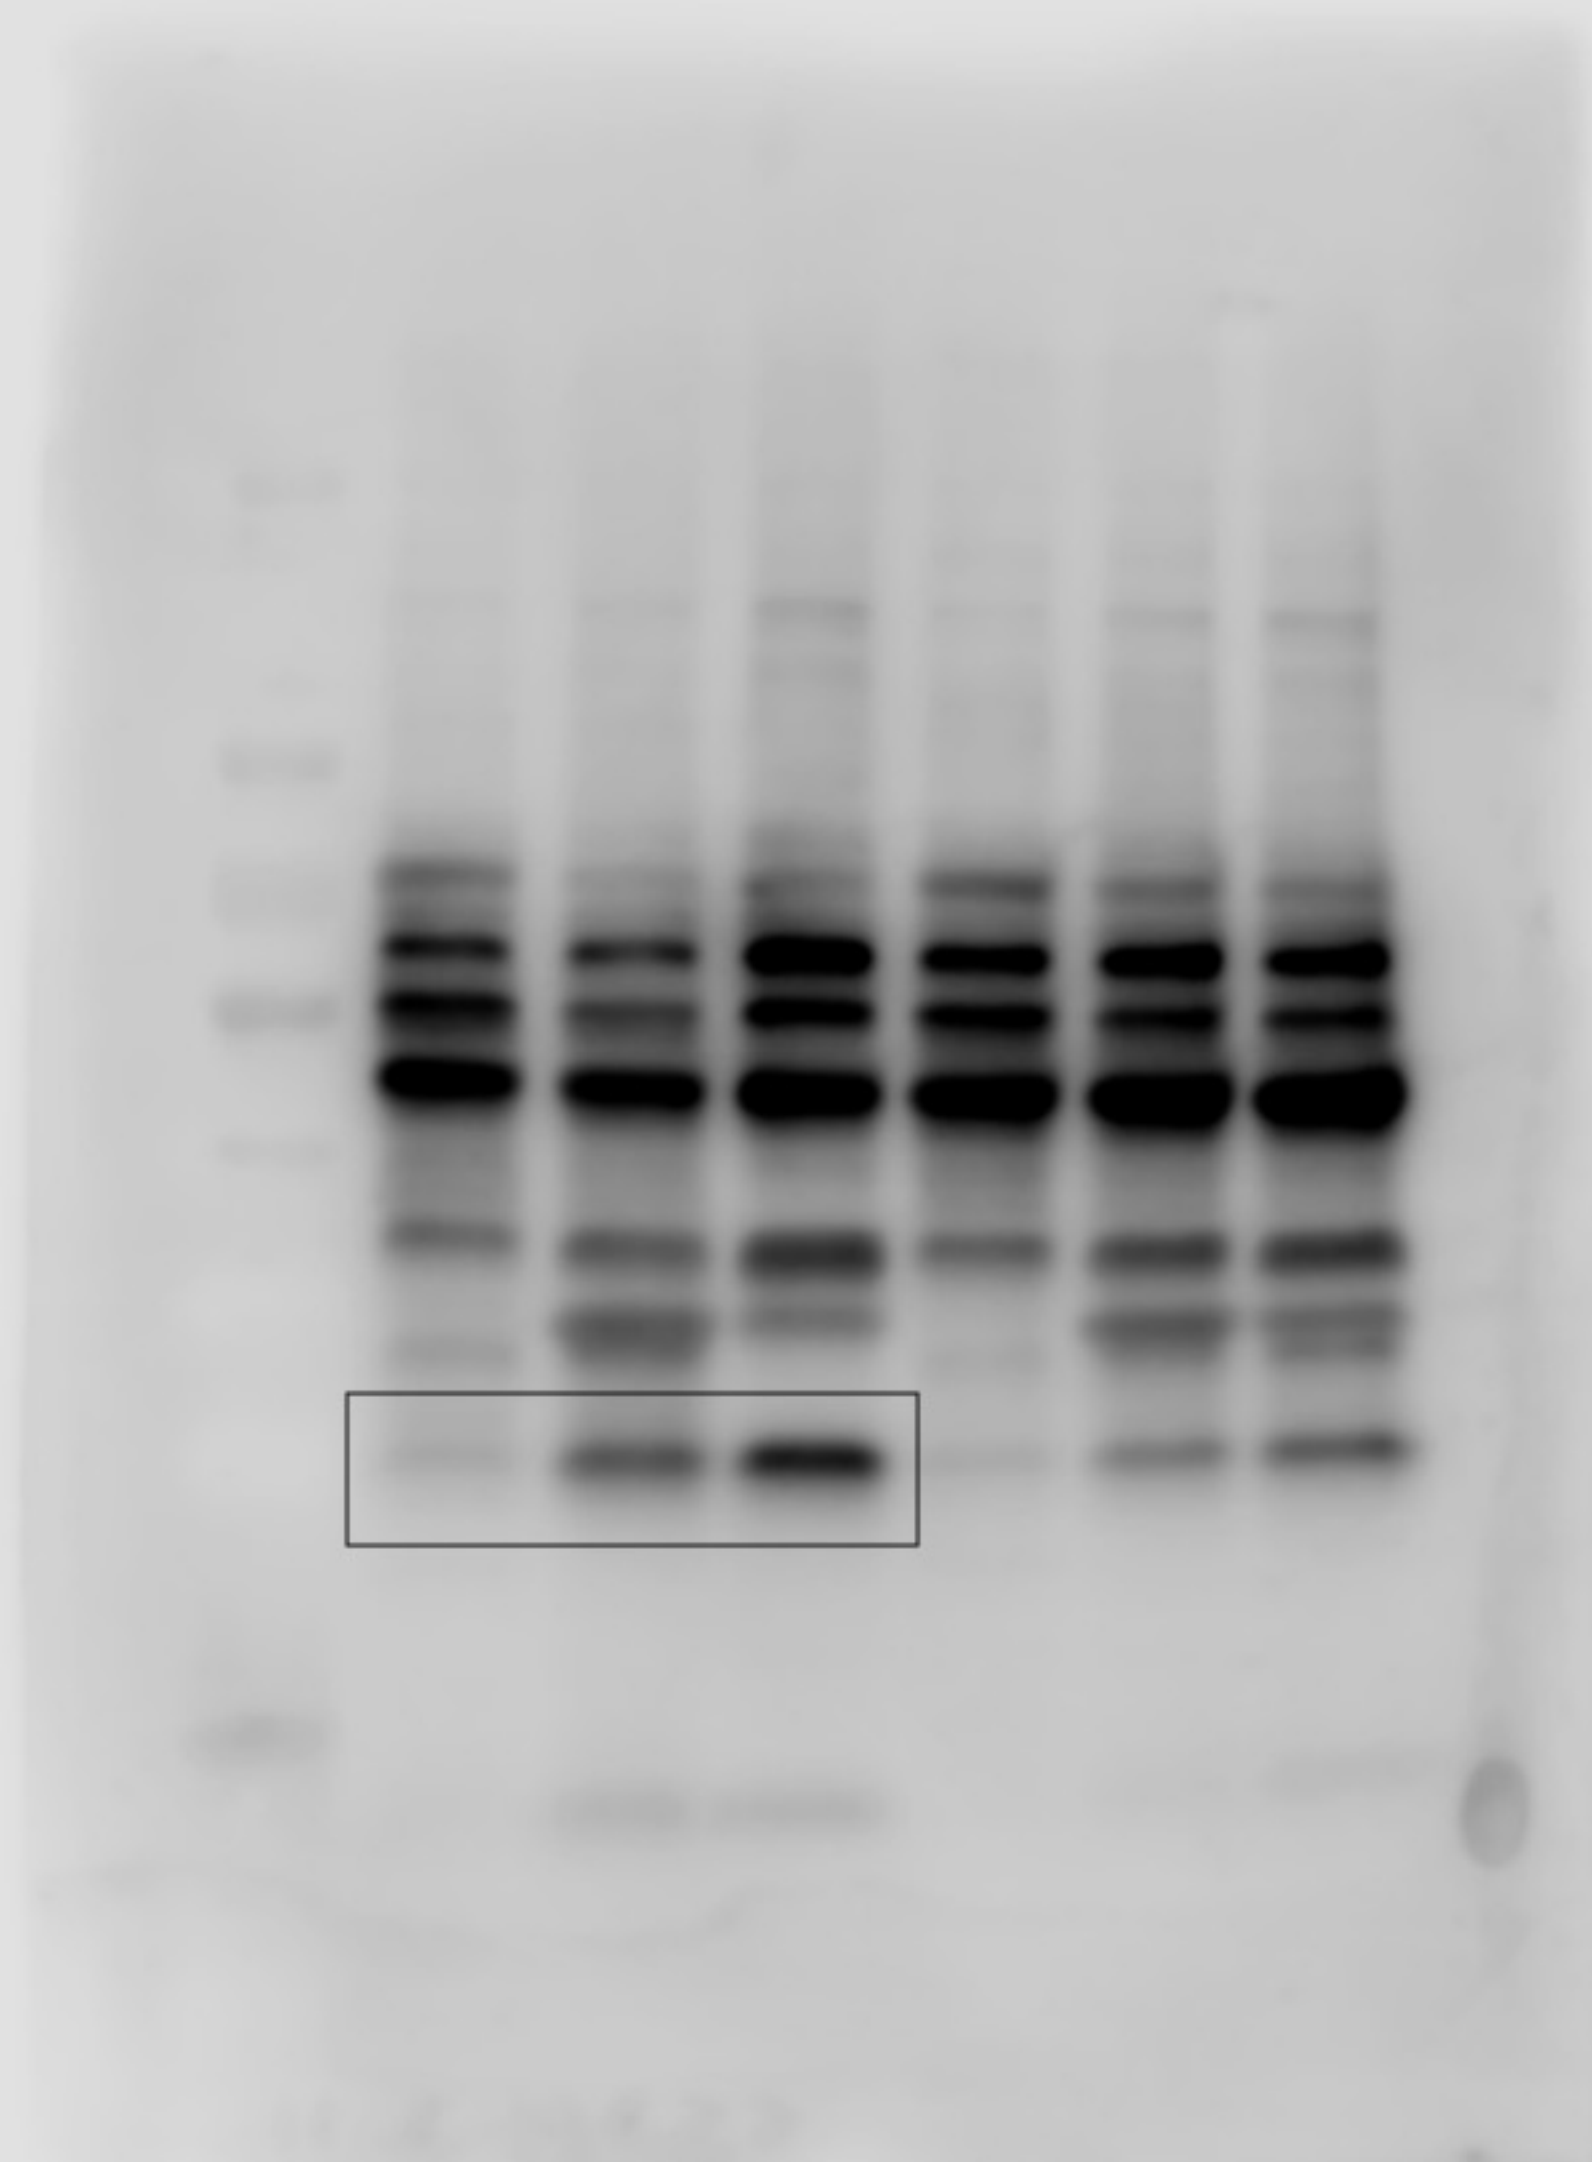

Cropped area for Figure 4-figure supplement1G  
Eluate, Tim22

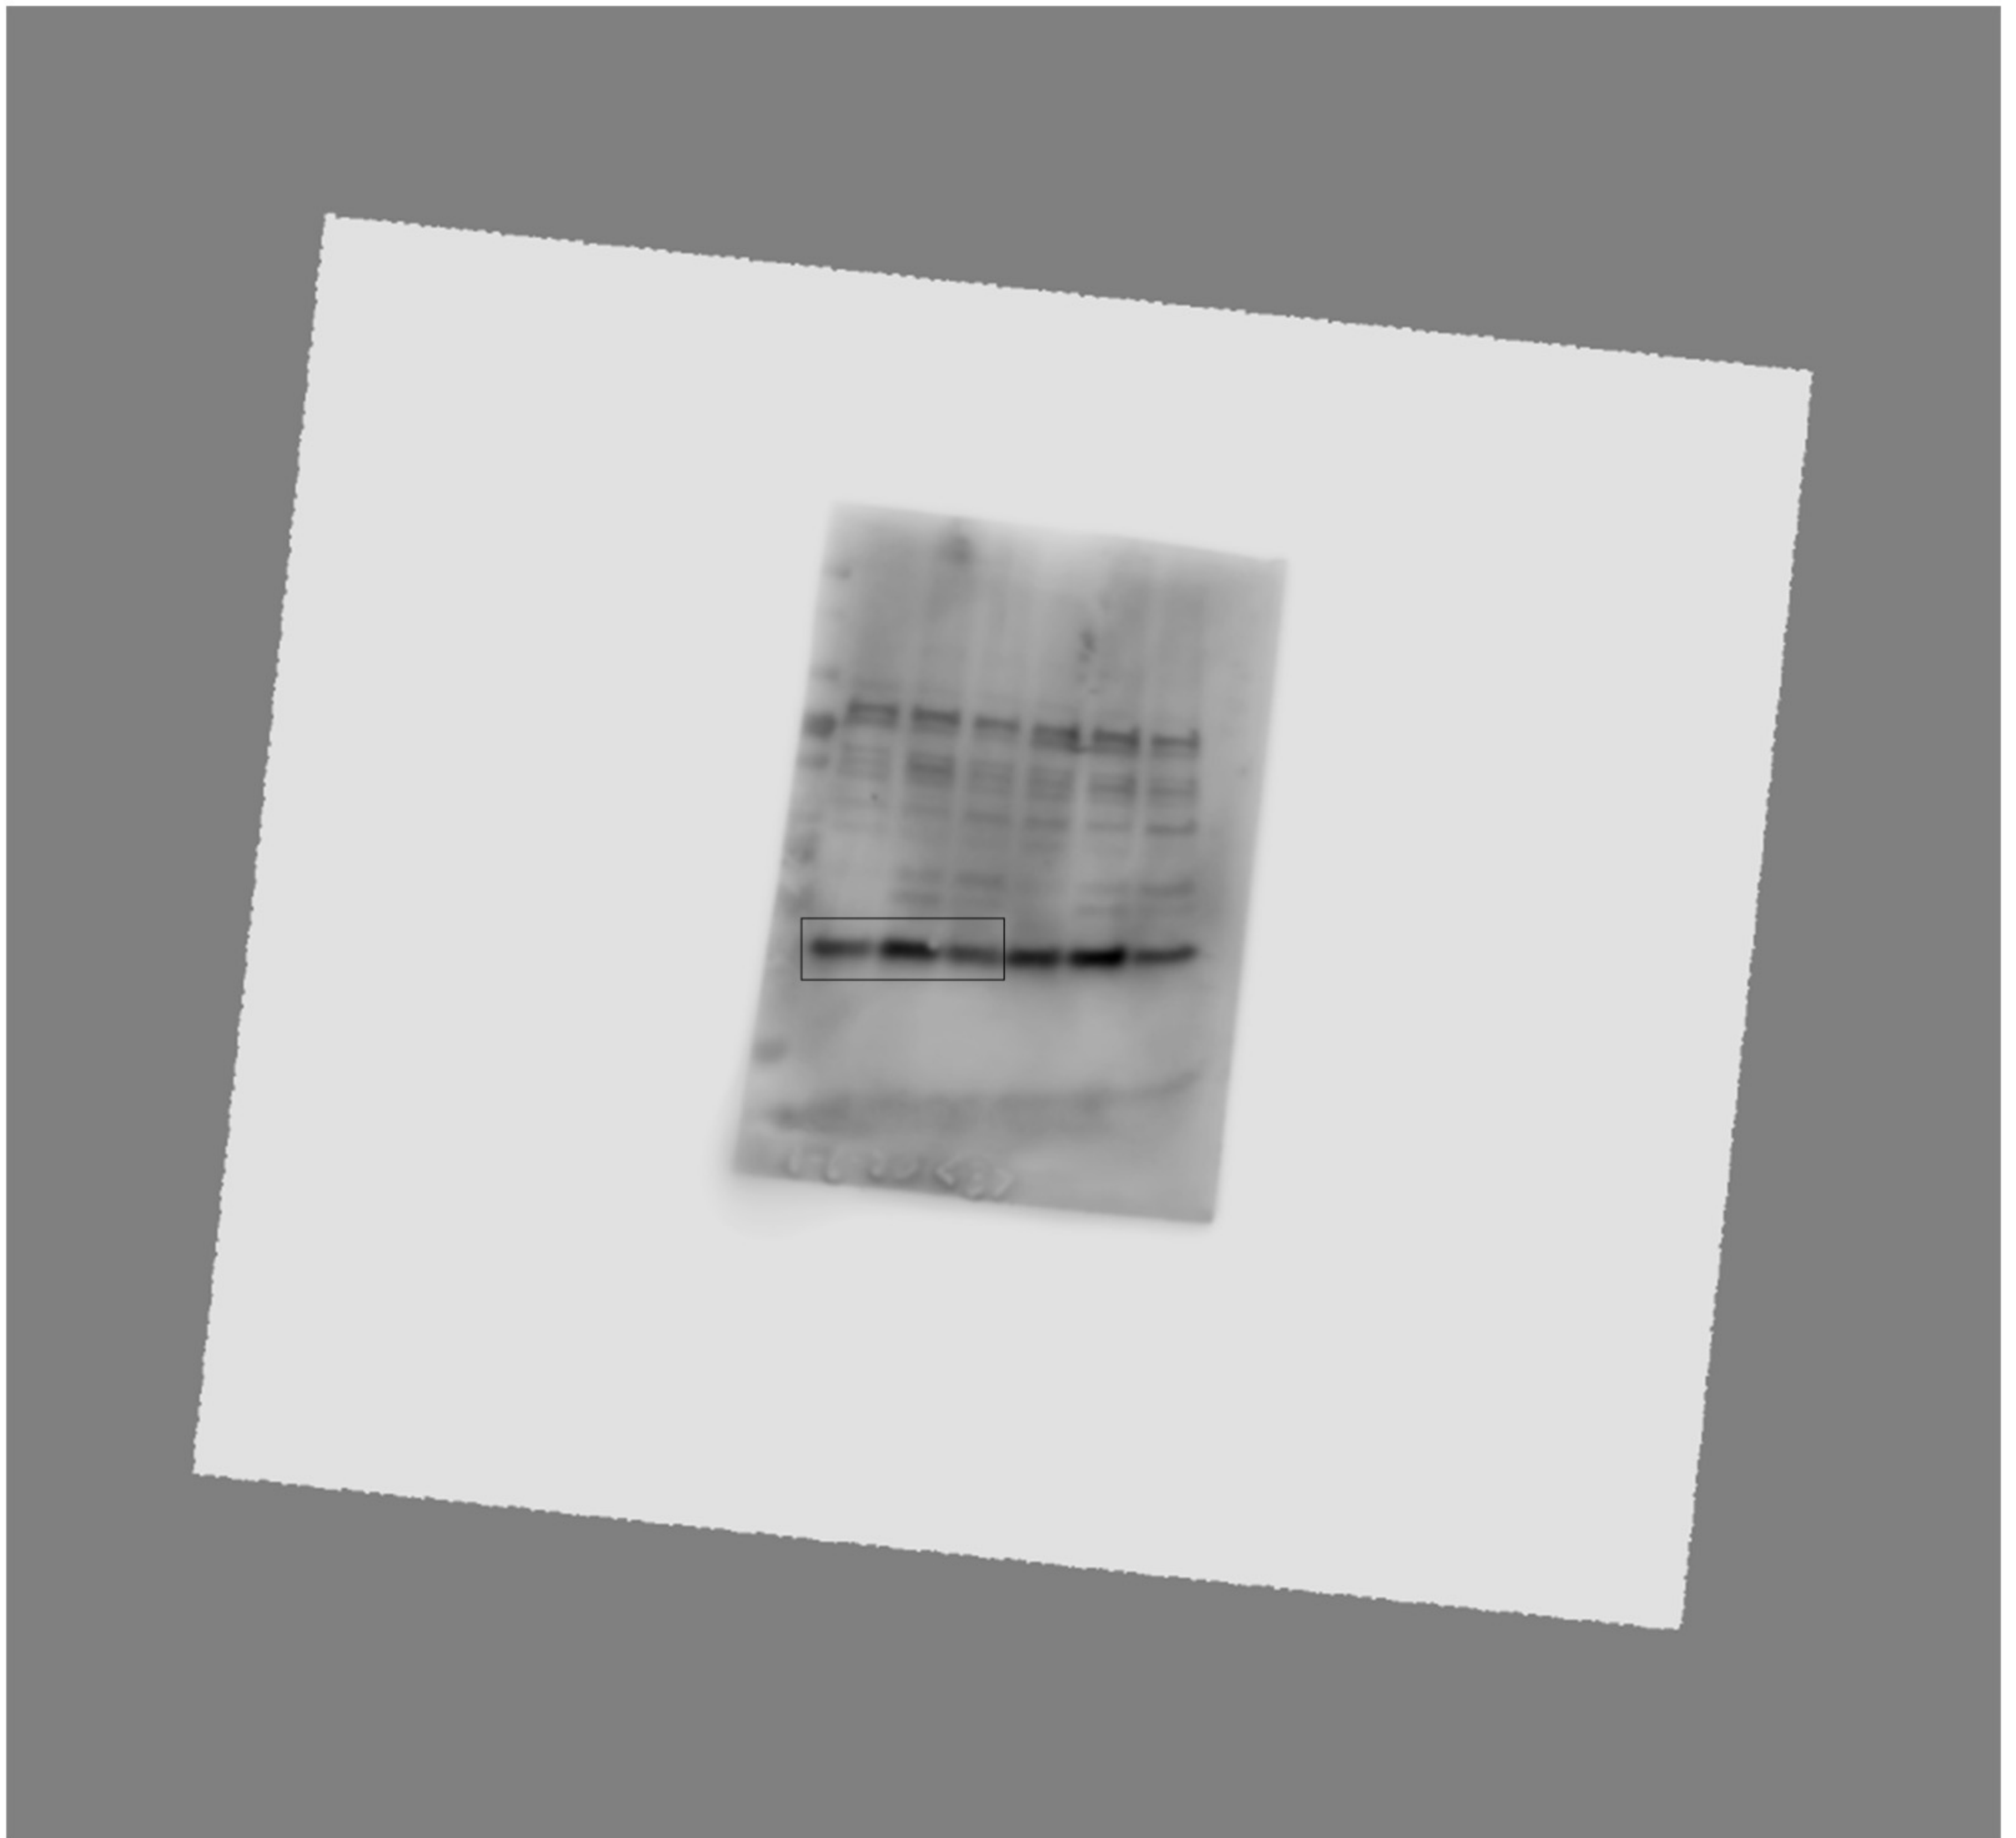

Cropped area for Figure 4-figure supplement1 G  
Input, Tim22
