# Supplementary material for: Mitochondrial protein import clogging as a mechanism of disease
Source: eLife journal article supplement (doi:10.7554/elife.84330), 2023-05-02
Supplement: fig4-figsupp2-data2 [file Figure 4-figure supplement 2-source data_annotated.pdf › Figure 4-figure supplement 2-source datat 1/Figure 4-figure supplement 2-source data_annotated.pdf]

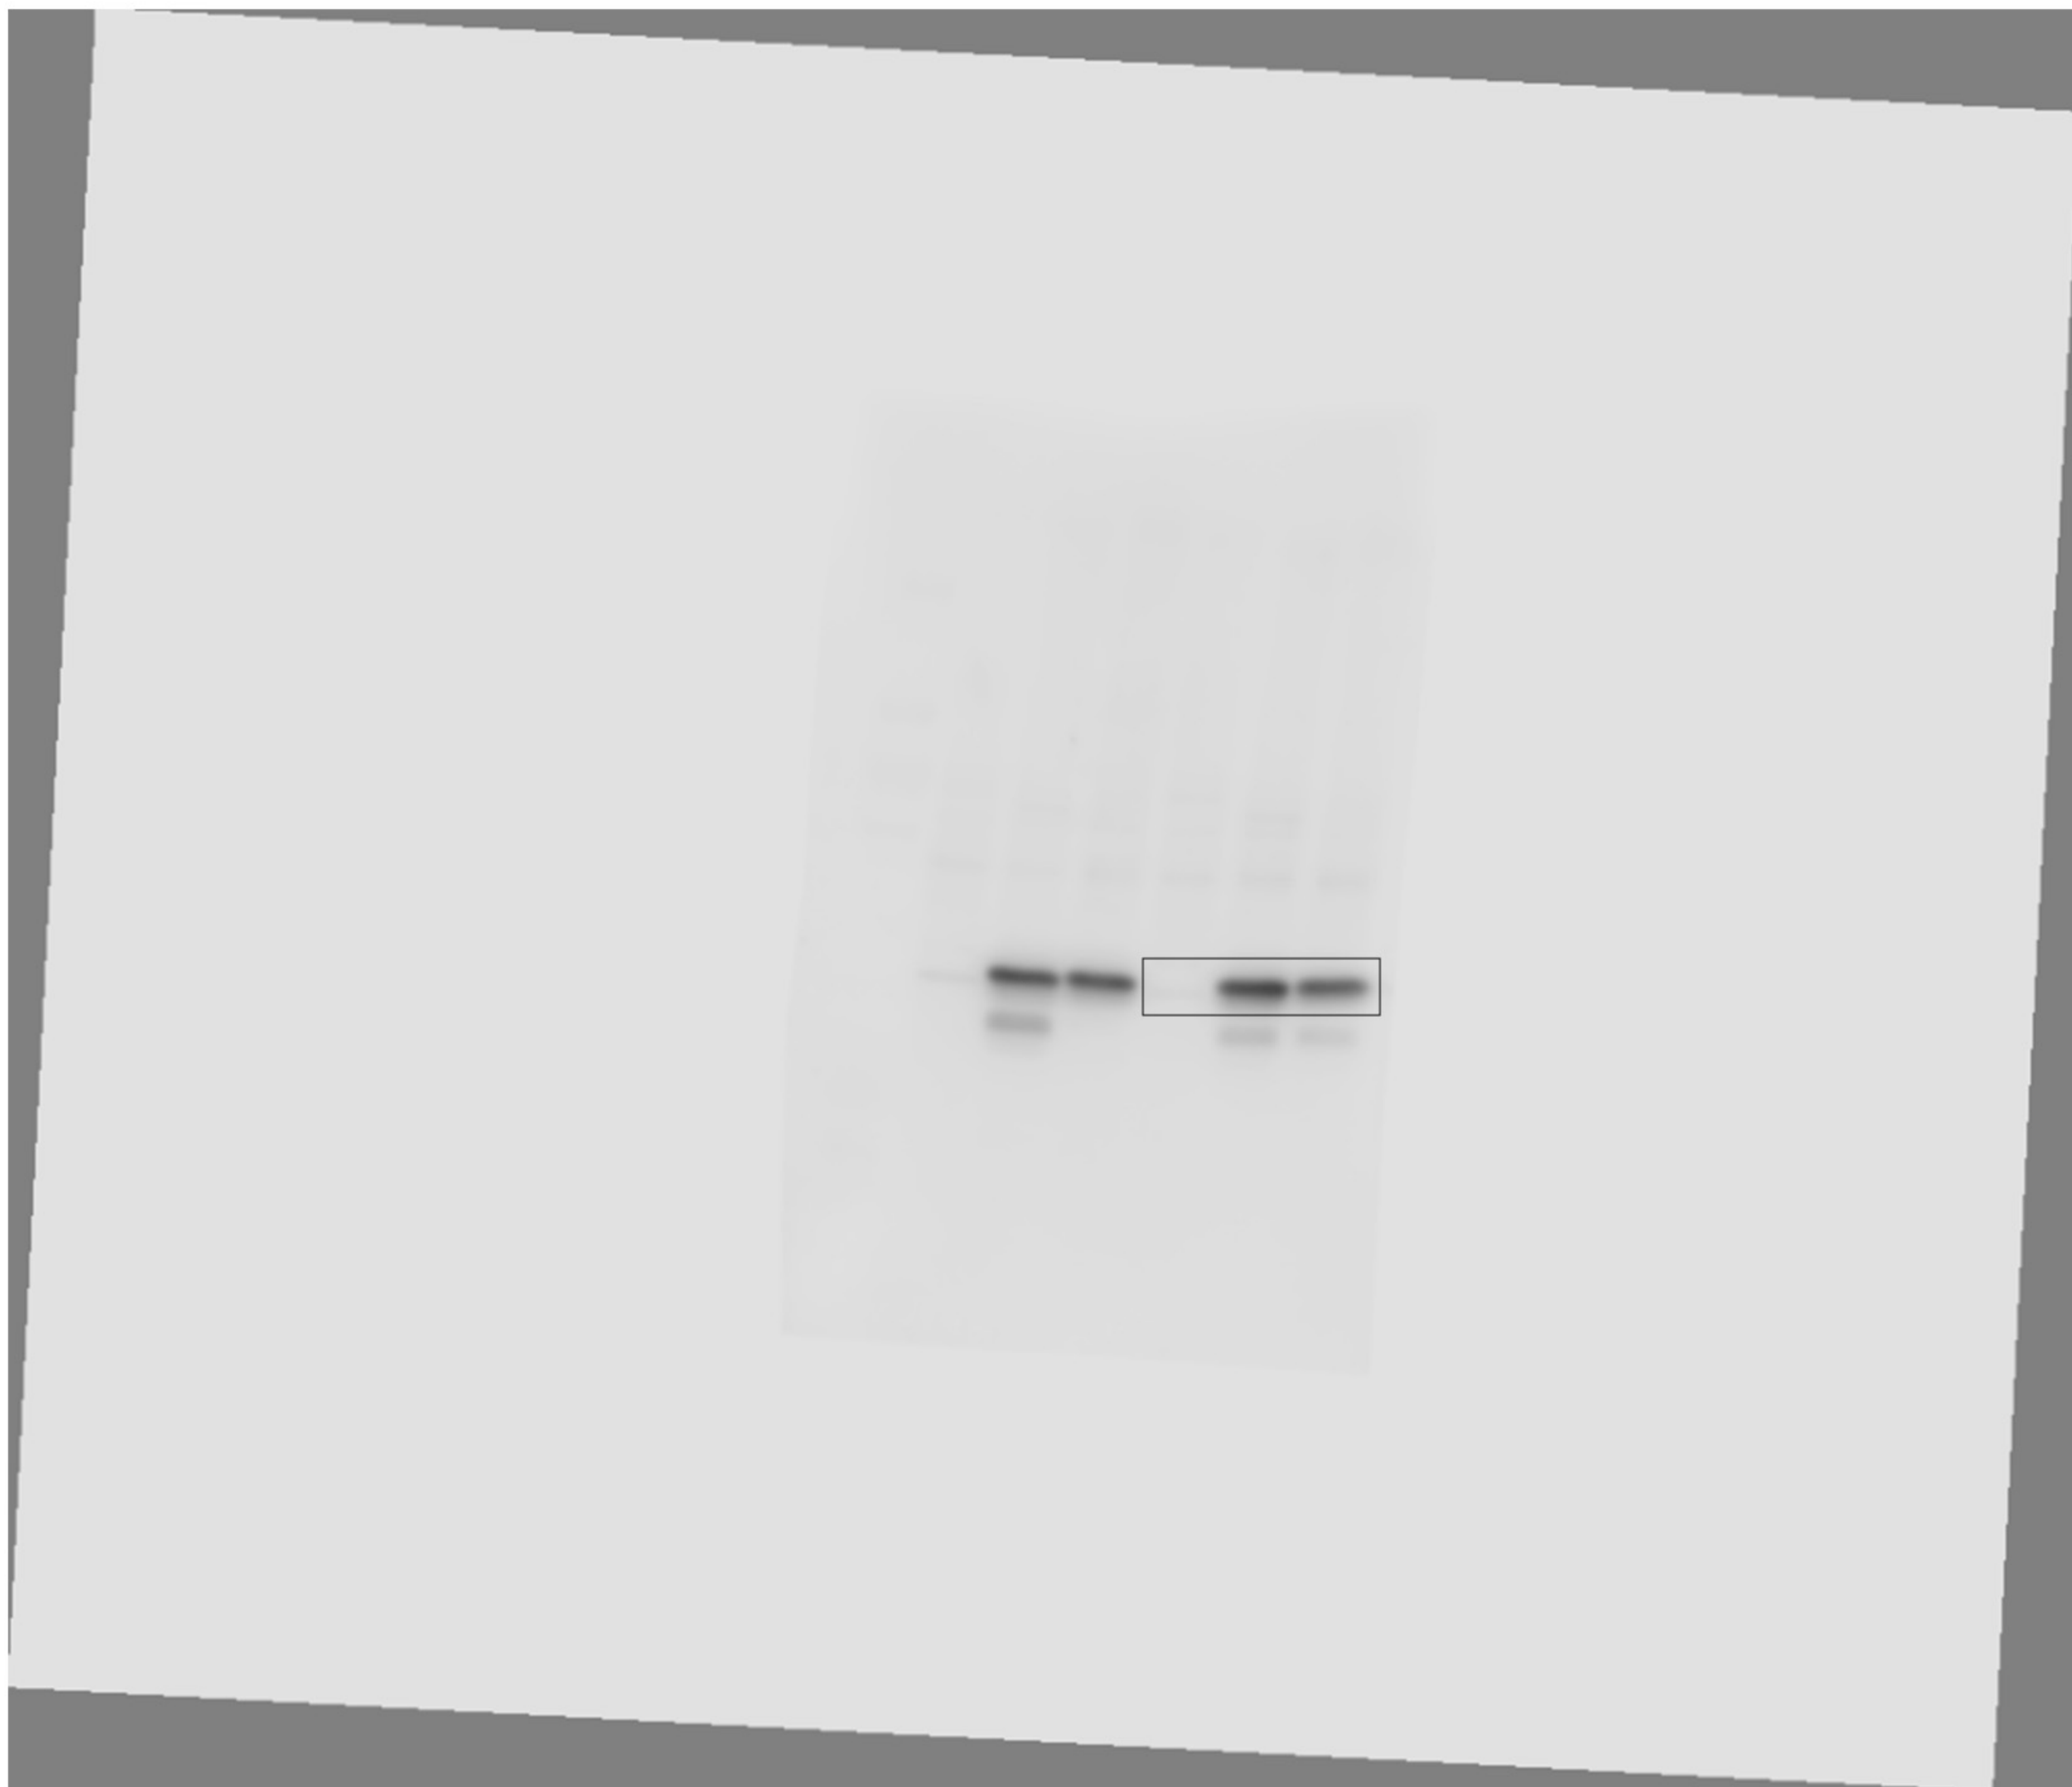

Cropped area for Figure 4-figure supplement 2C  
Eluate, Aac2

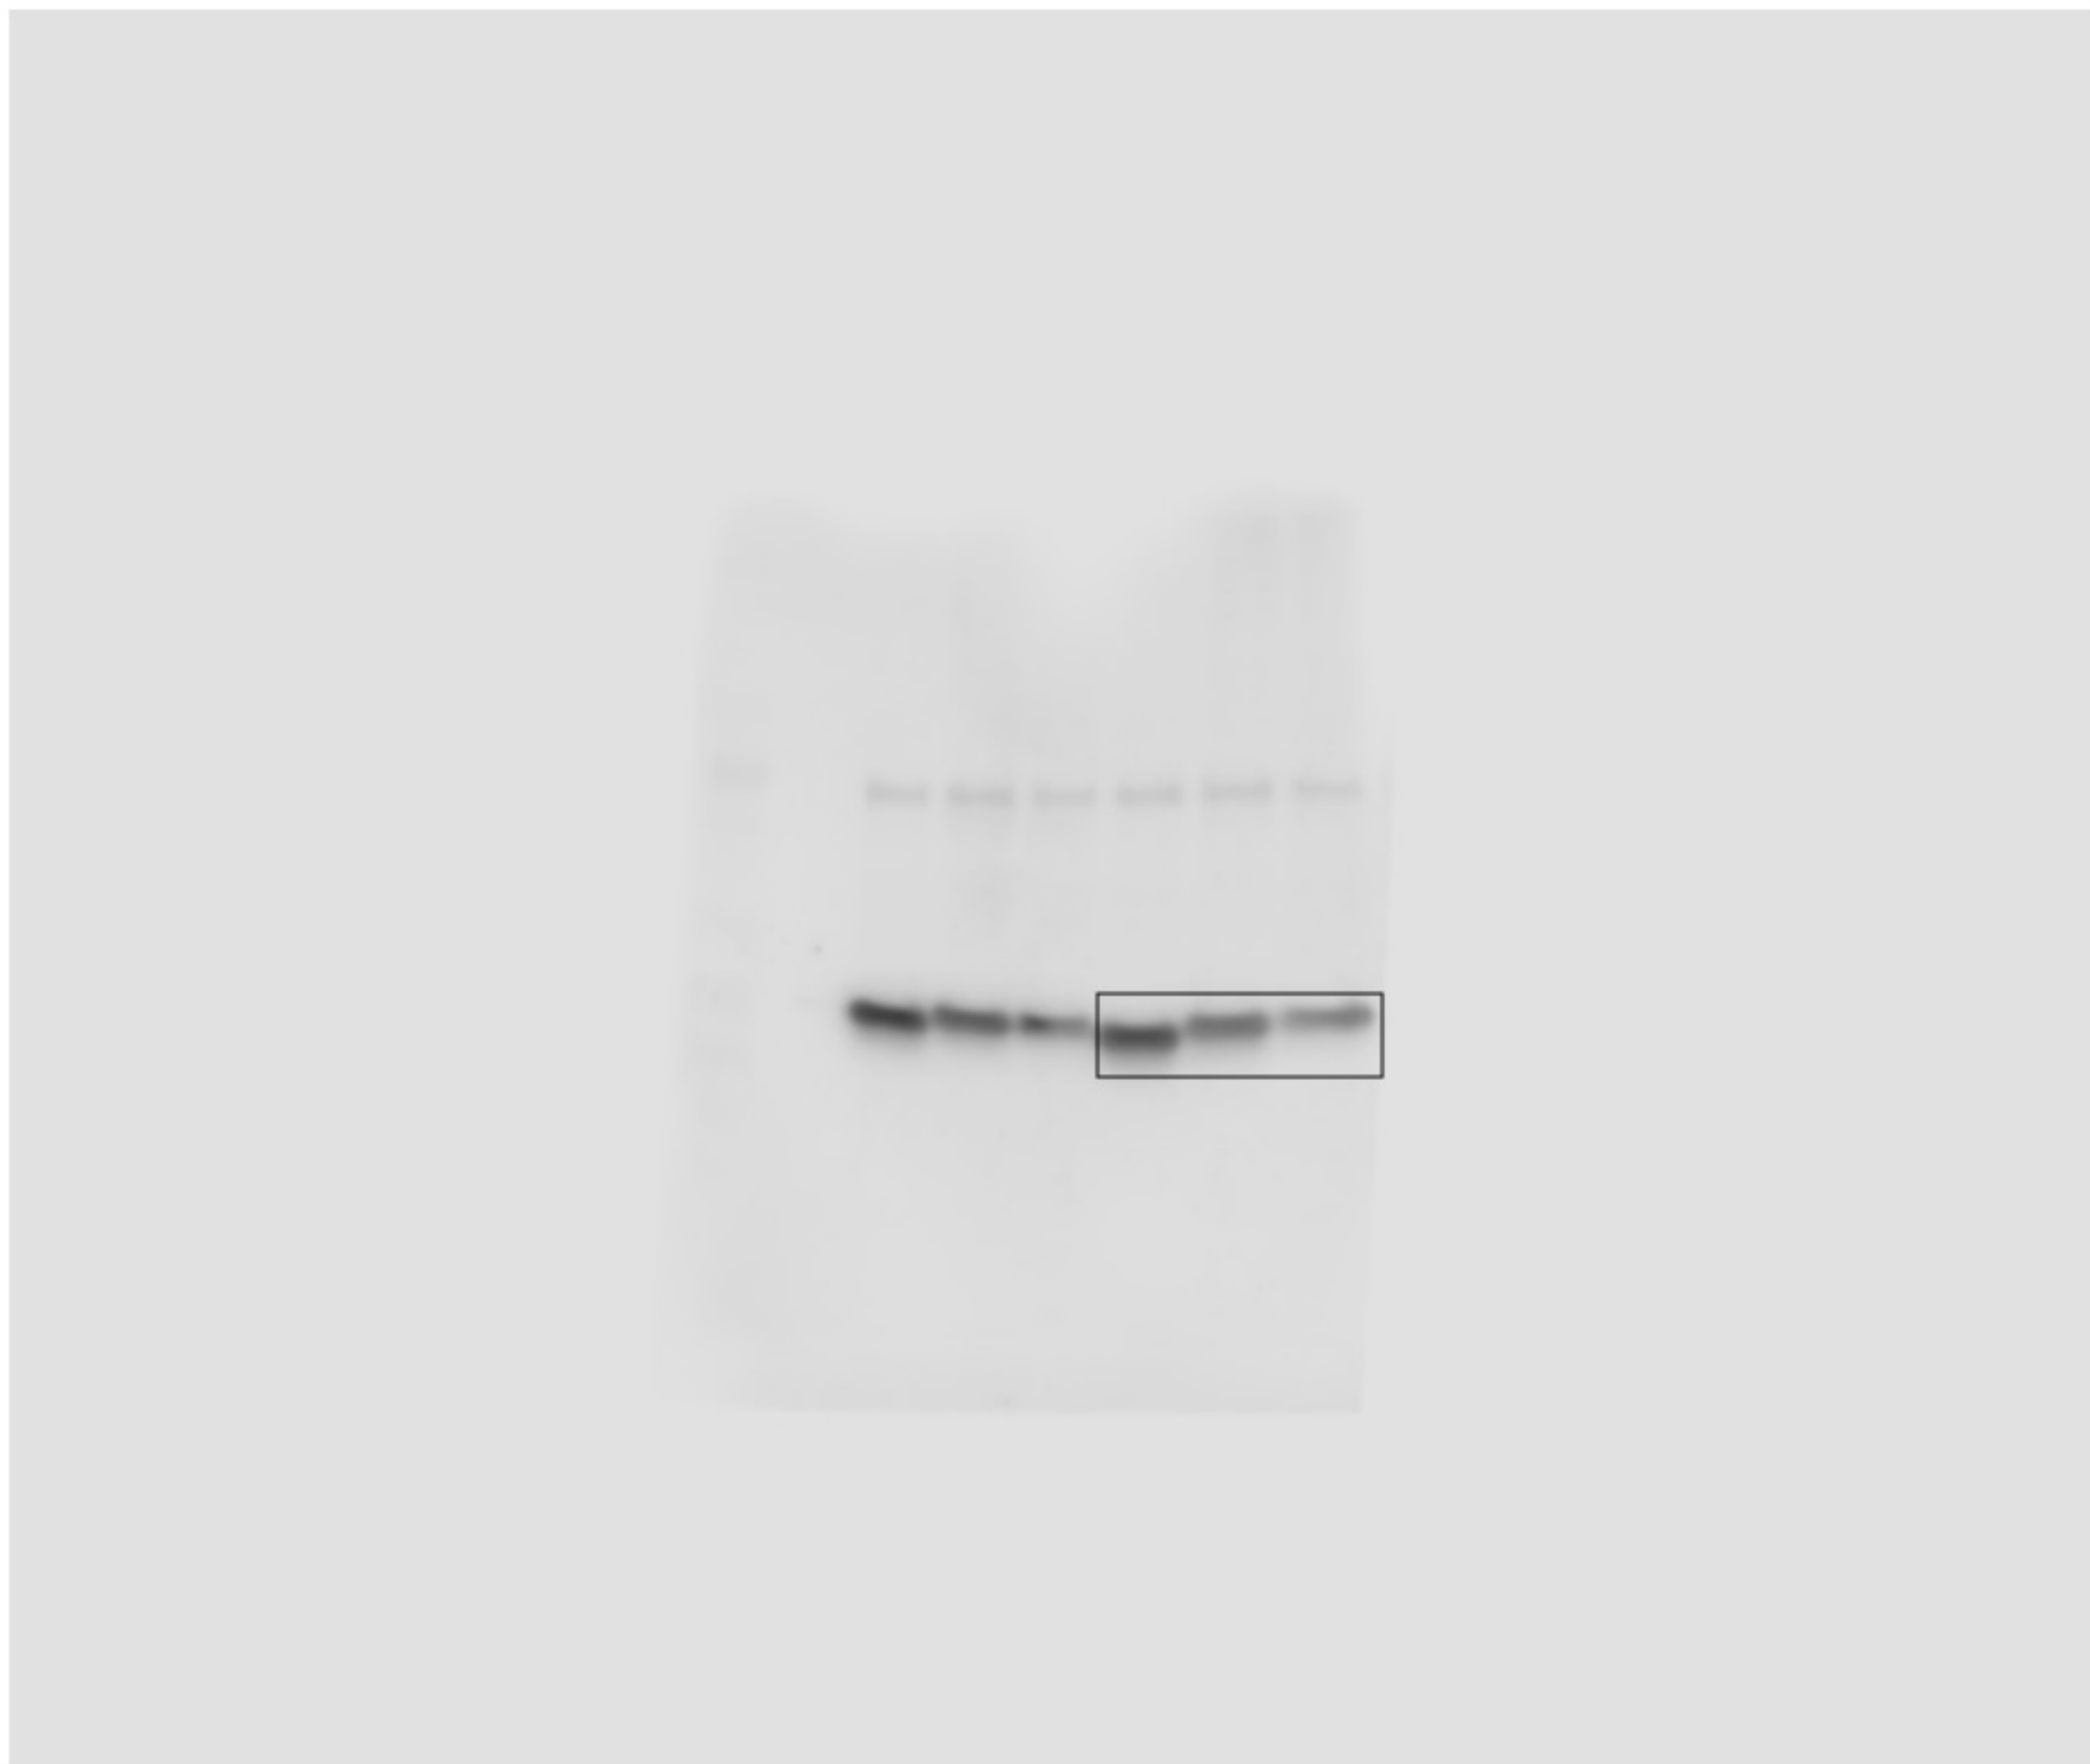

Cropped area for Figure 4-figure supplement 2C  
Input, Aac2

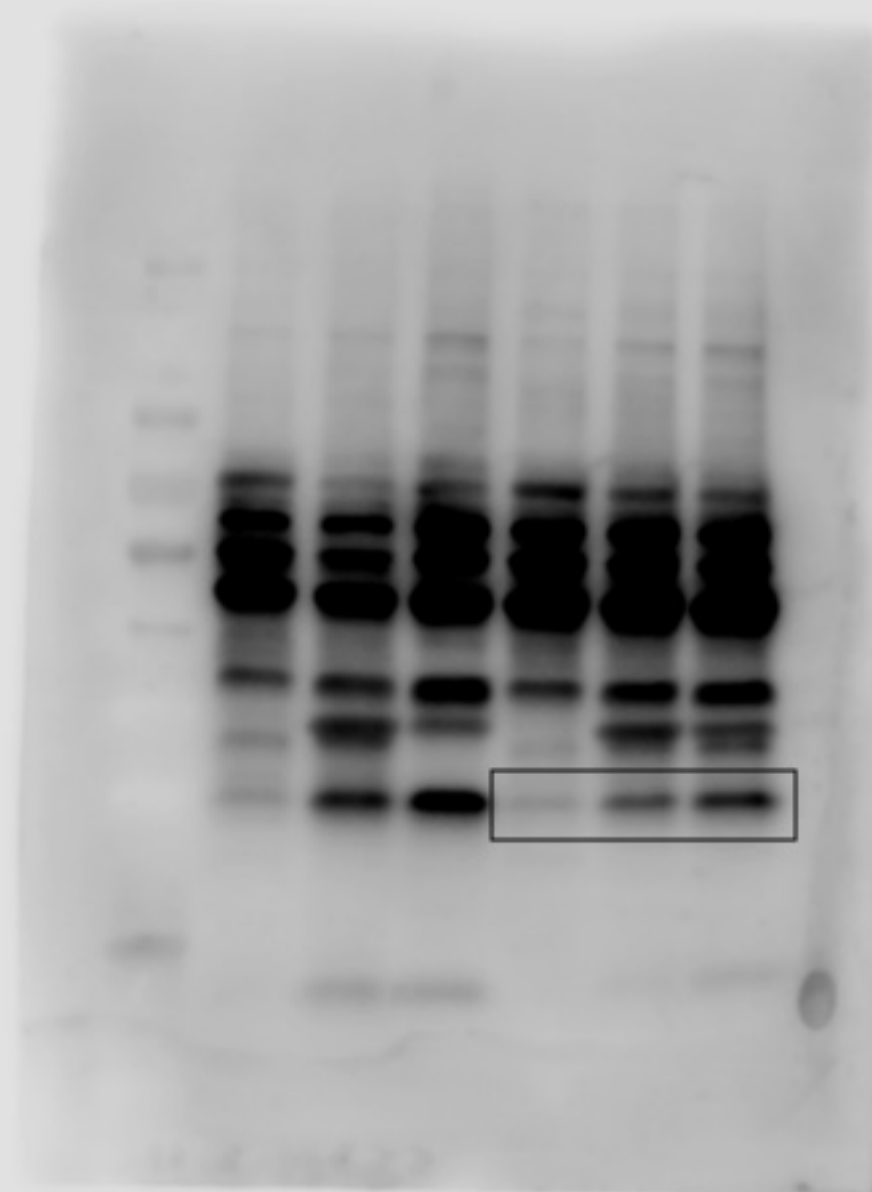

Cropped area for Figure 4-figure supplement 2C  
Eluate, Tim22

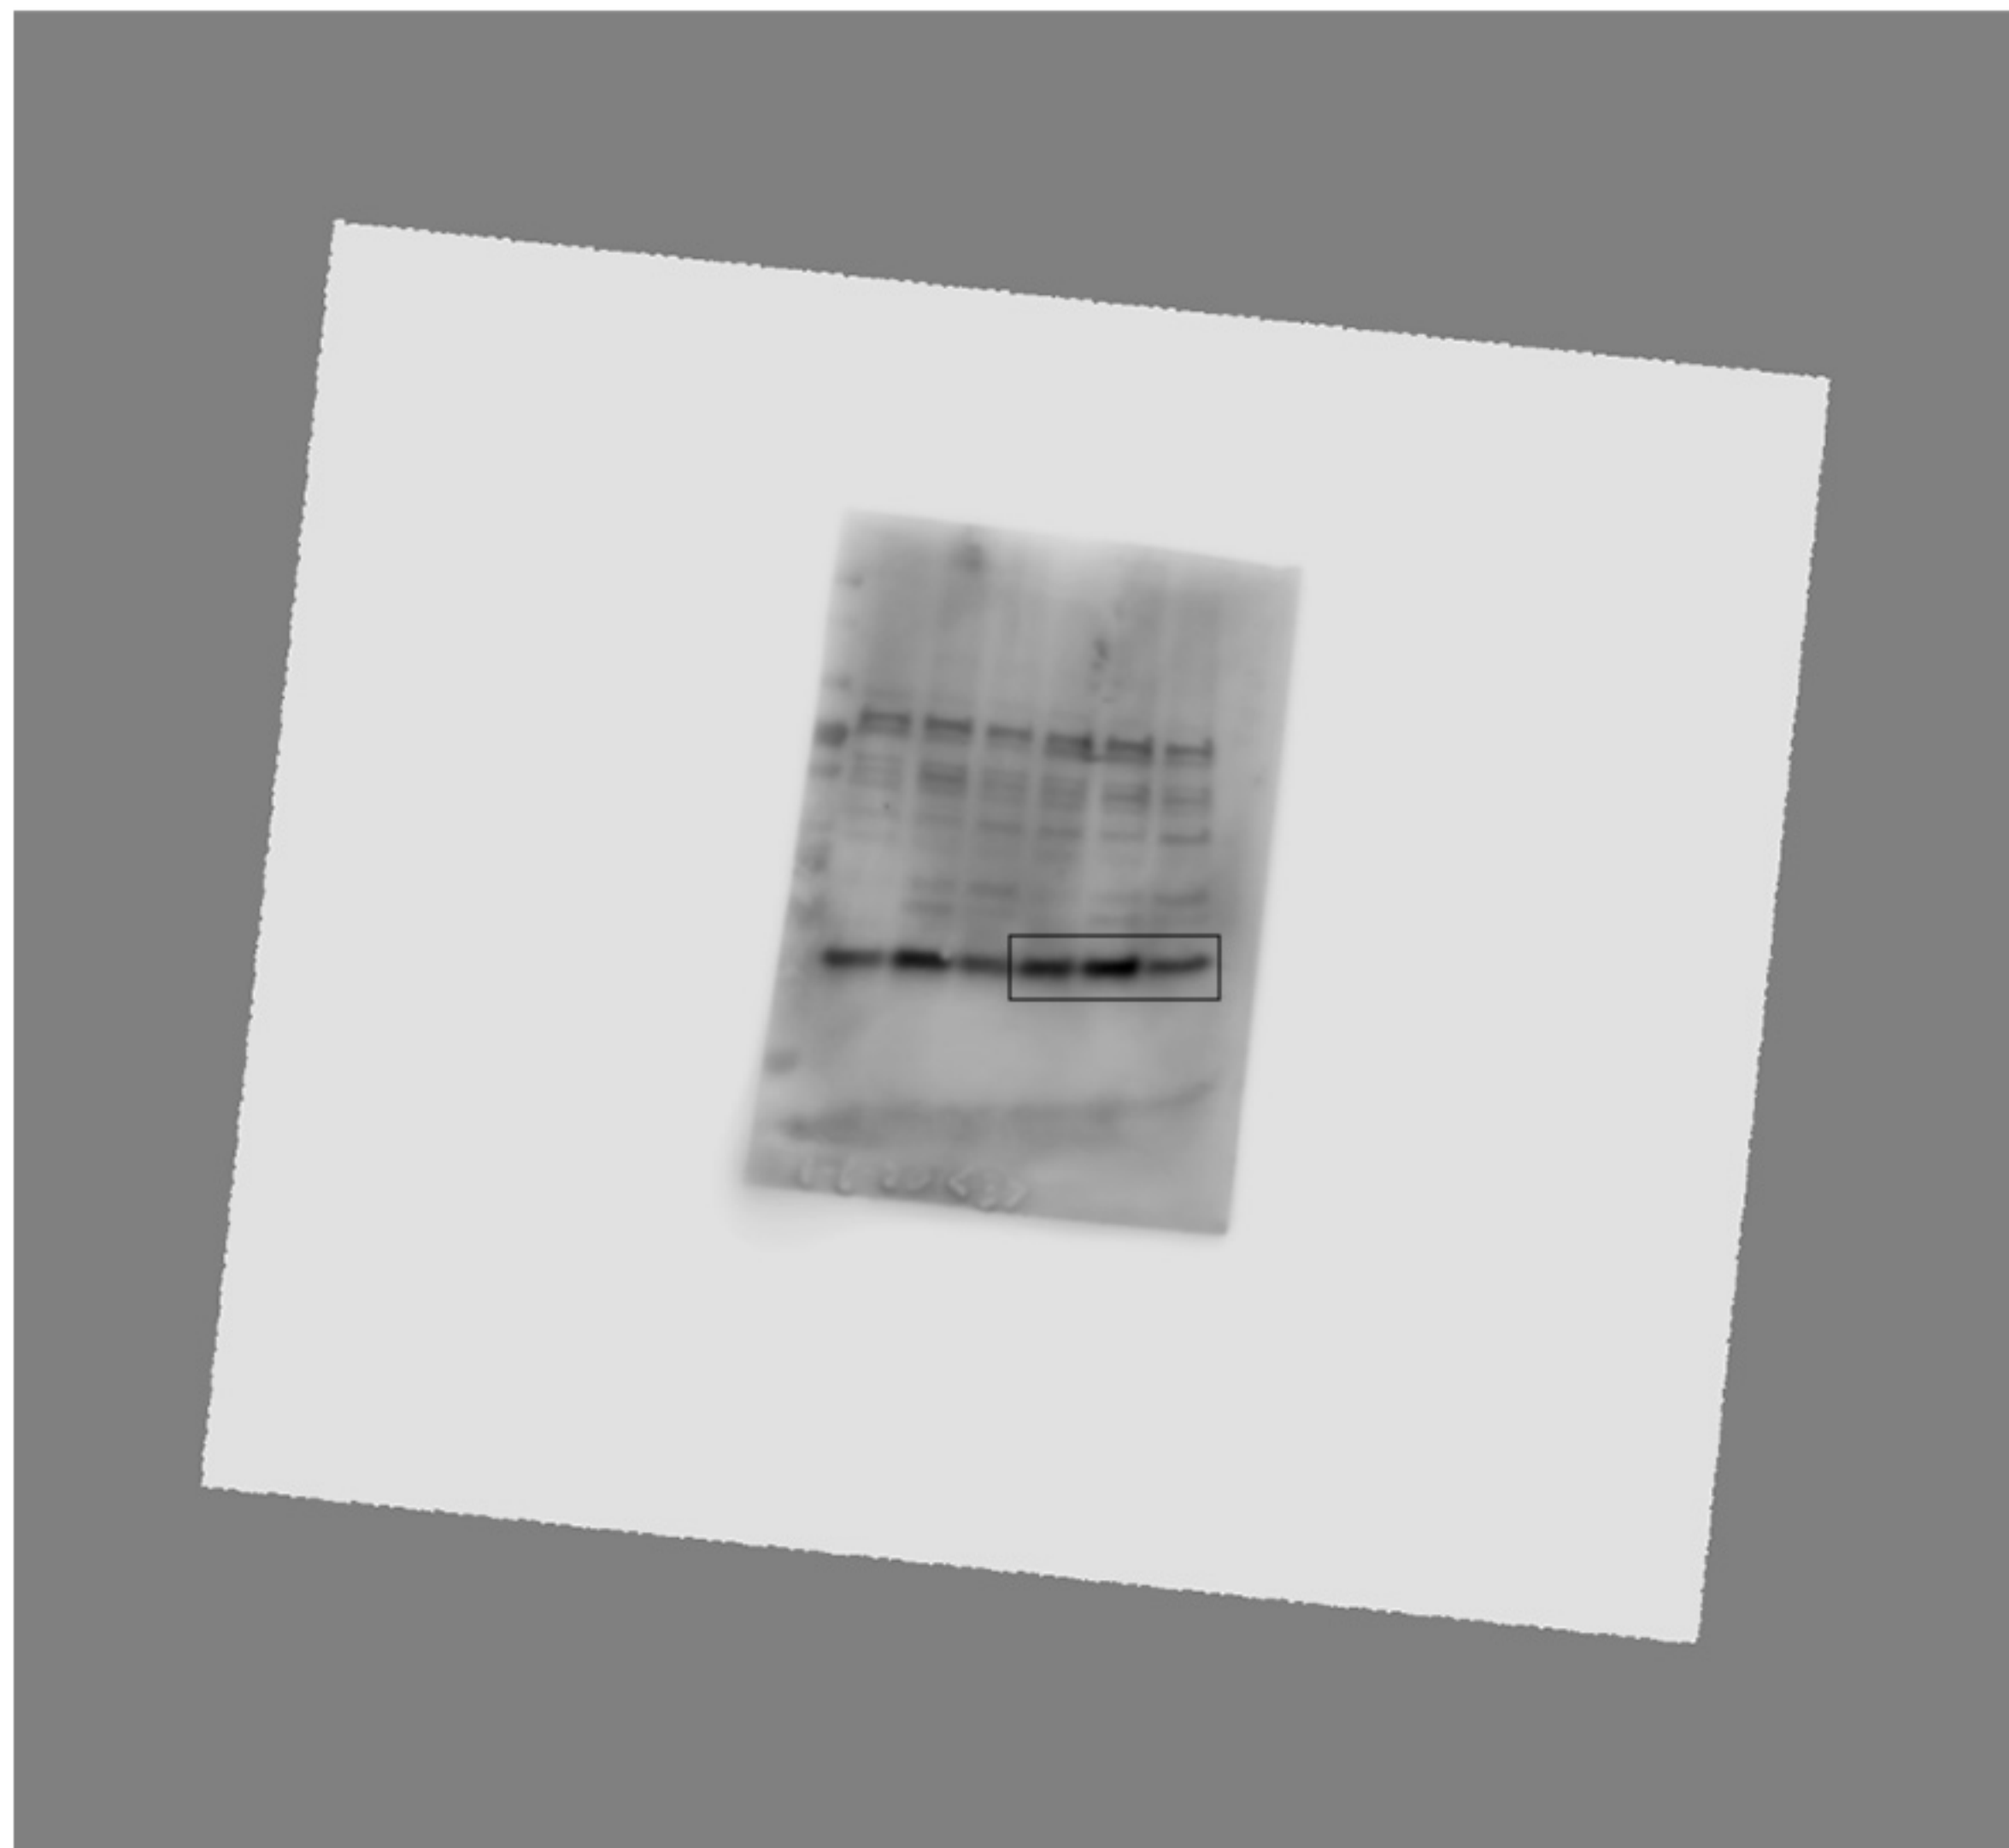

Cropped area for Figure 4-figure supplement 2C  
Input, Tim22
