# Supplementary material for: Mitochondrial protein import clogging as a mechanism of disease
Source: eLife journal article supplement (doi:10.7554/elife.84330), 2023-05-02
Supplement: fig5-data2 [file elife-84330-fig5-data2-v2.zip]

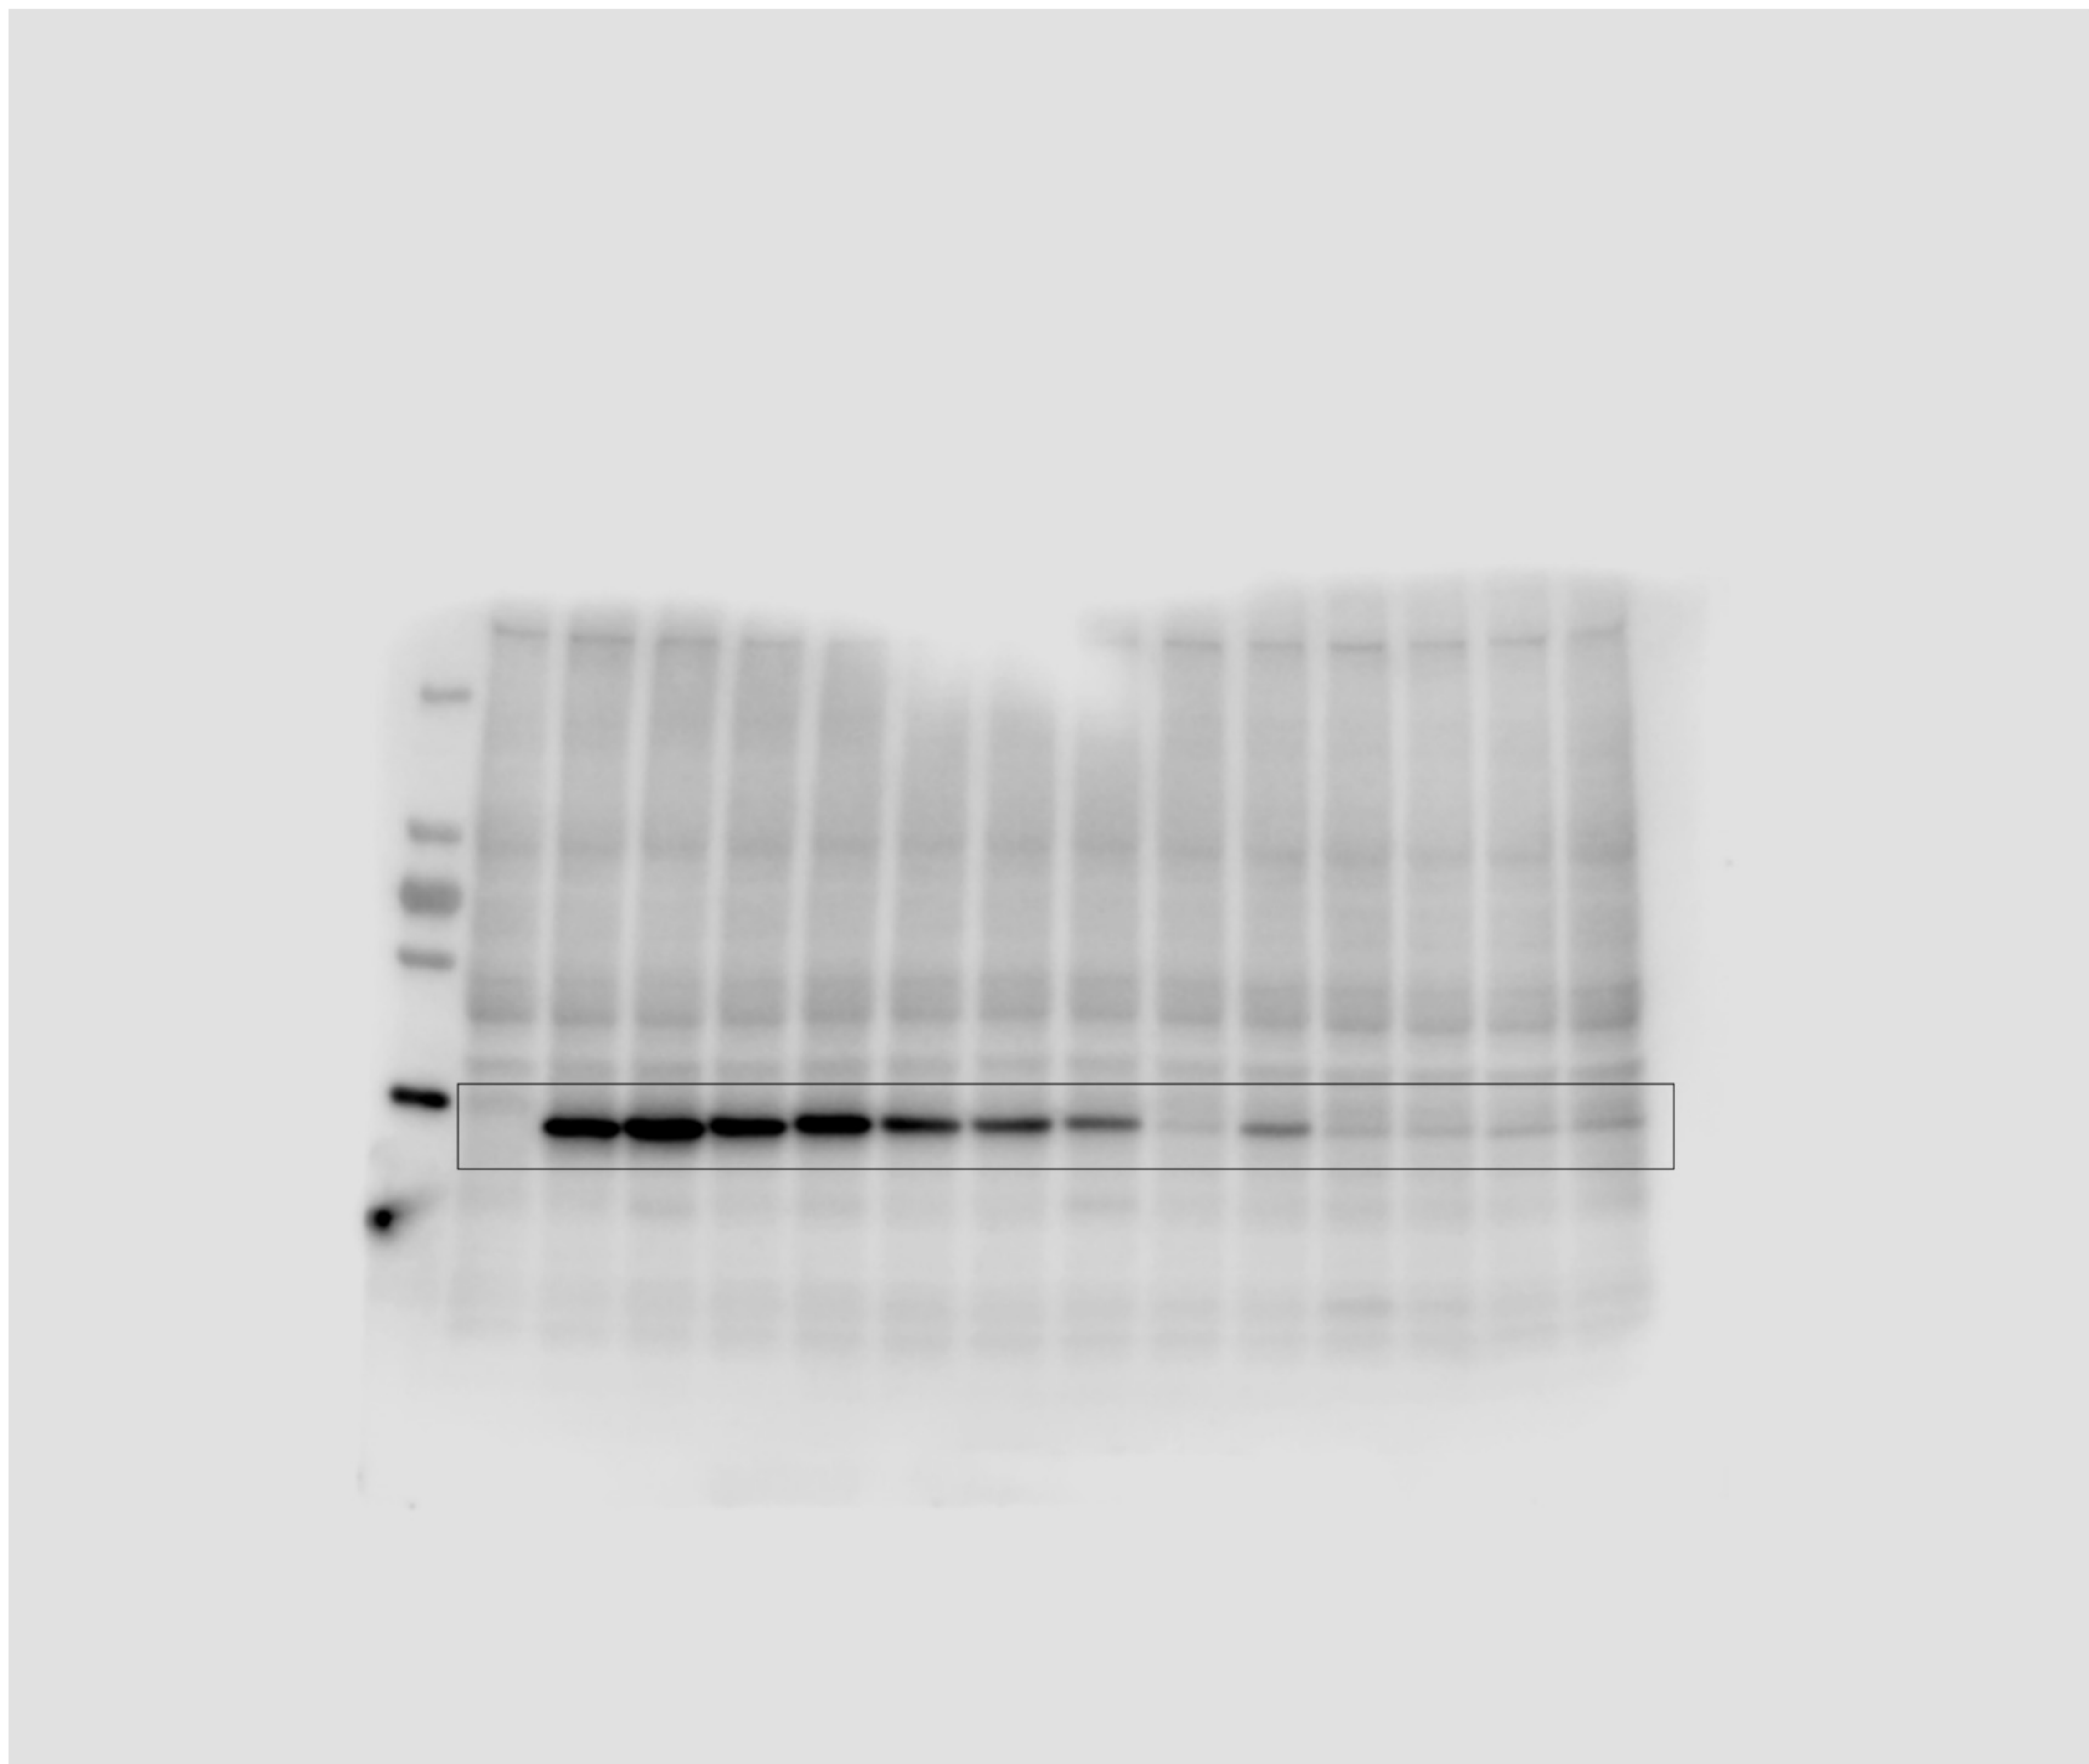

Cropped area for Figure 5A  
HA

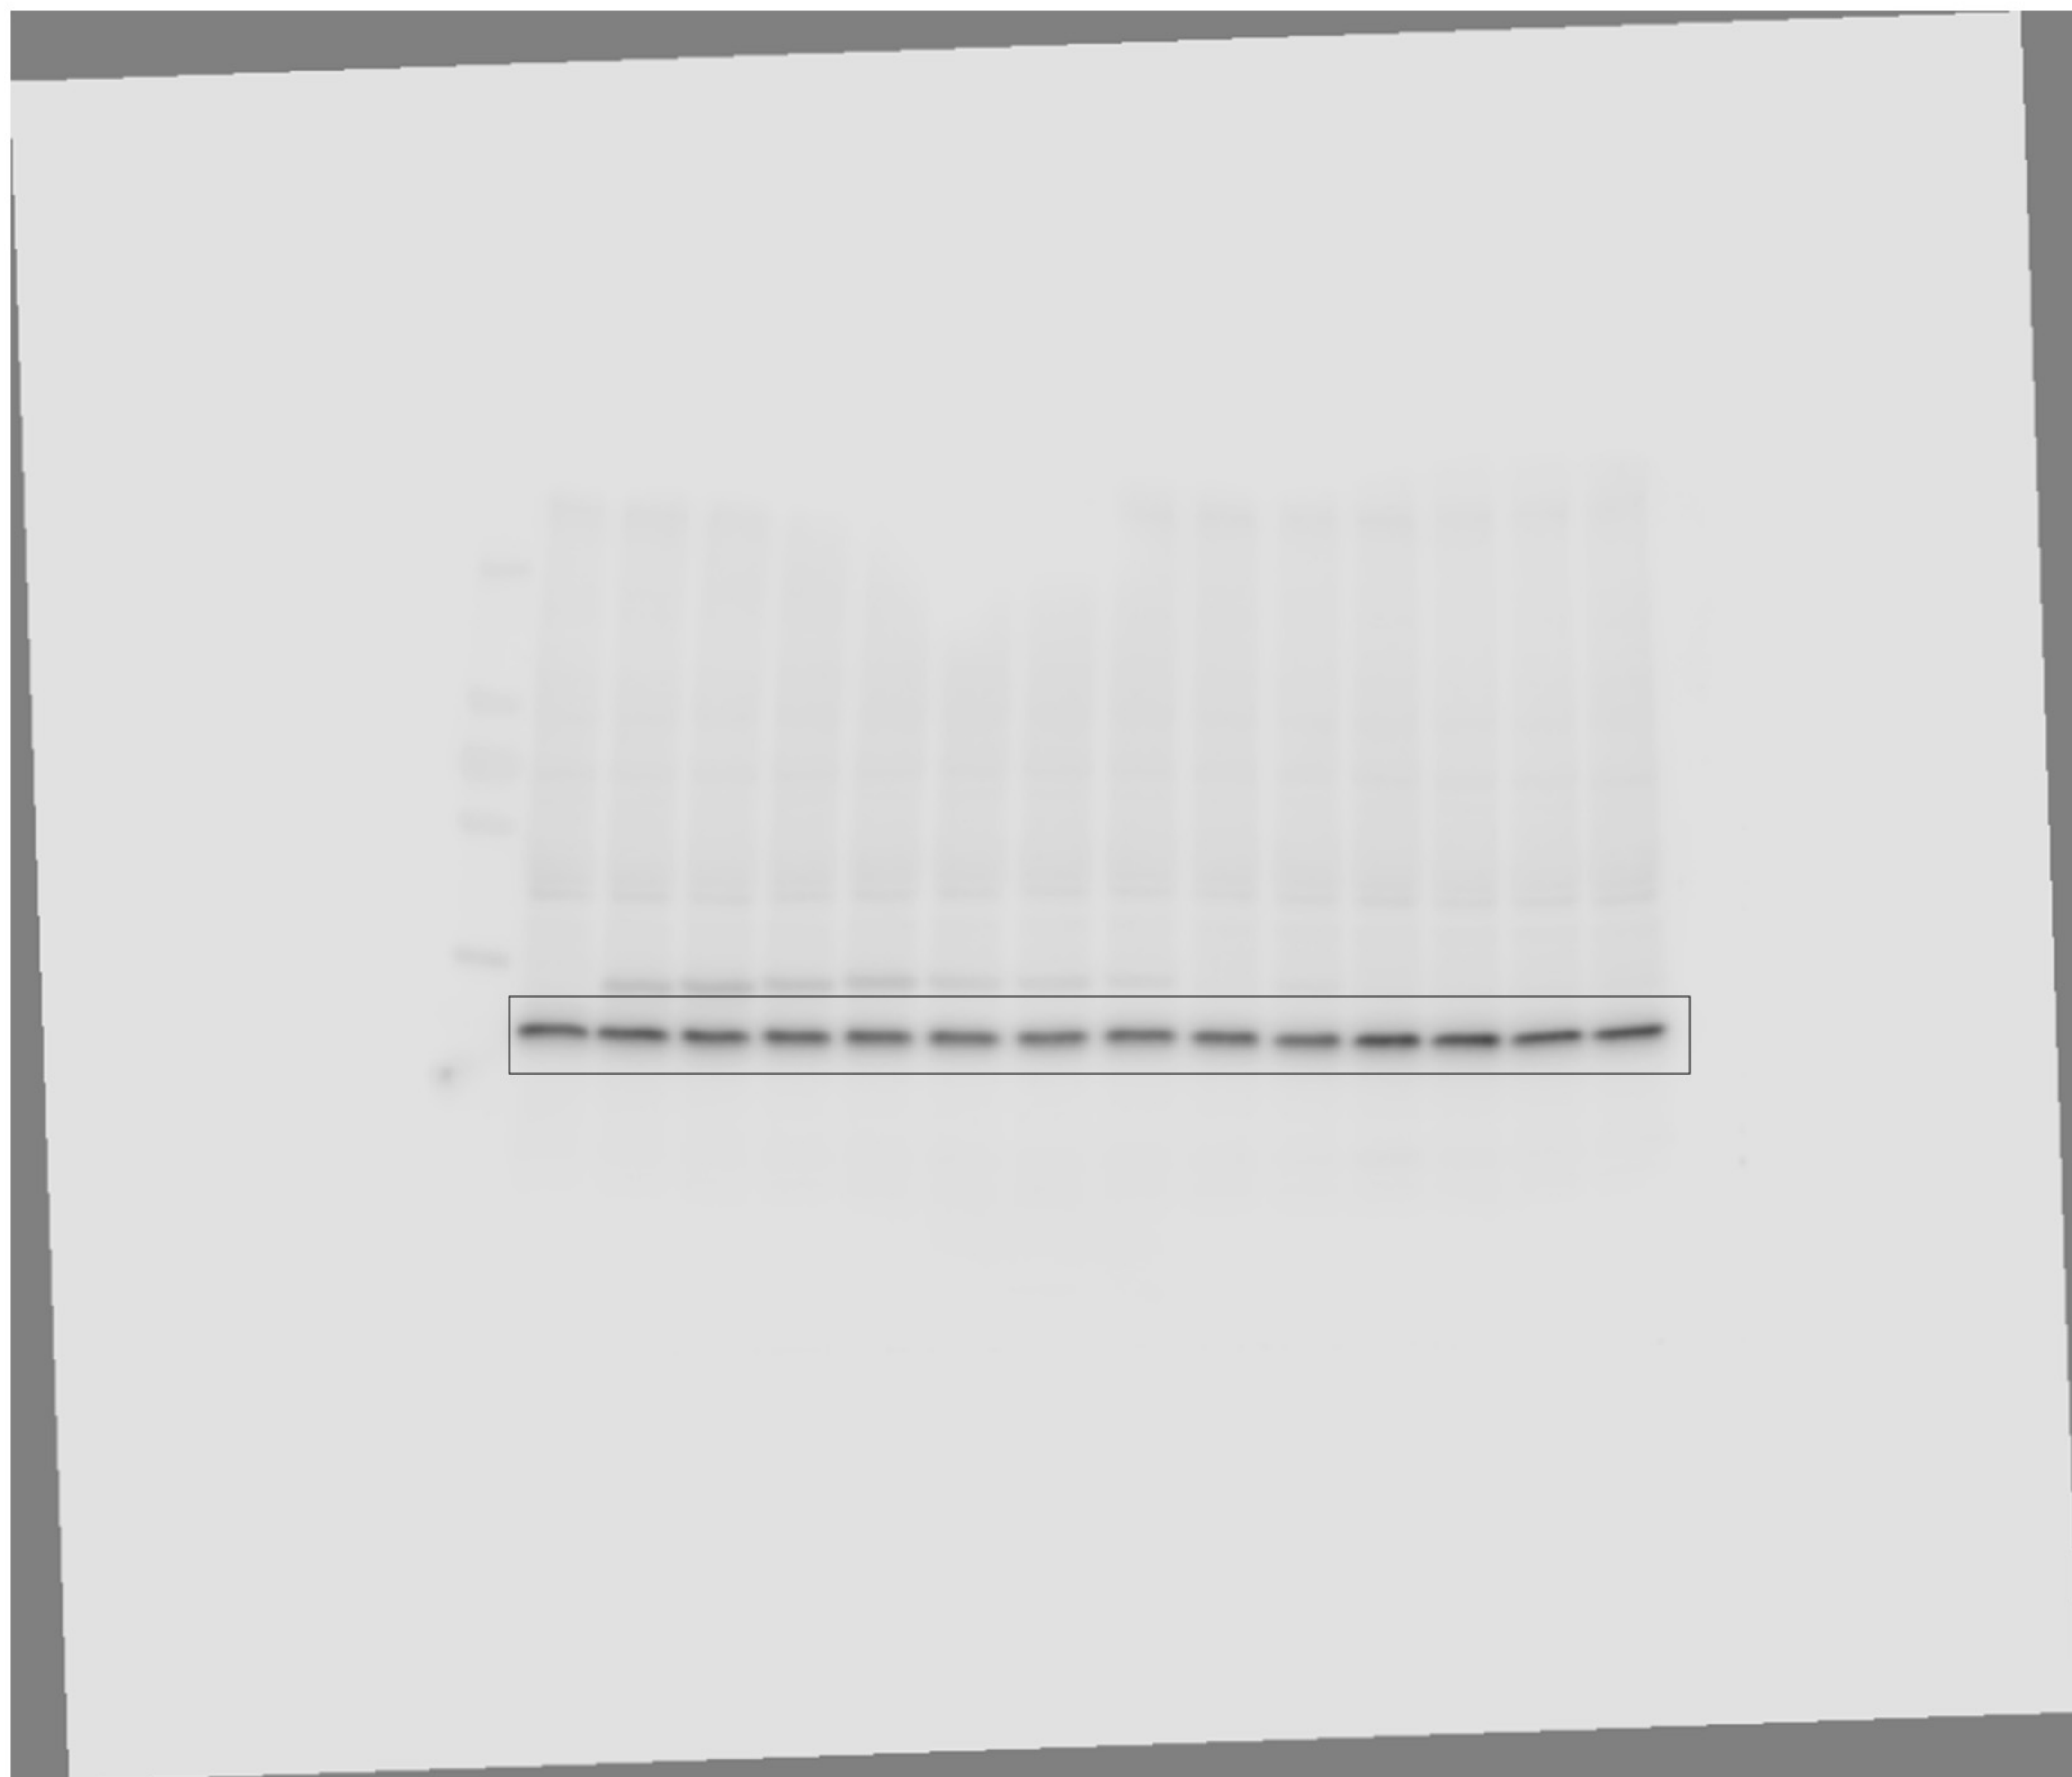

Cropped area for Figure 5A  
TFAM

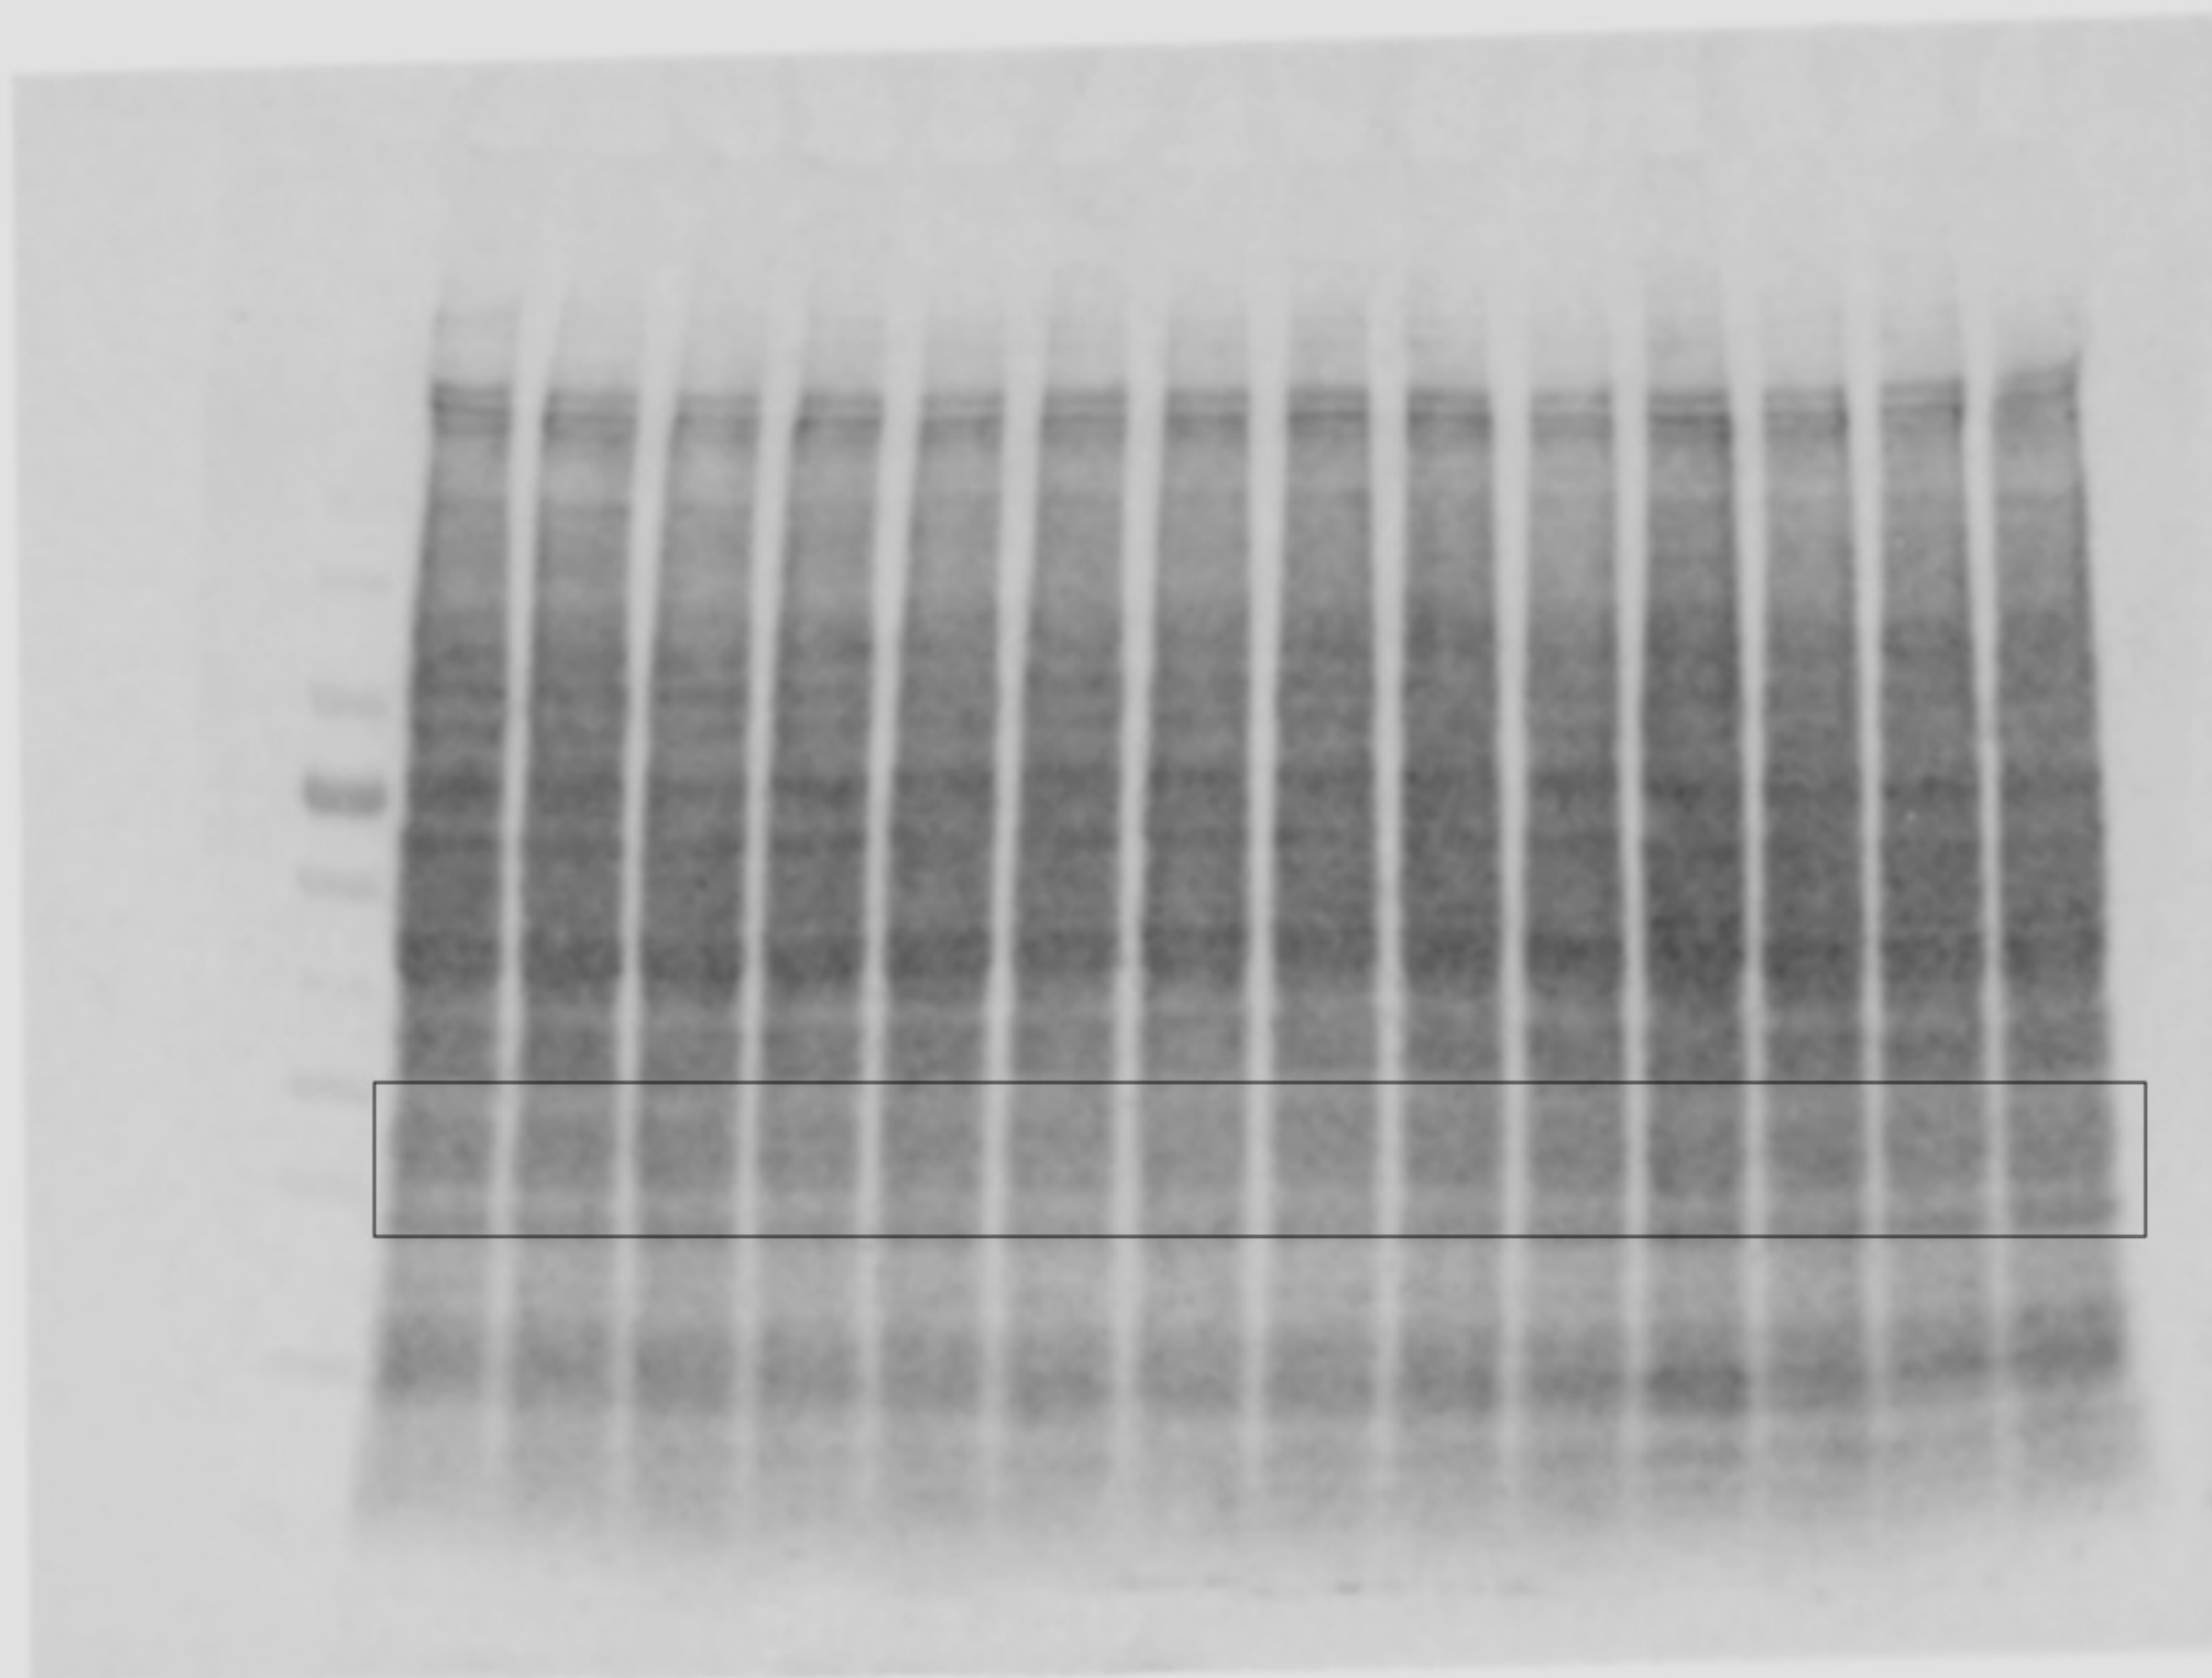

Cropped area for Figure 5A  
Total Protein Stain

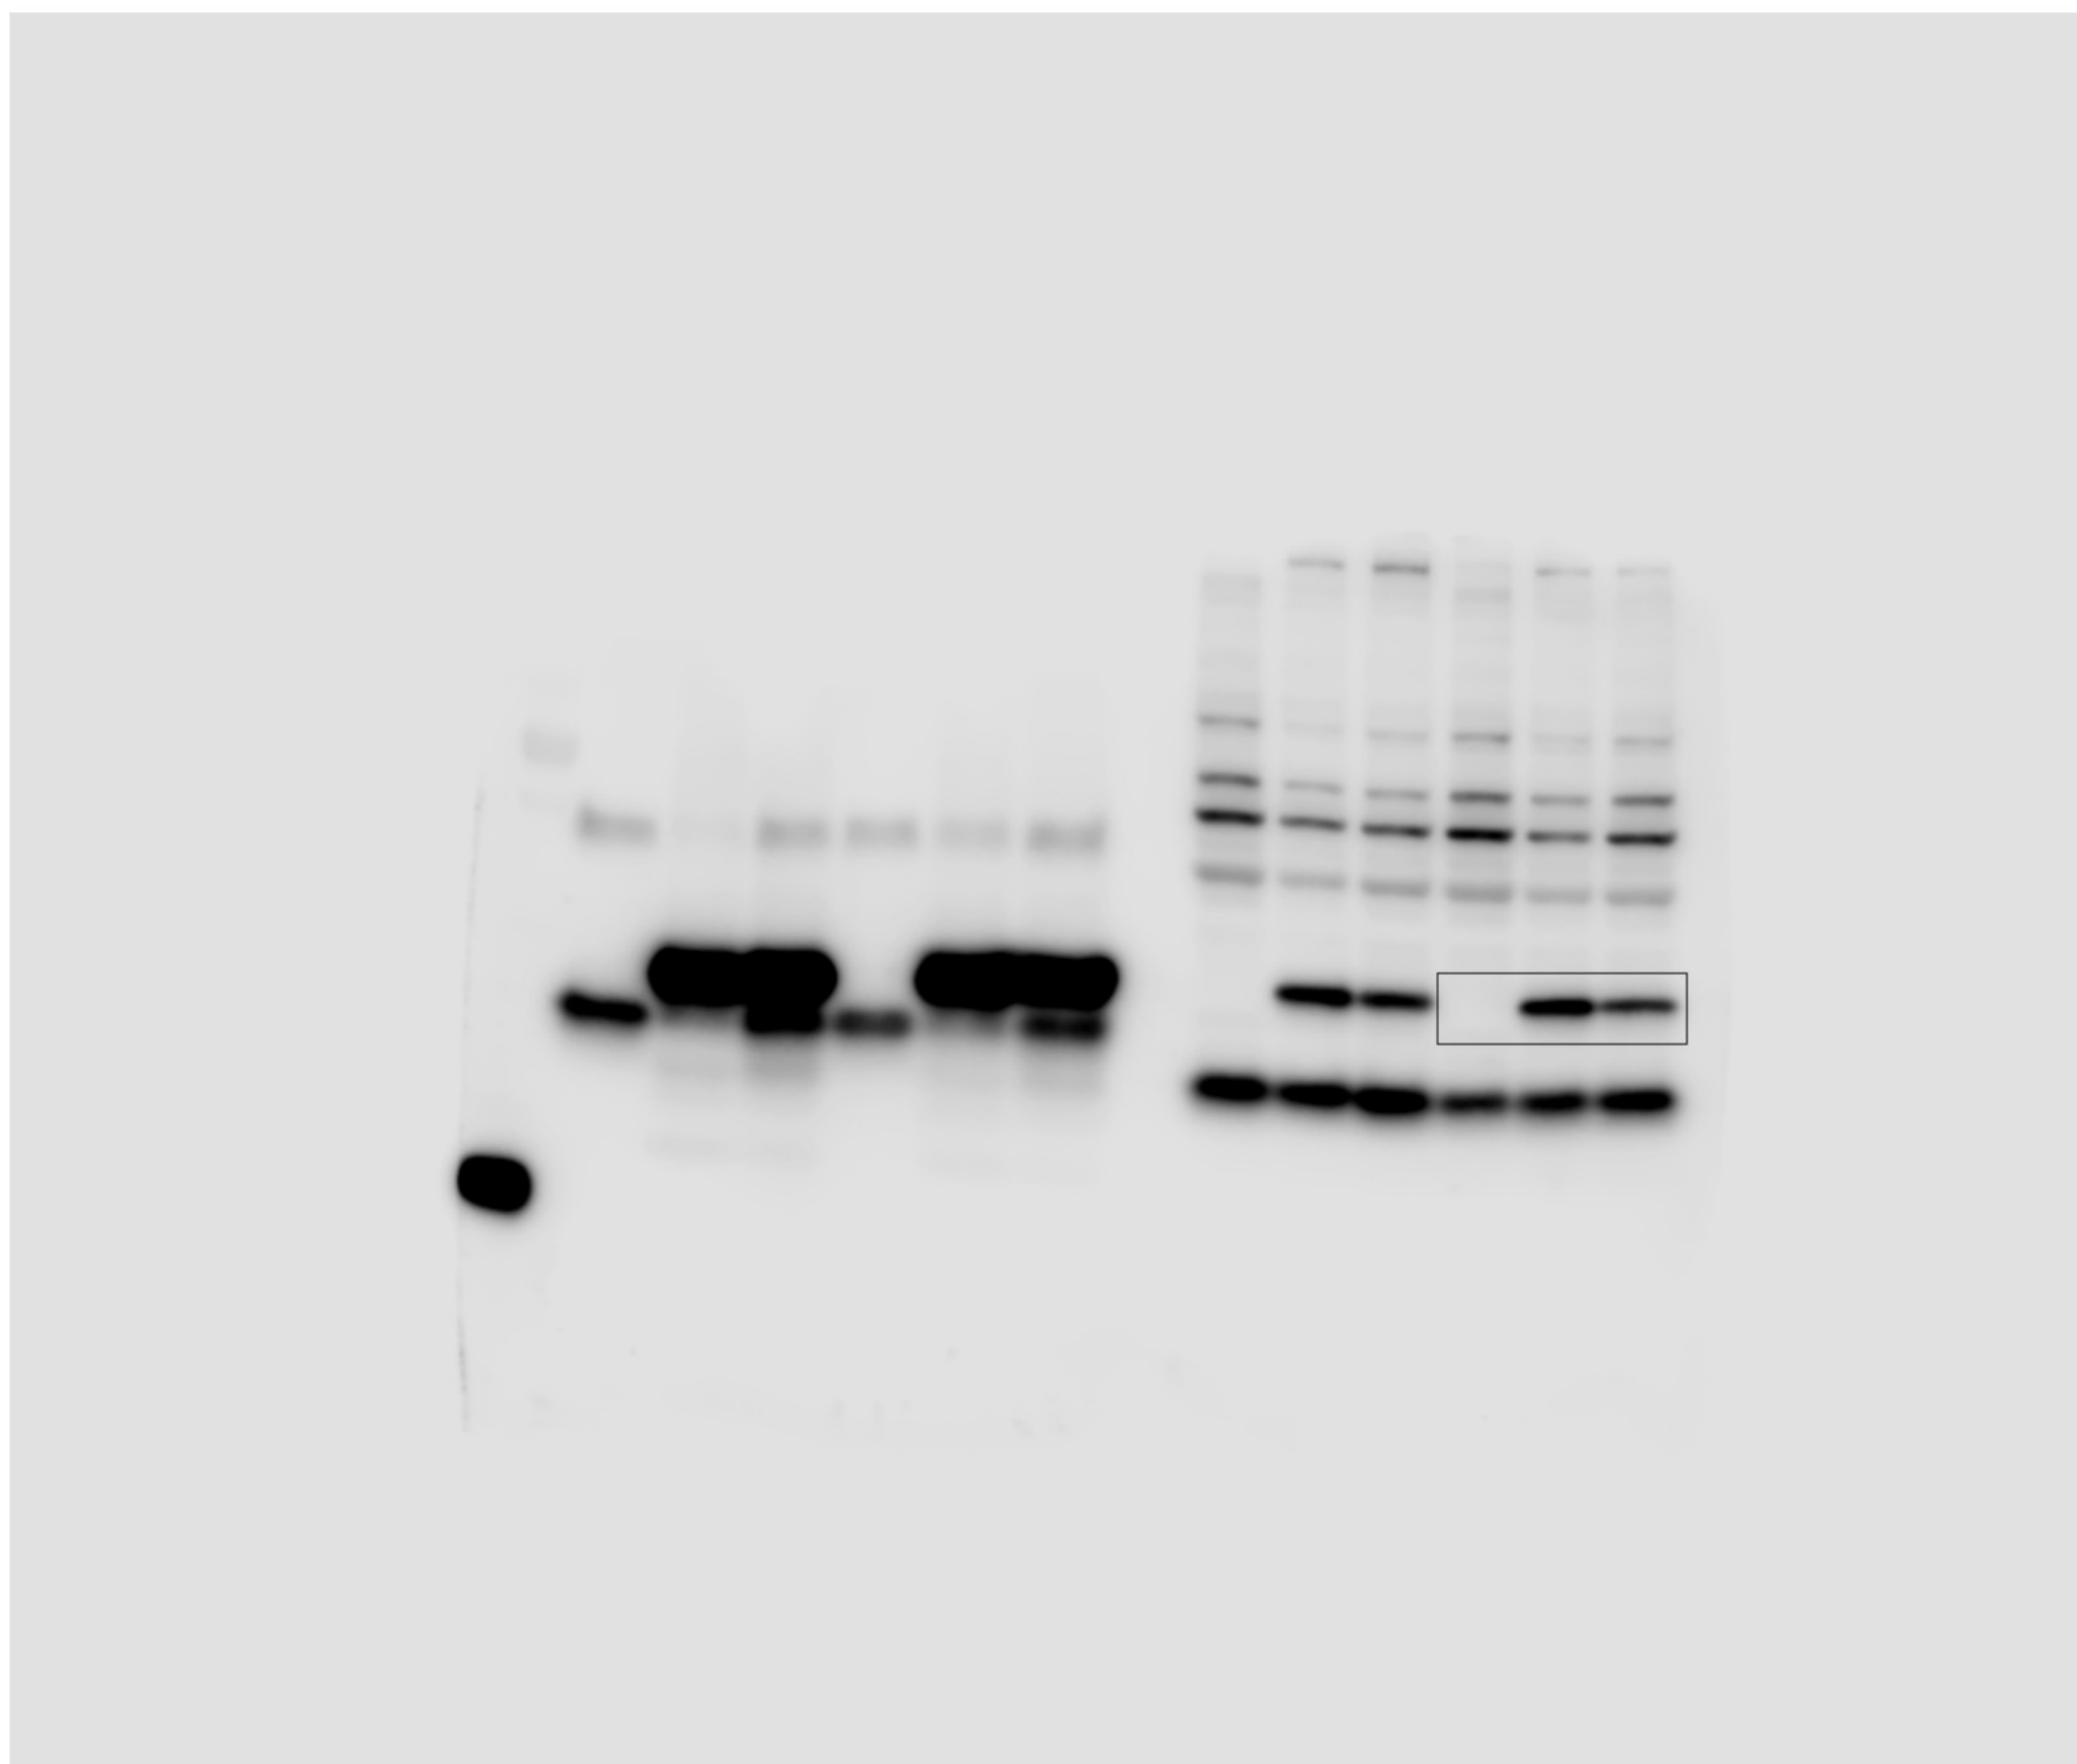

Cropped area for Figure 5B  
Input, anti-HA

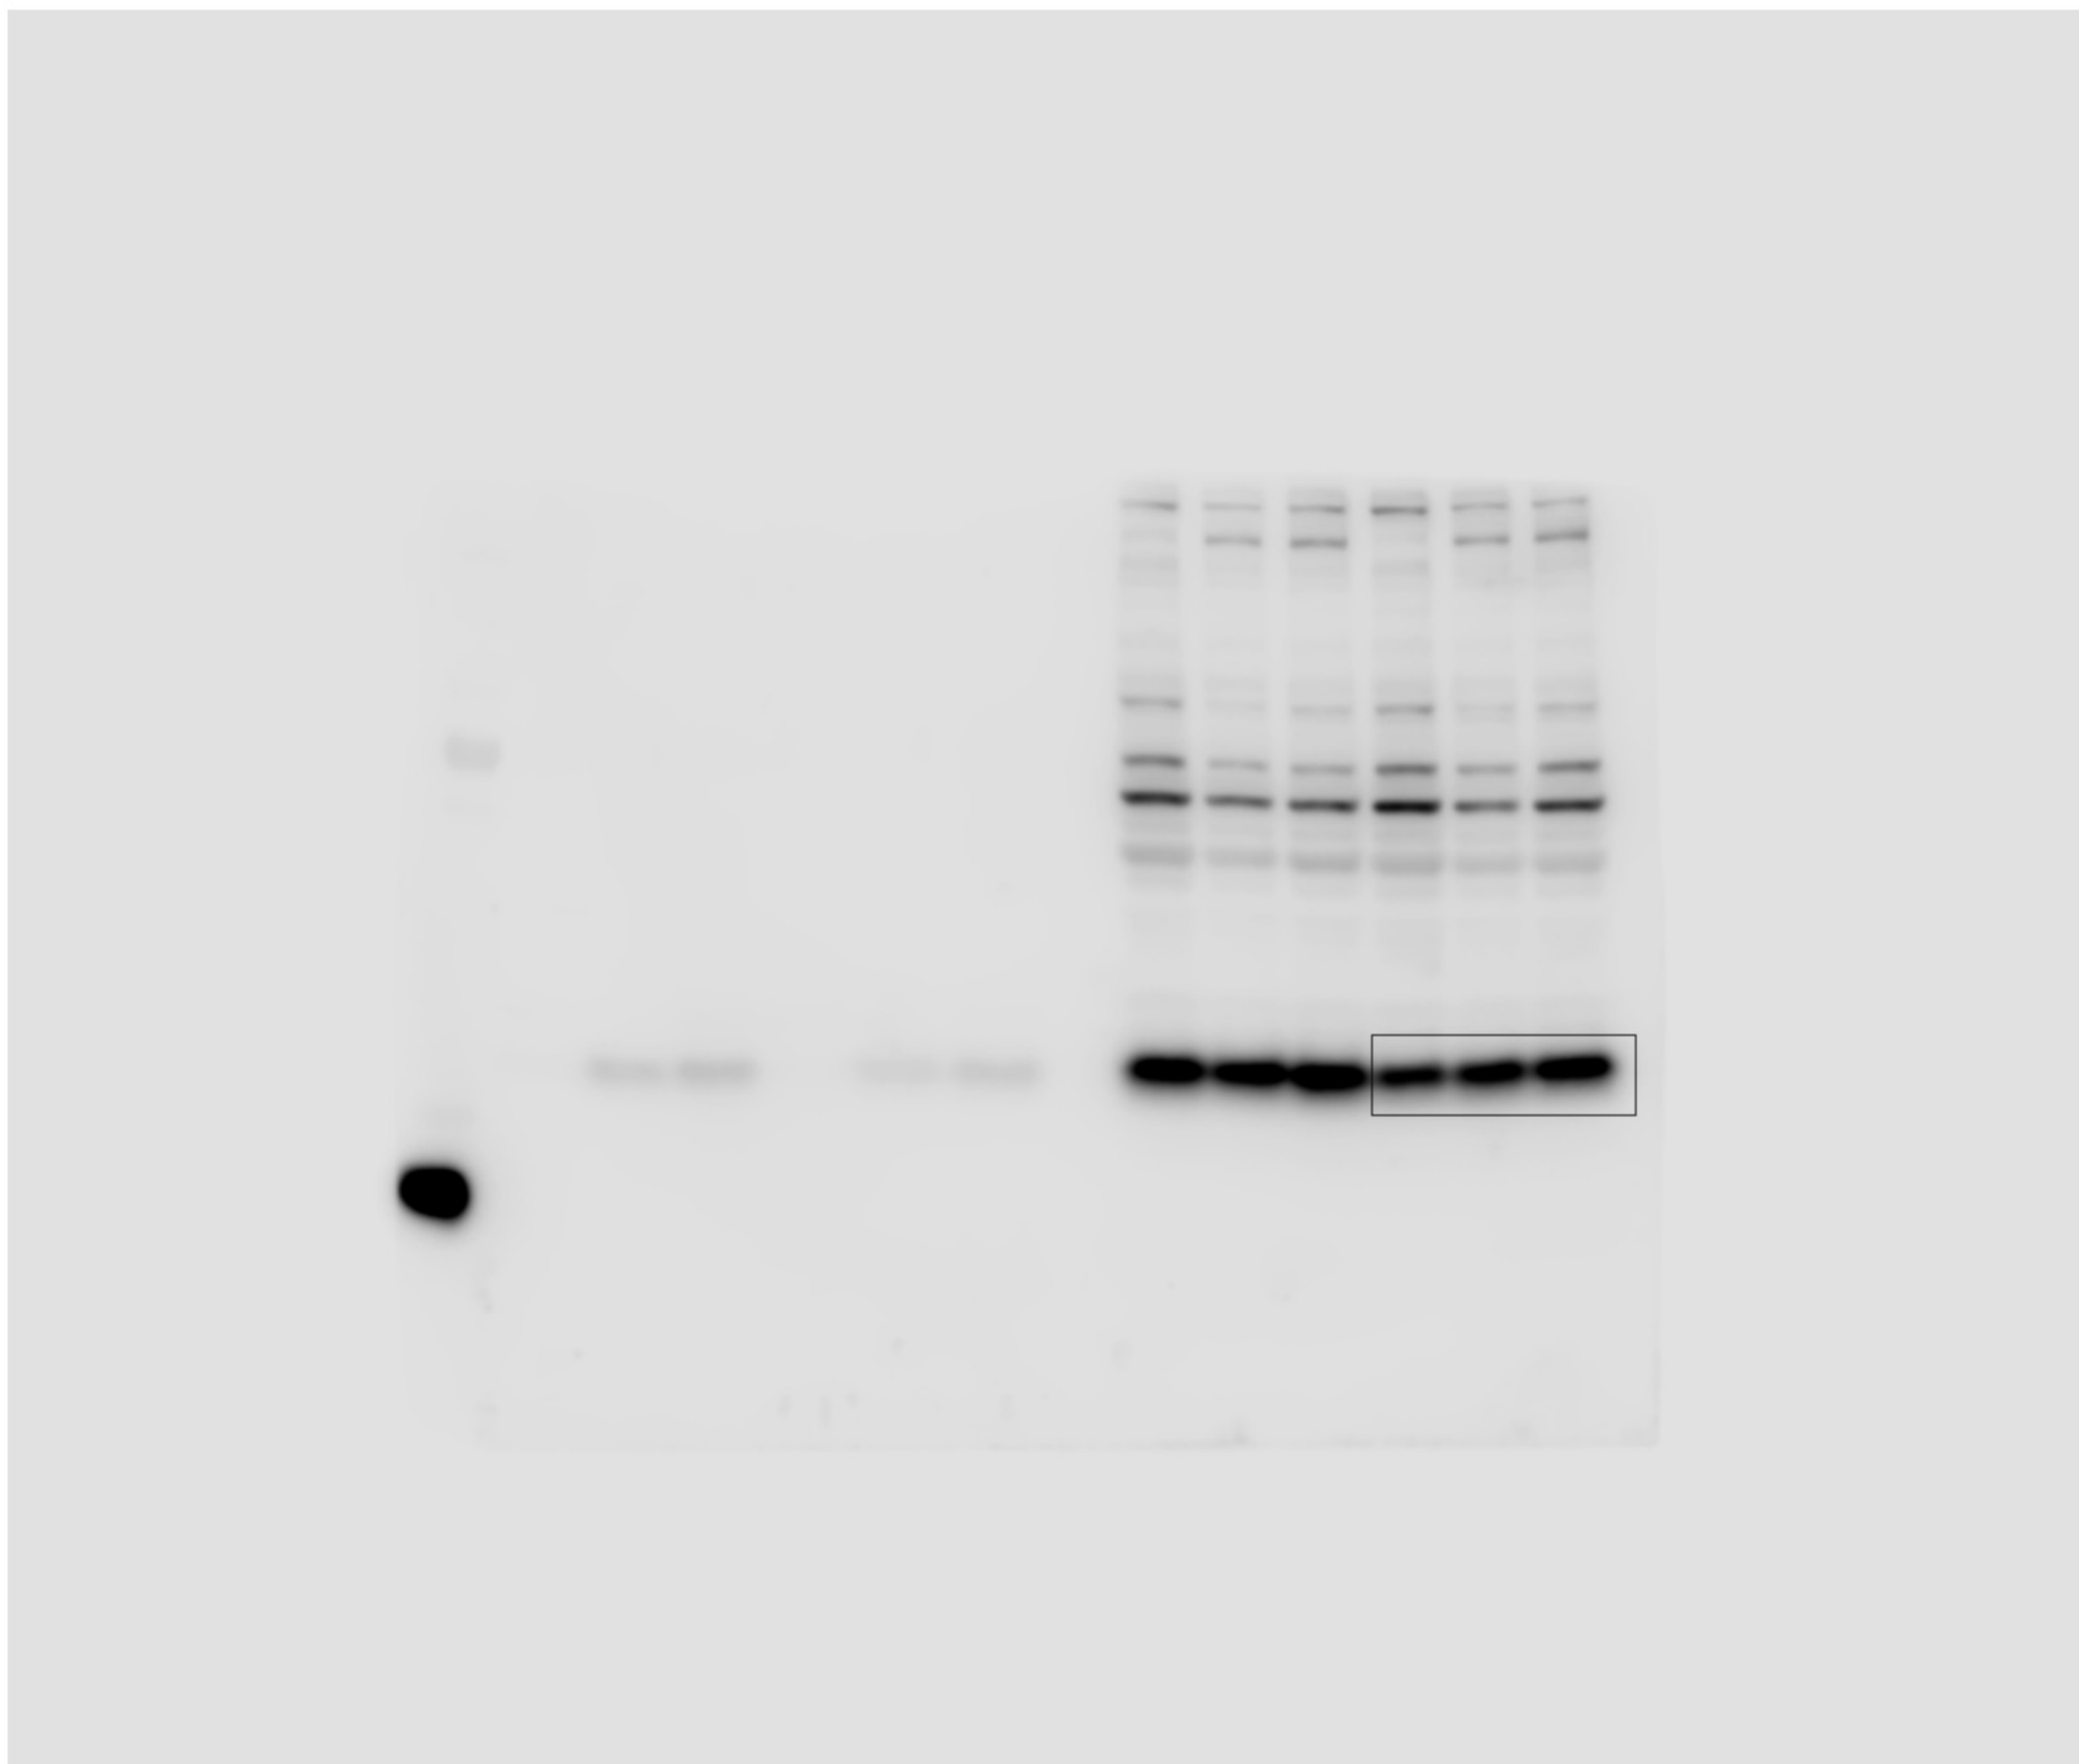

Cropped area for Figure 5B  
Input, Tim22

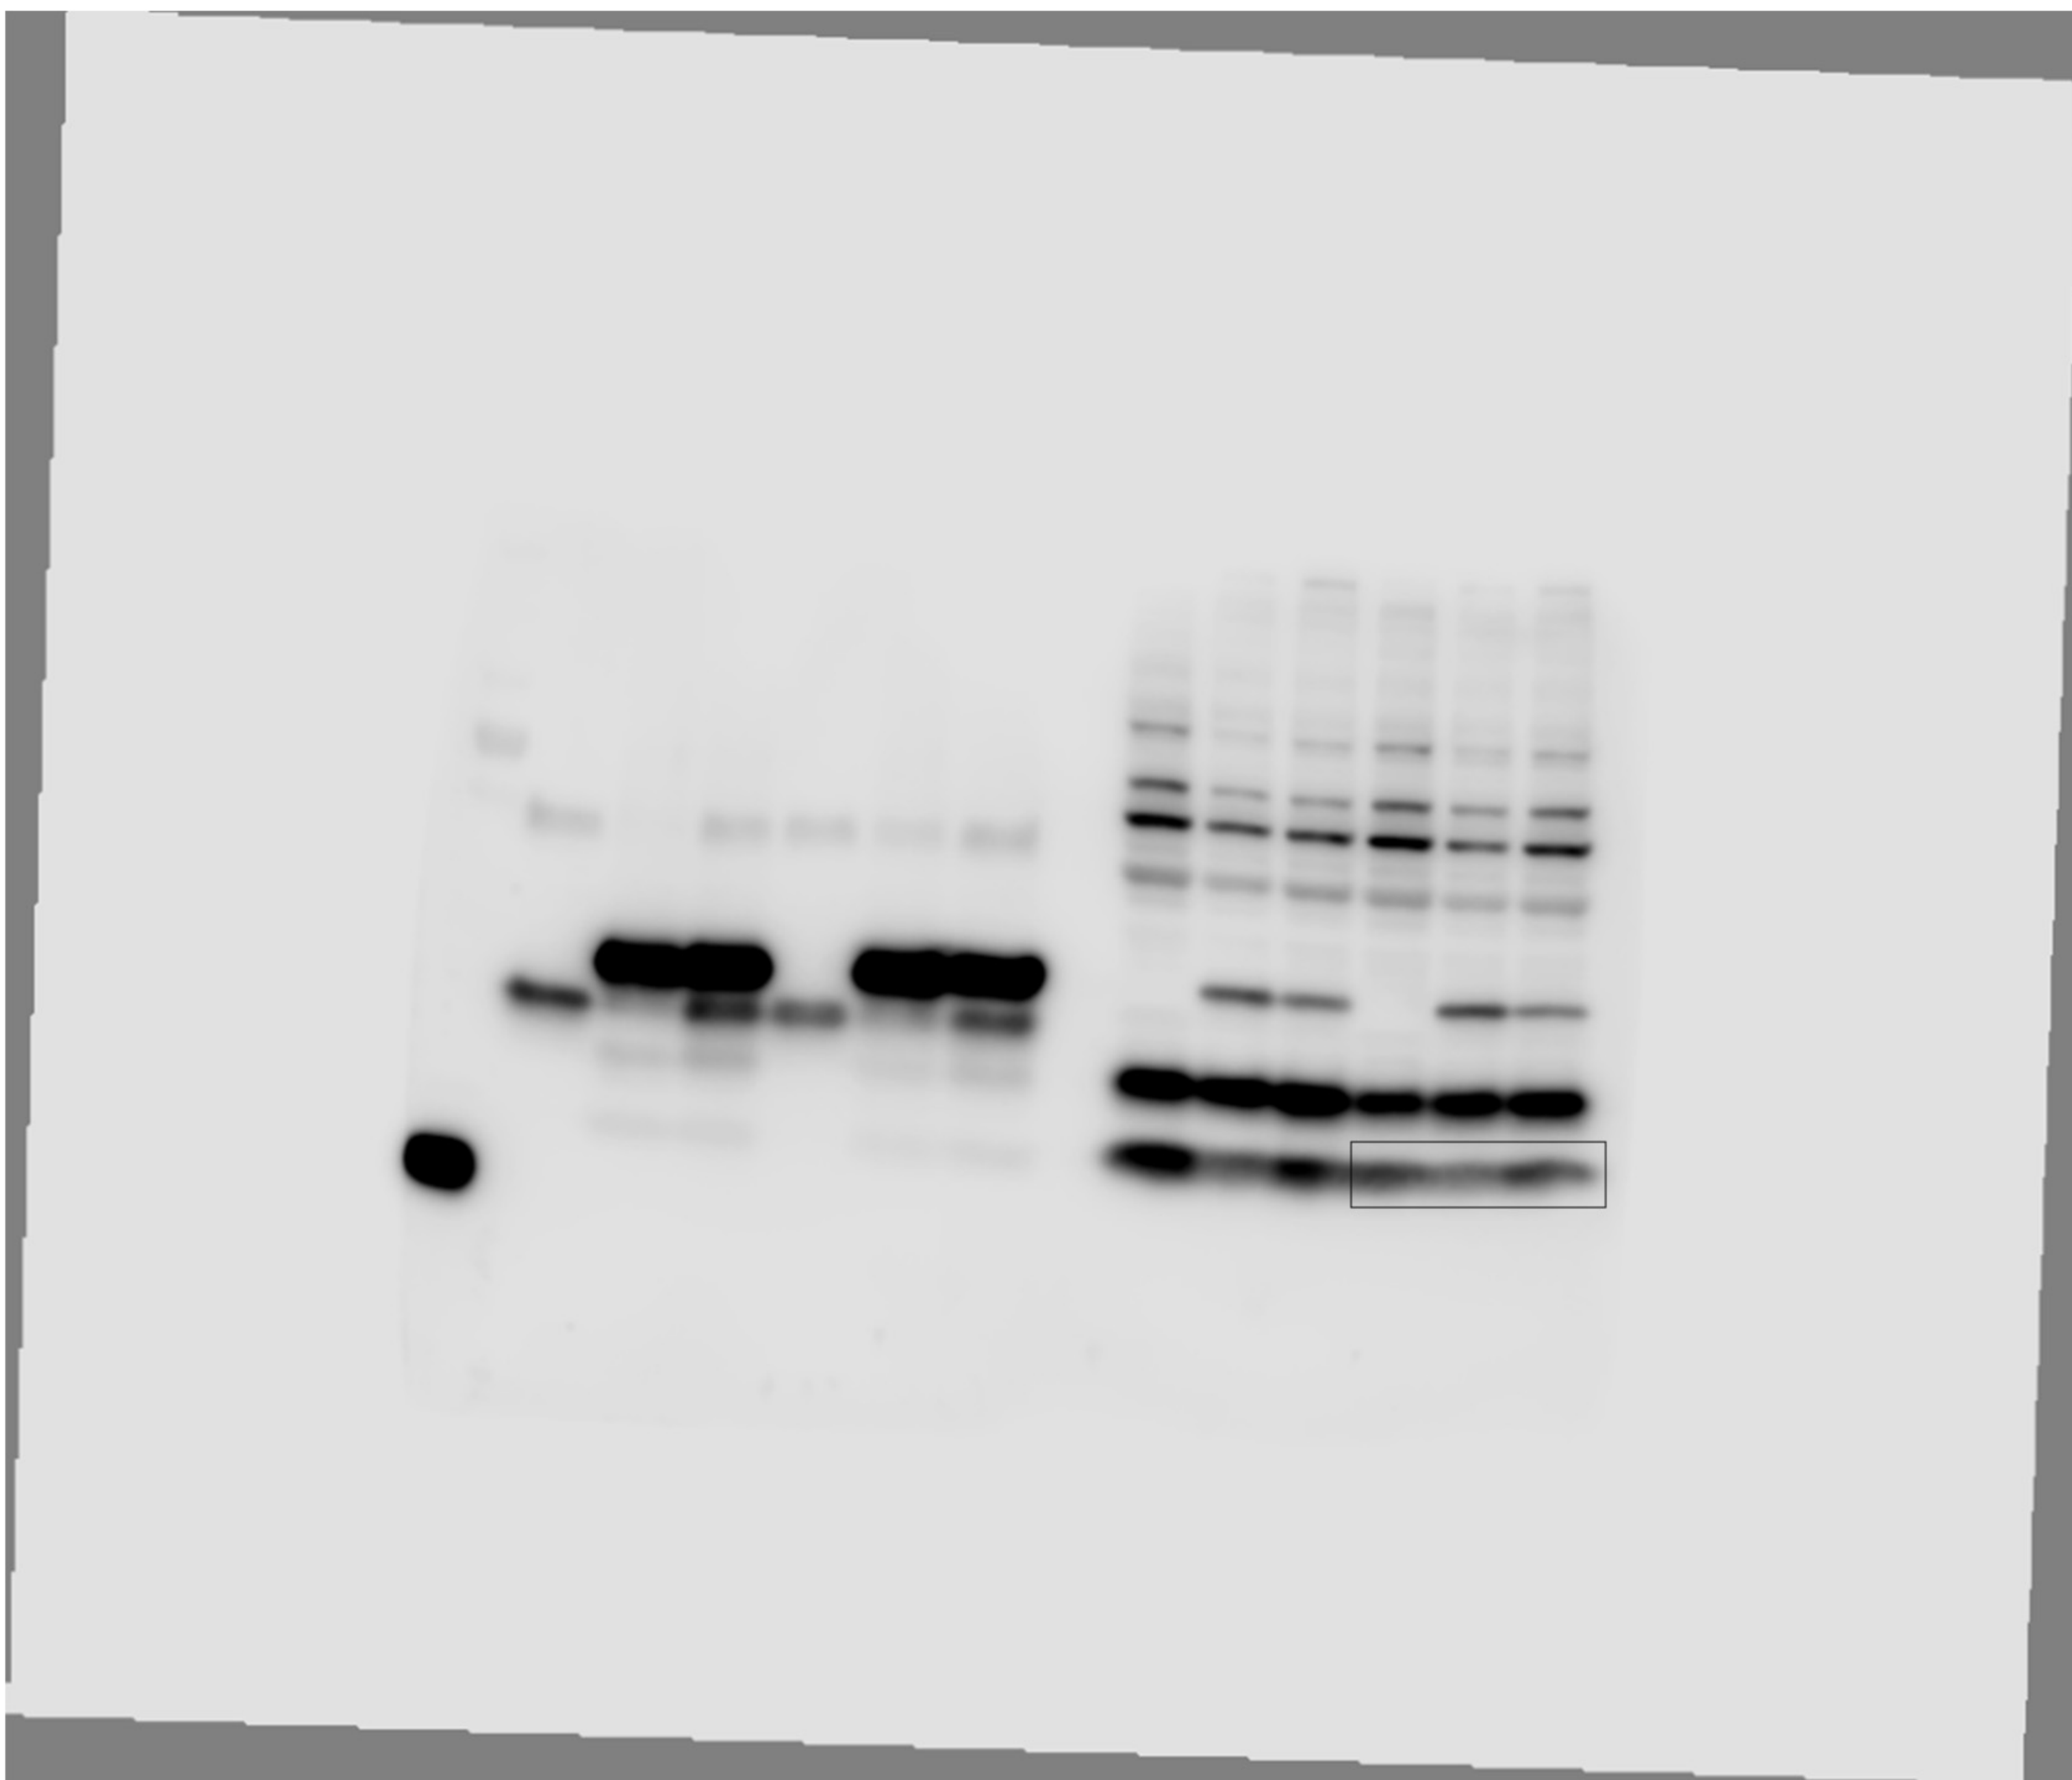

Cropped area for Figure 5B  
Input, Tom20

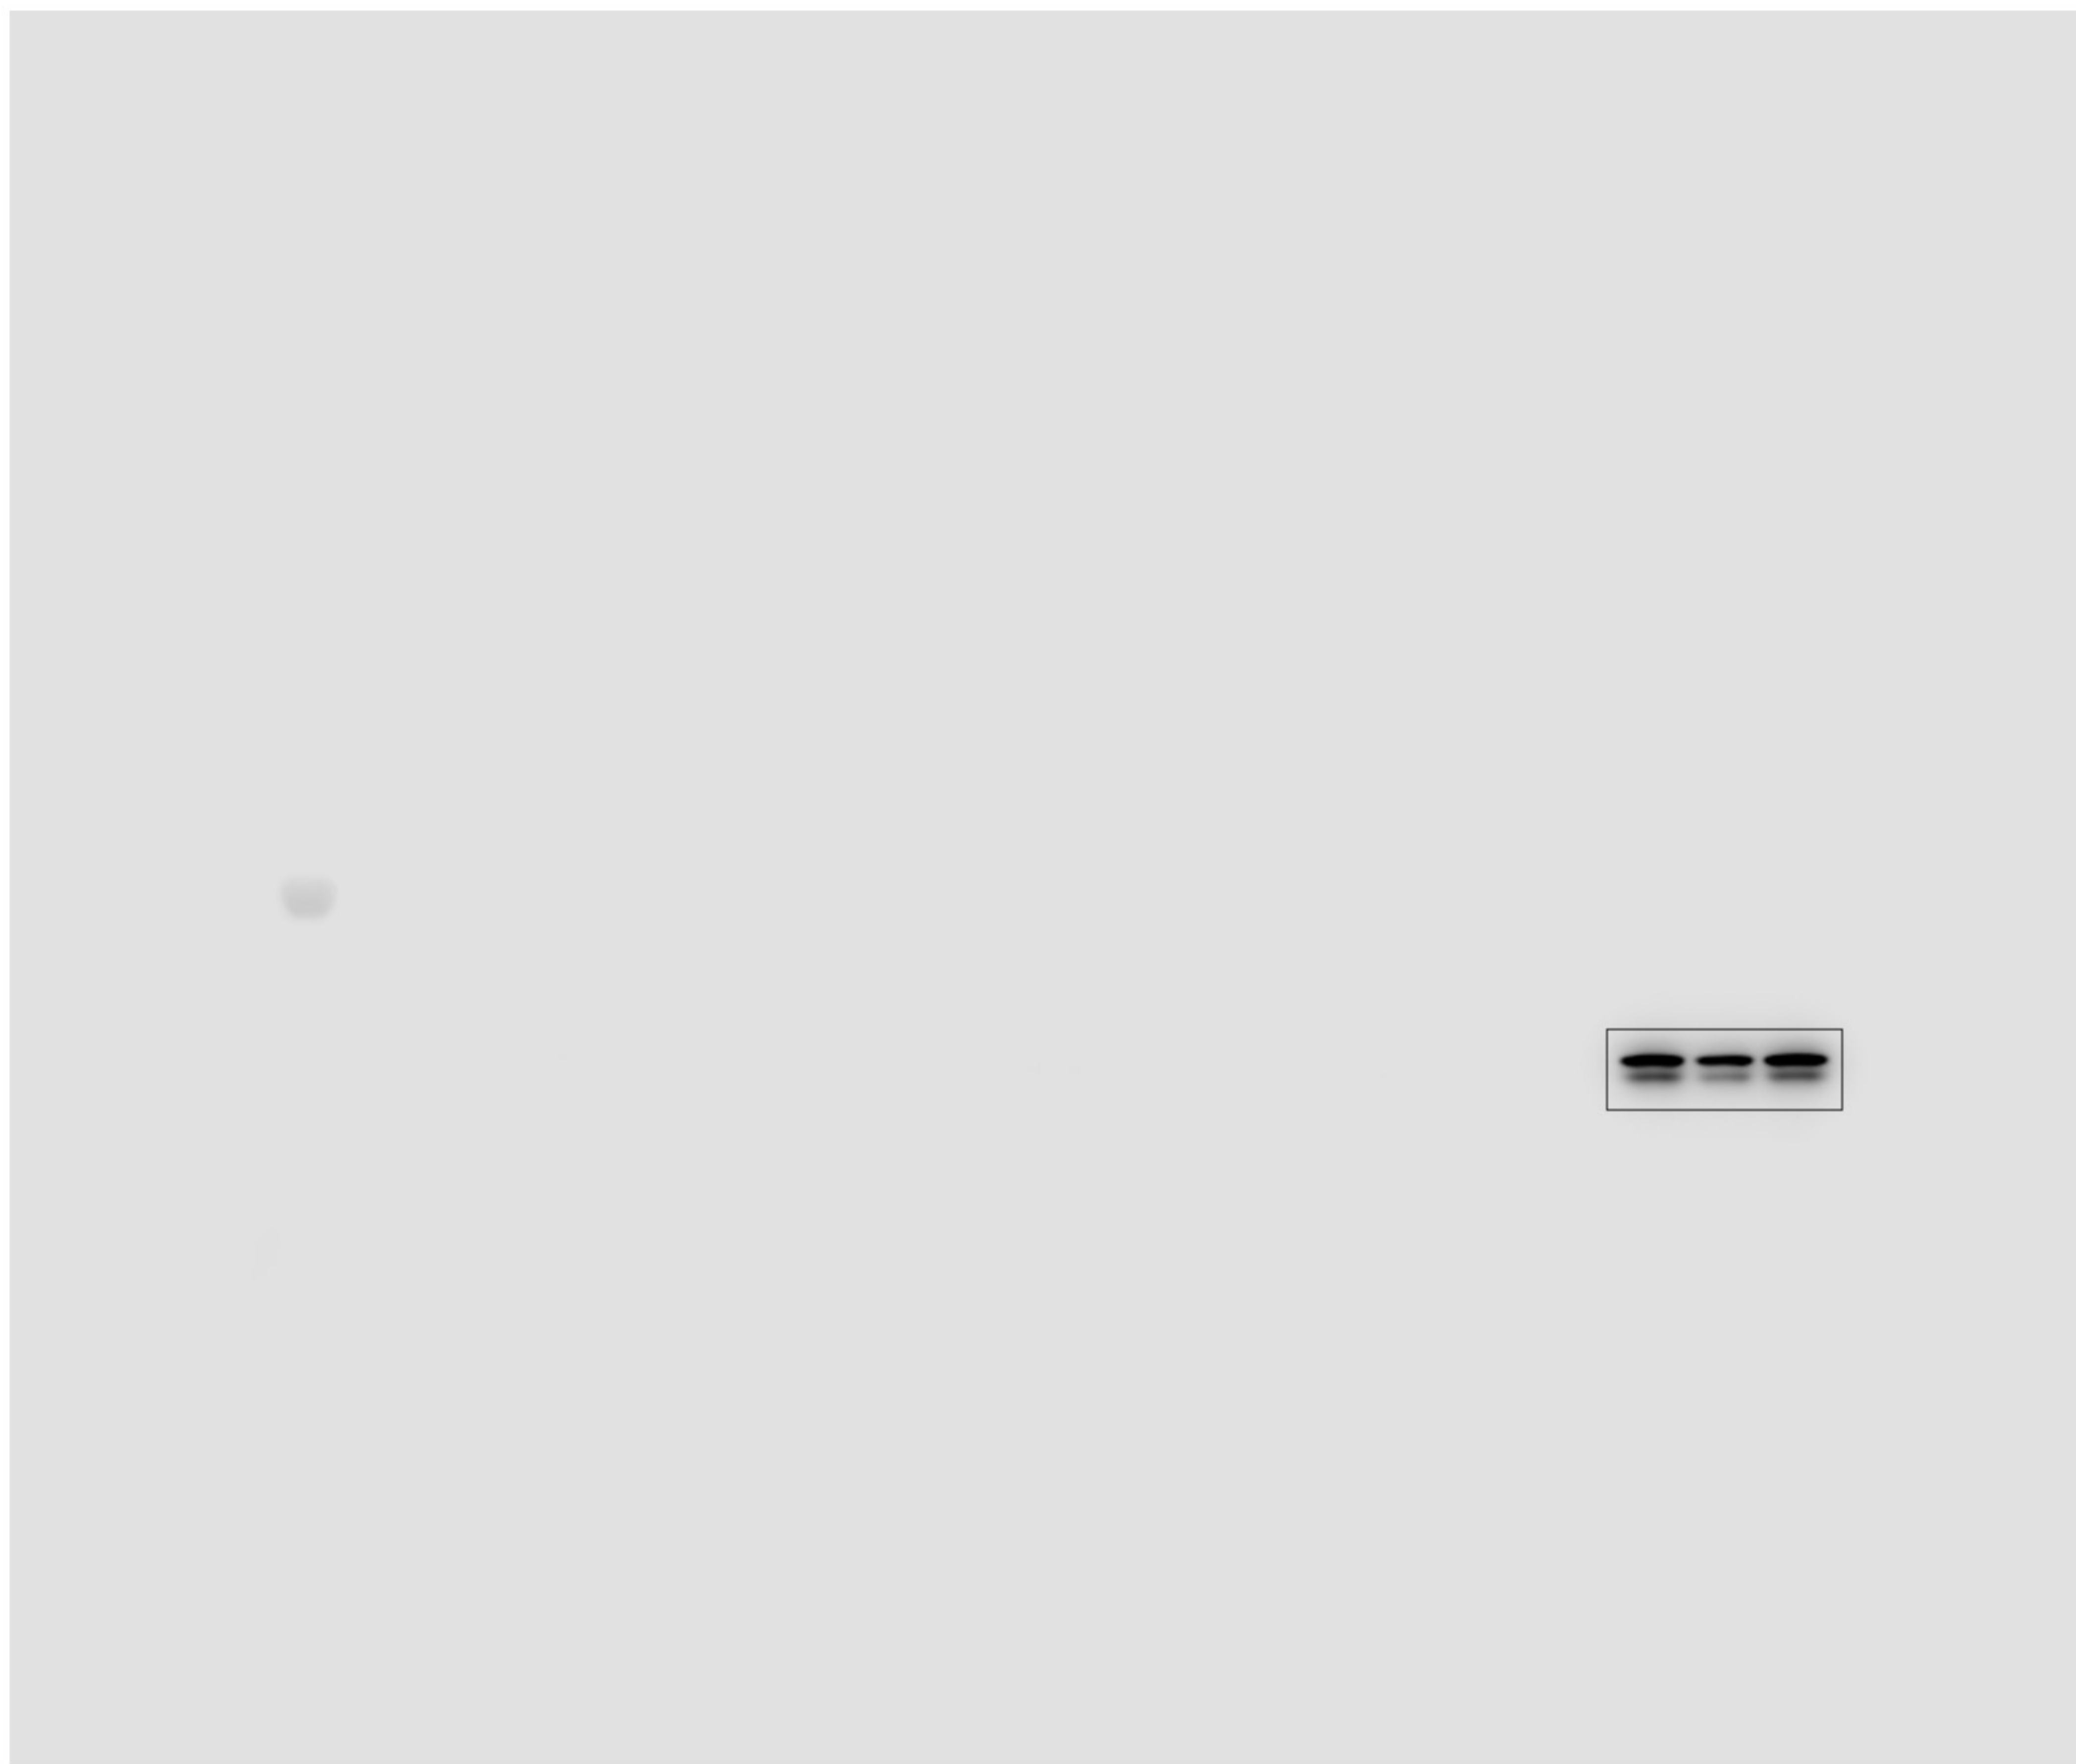

Cropped area for Figure 5B  
Input, Tom40

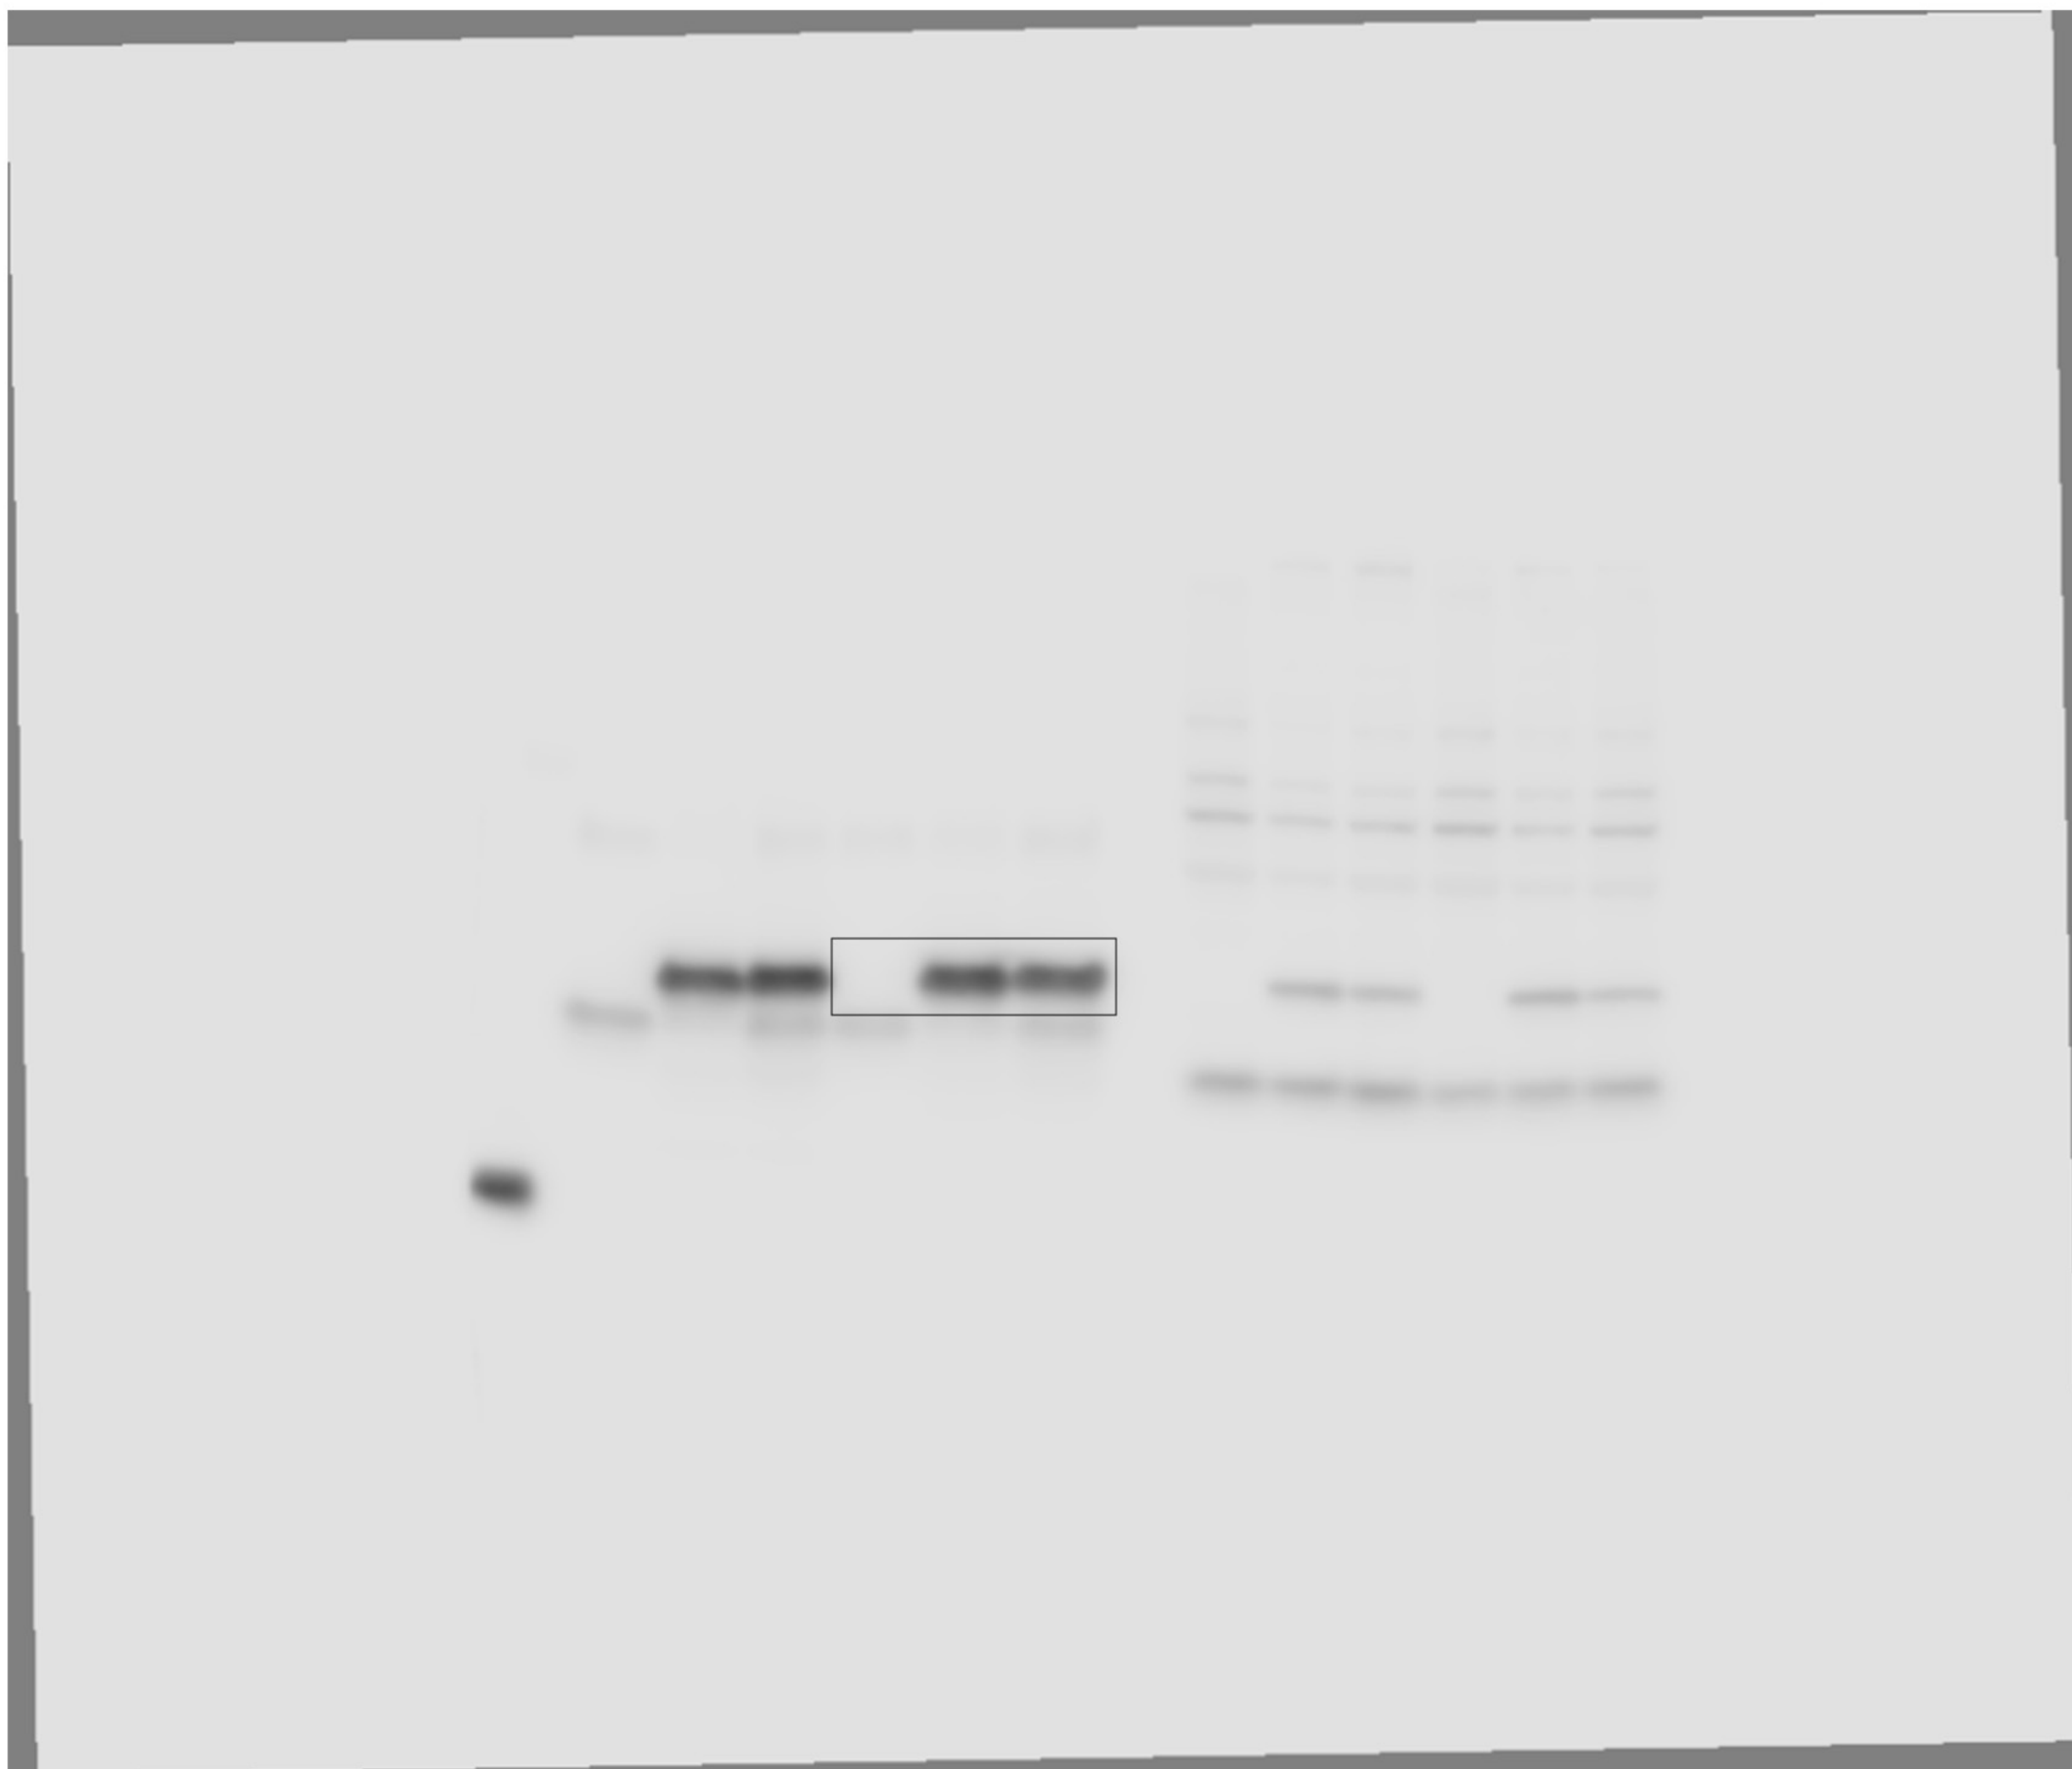

Cropped area for Figure 5B  
IP:HA, anti-HA



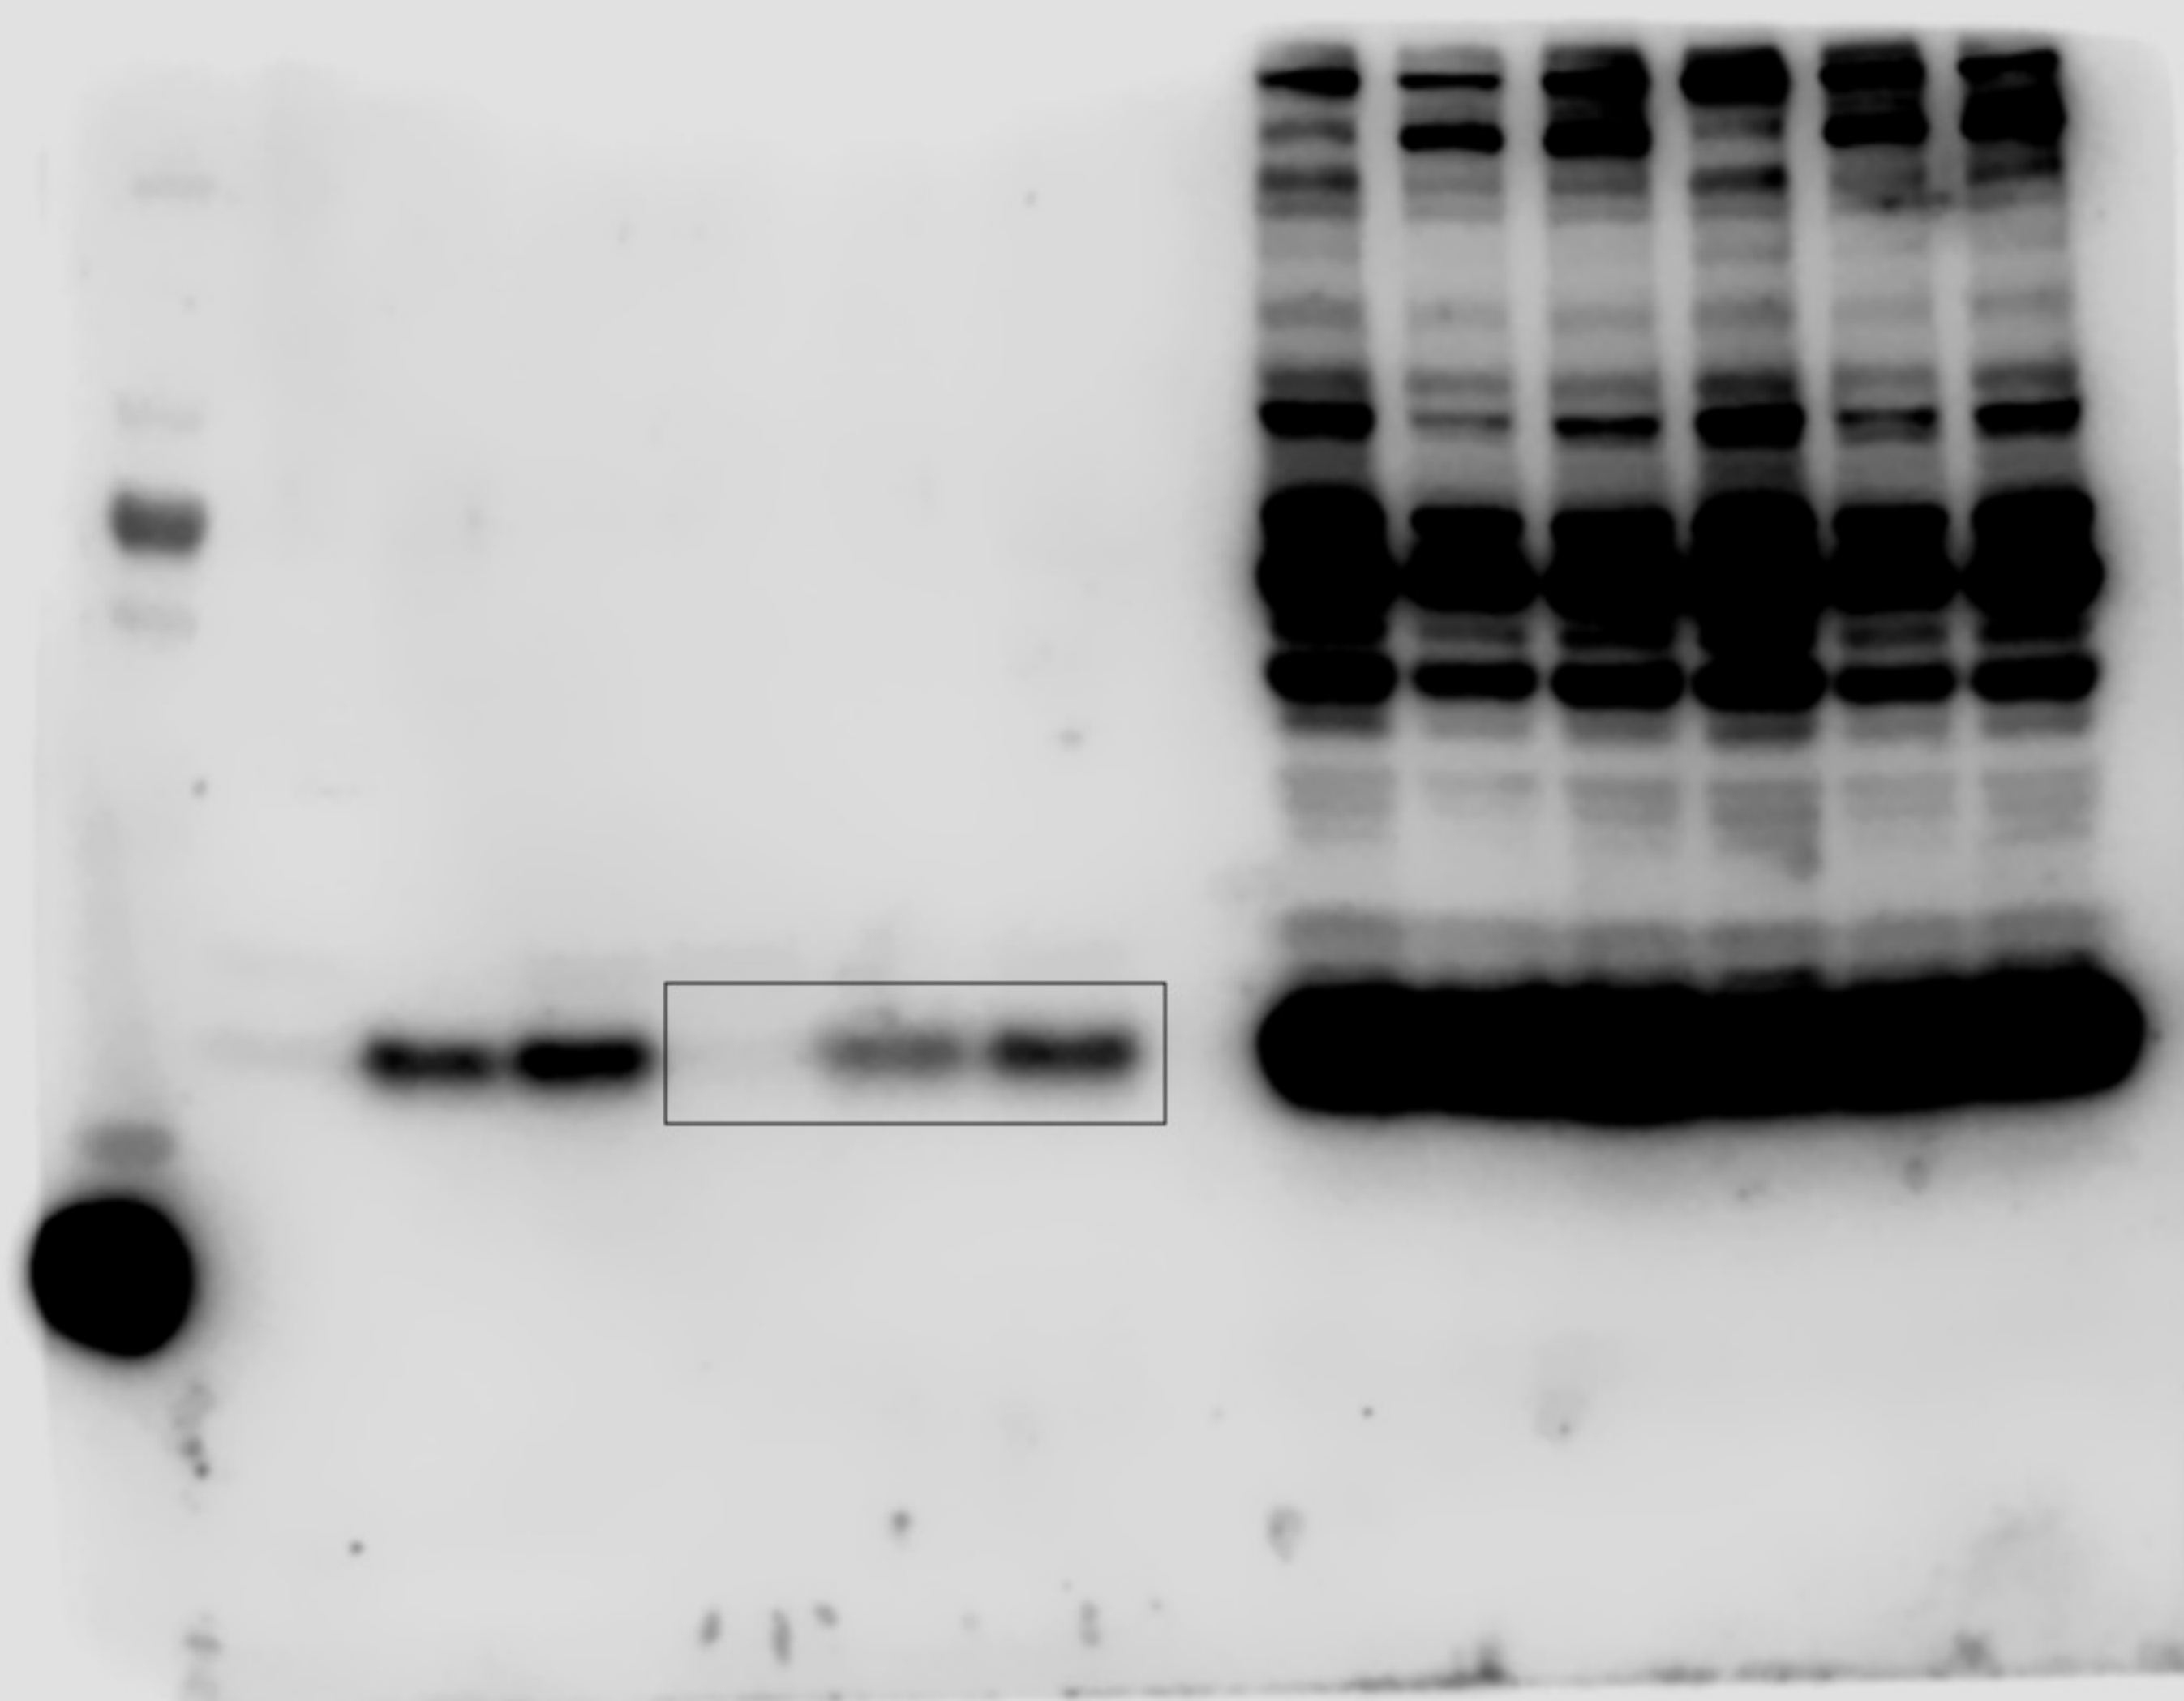

Cropped area for Figure 5B  
IP: HA, Tim22

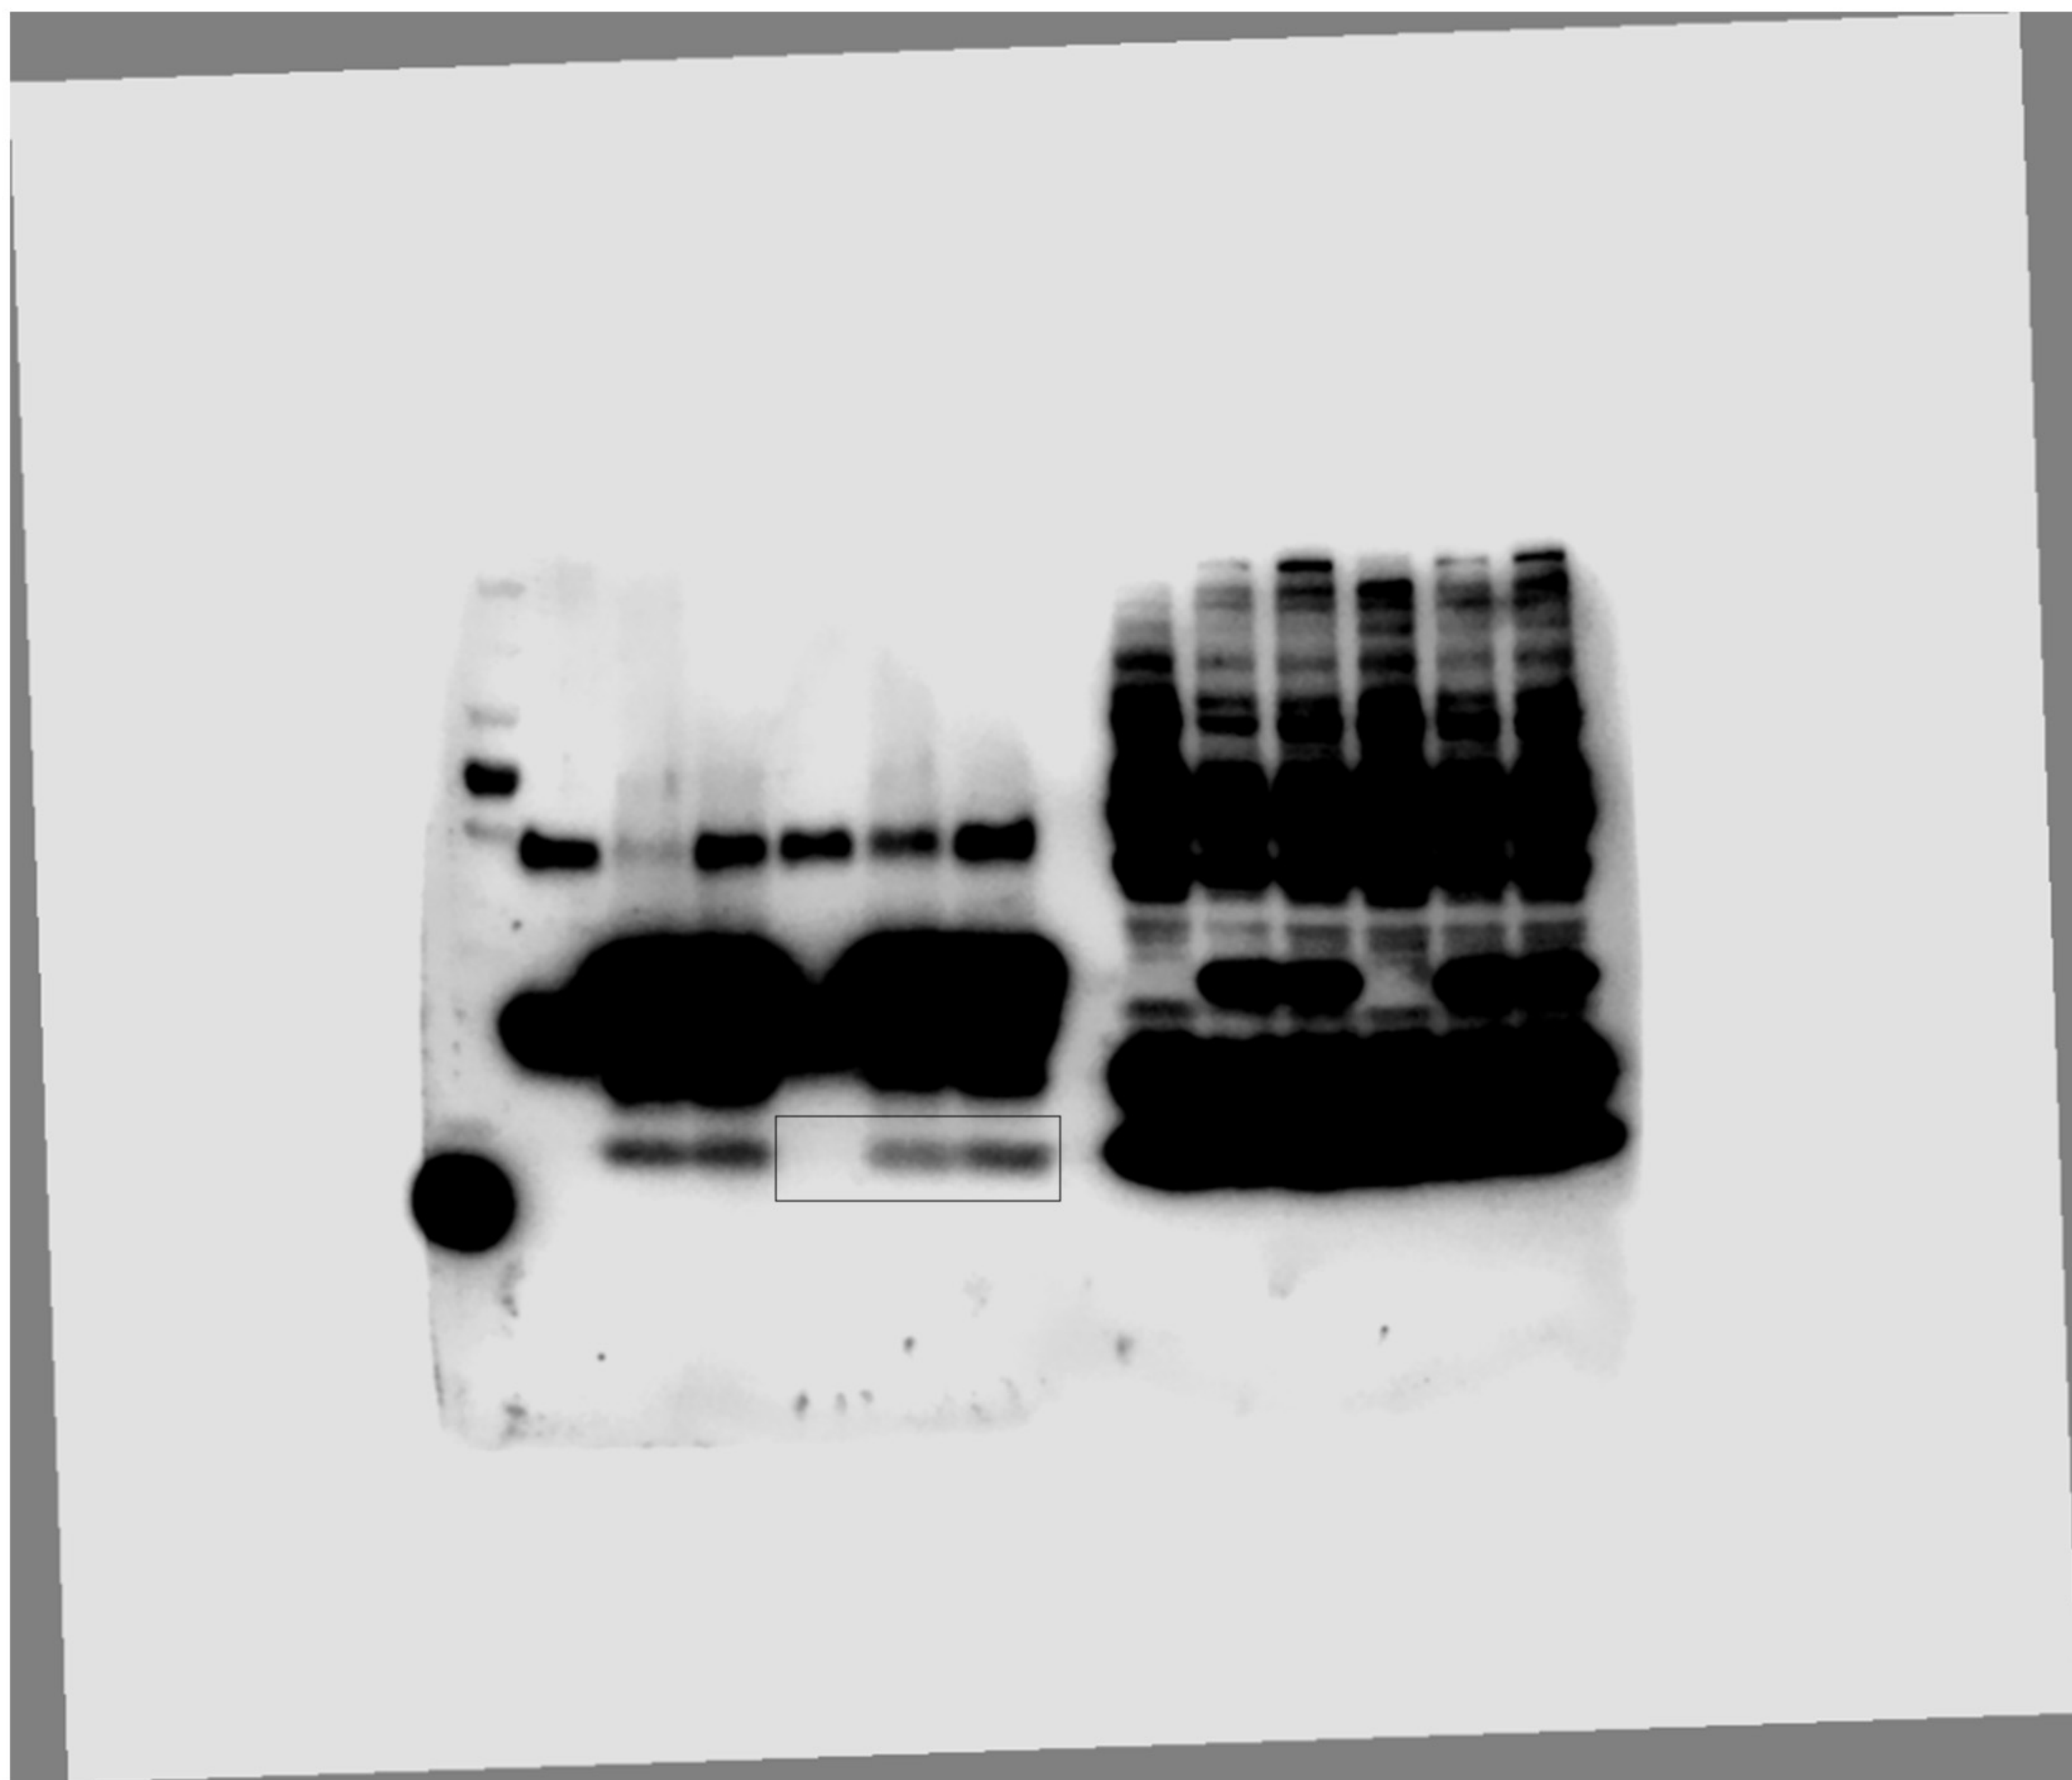

Cropped area for Figure 5B  
IP: HA, Tom20

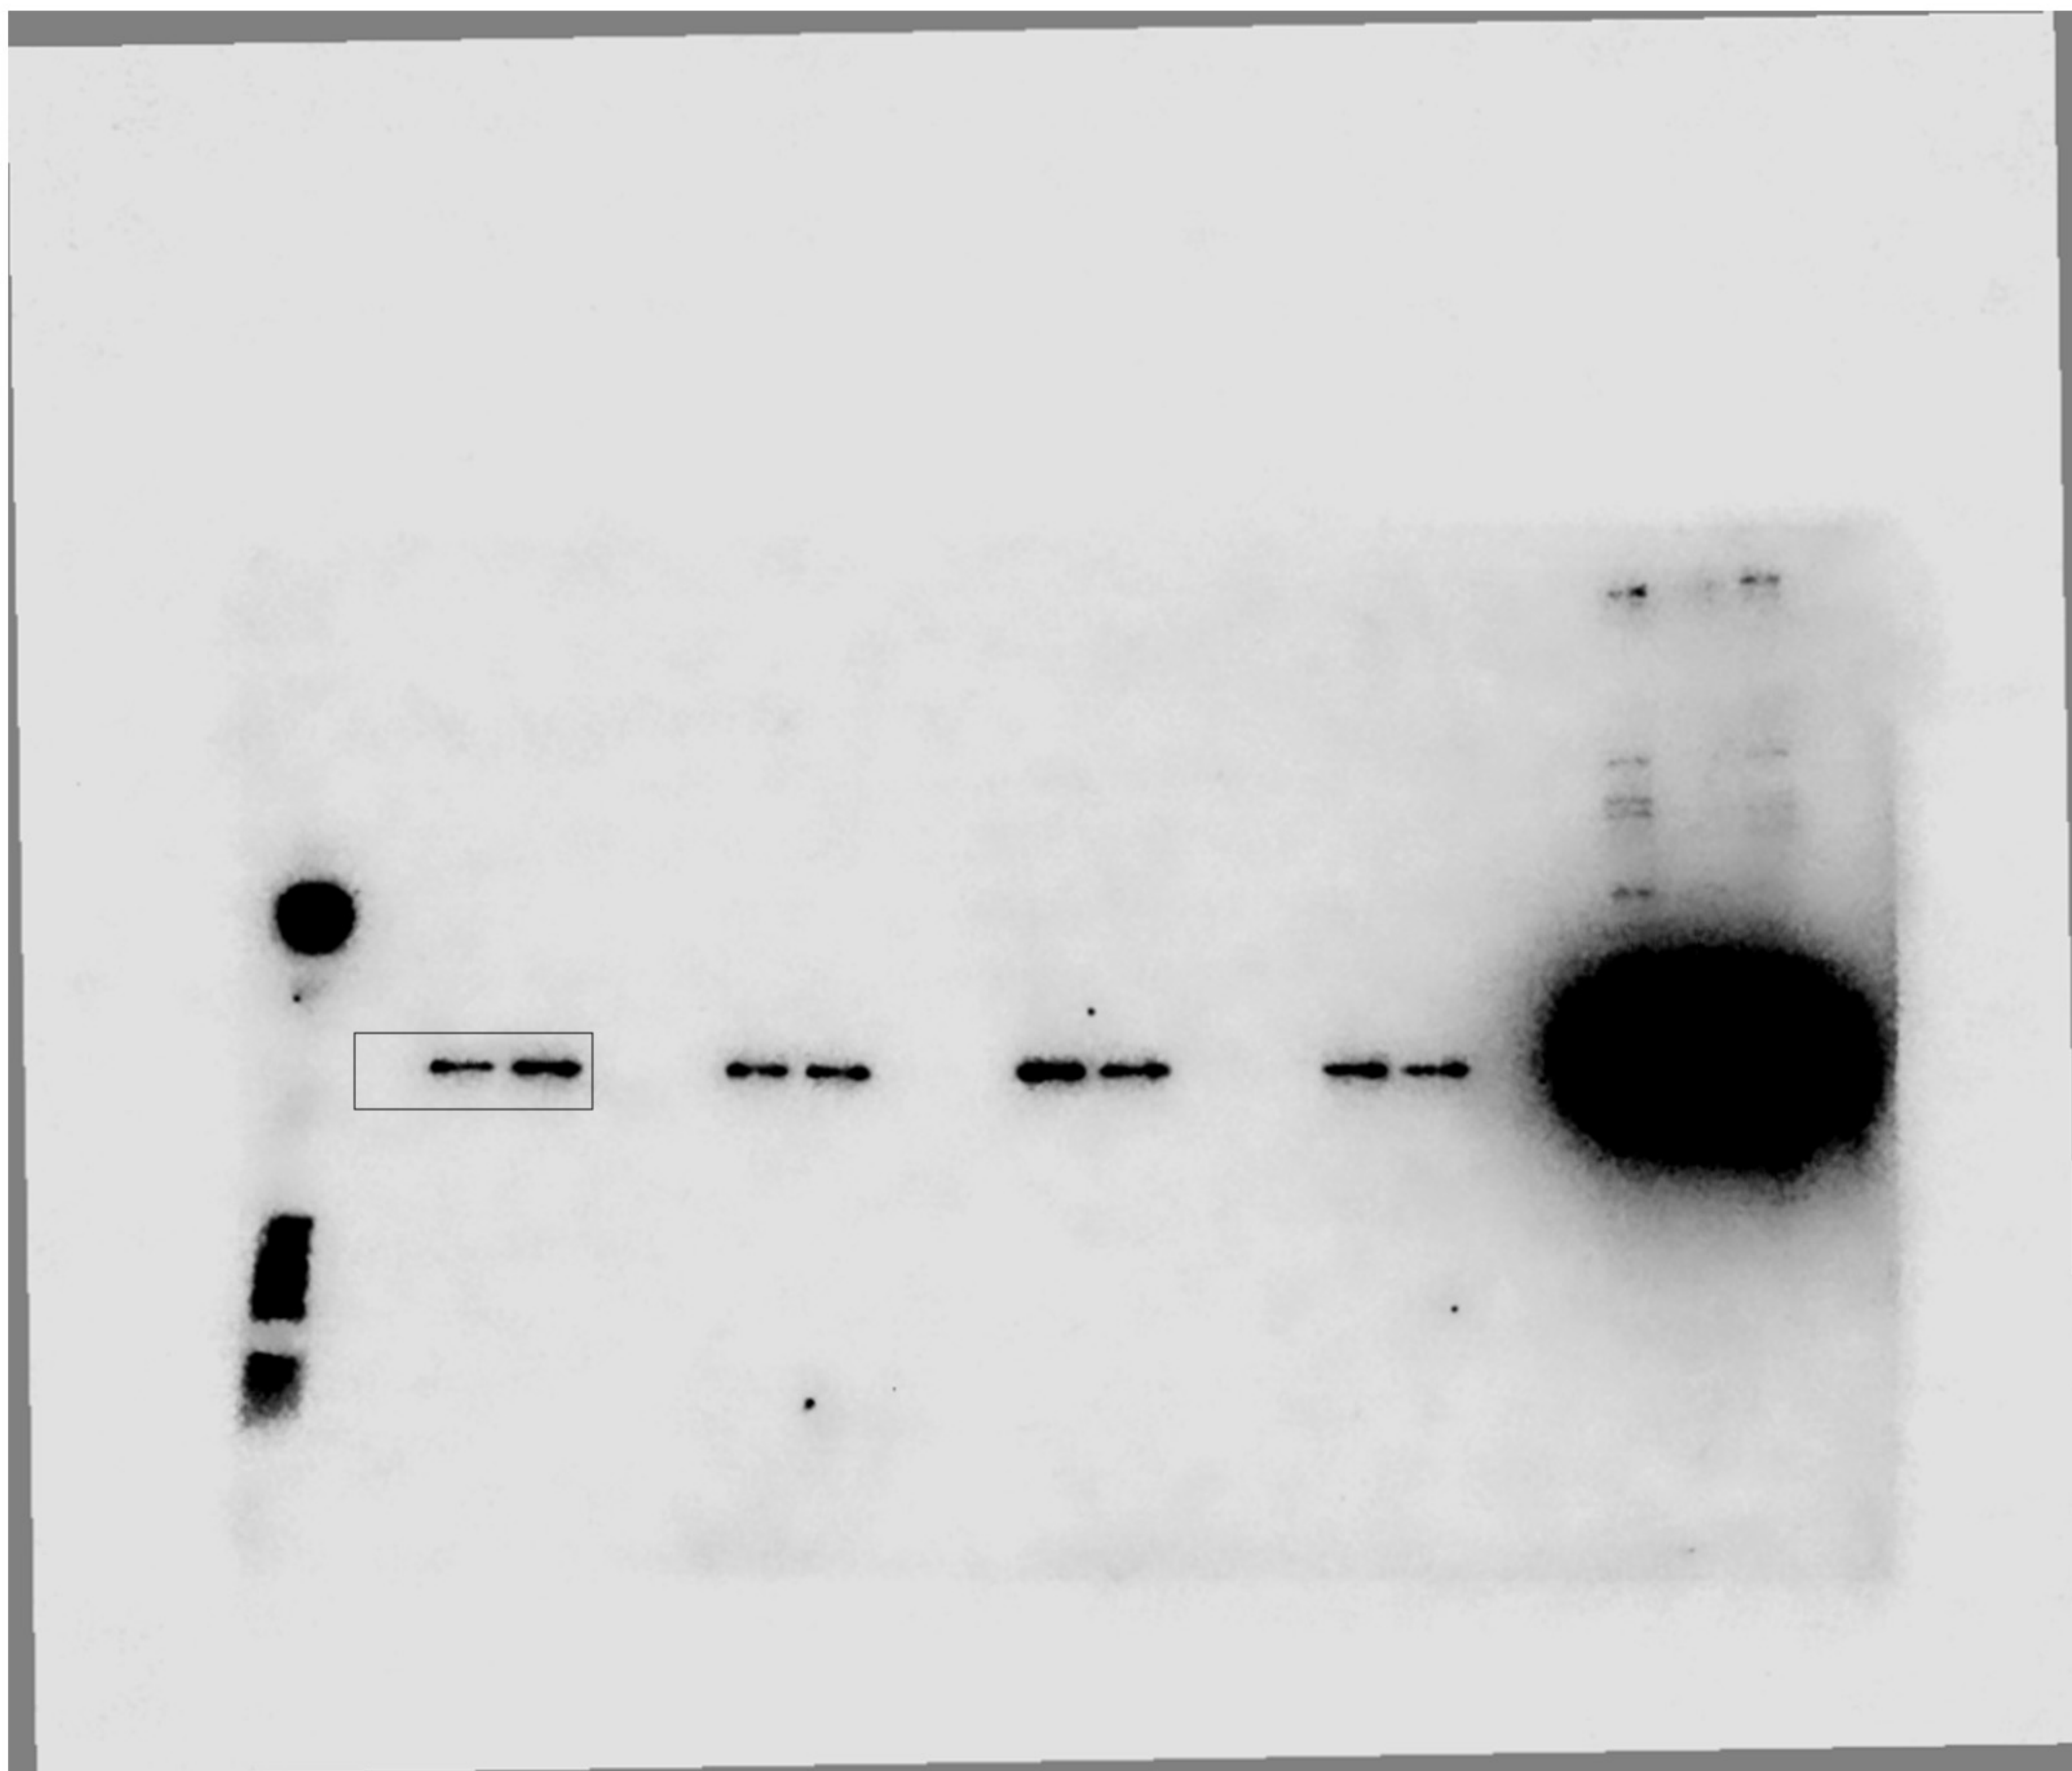

Cropped area for Figure 5B  
IP: HA, Tom40

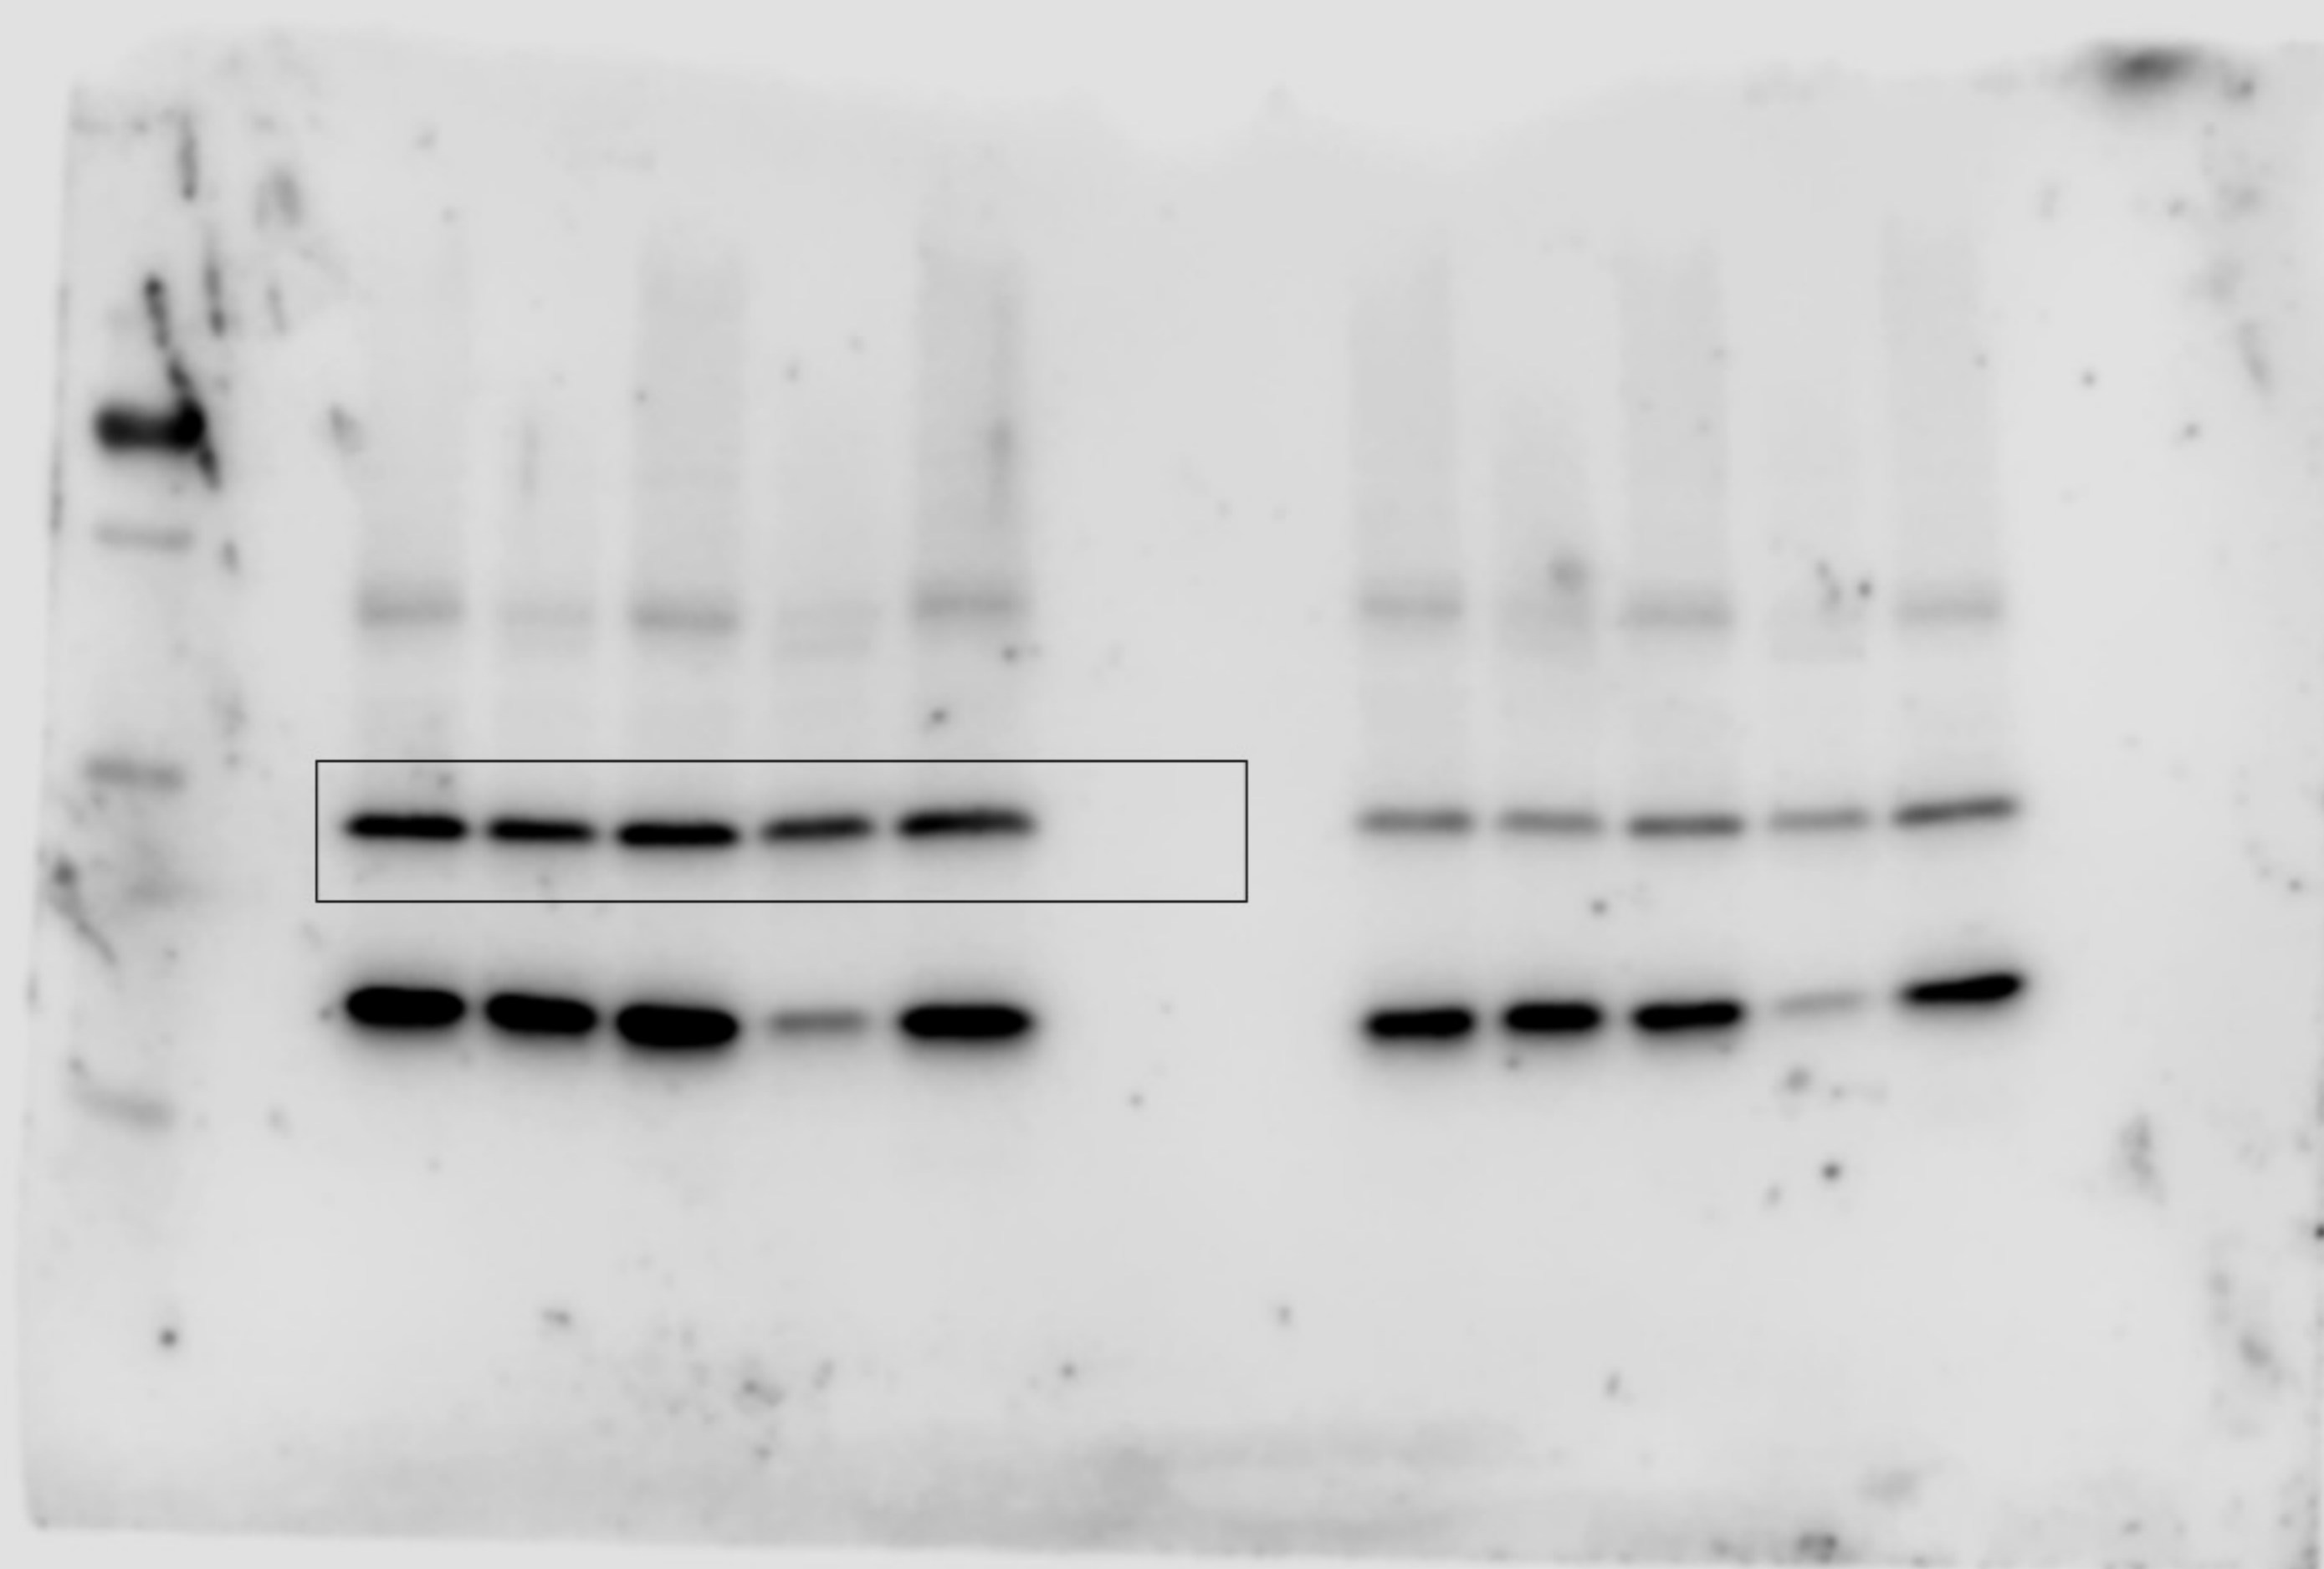

Cropped area for Figure 5D  
Ant1-HA, anti-HA

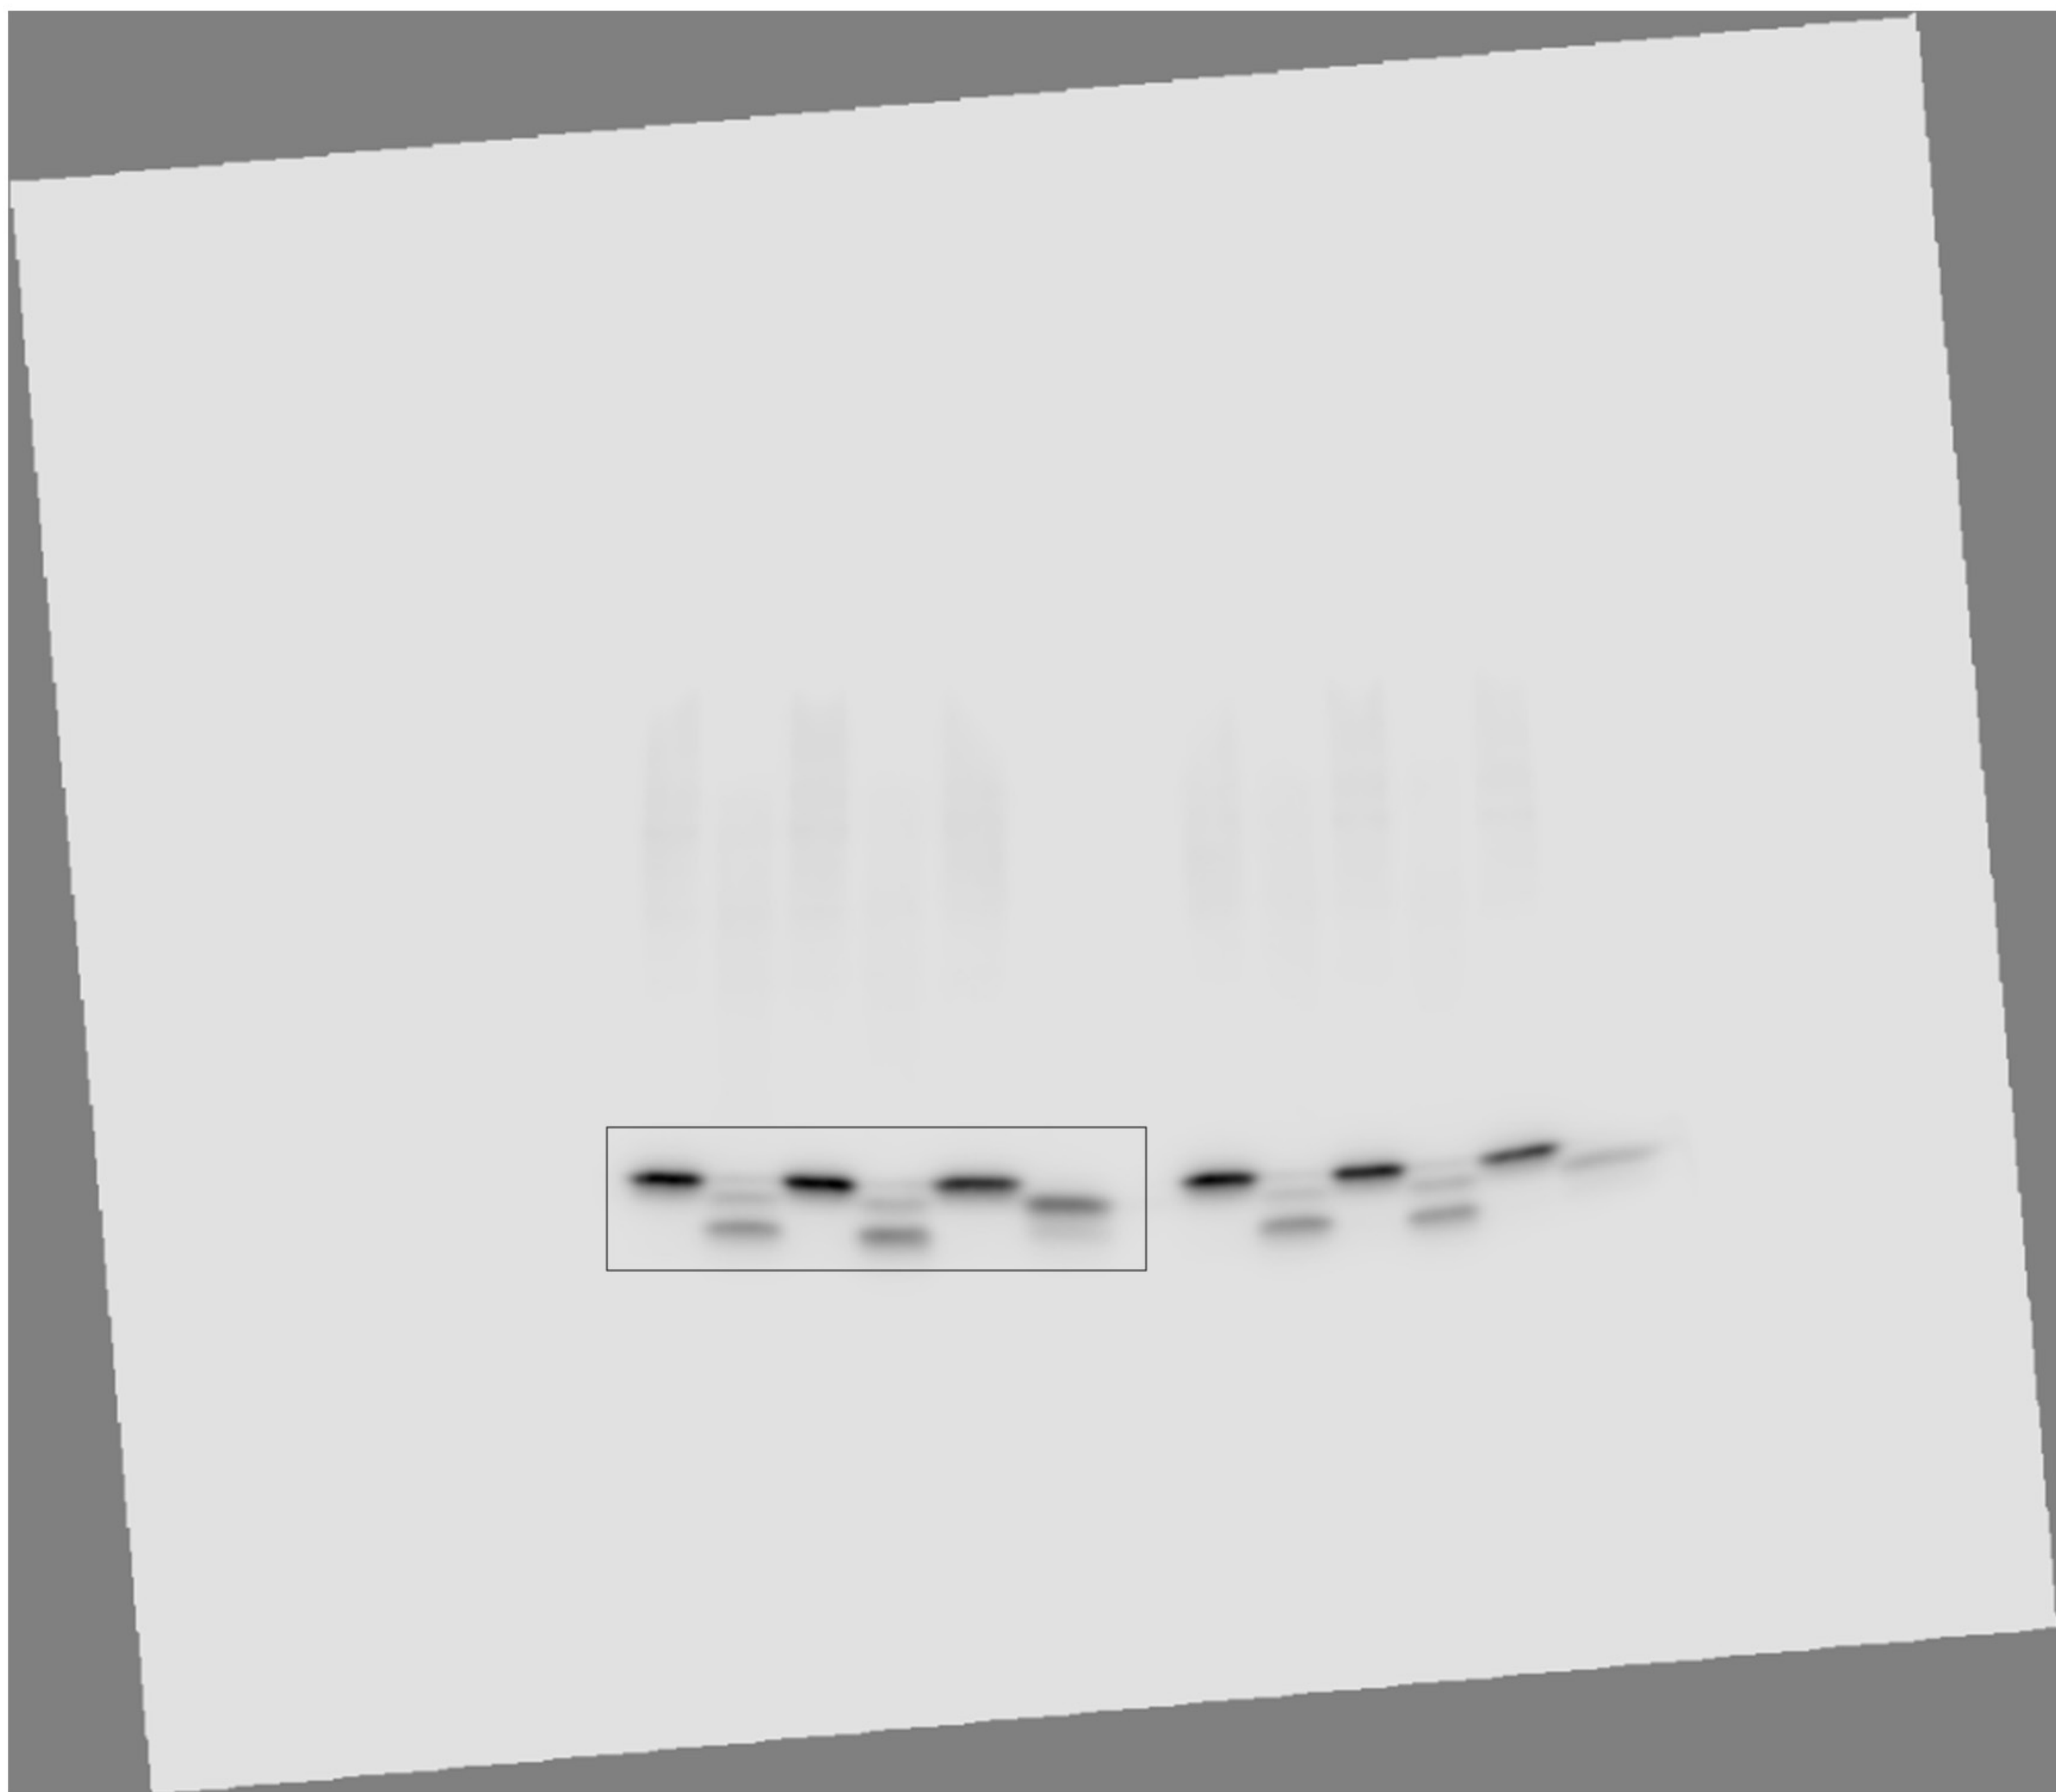

Cropped area for Figure 5D  
Ant1-HA, anti-Tom20

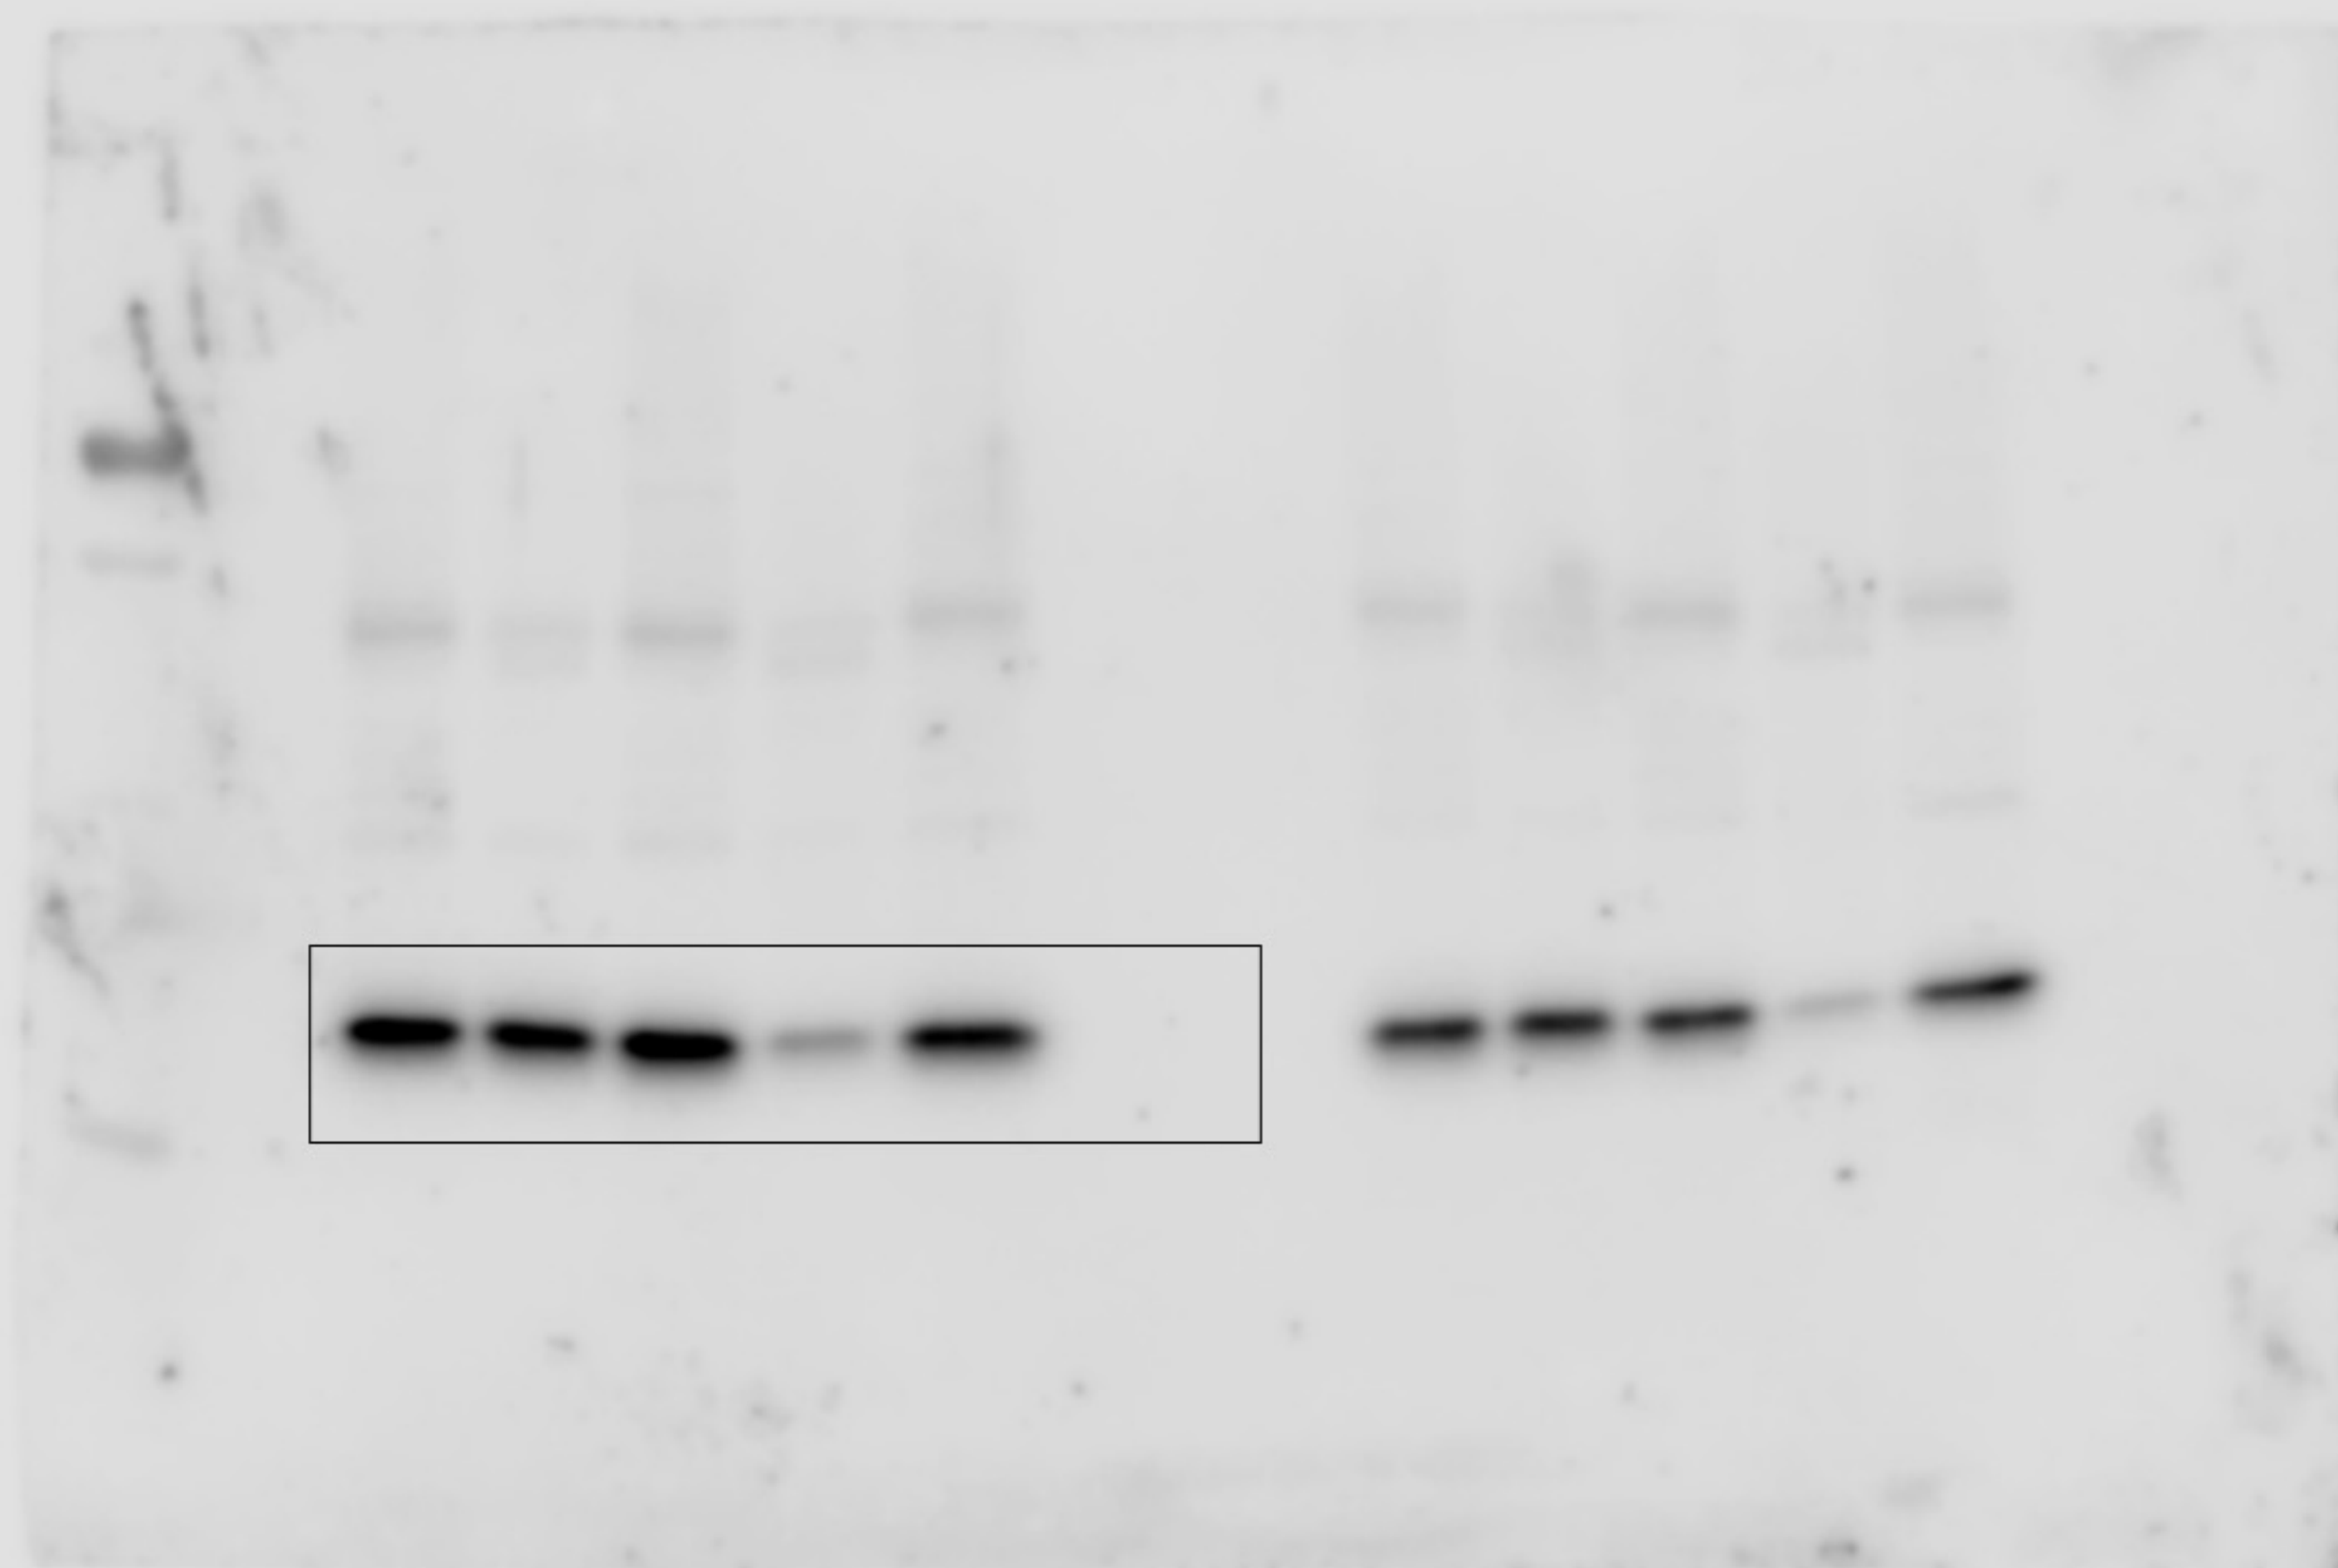

Cropped area for Figure 5D  
Ant1-HA, anti-Smac

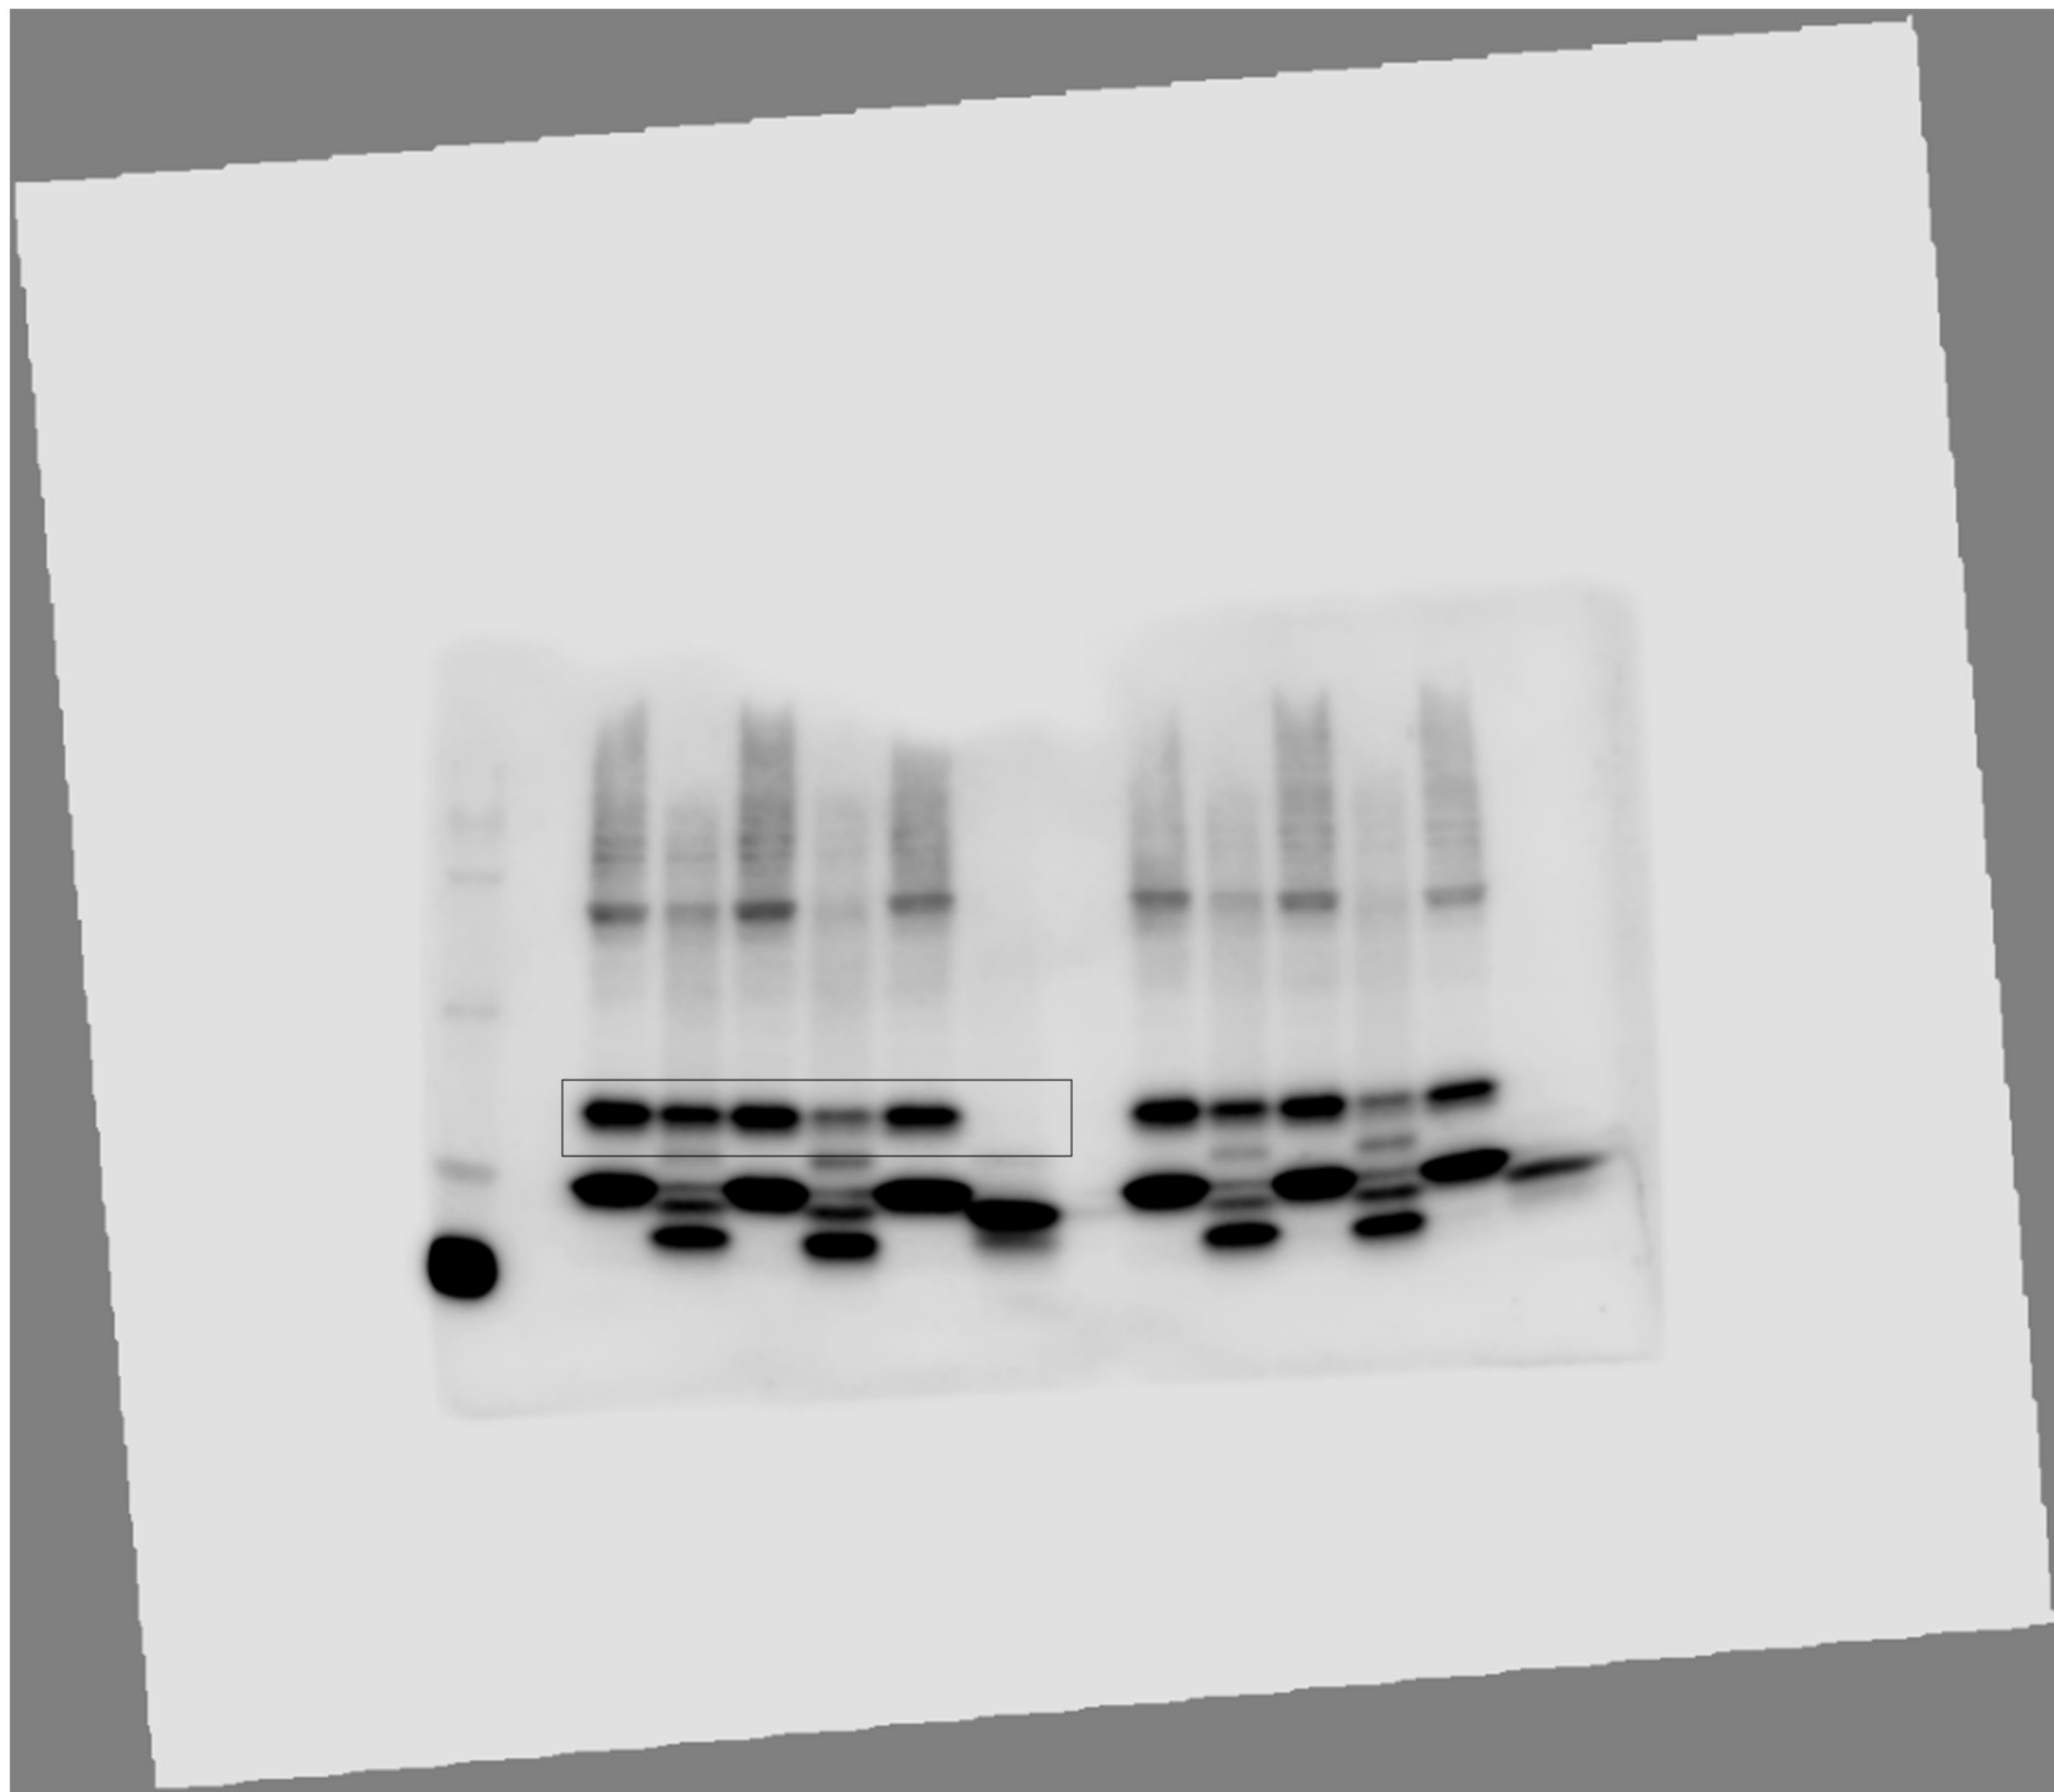

Cropped area for Figure 5D  
Ant1-HA, anti-Tim22



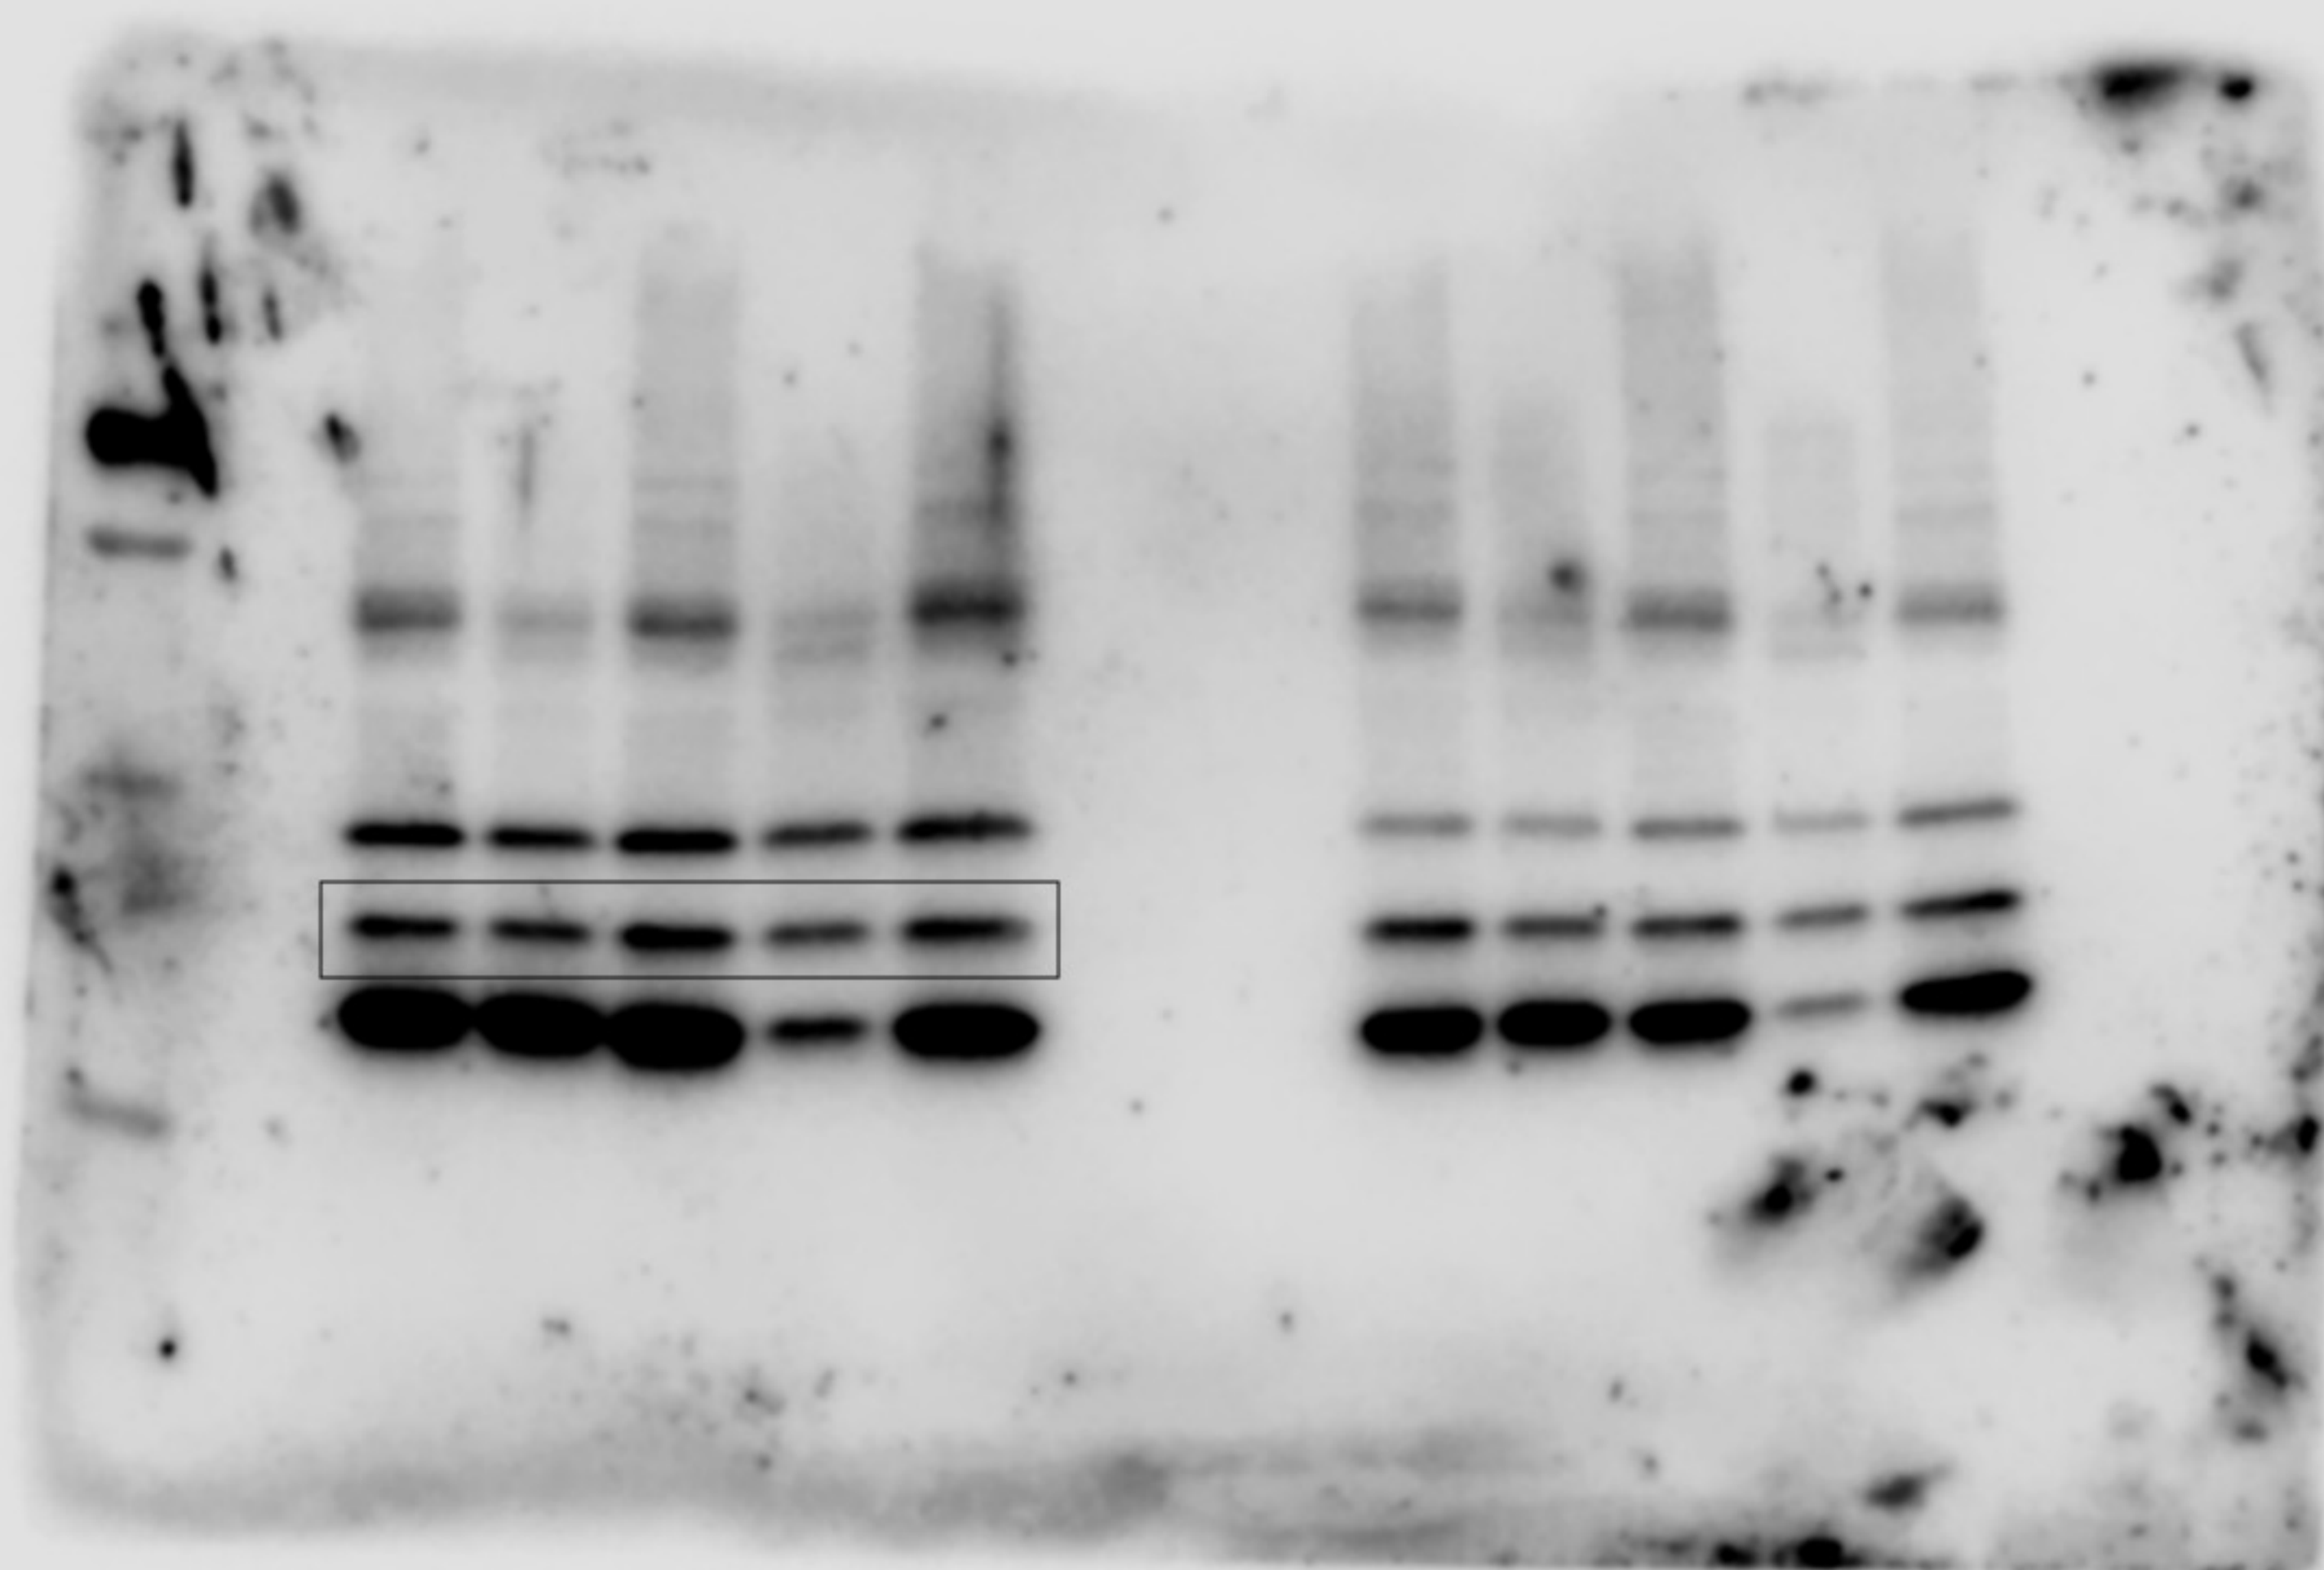

Cropped area for Figure 5D  
Ant1-HA, anti-TFAM



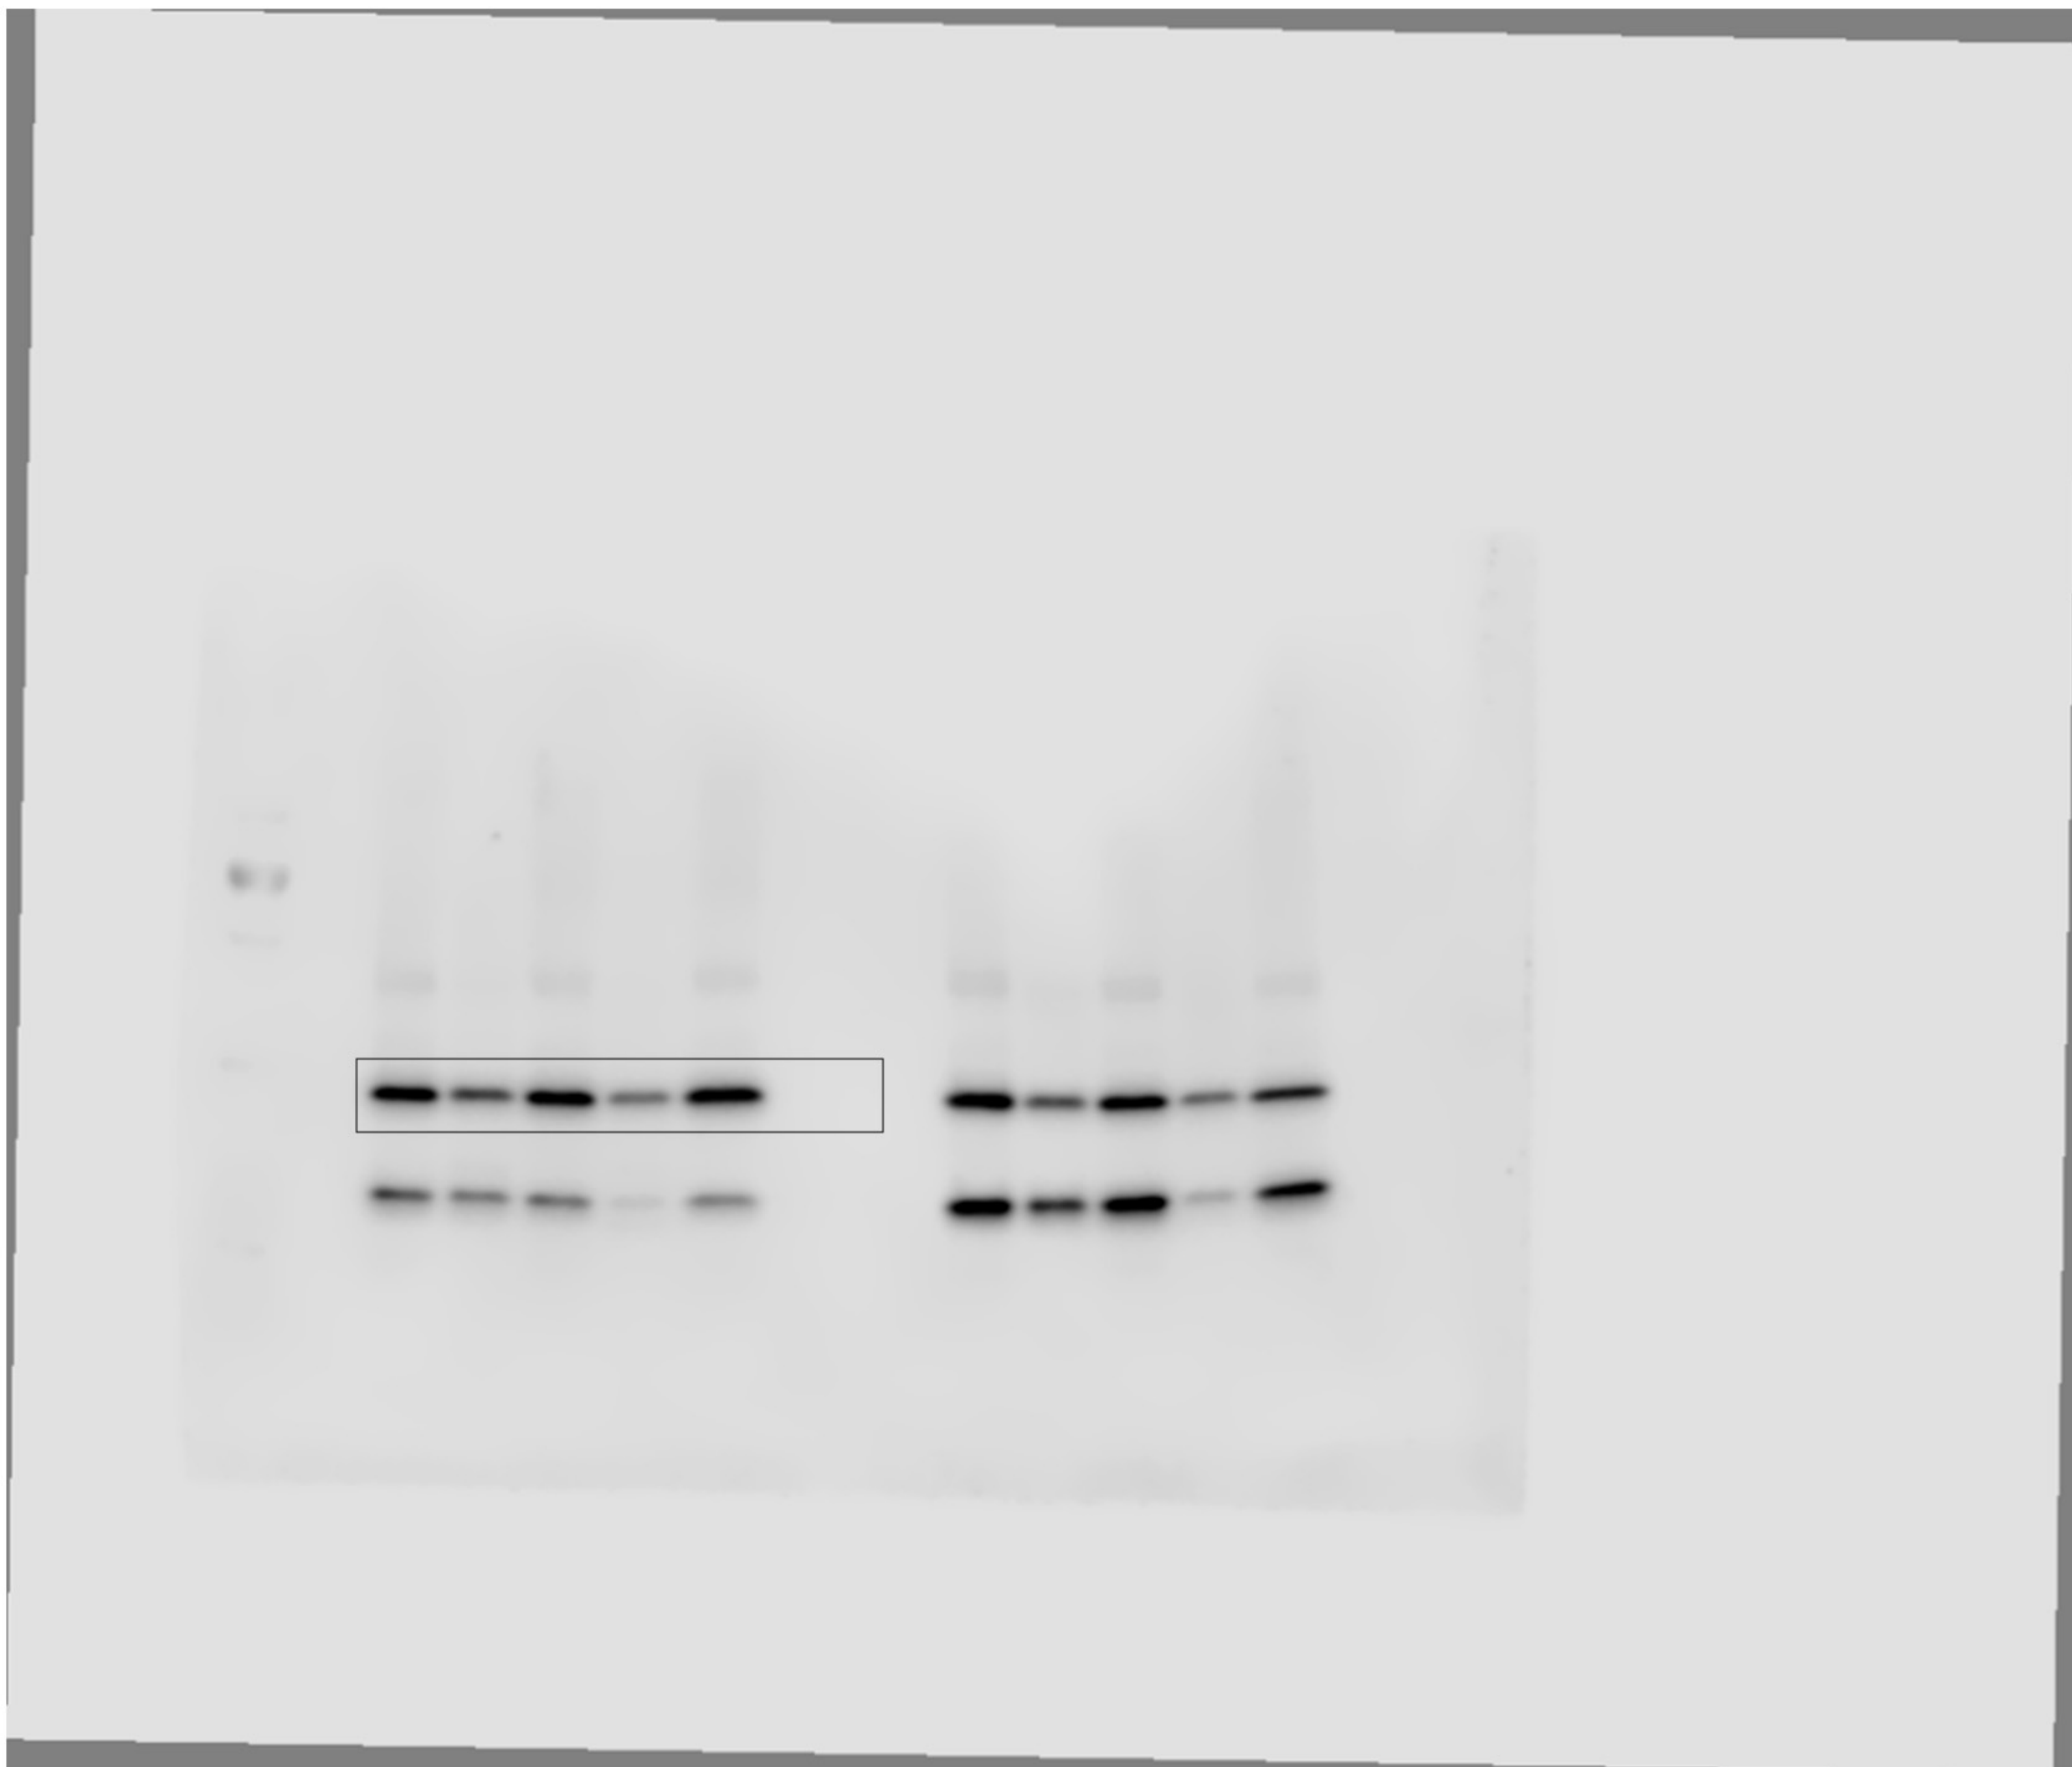

Croppped area for Figure 5D  
Ant1(A114P)-HA, anti-HA

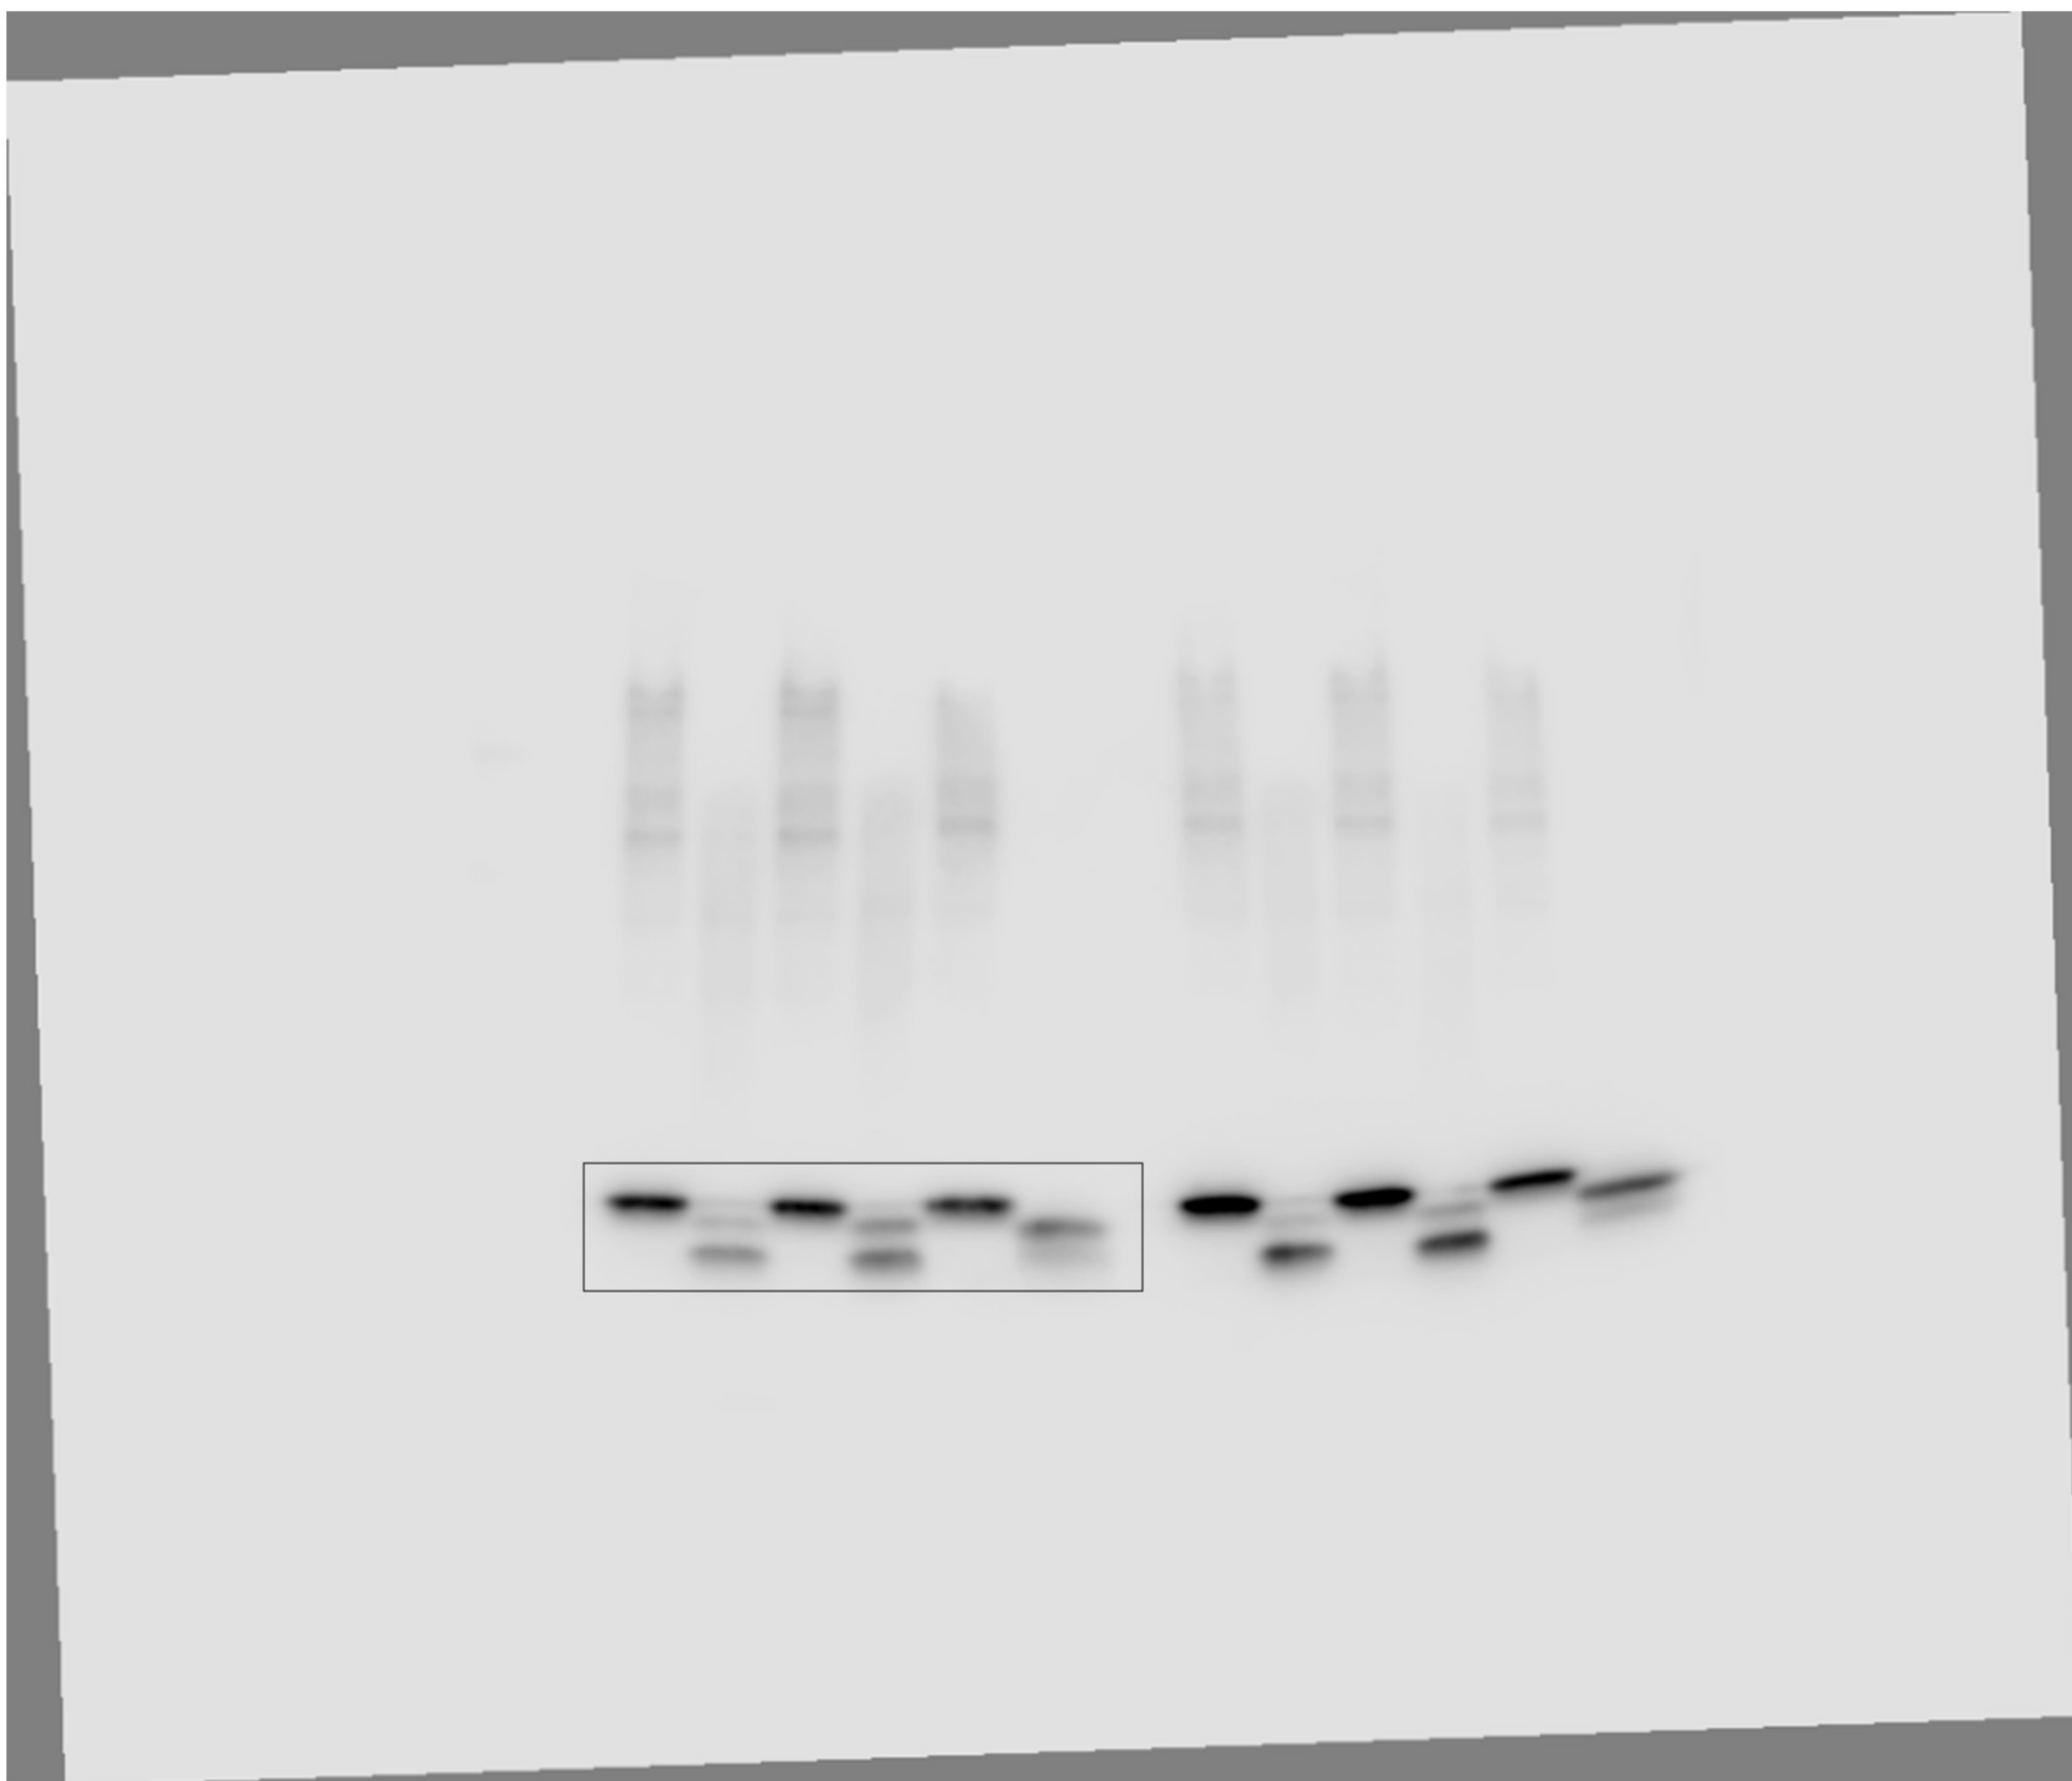

Cropped area for Figure 5D  
Ant1(A114P)-HA, anti-Tom20

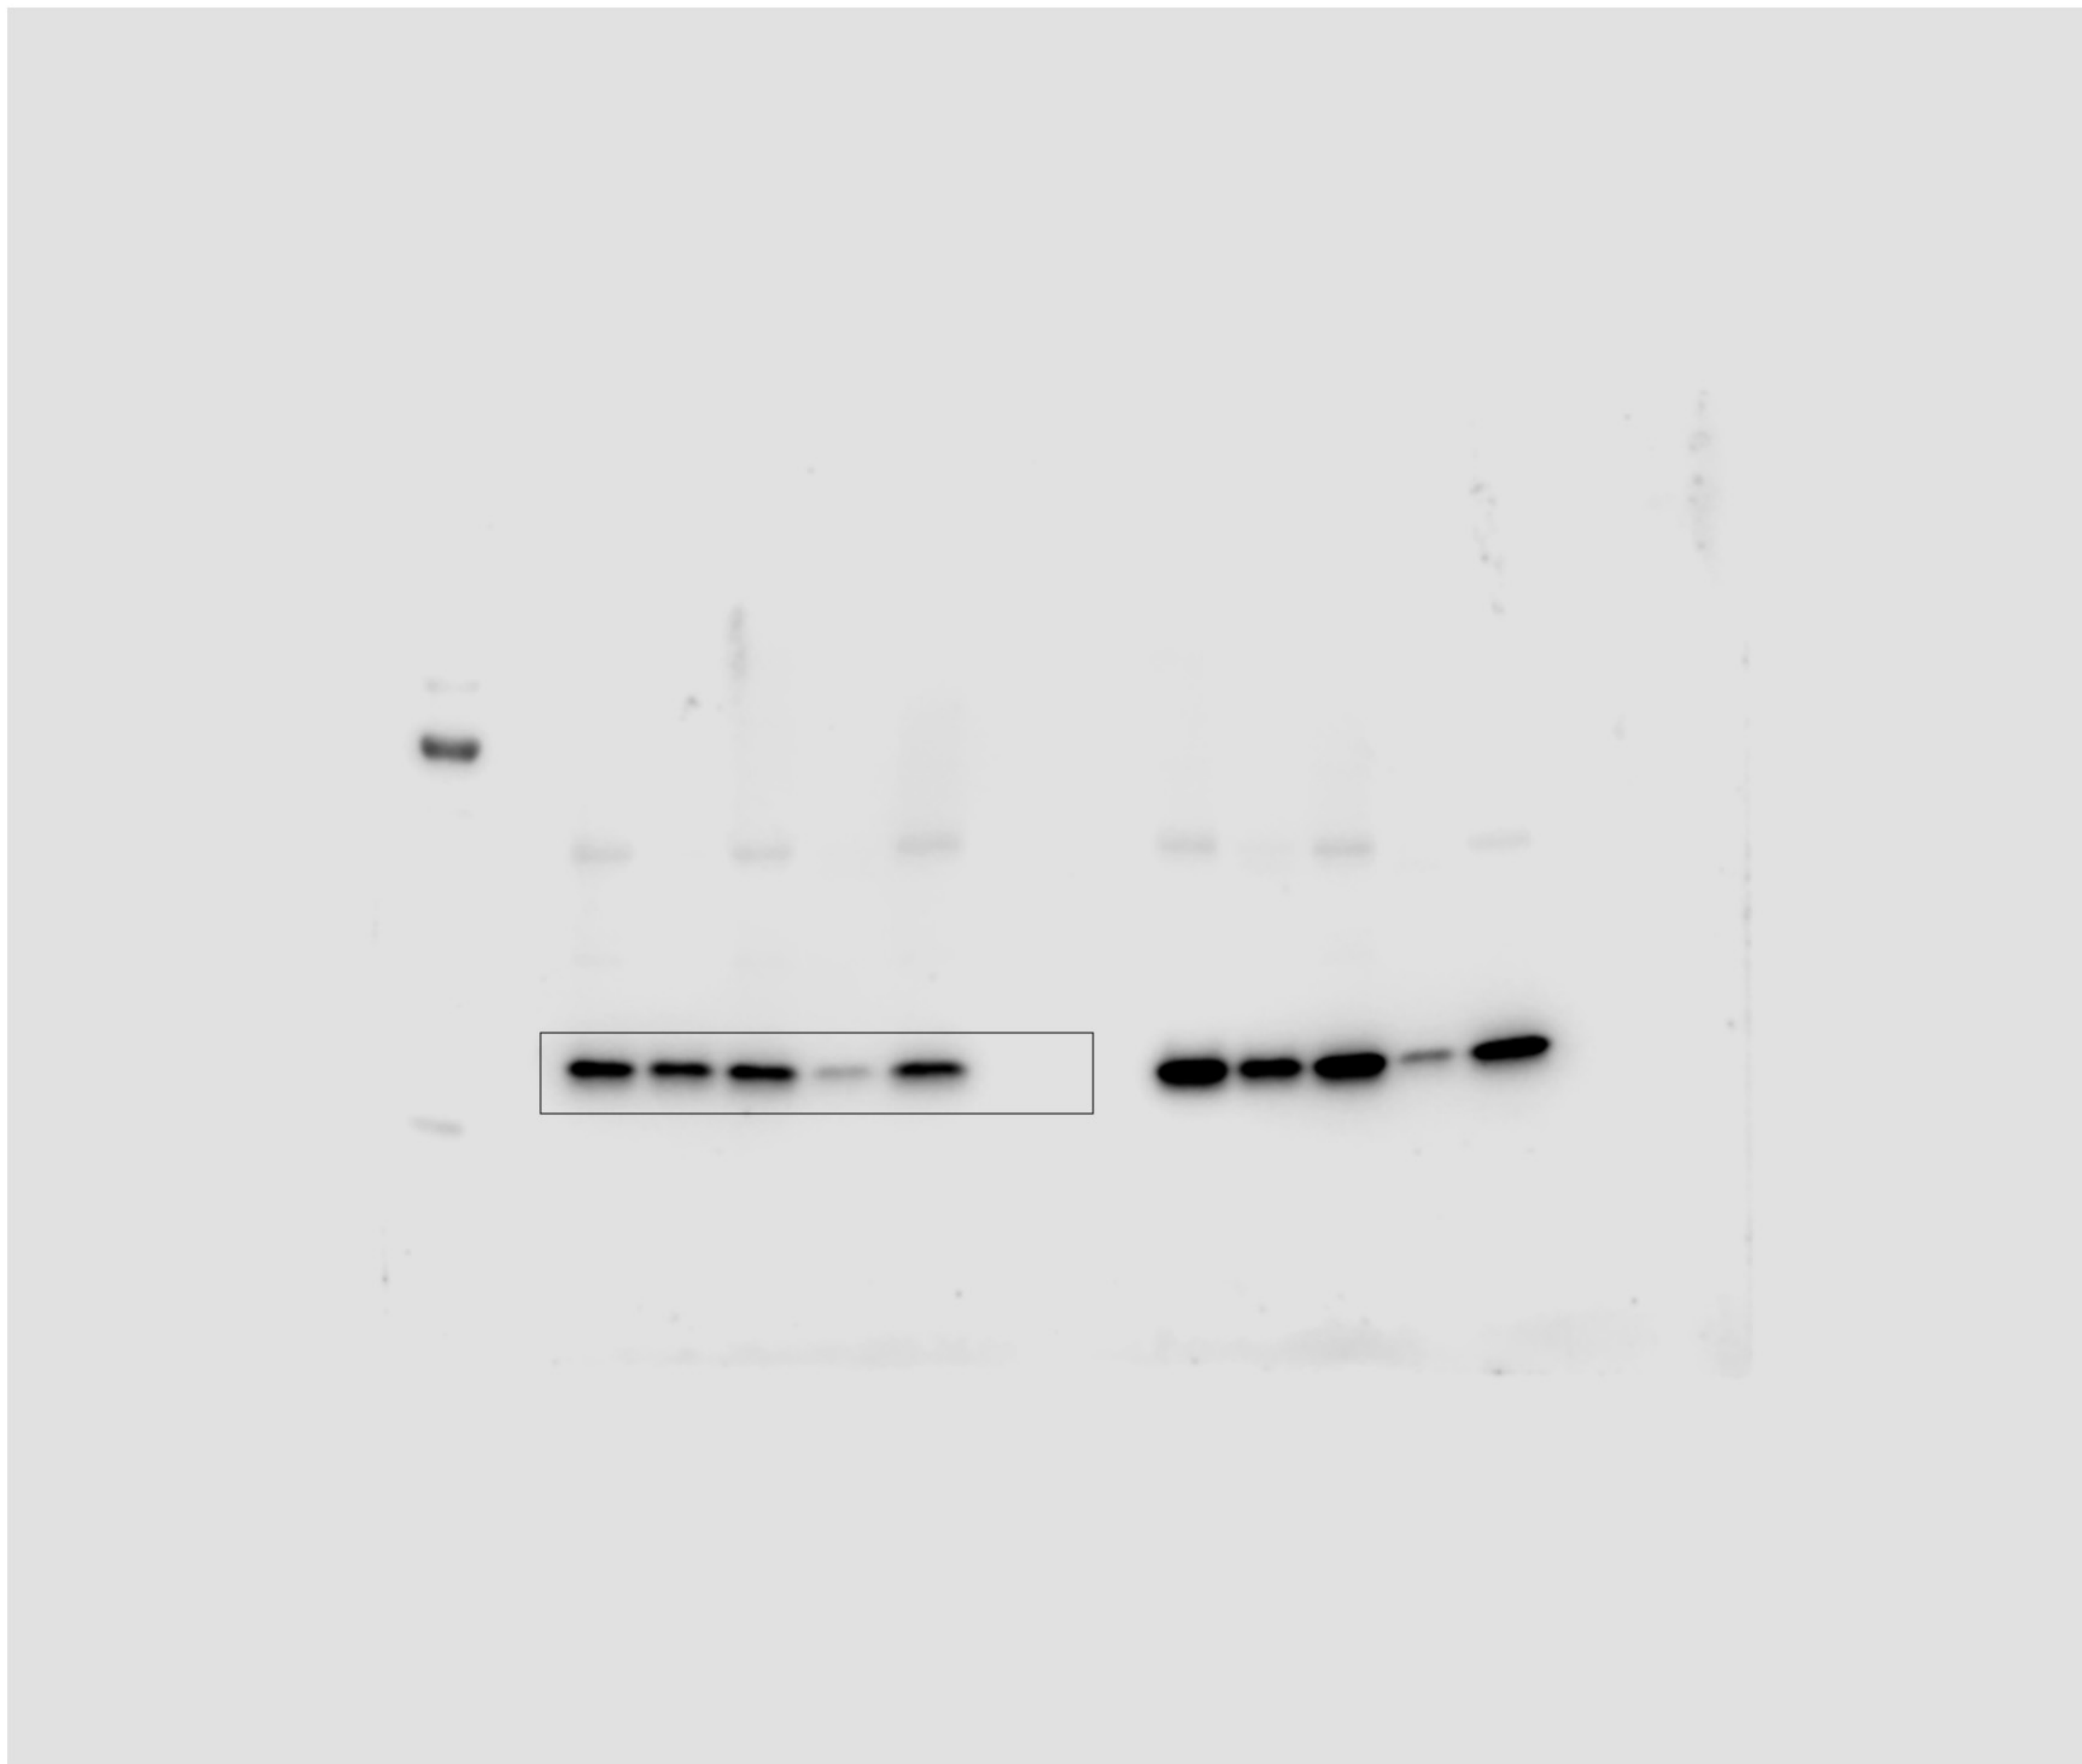

Cropped area for Figure 5D  
Ant1(A114P)-HA, anti-Smac

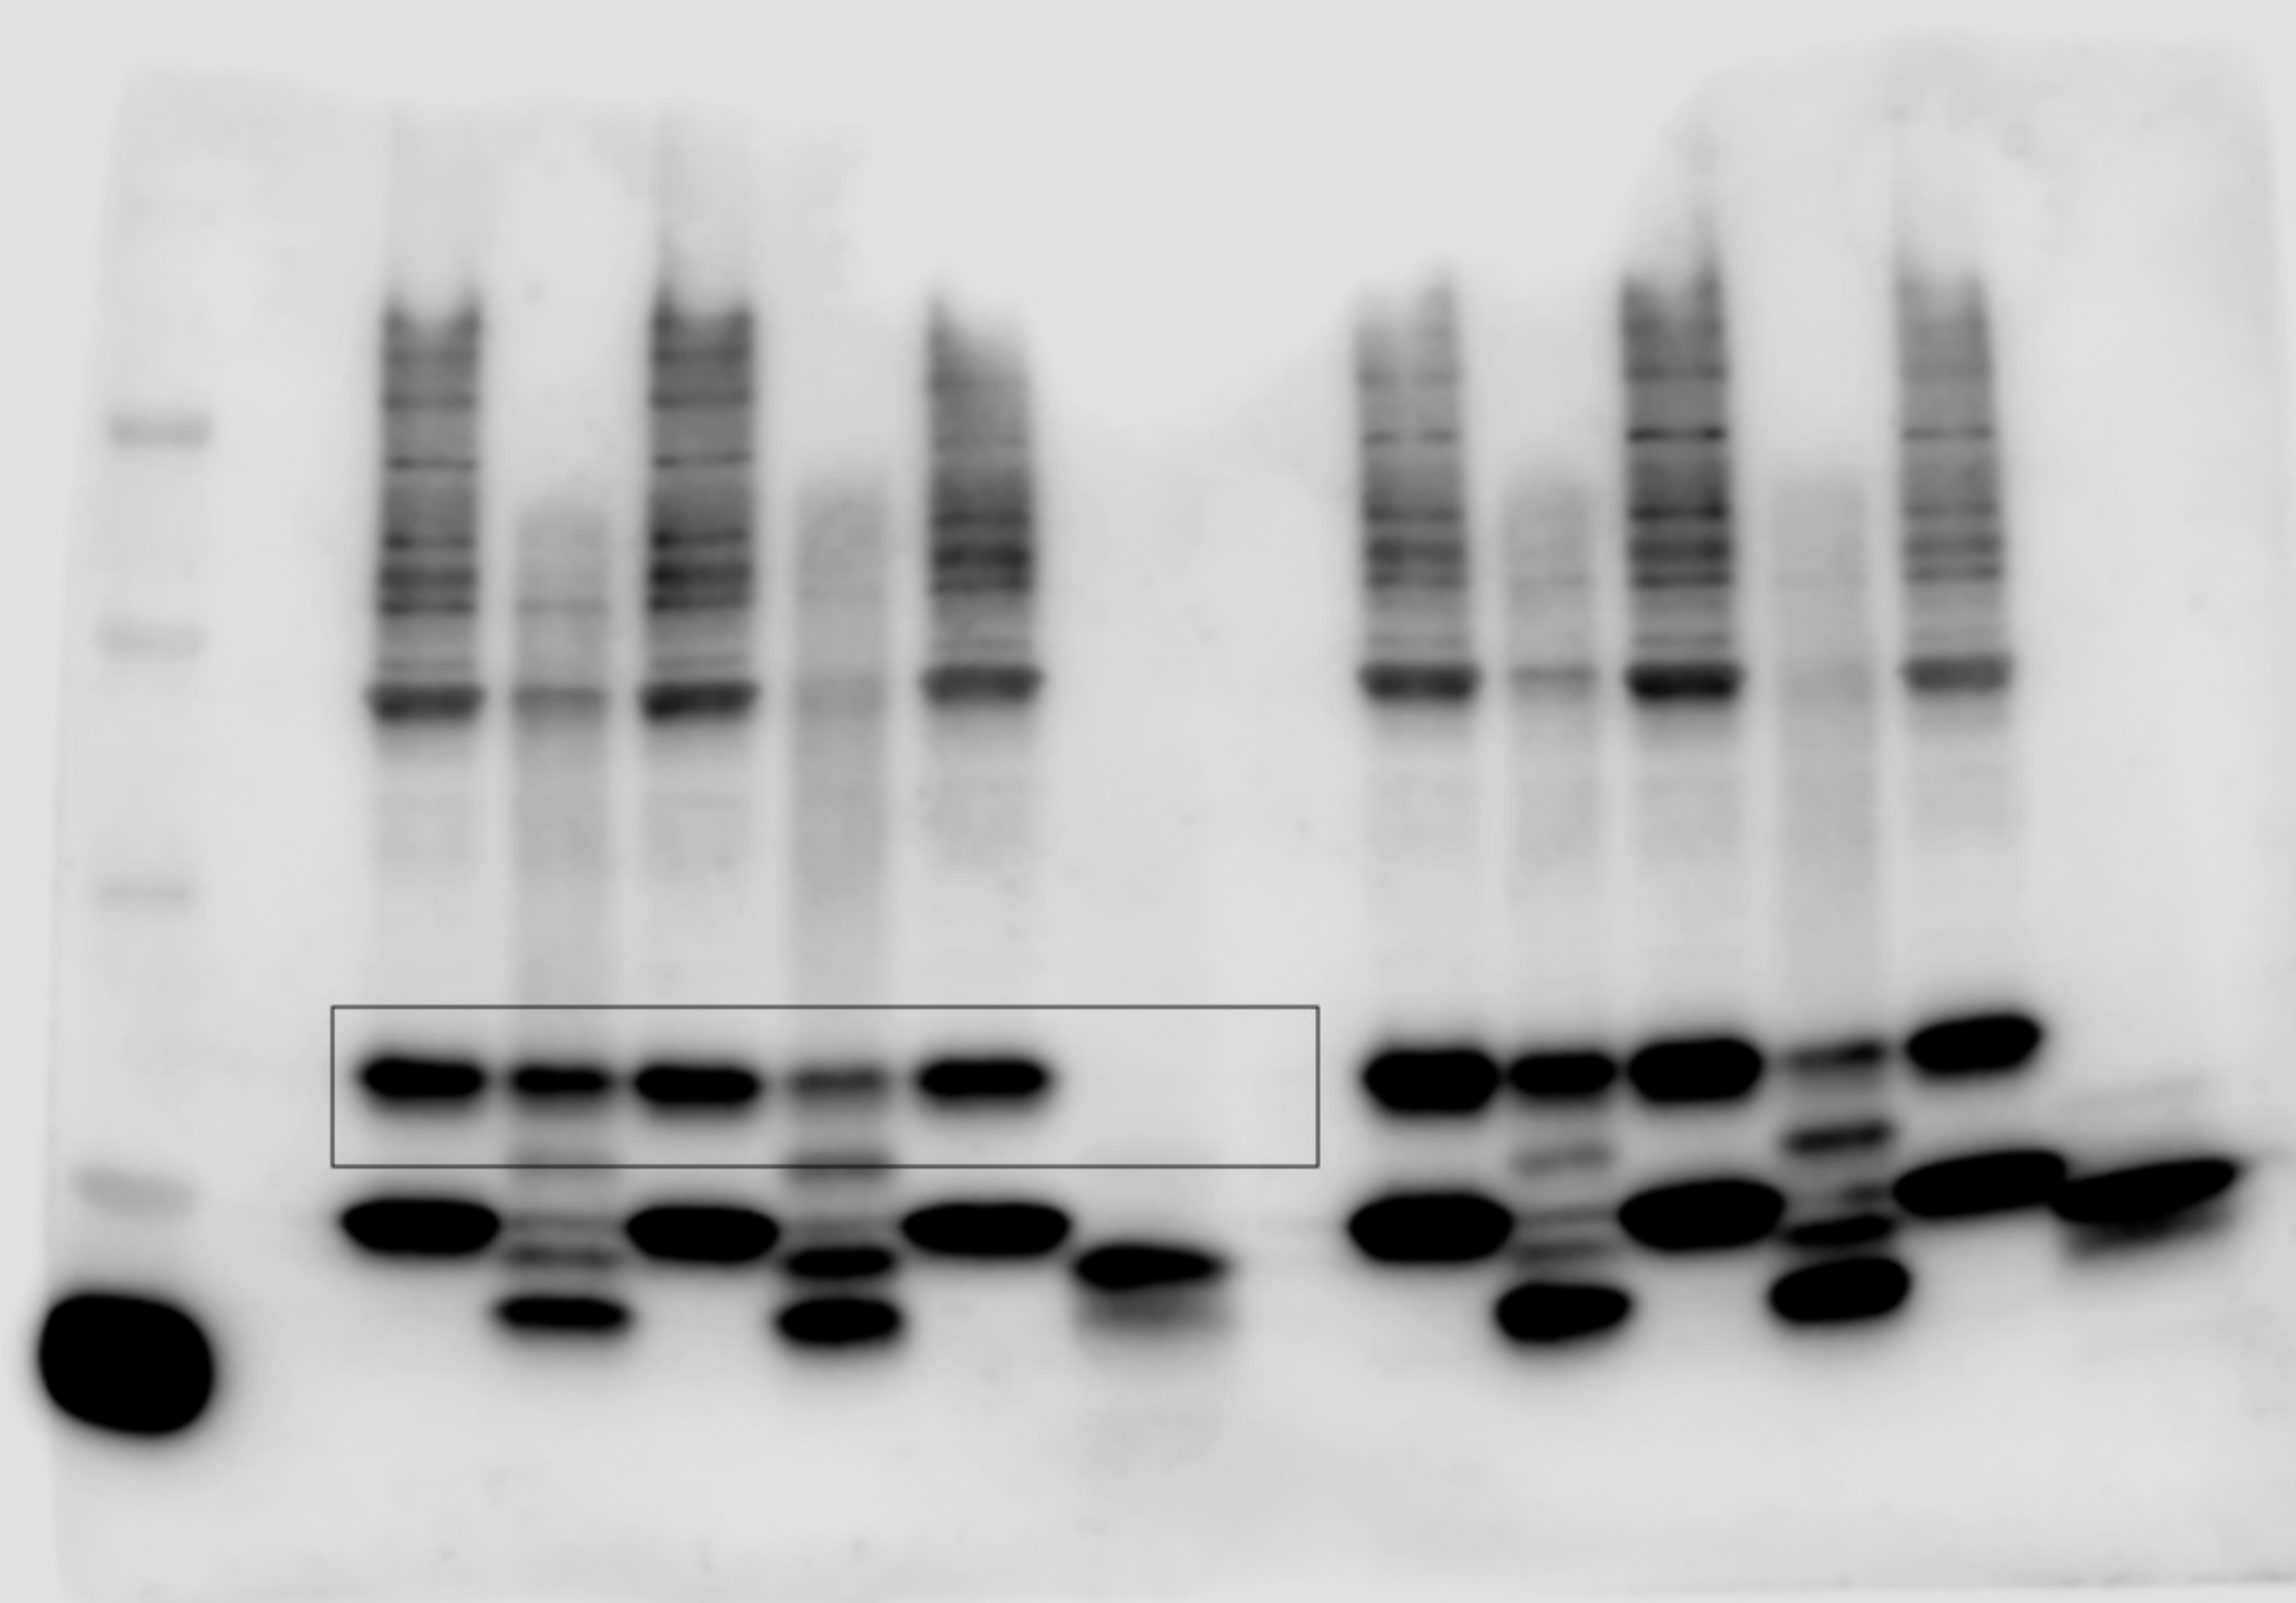

Cropped area for Figure 5D  
Ant1(A114P)-HA, anti-Tim22

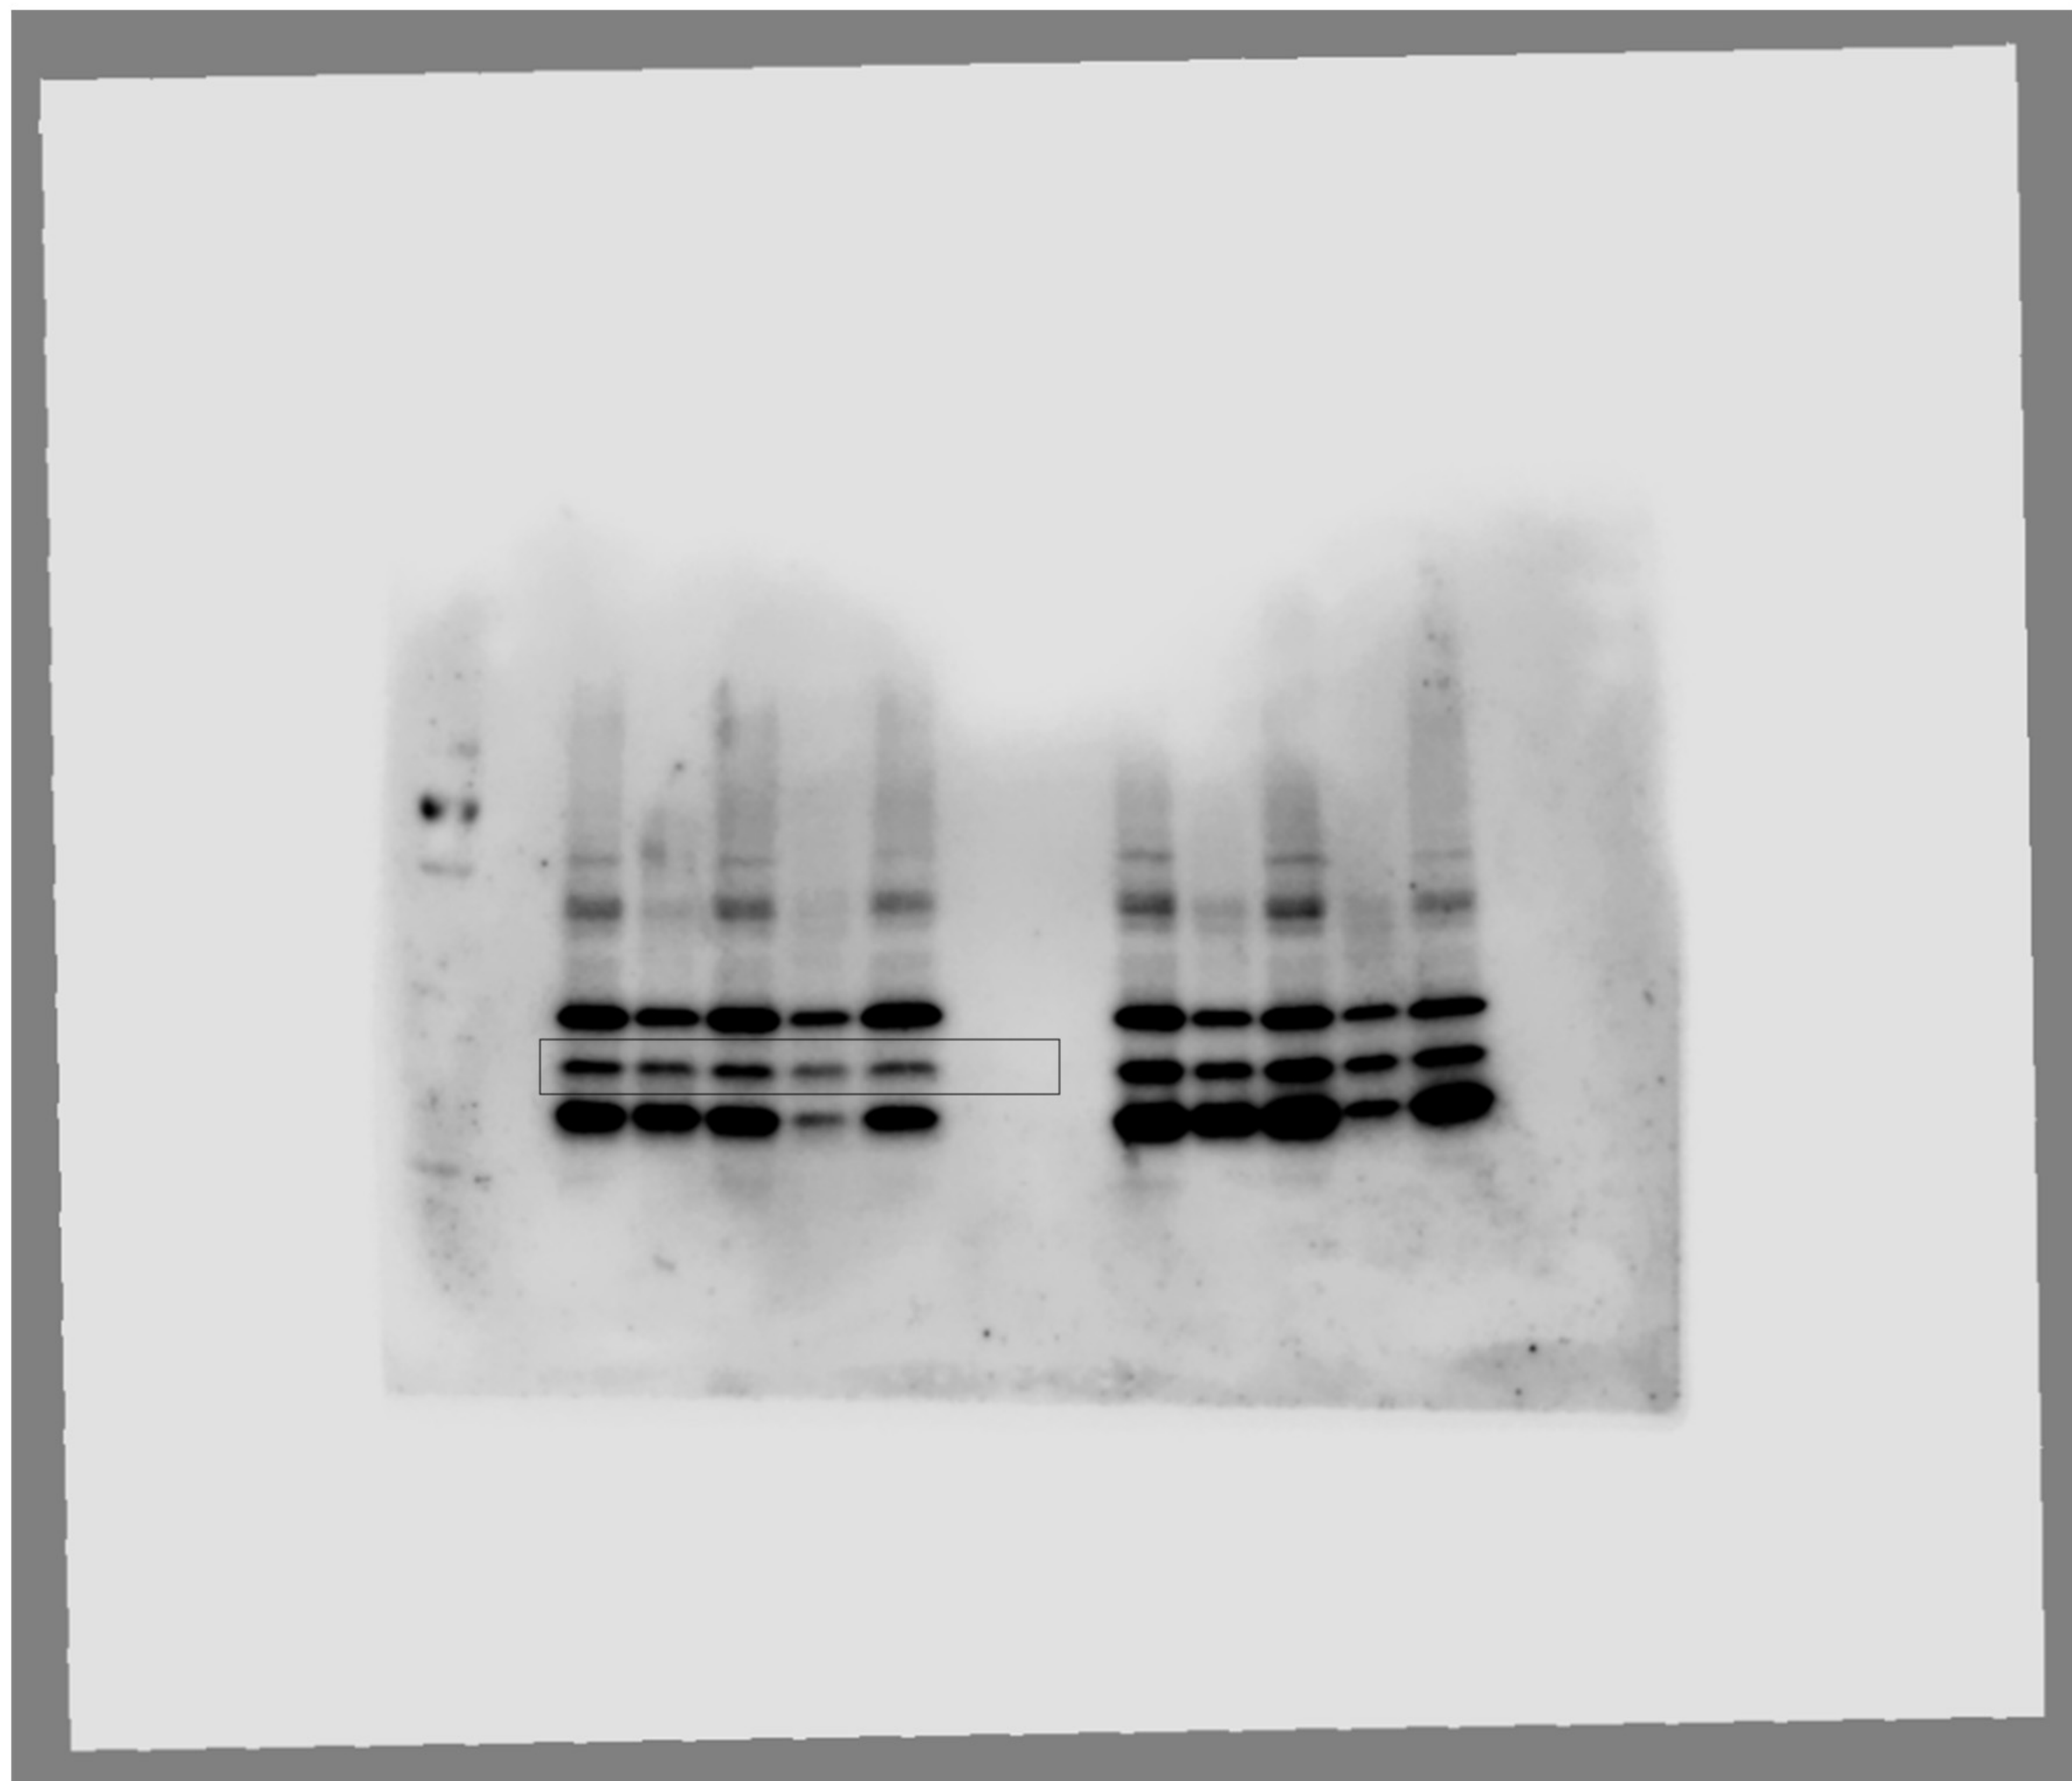

Cropped area for Figure 5D  
Ant1(A114P)-HA, anti-TFAM

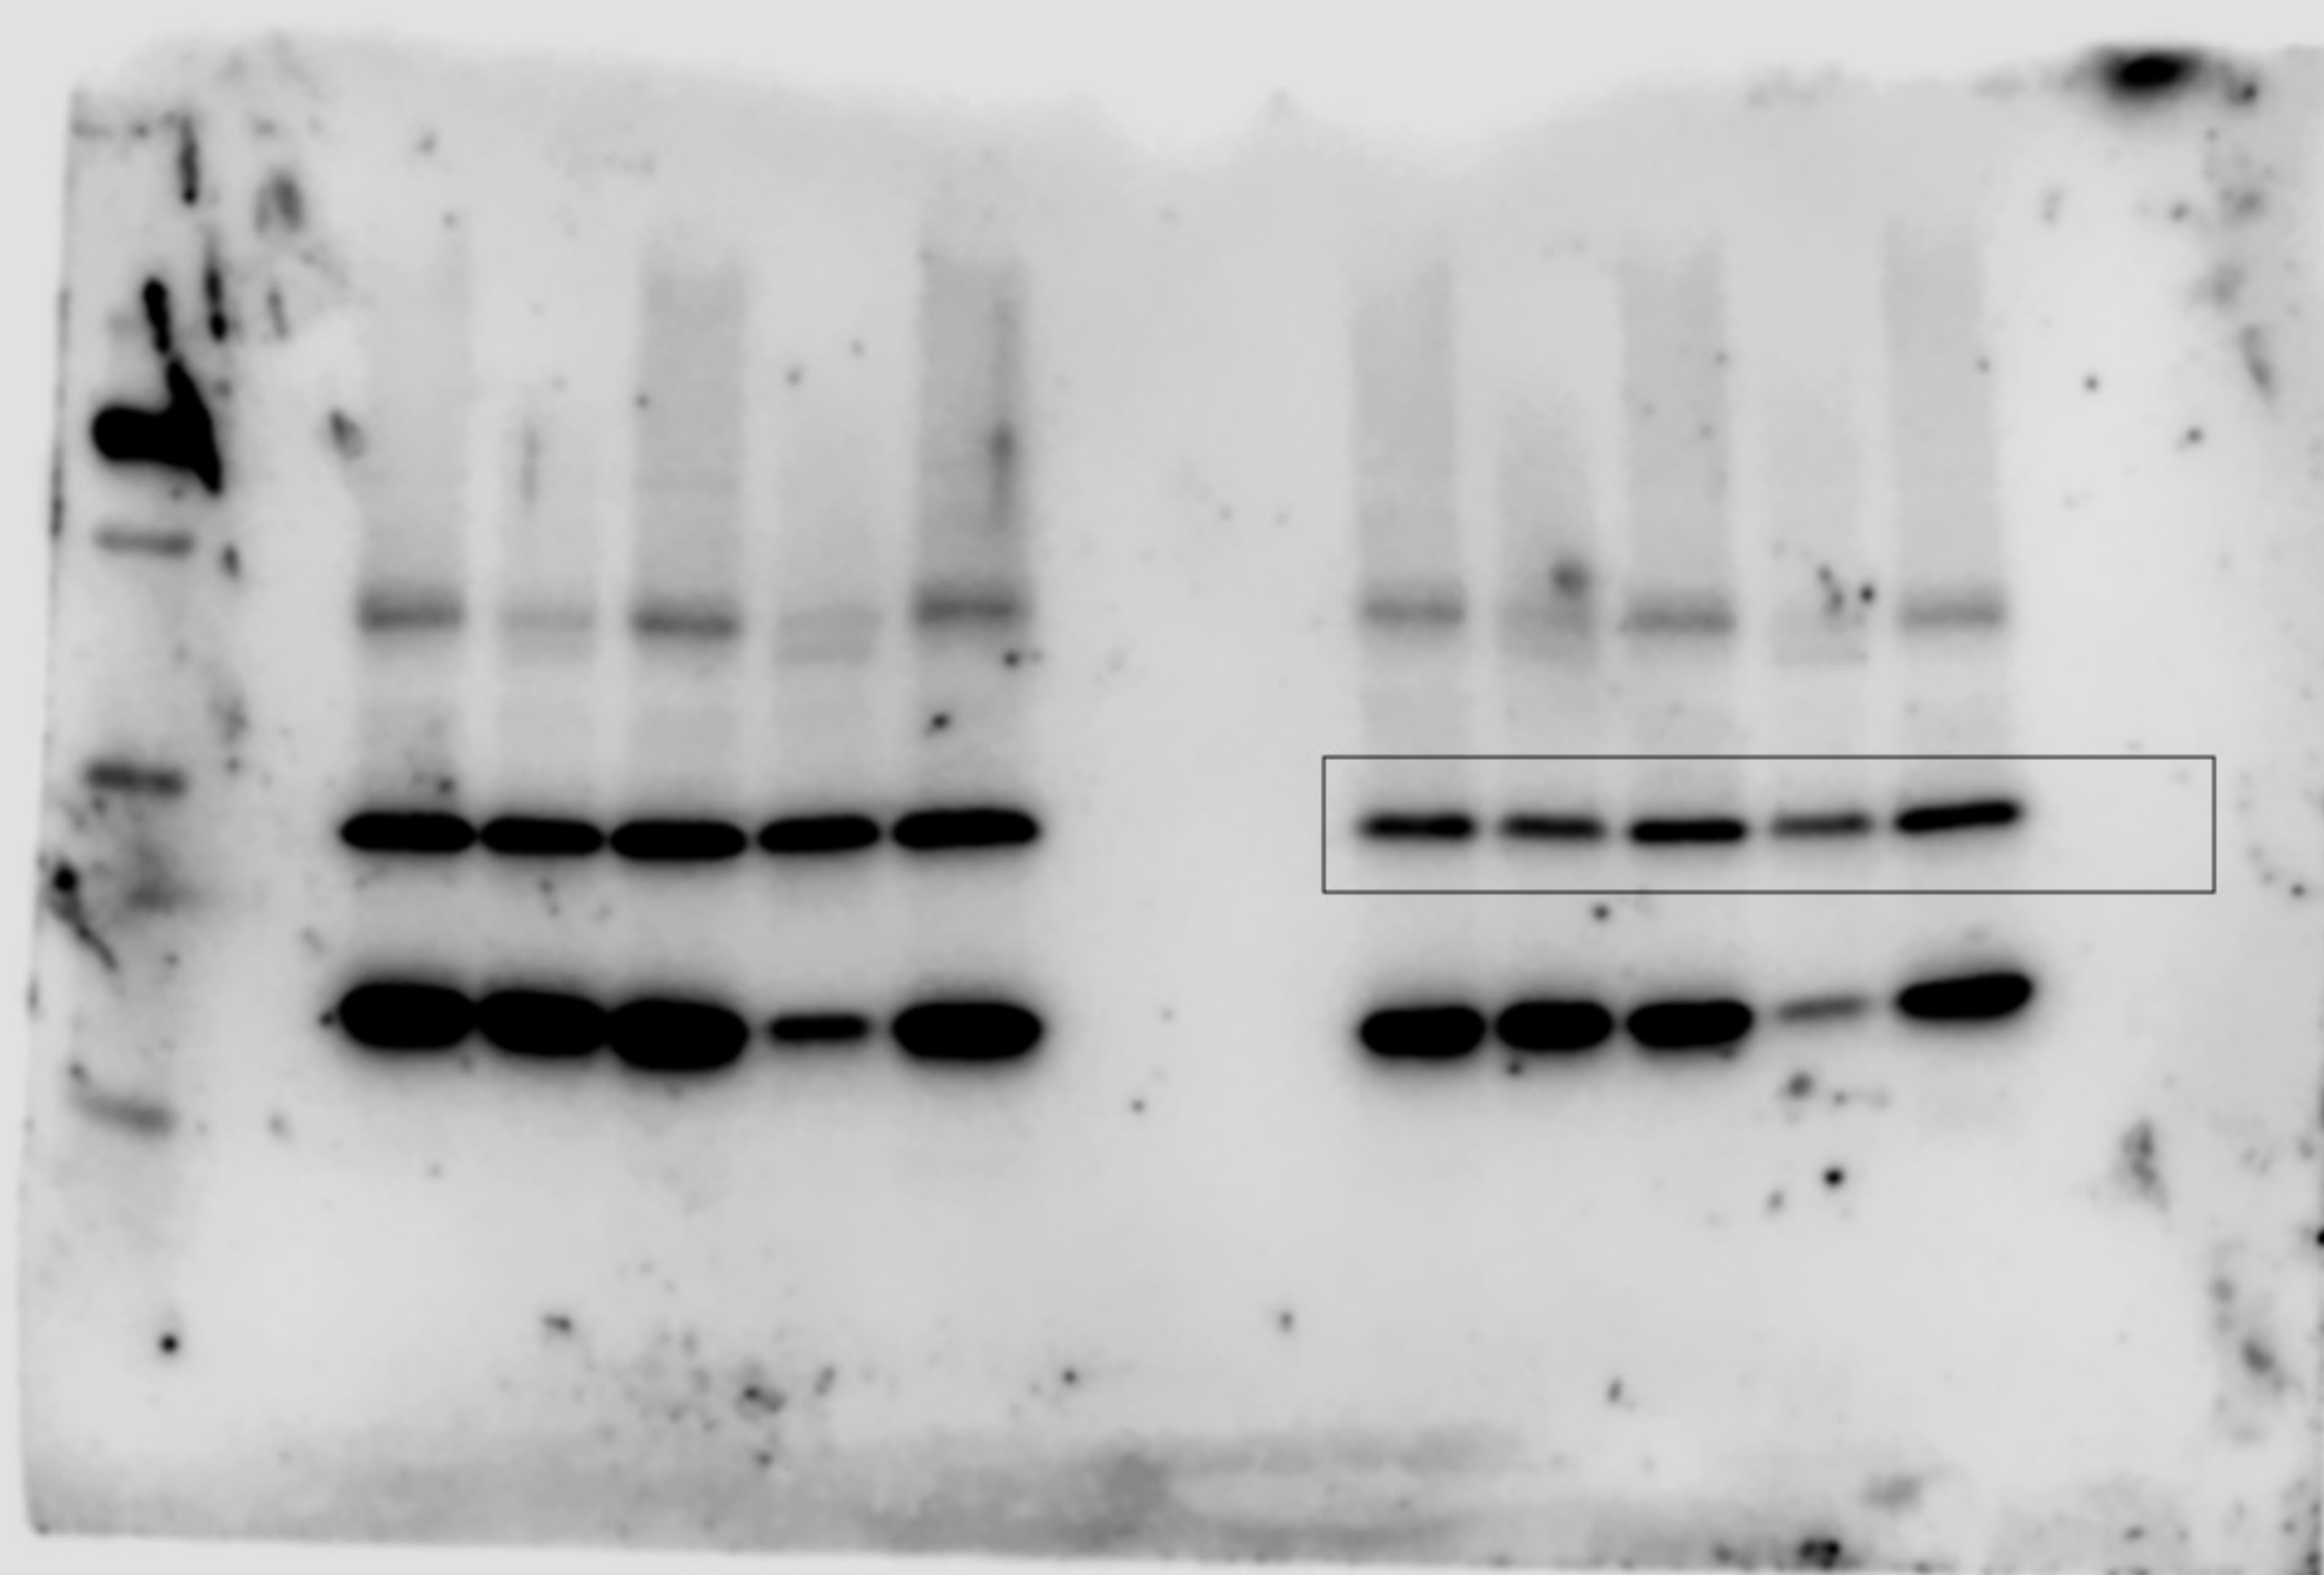

Cropped area for Figure 5D  
Ant1(A123D)-HA, anti-HA

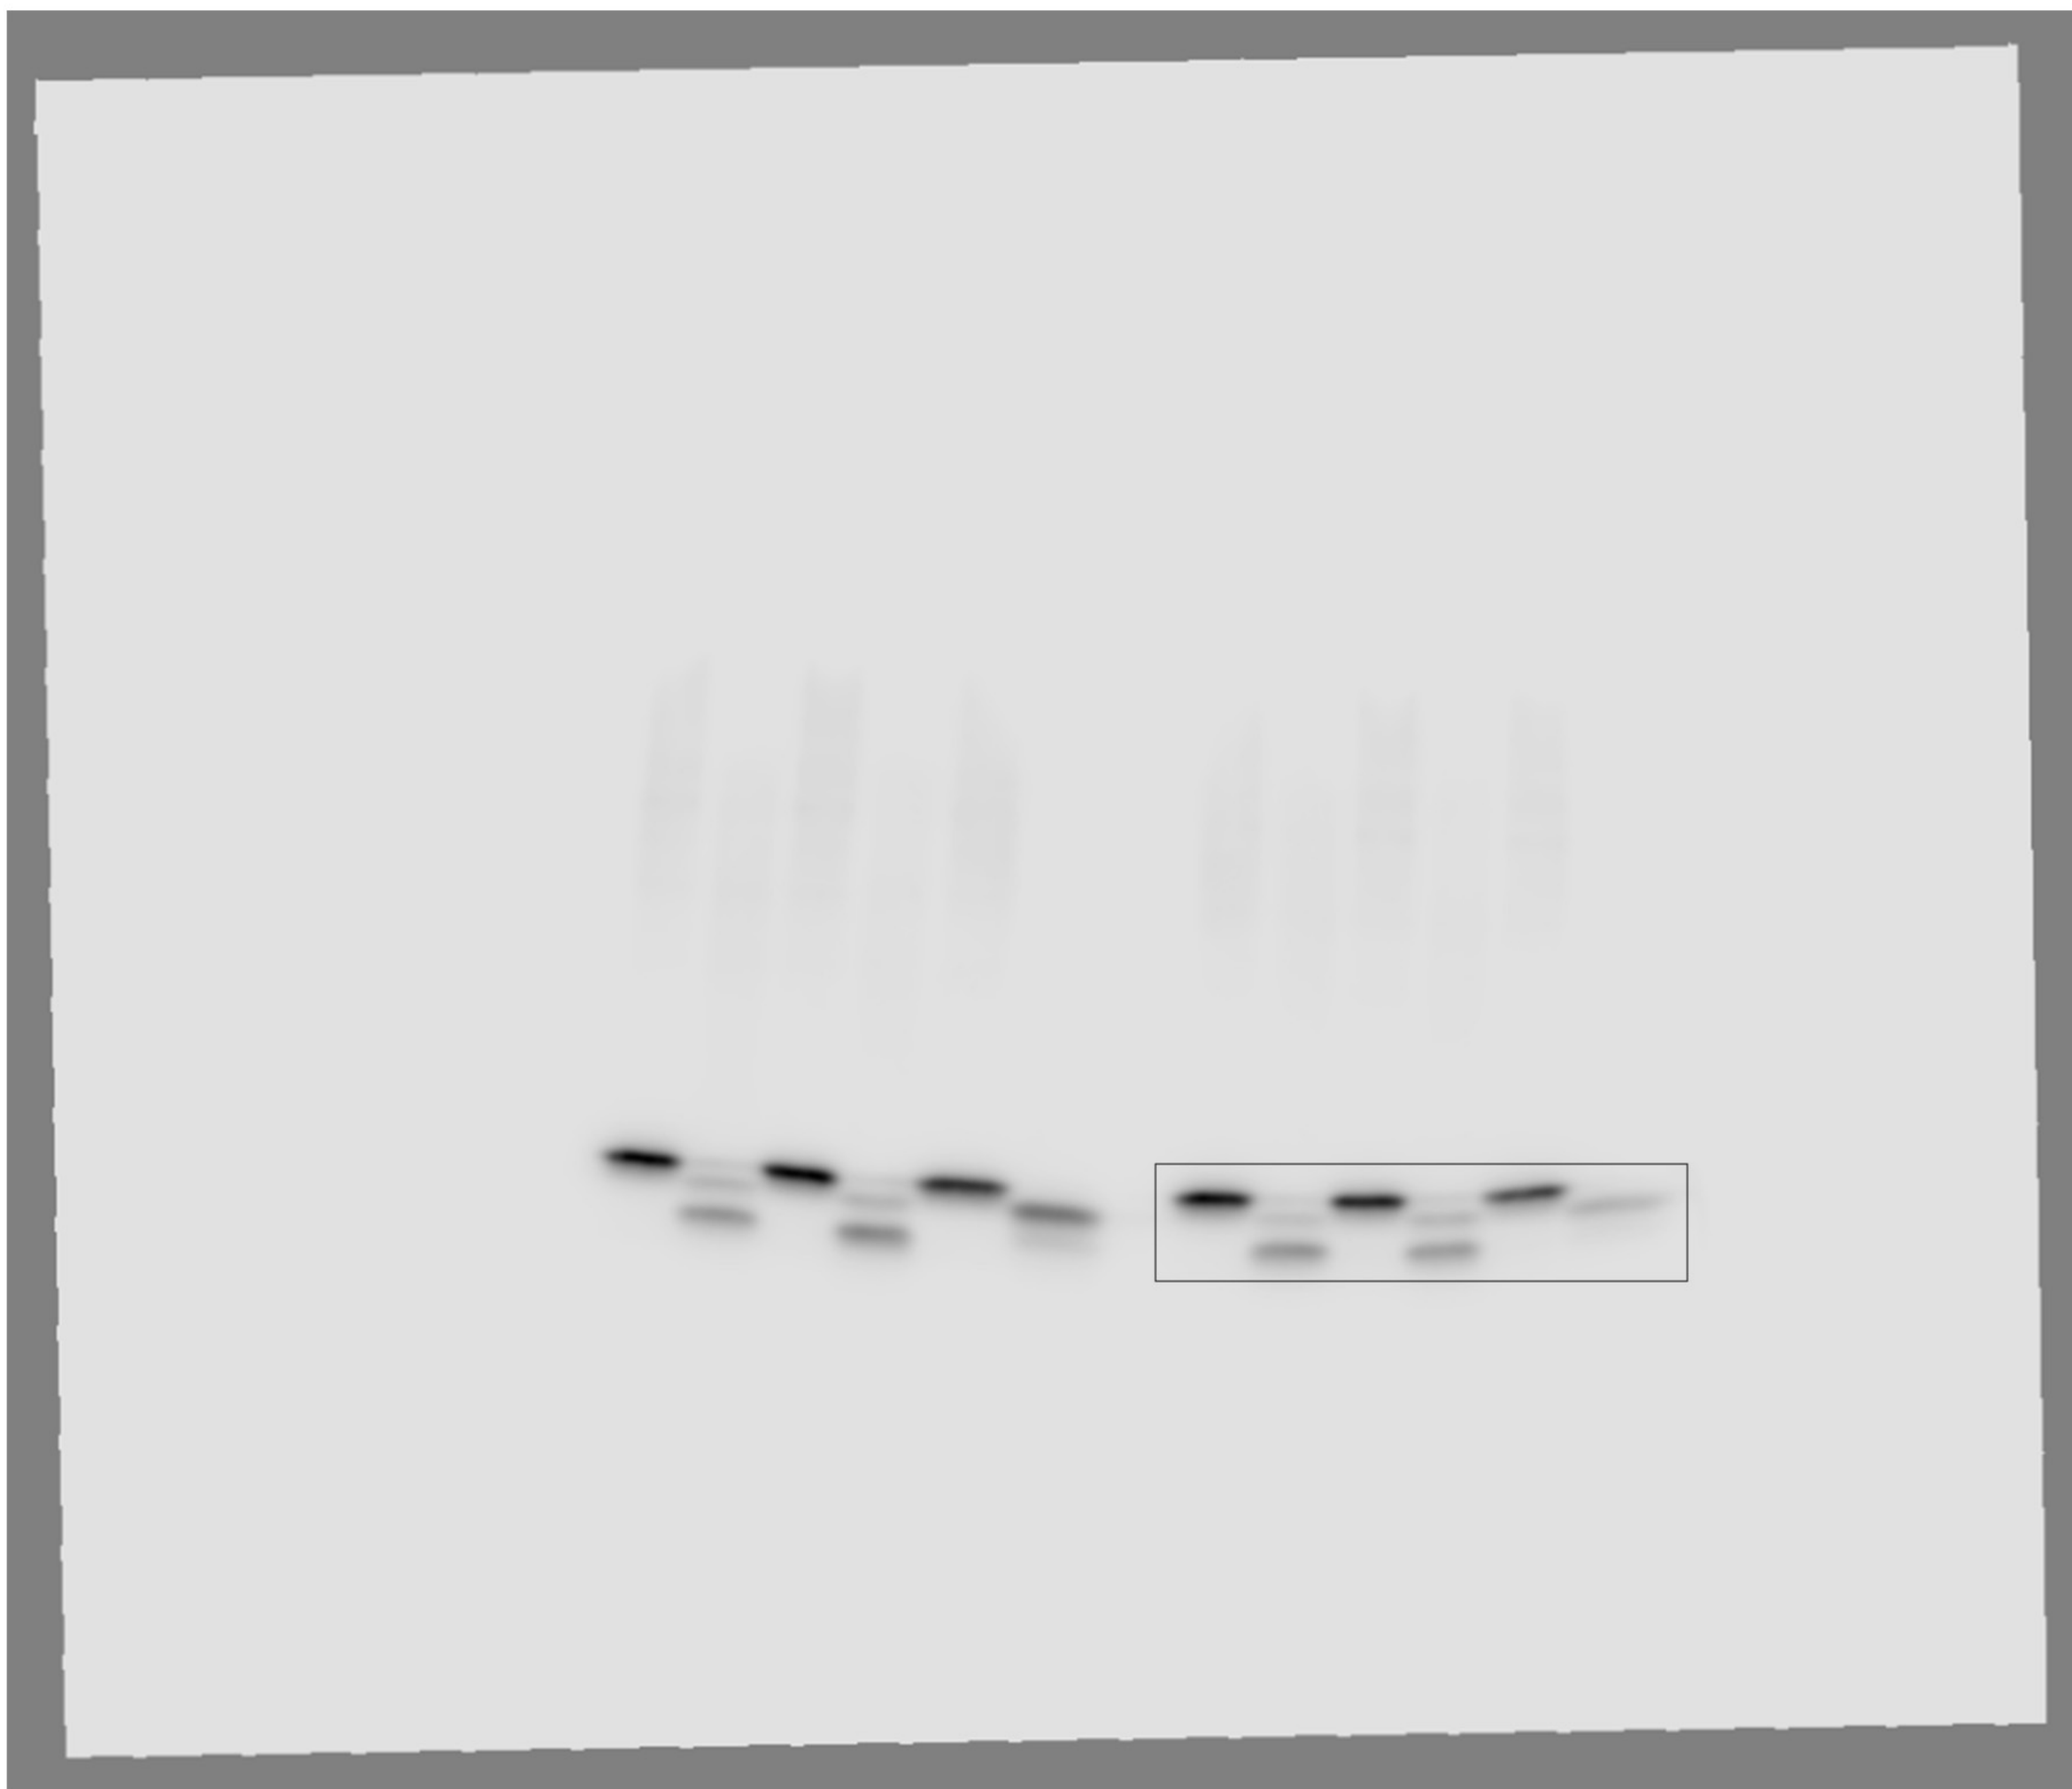

Cropped area for Figure 5D  
Ant1(A123D)-HA, anti-Tom20

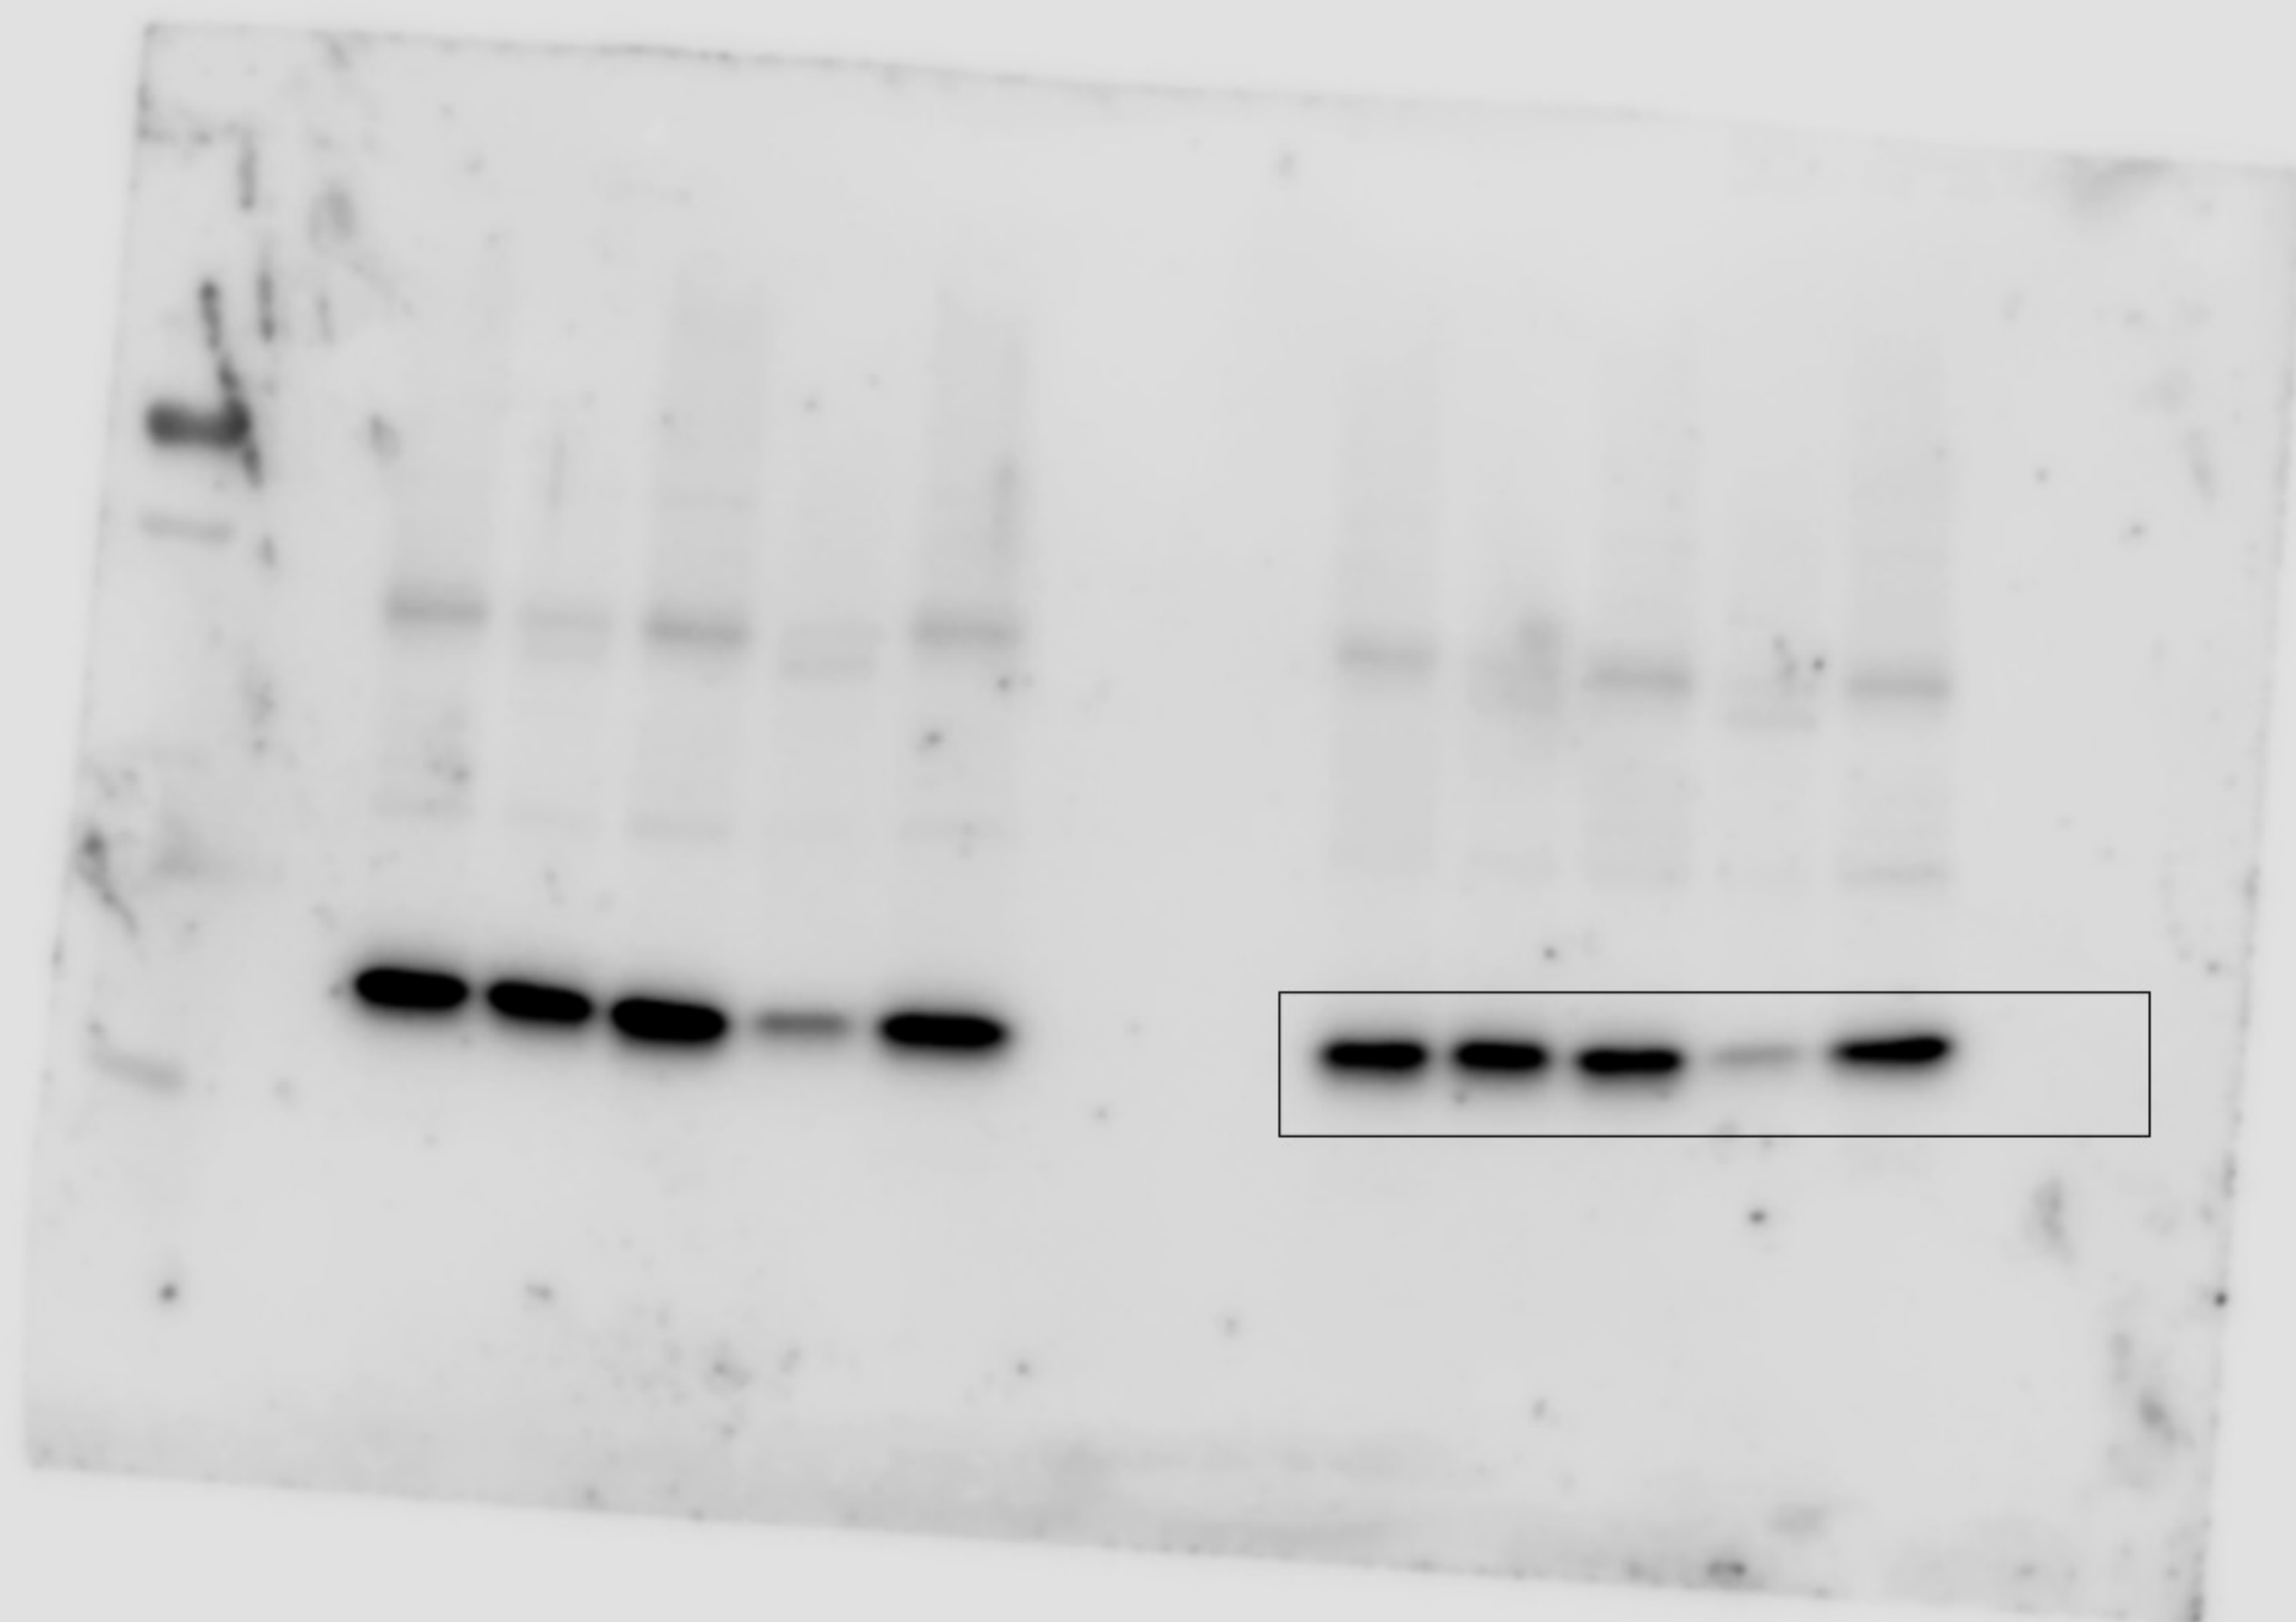

Cropped area for Figure 5D  
Ant1(A123D)-HA, anti-Smac



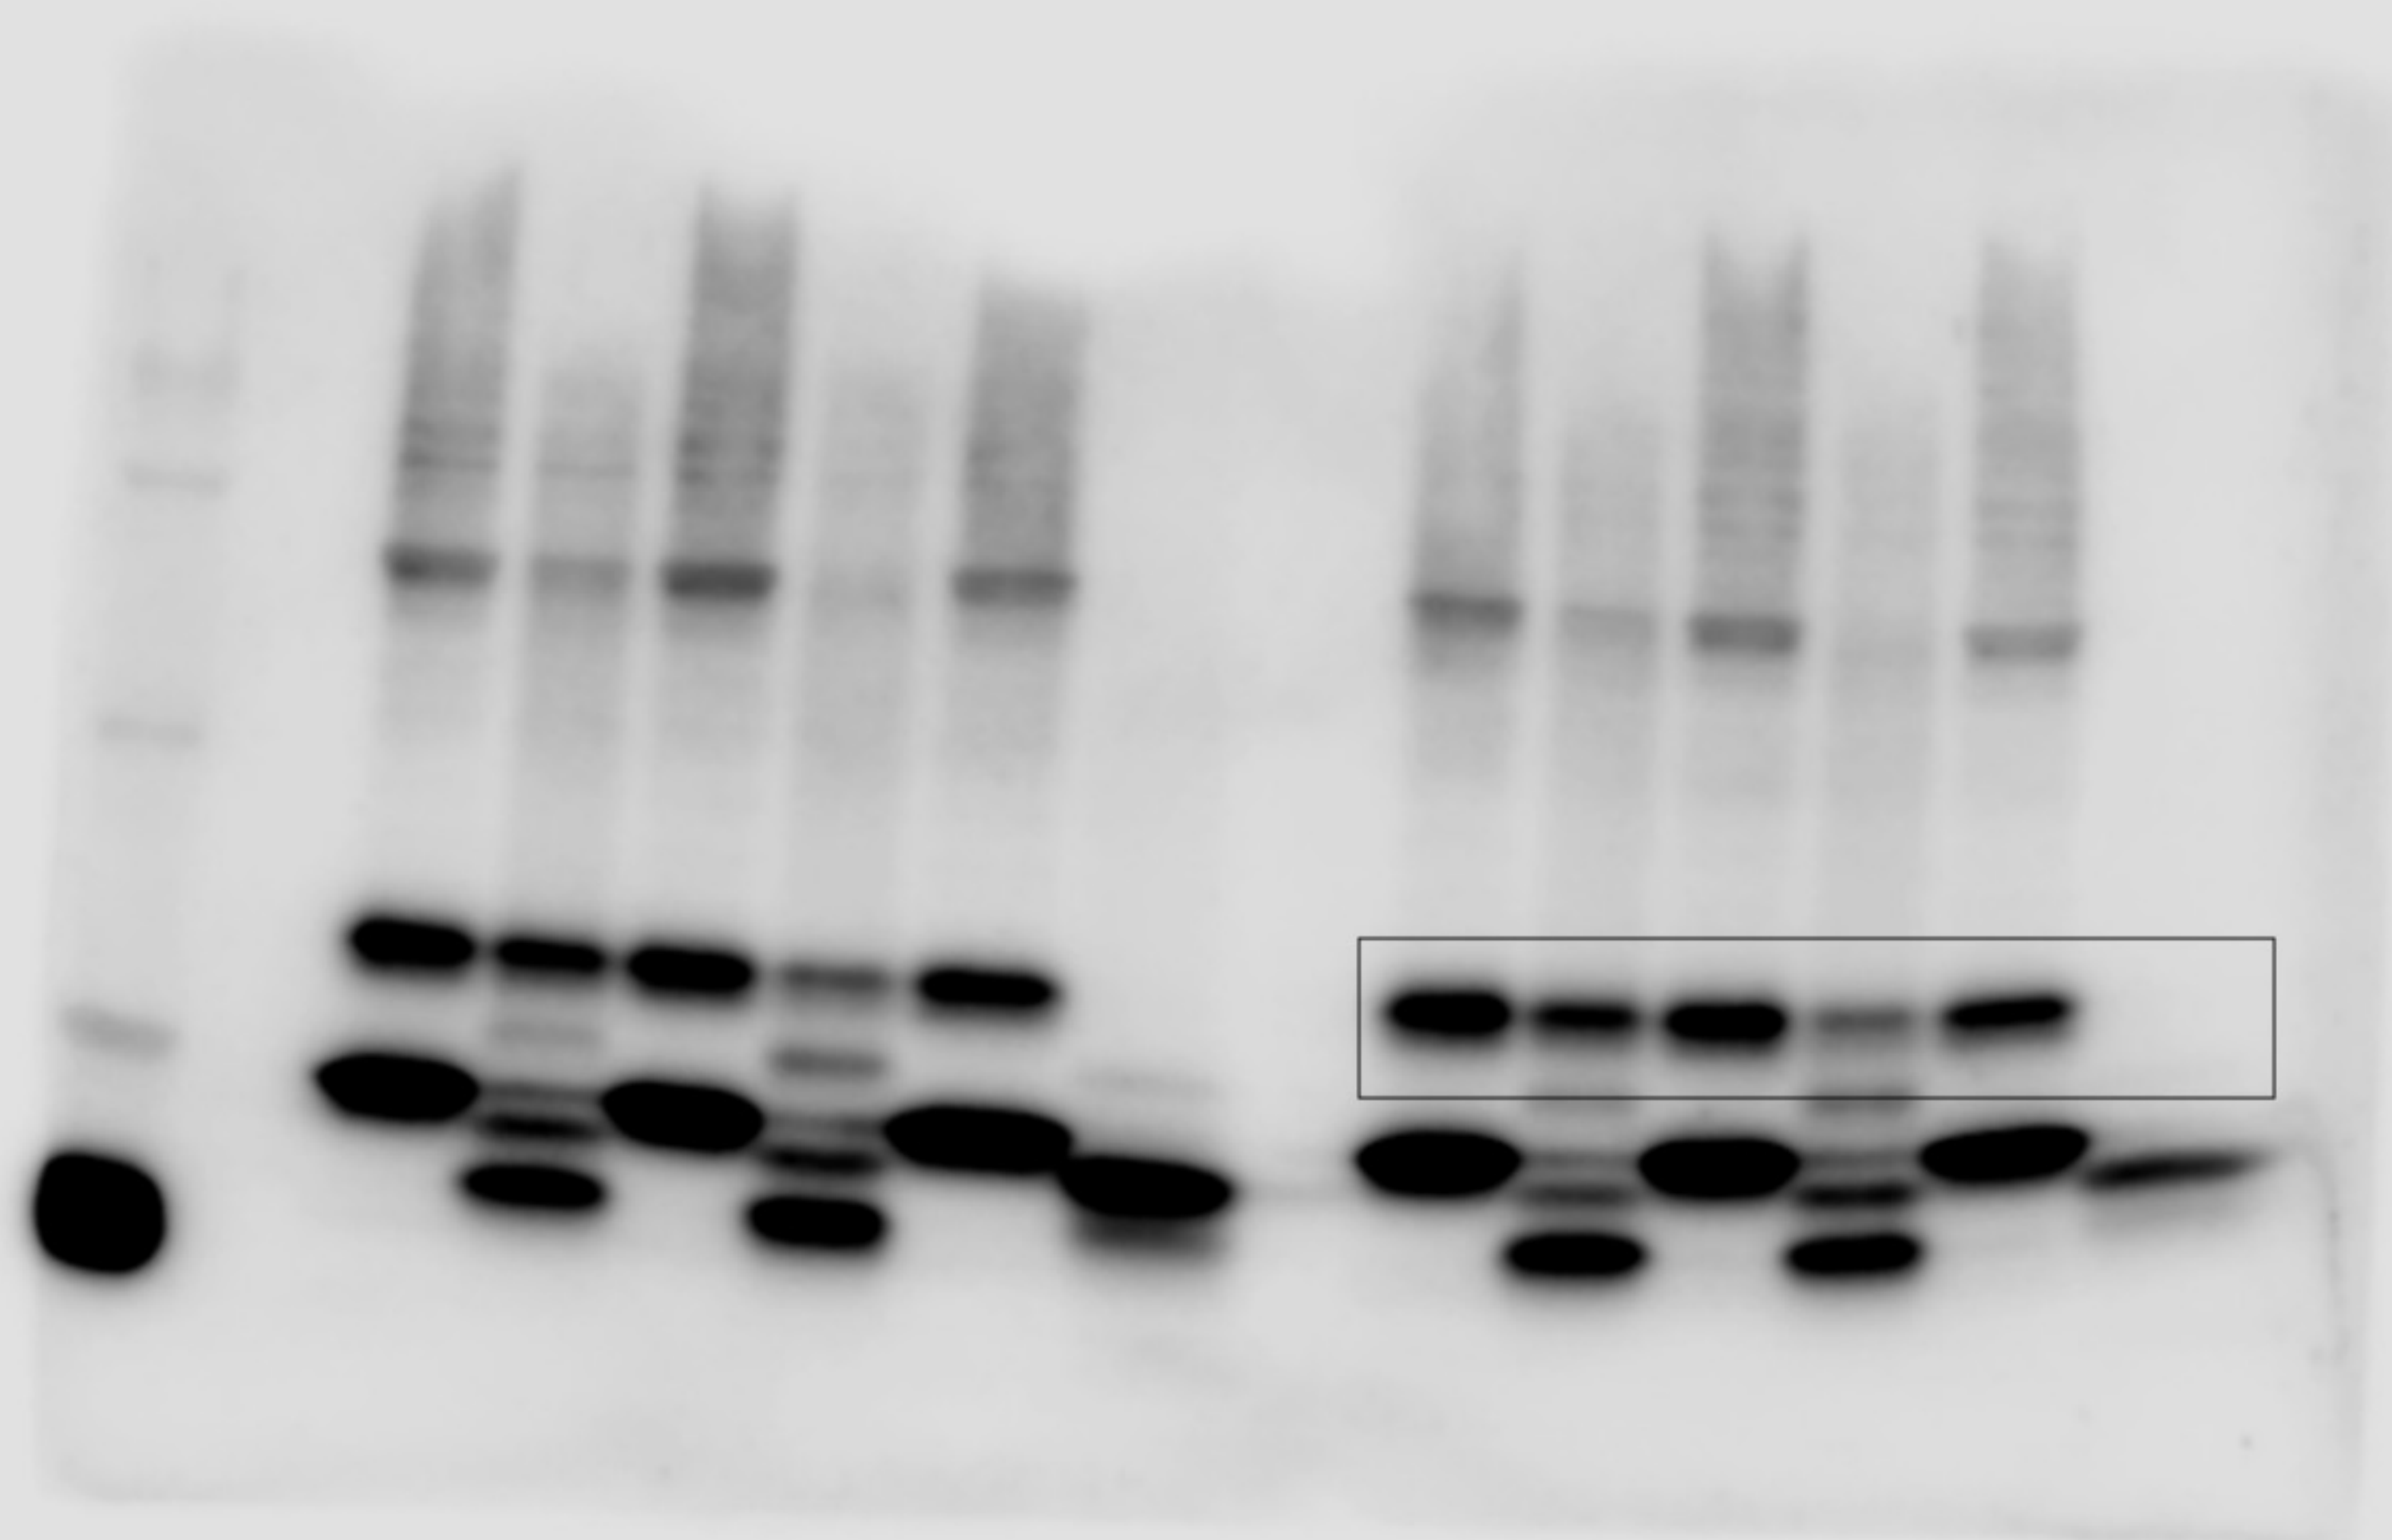

Cropped area for Figure 5D  
Ant1(A123D)-HA, anti-Tim22

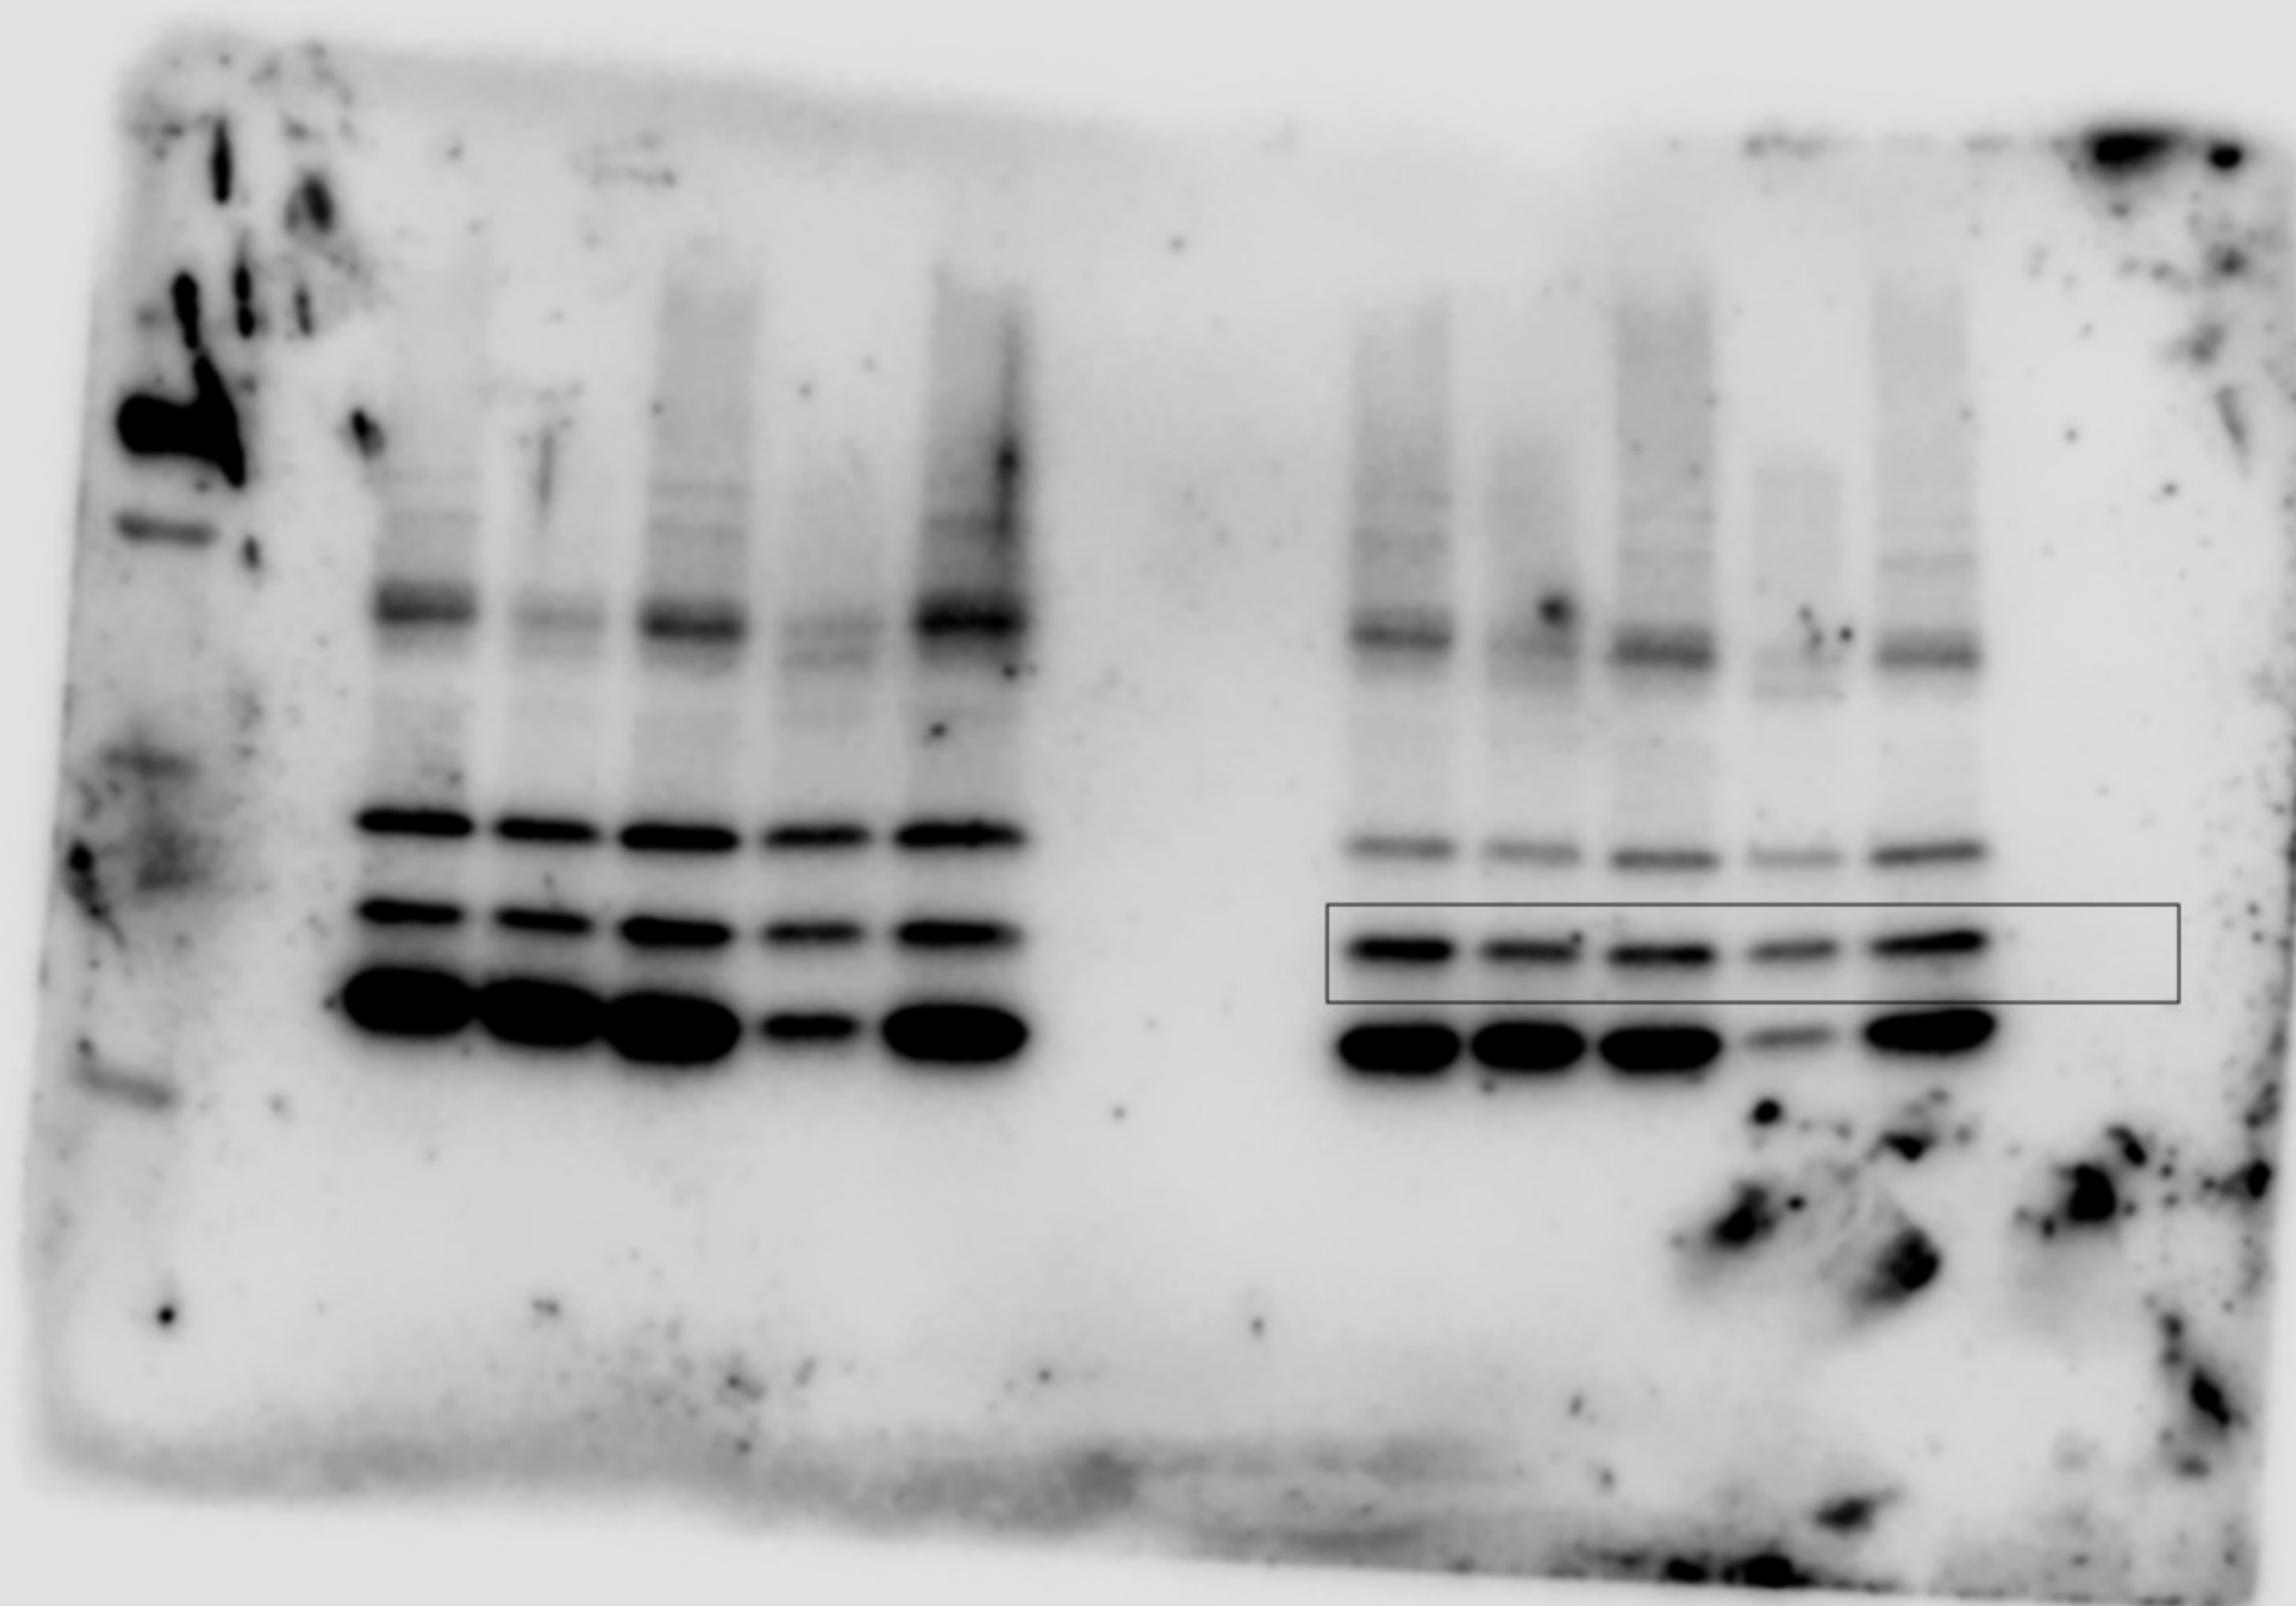

Cropped area for Figure 5D  
Ant1(A123D)-HA, anti-TFAM

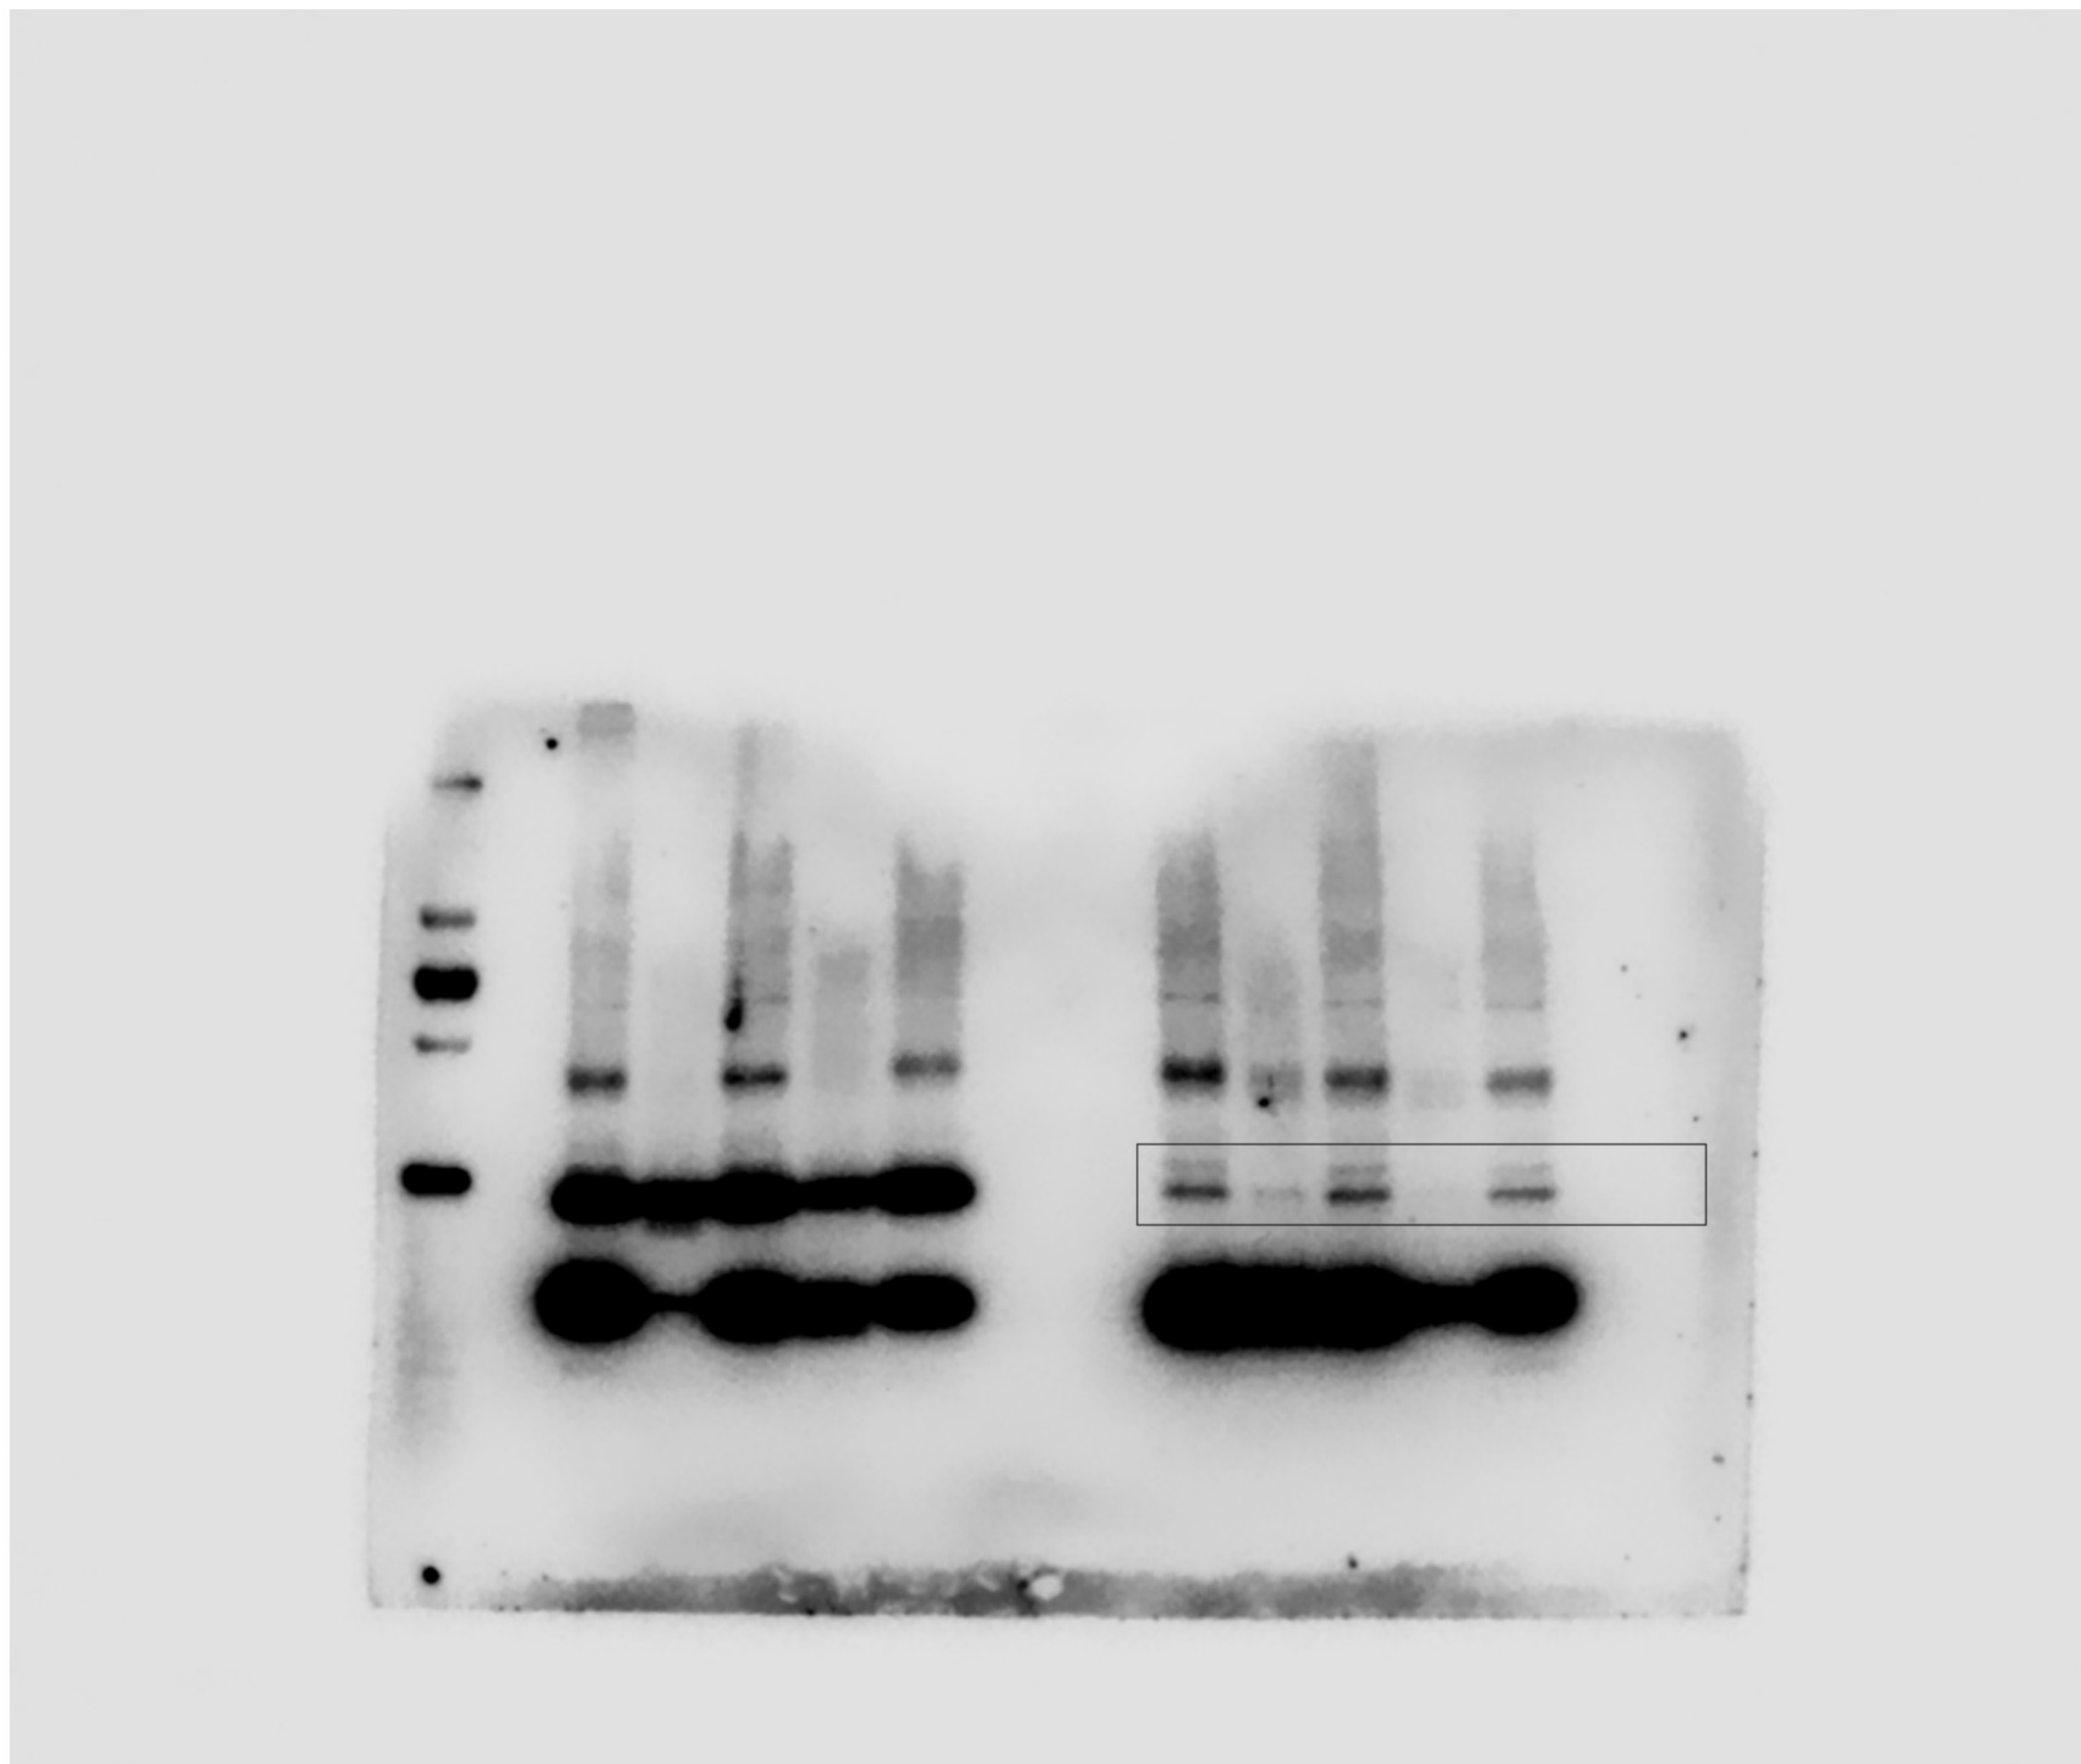

Cropped area for Figure 5D  
Ant1(A114P,A123D)-HA, anti-HA

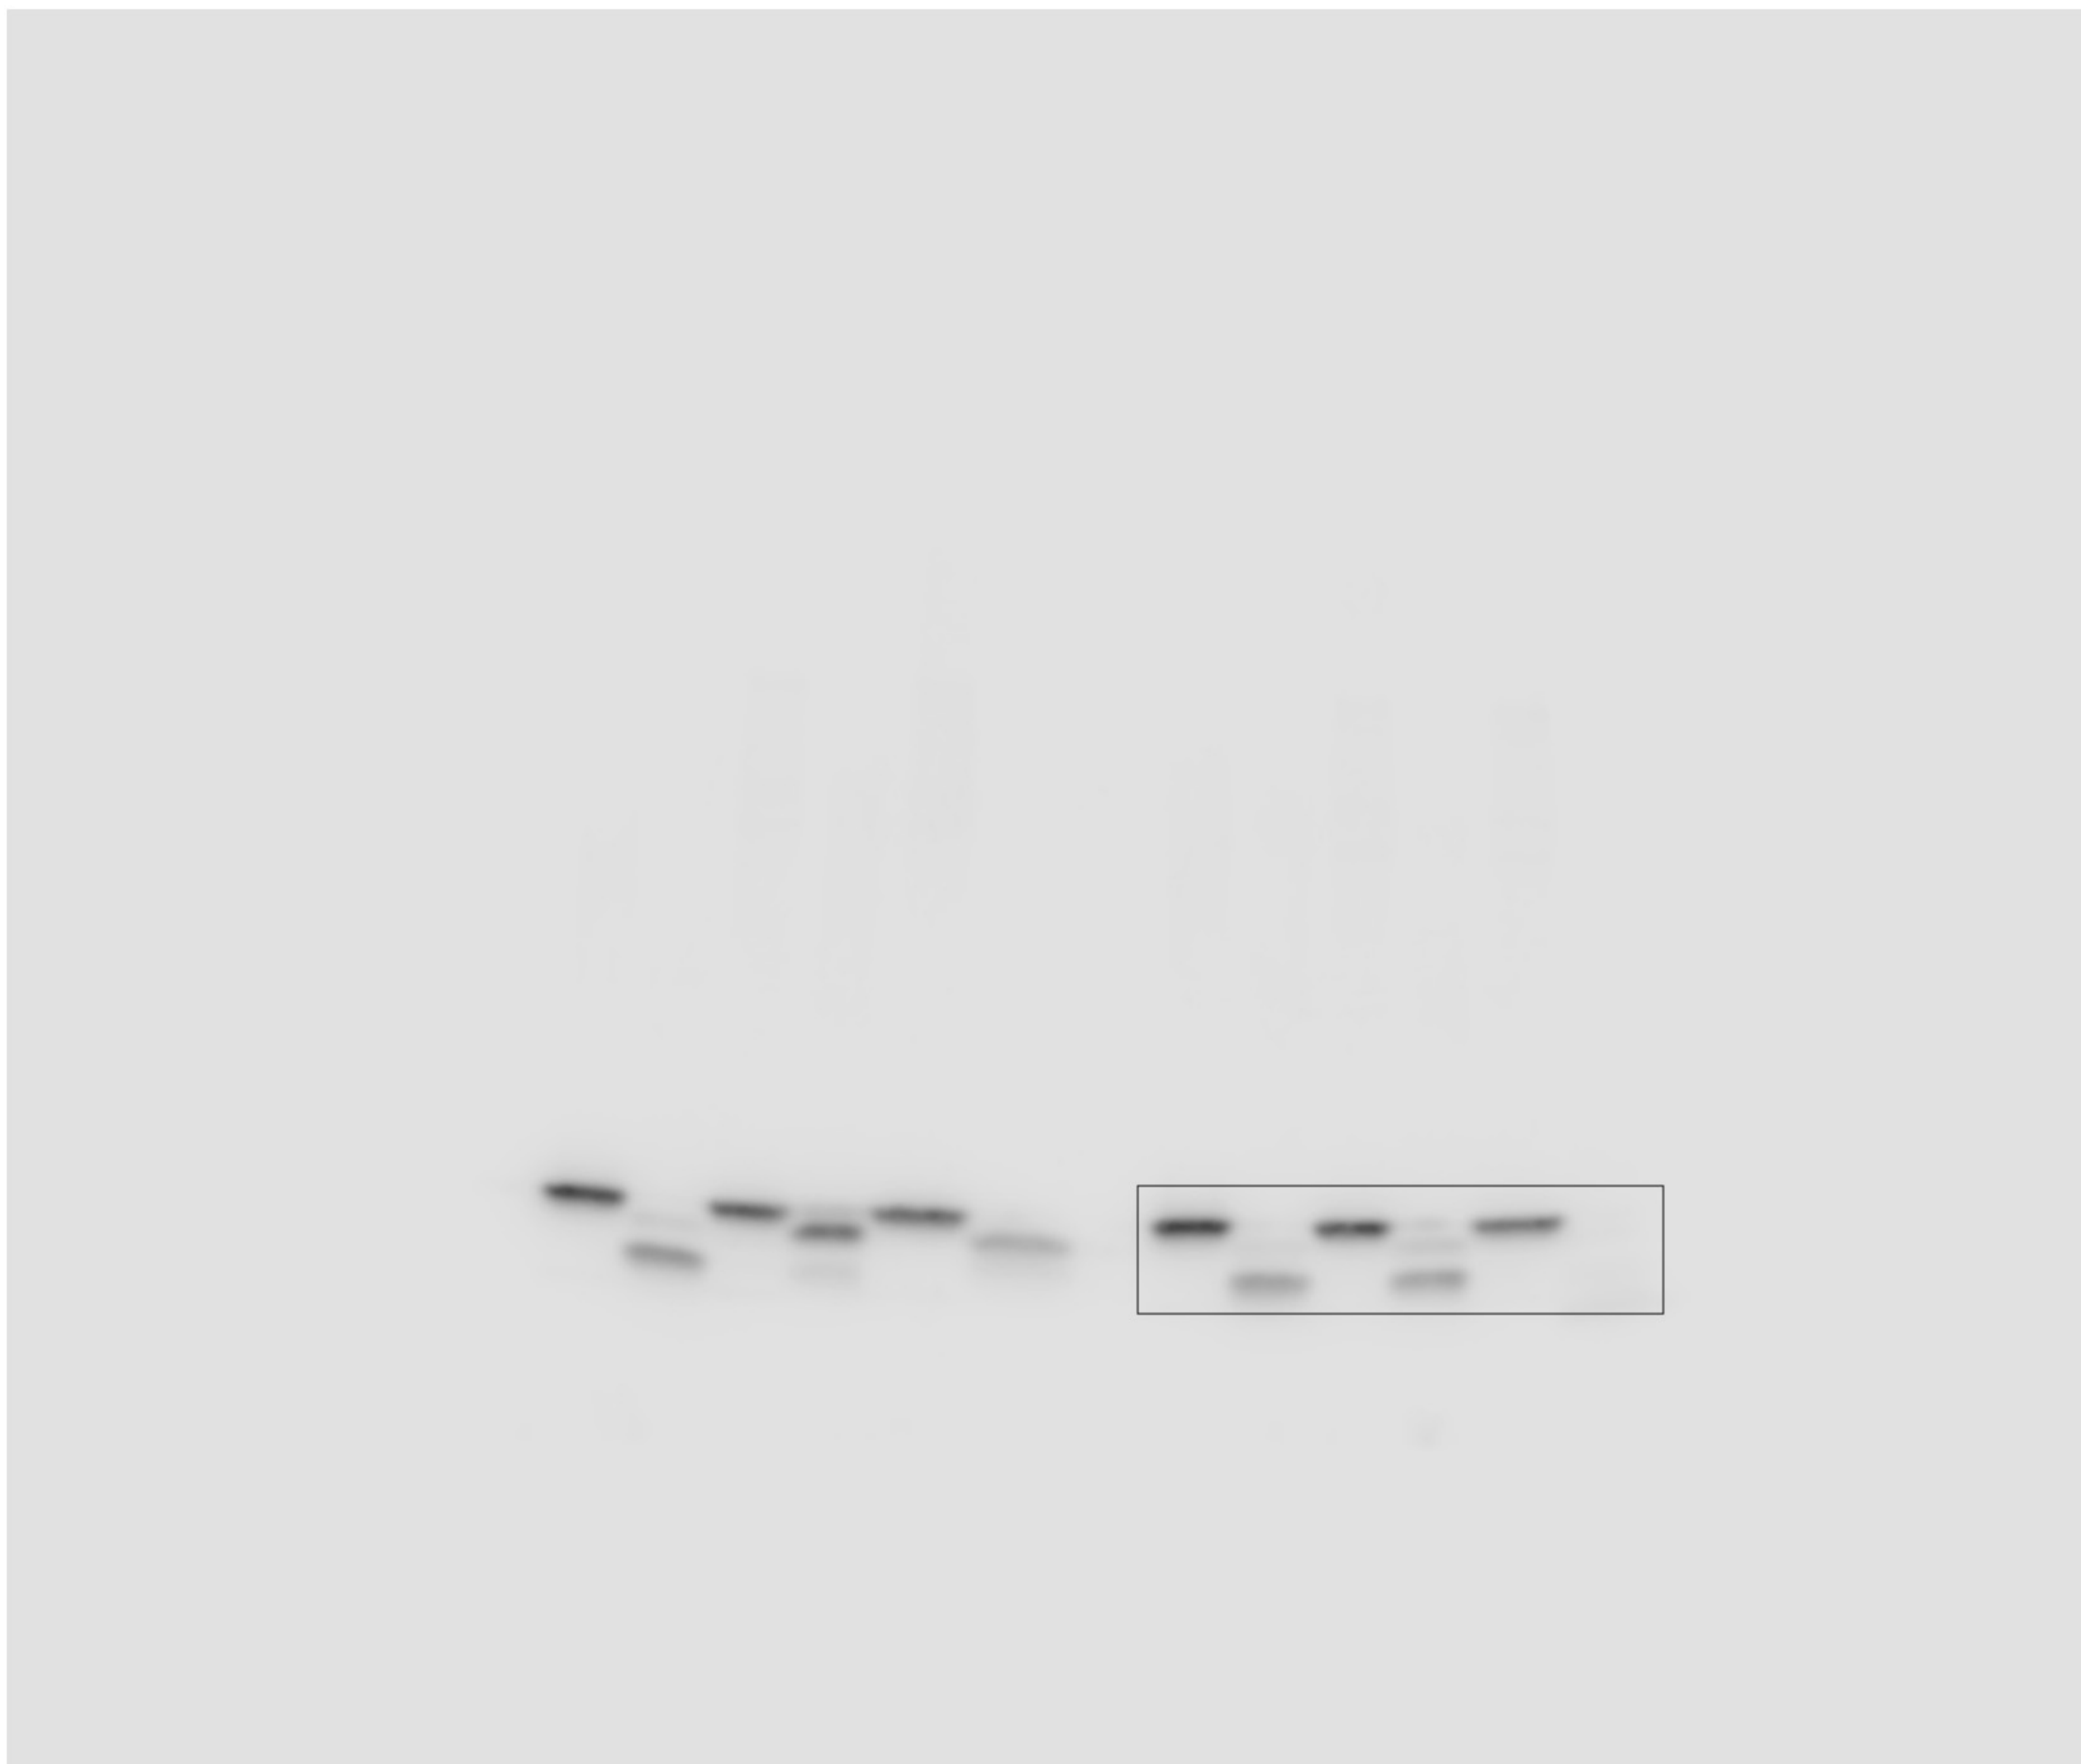

Cropped area for Figure 5D  
Ant1(A114P,A123D)-HA, anti-Tom20

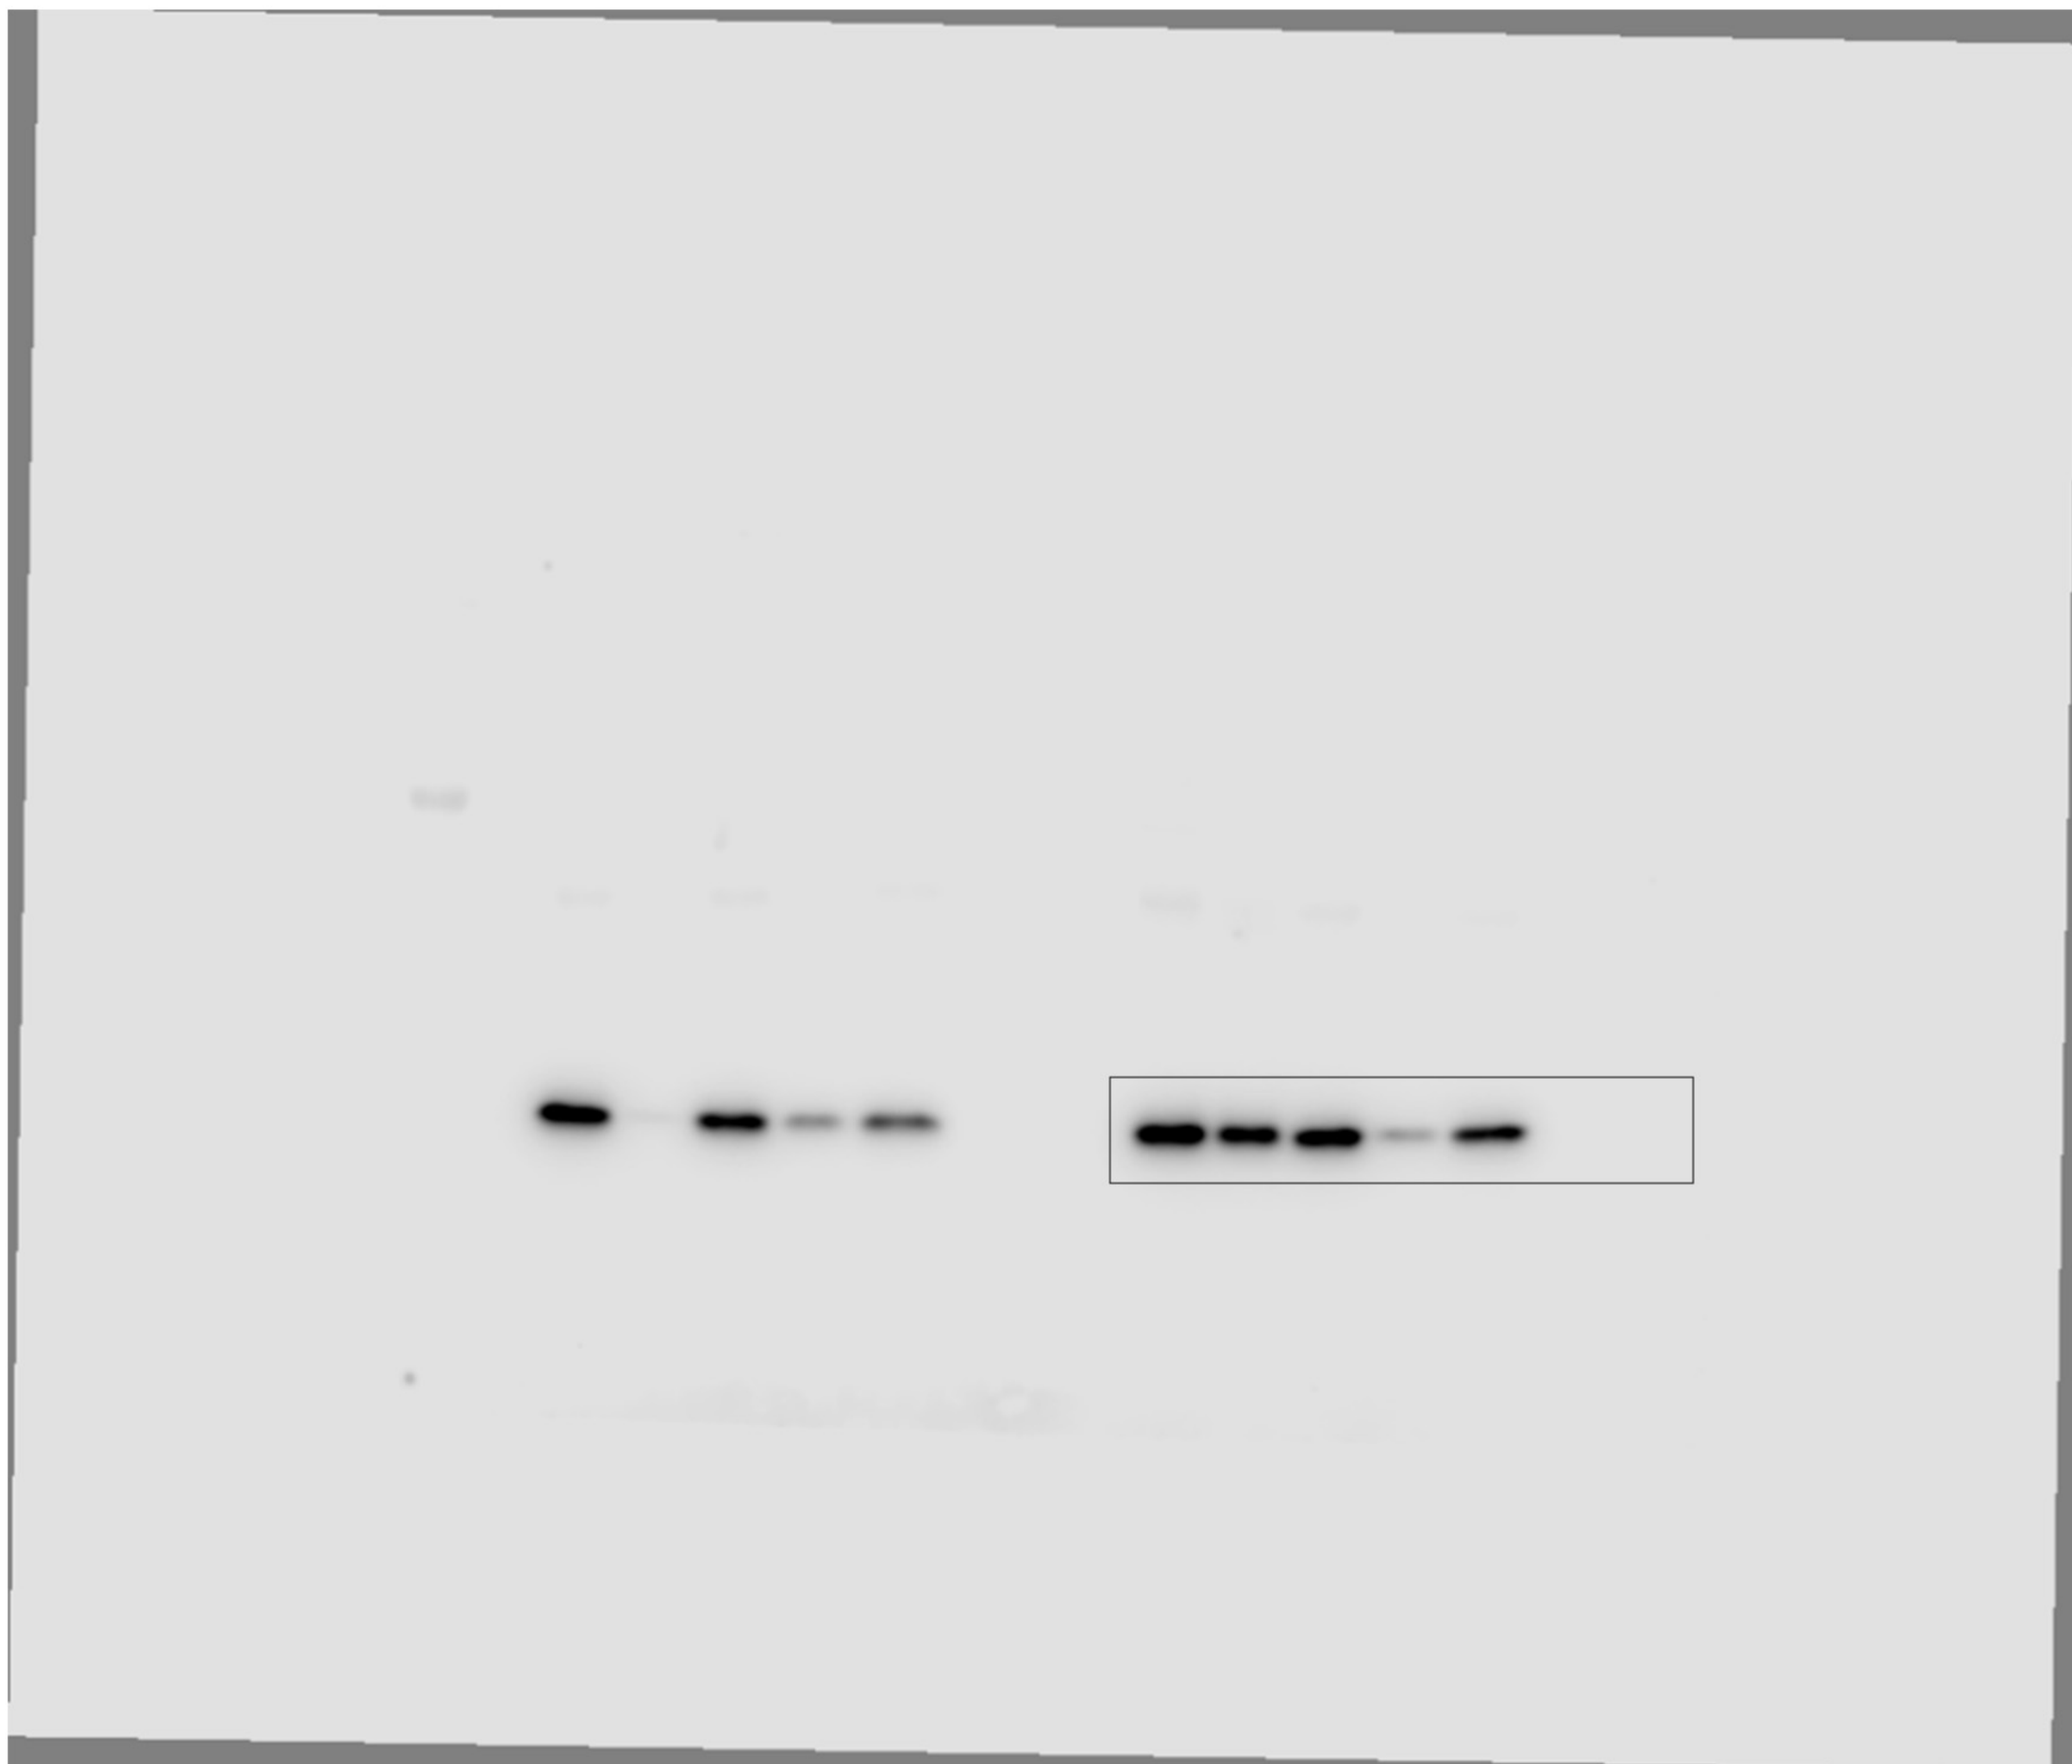

Cropped area for Figure 5D  
Ant1(A114P,A123D)-HA, anti-Smac

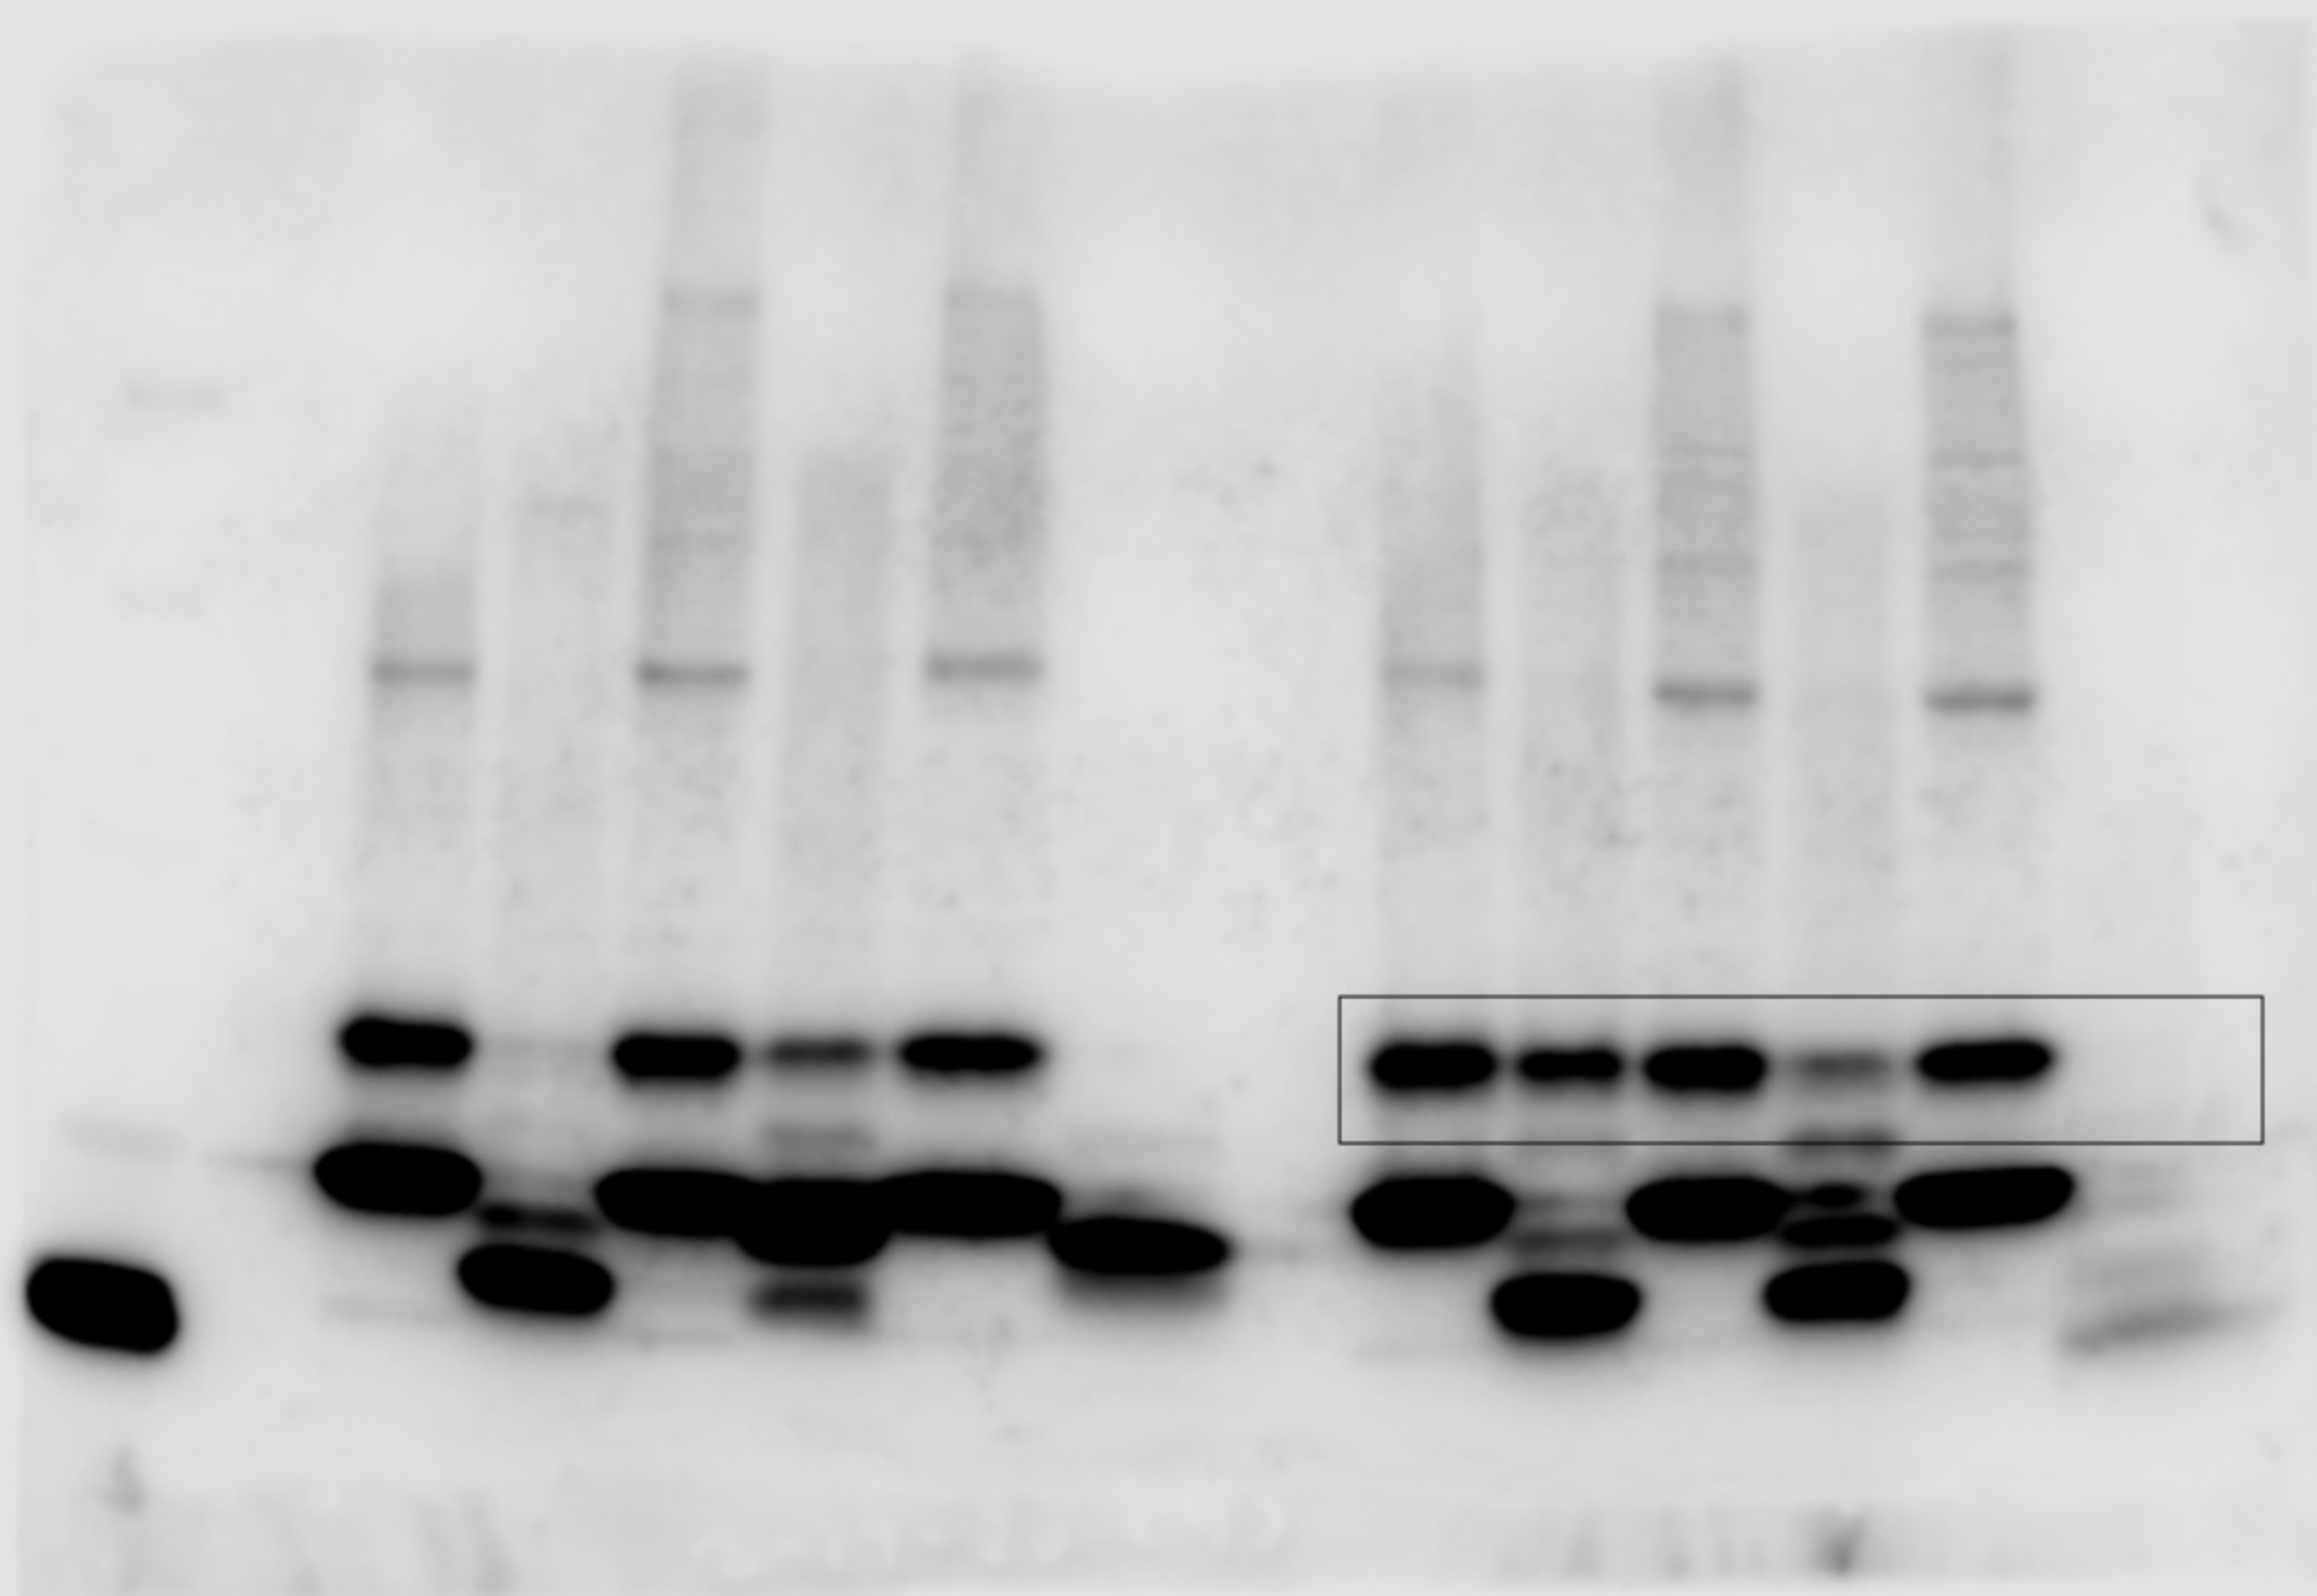

Cropped area for Figure 5D  
Ant1(A114P,A123D)-HA, anti-Tim22

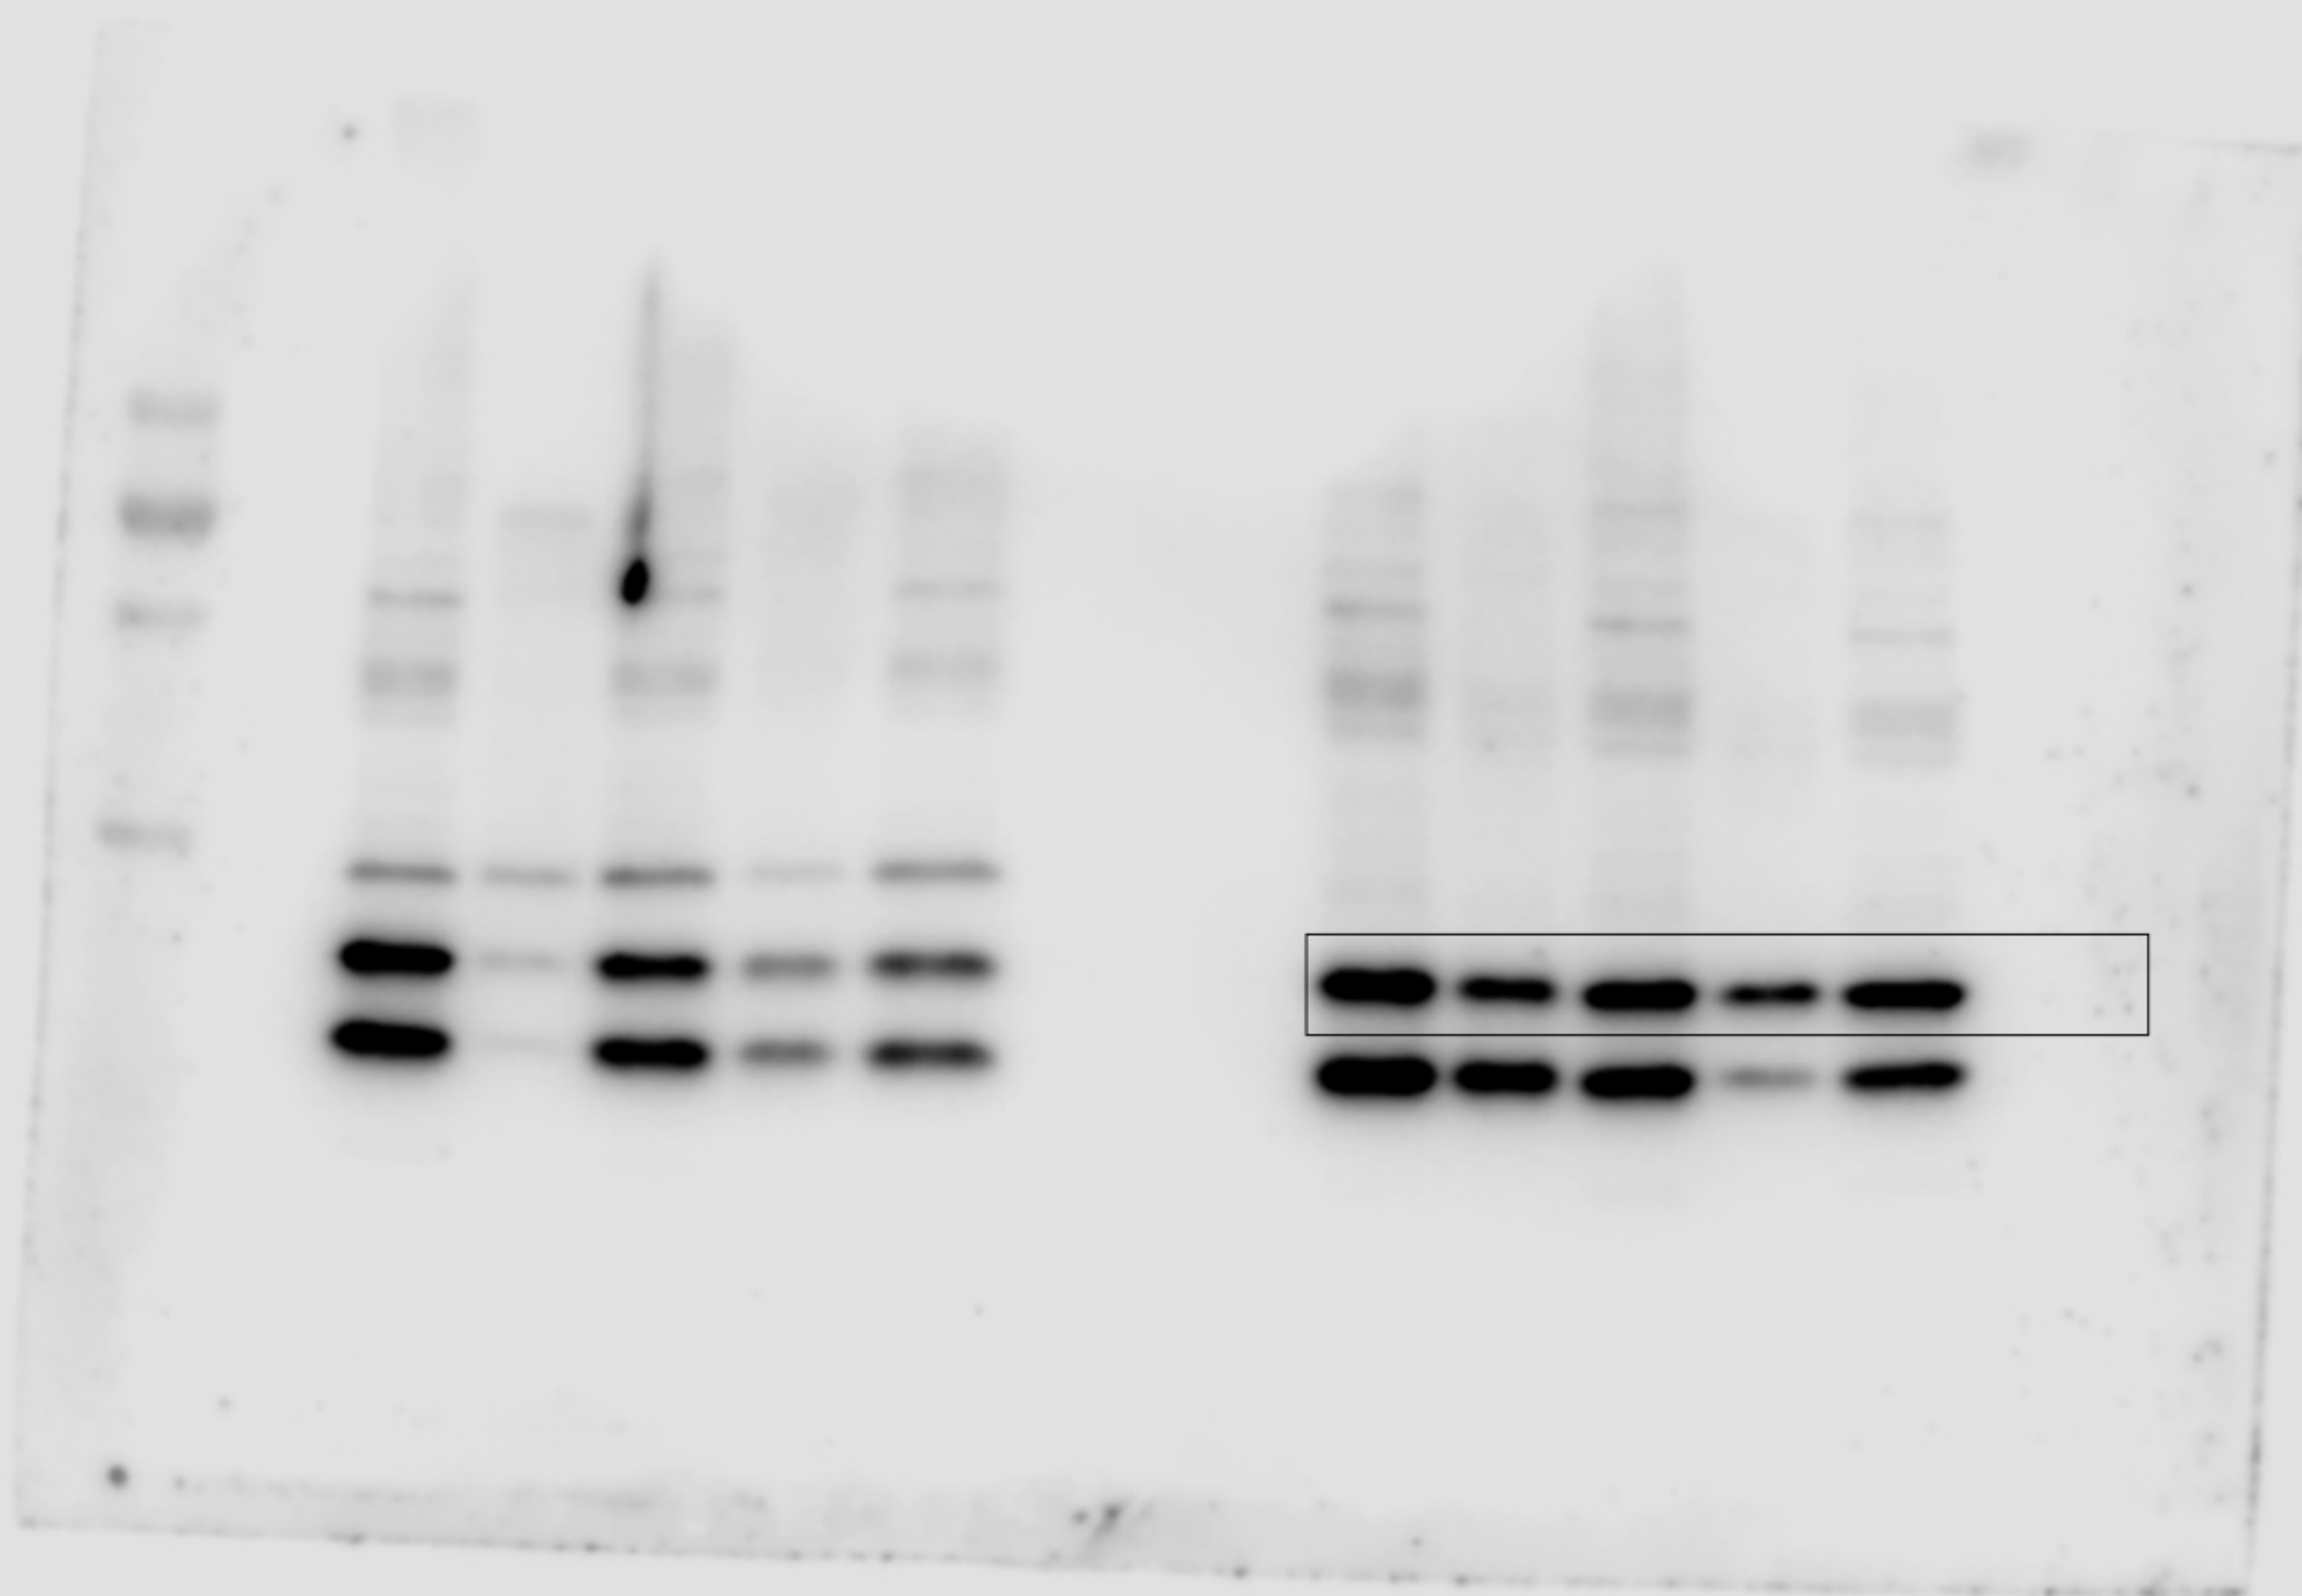

Cropped area for Figure 5D  
Ant1(A114P,A123D)-HA, anti-TFAM
