# Supplementary material for: Mitochondrial protein import clogging as a mechanism of disease
Source: eLife journal article supplement (doi:10.7554/elife.84330), 2023-05-02
Supplement: fig8-data2 [file elife-84330-fig8-data2-v2.zip]

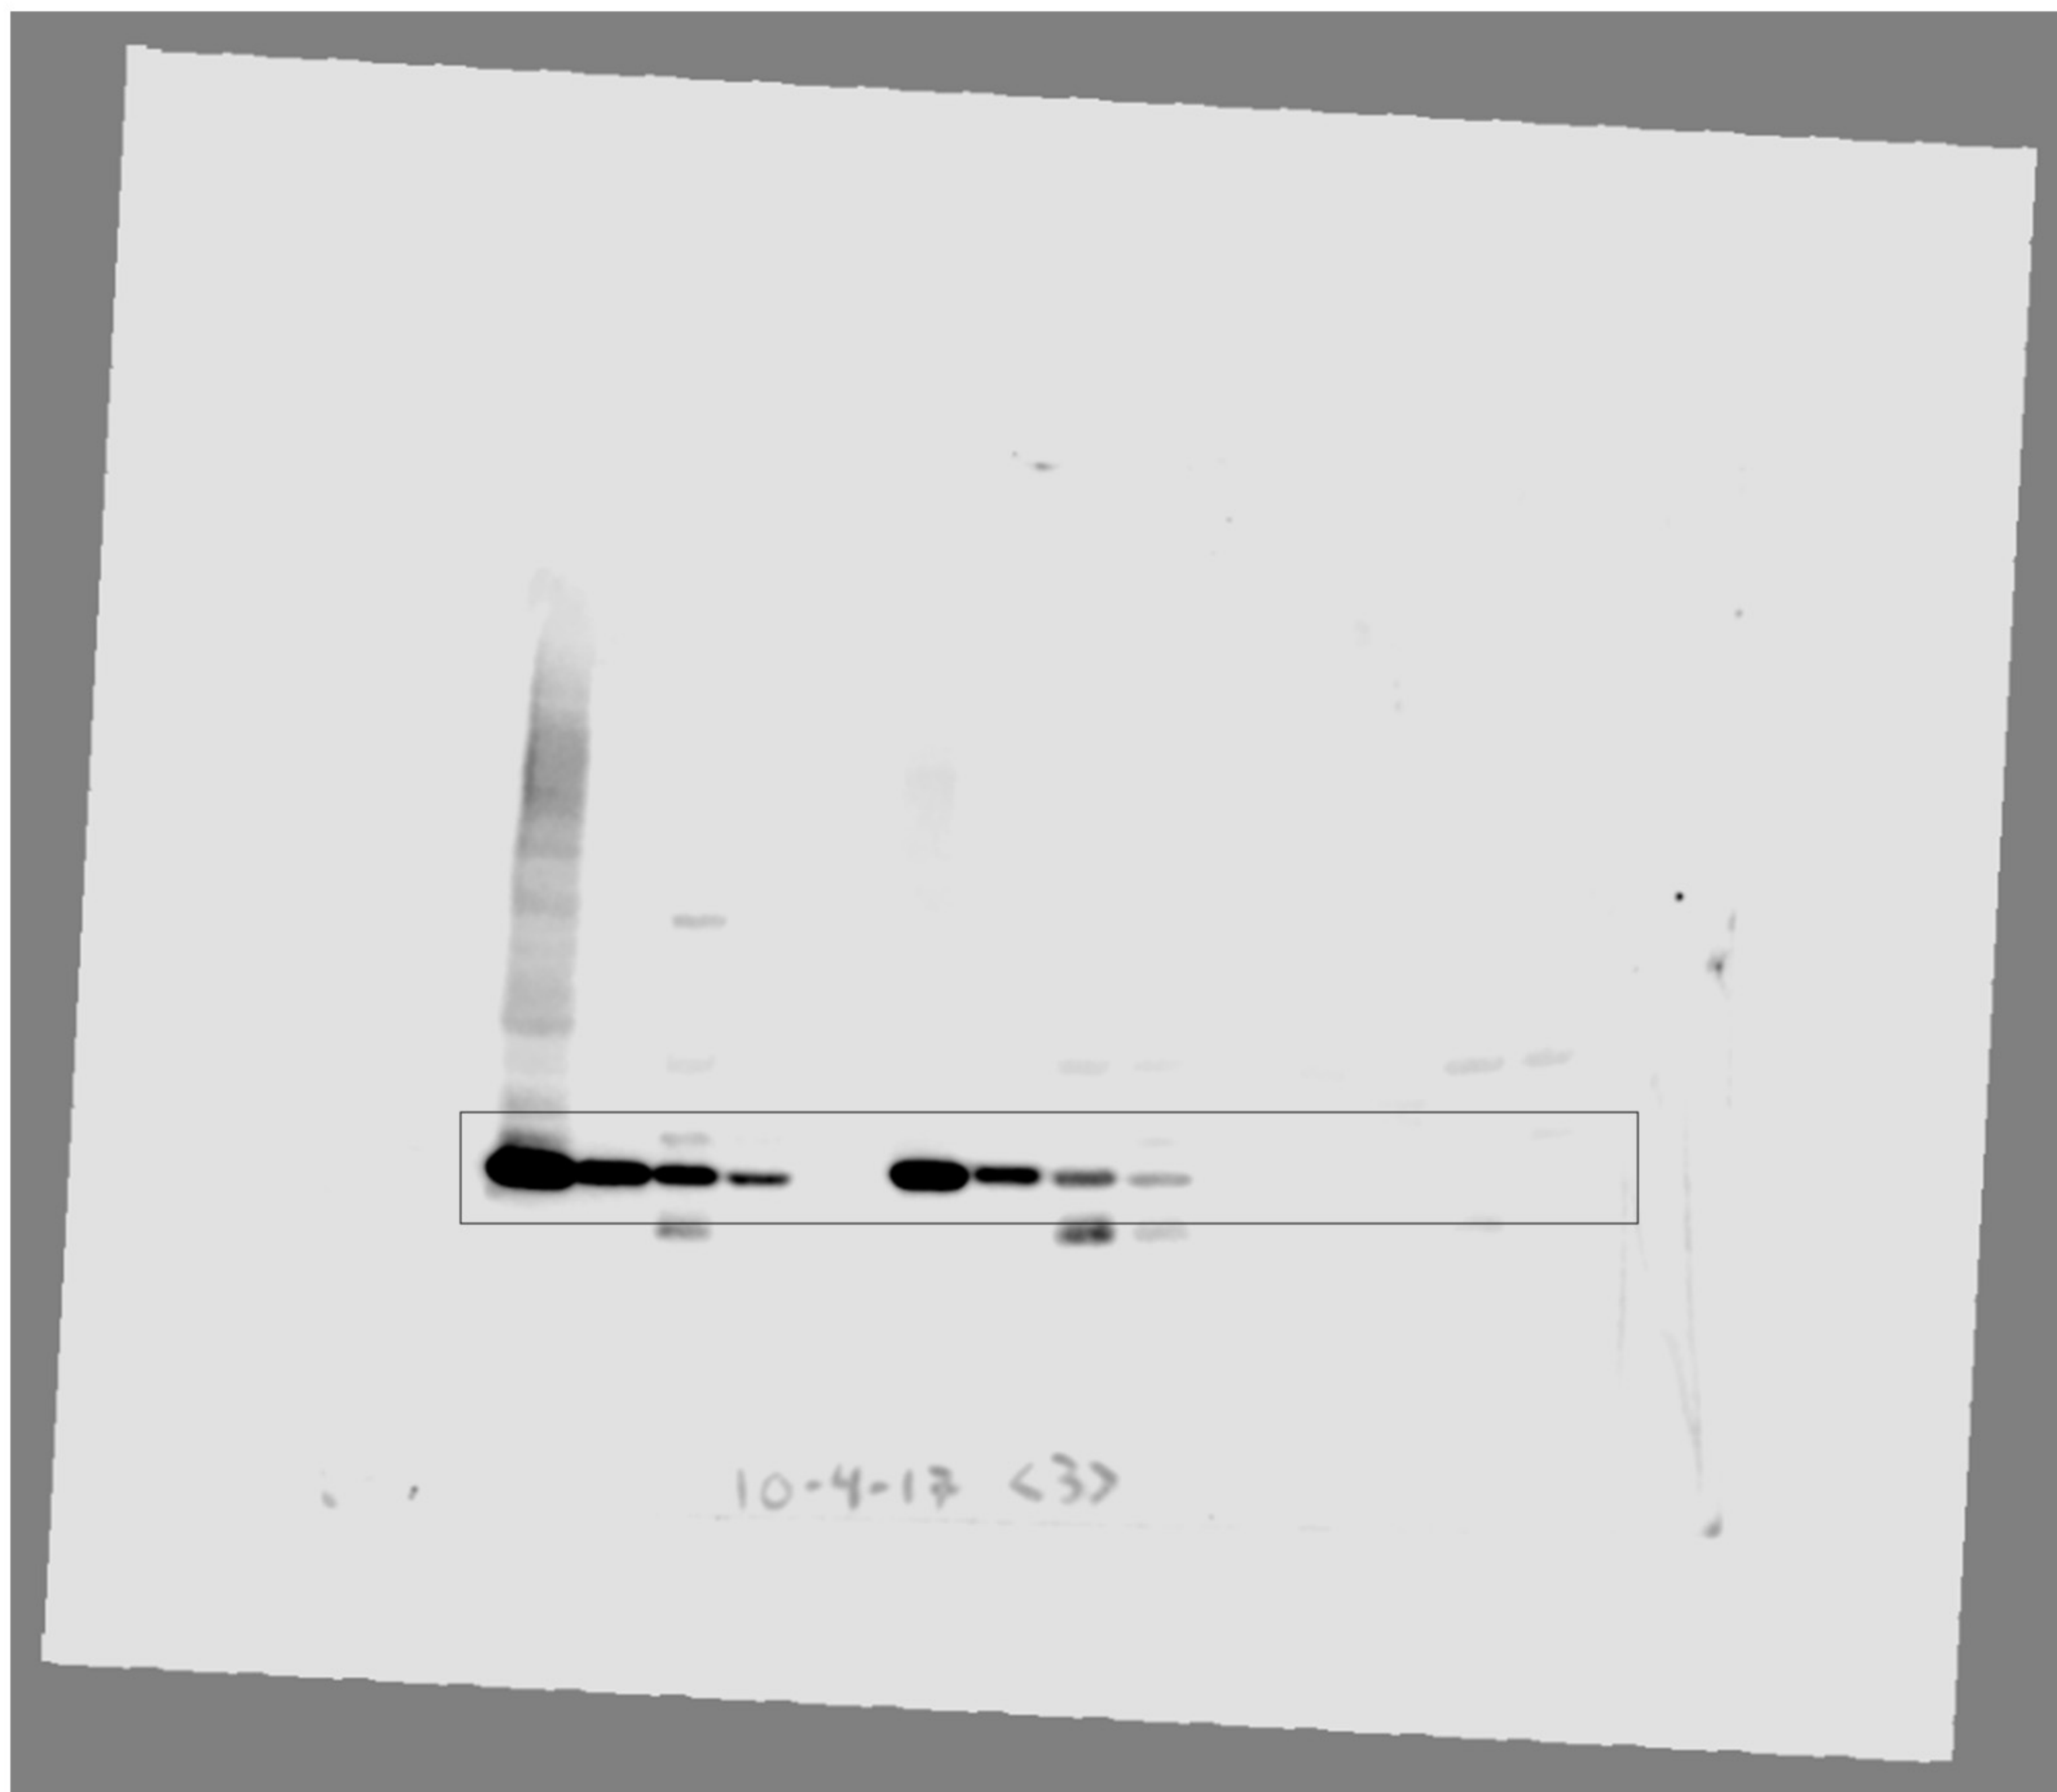

Cropped area for Figure 8A  
Ant1

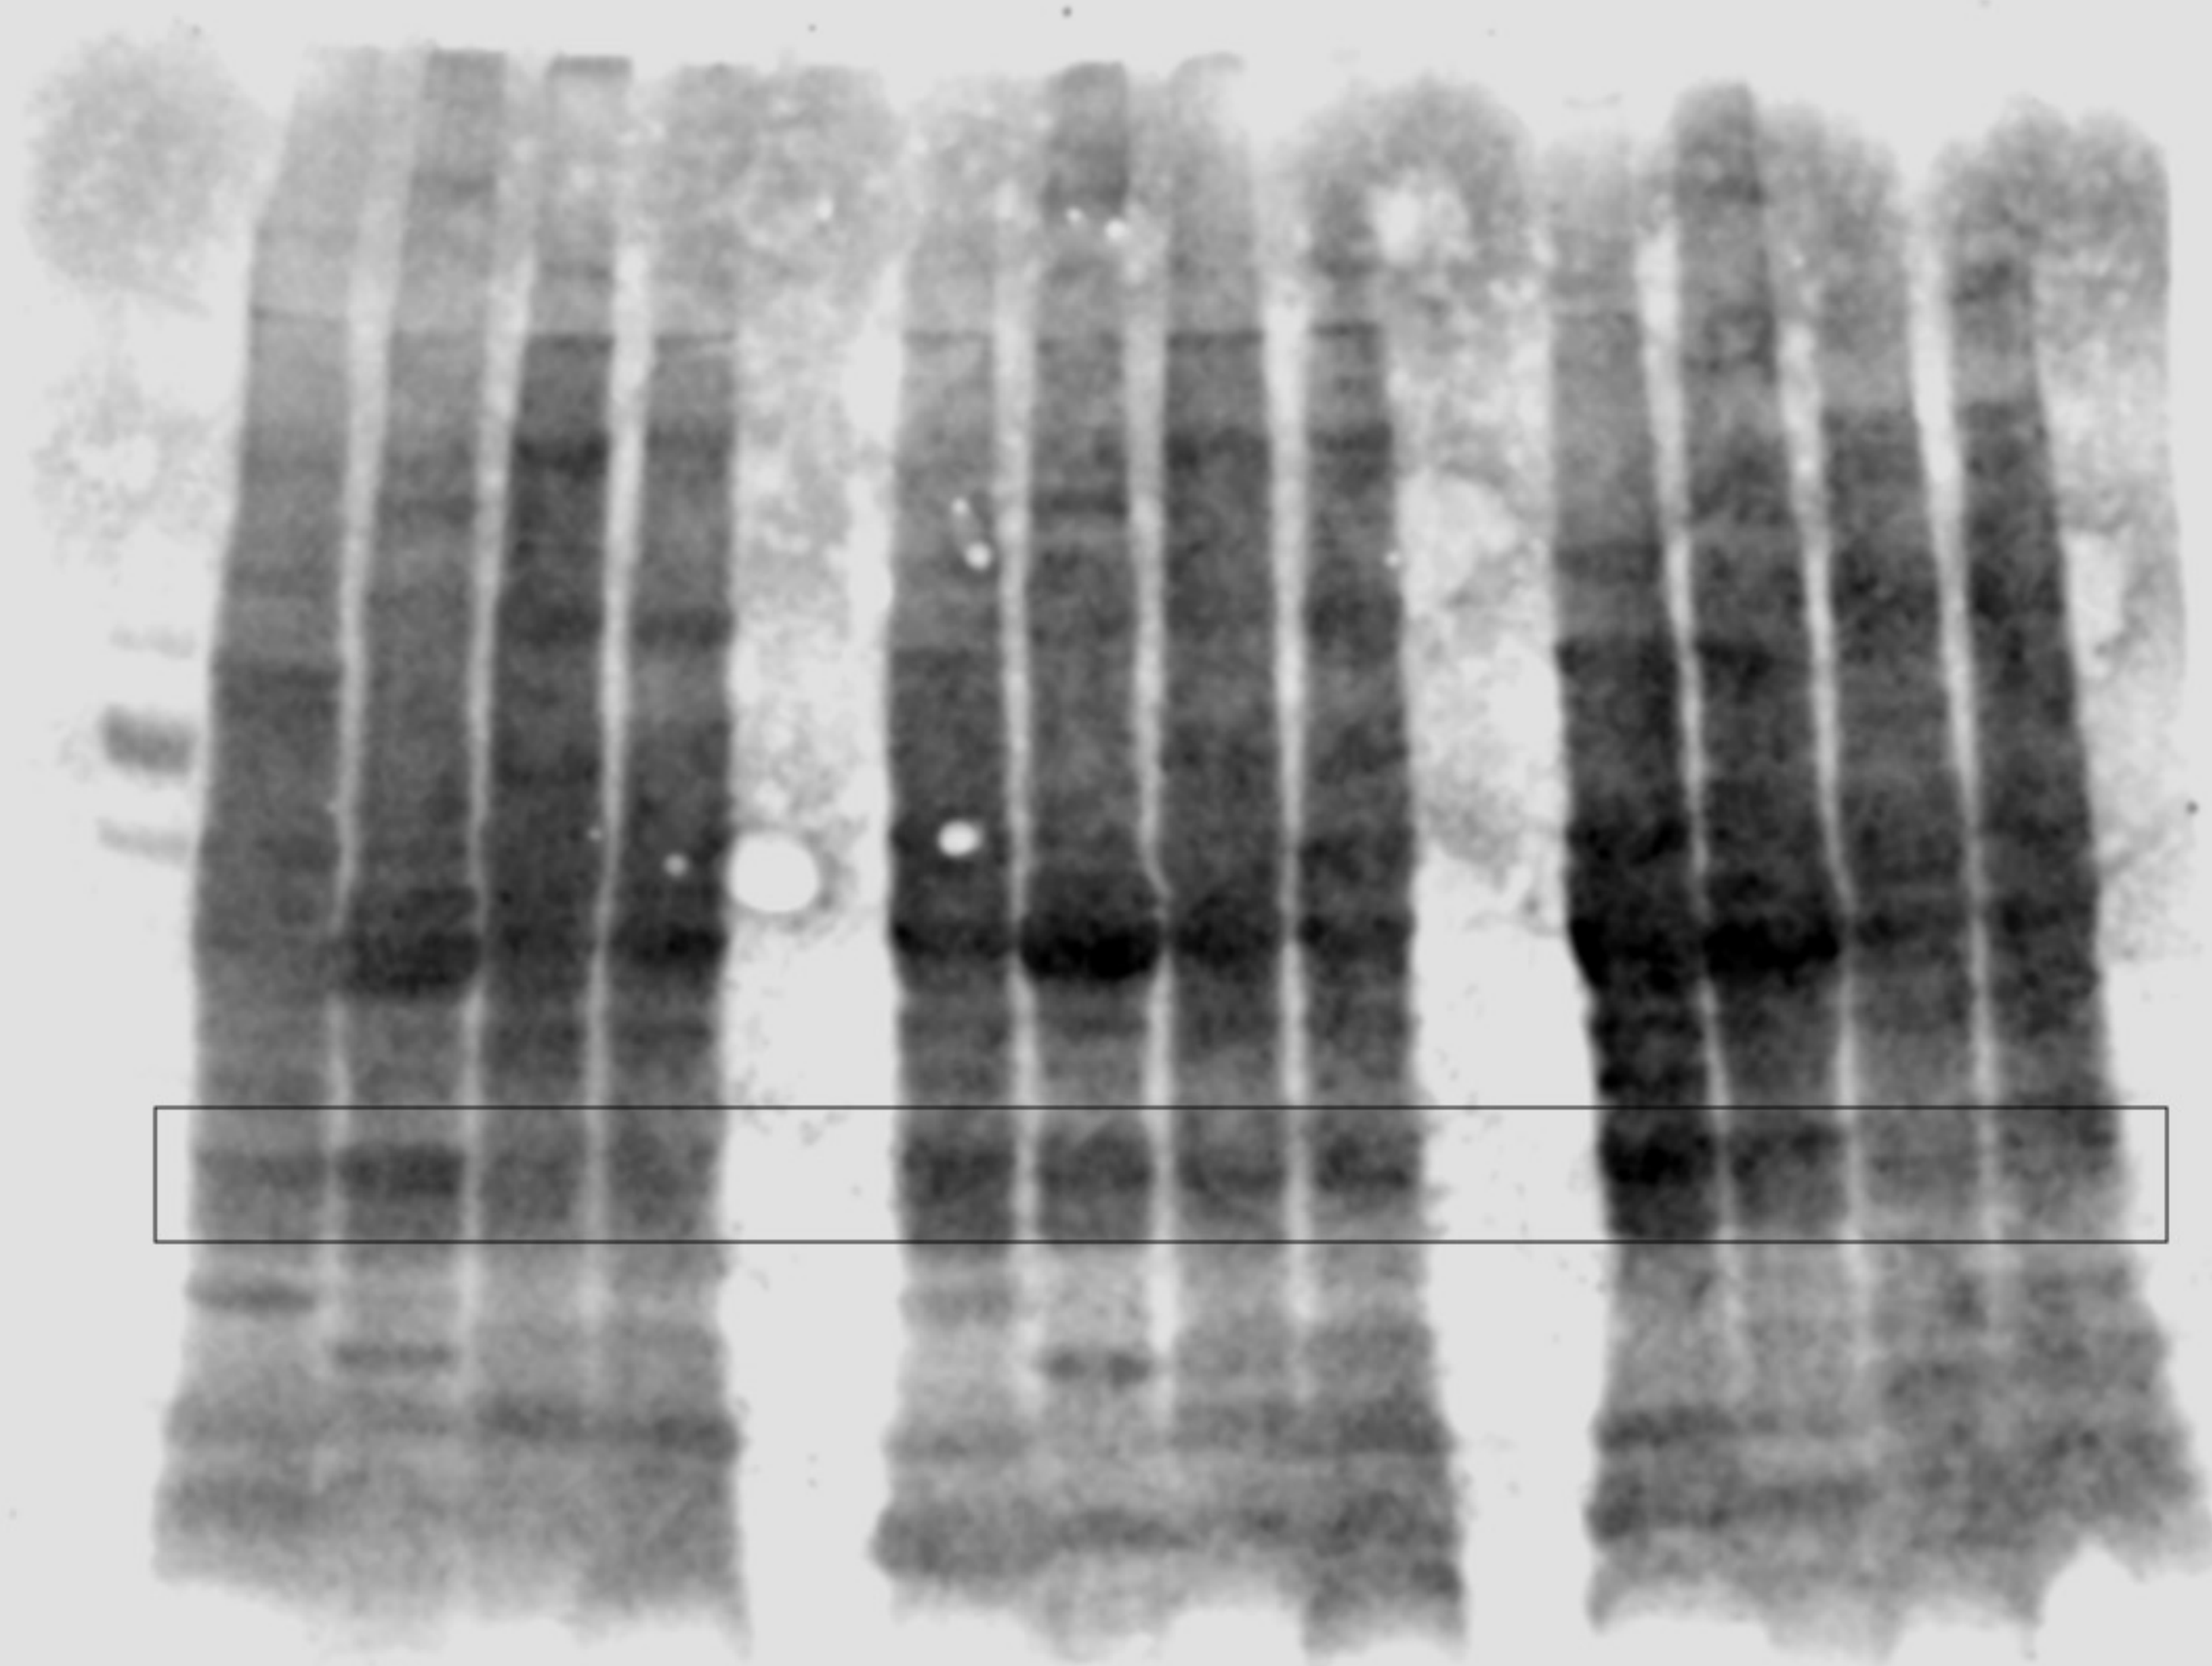

Cropped area for Figure 8A  
Total Protein Stain

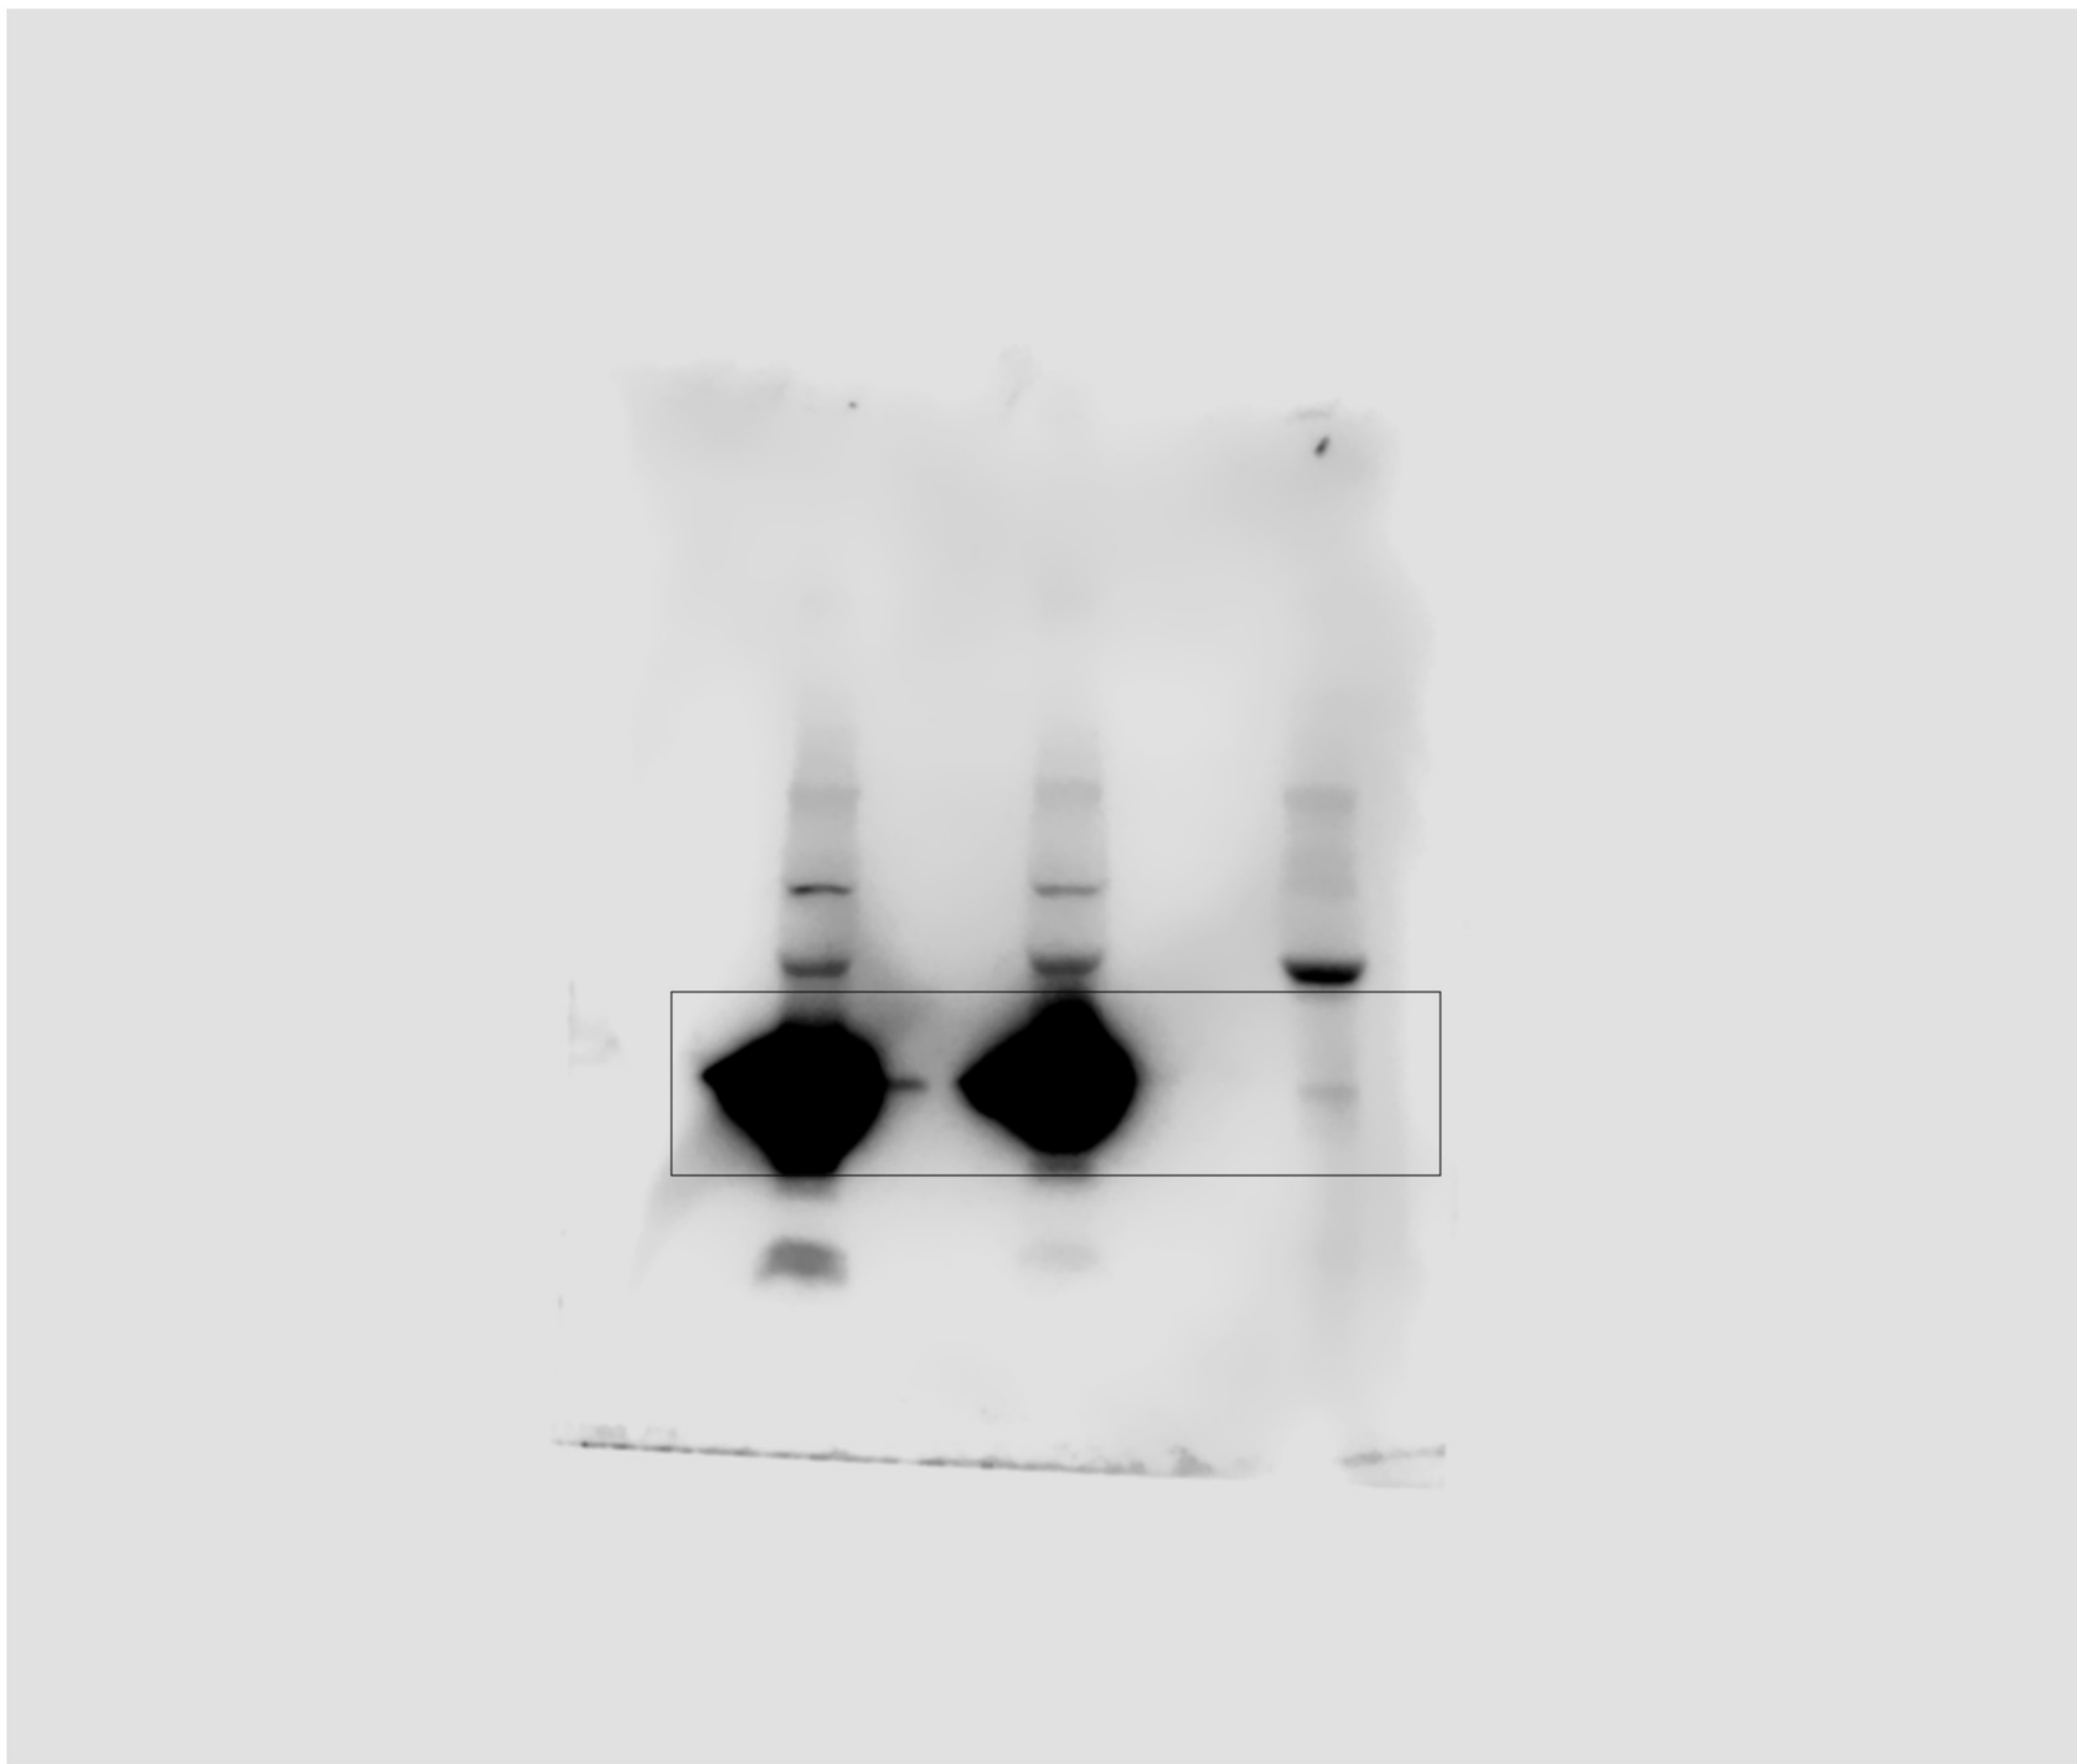

Cropped area for Figure 8B  
Ant1 long

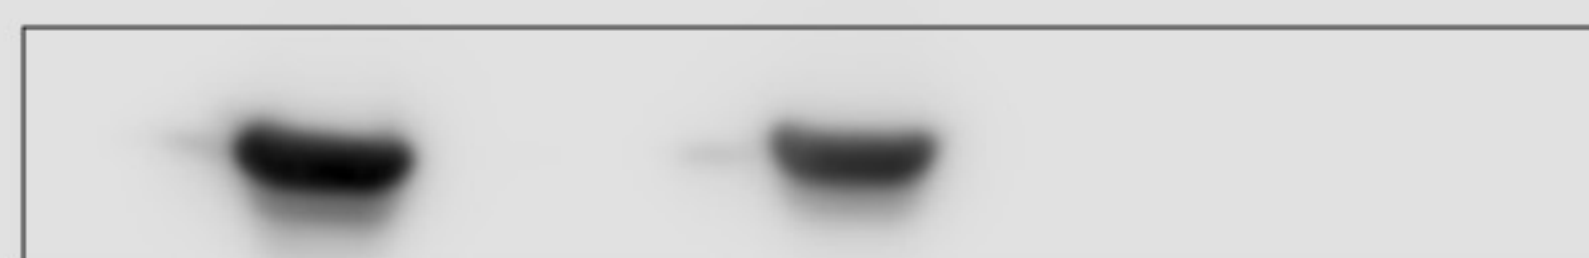

Cropped area for Figure 8B  
Ant1 short

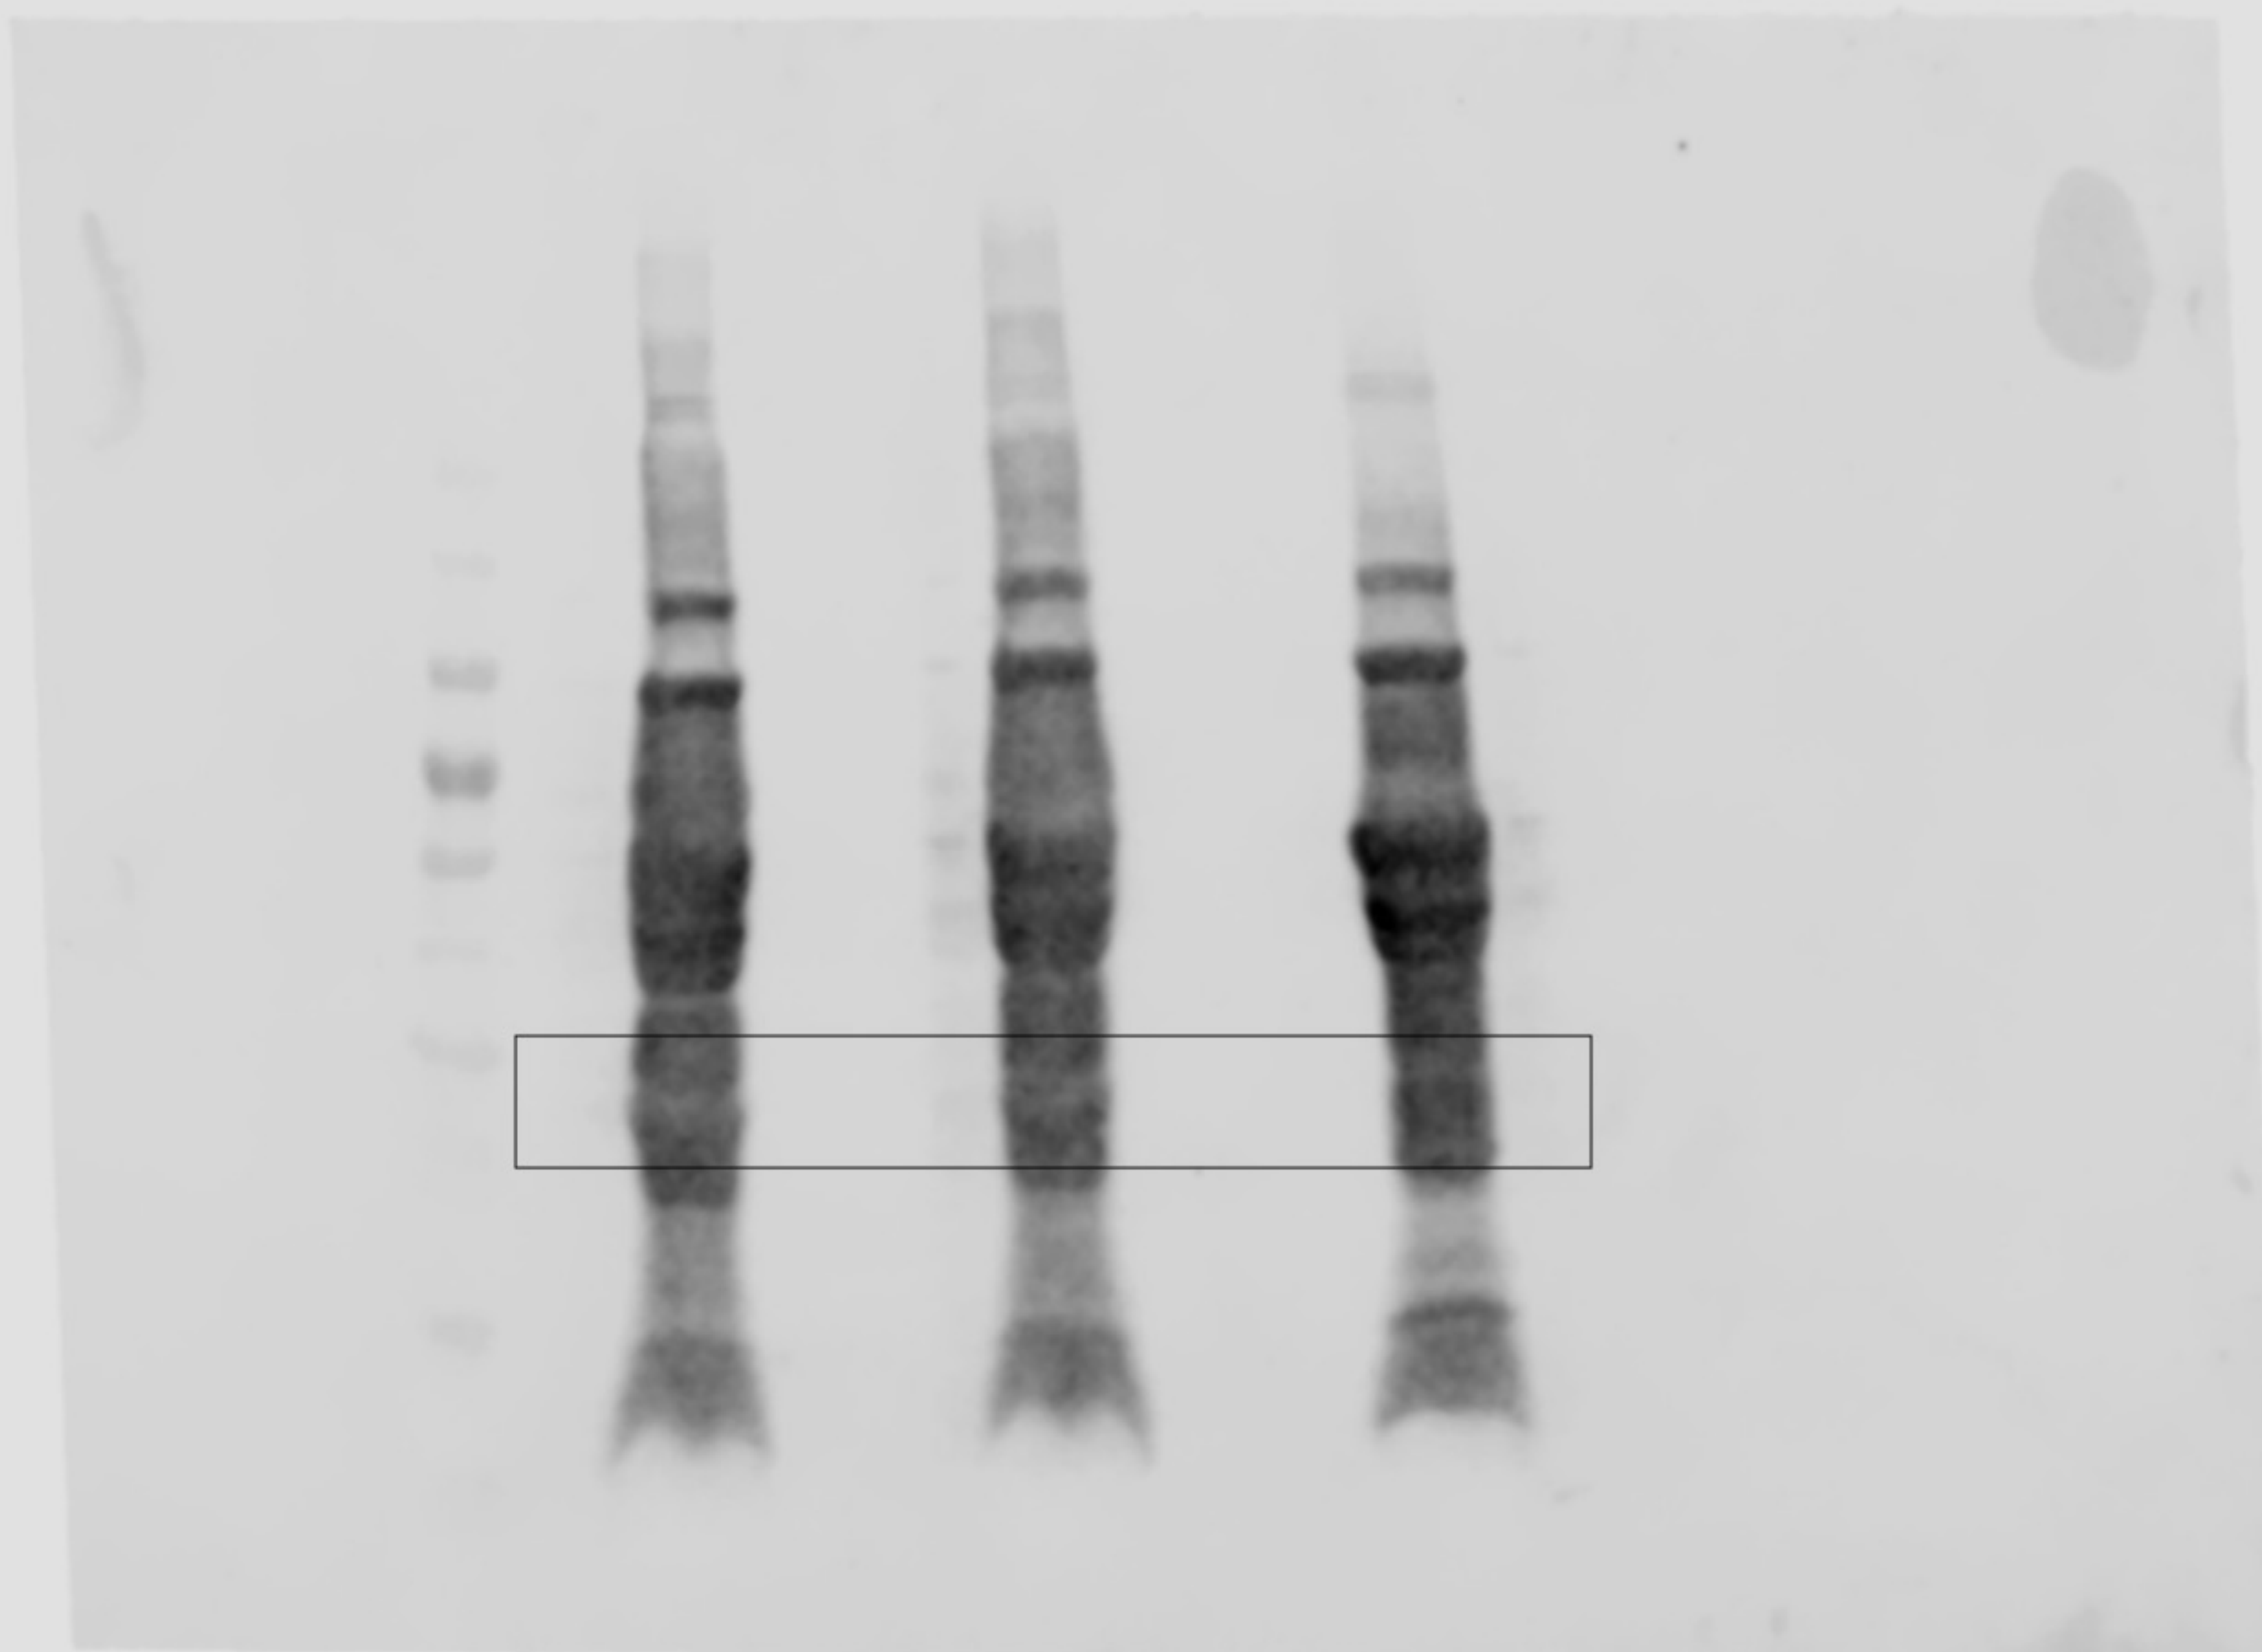

Cropped area for Figure 8B  
Total Protein Stain

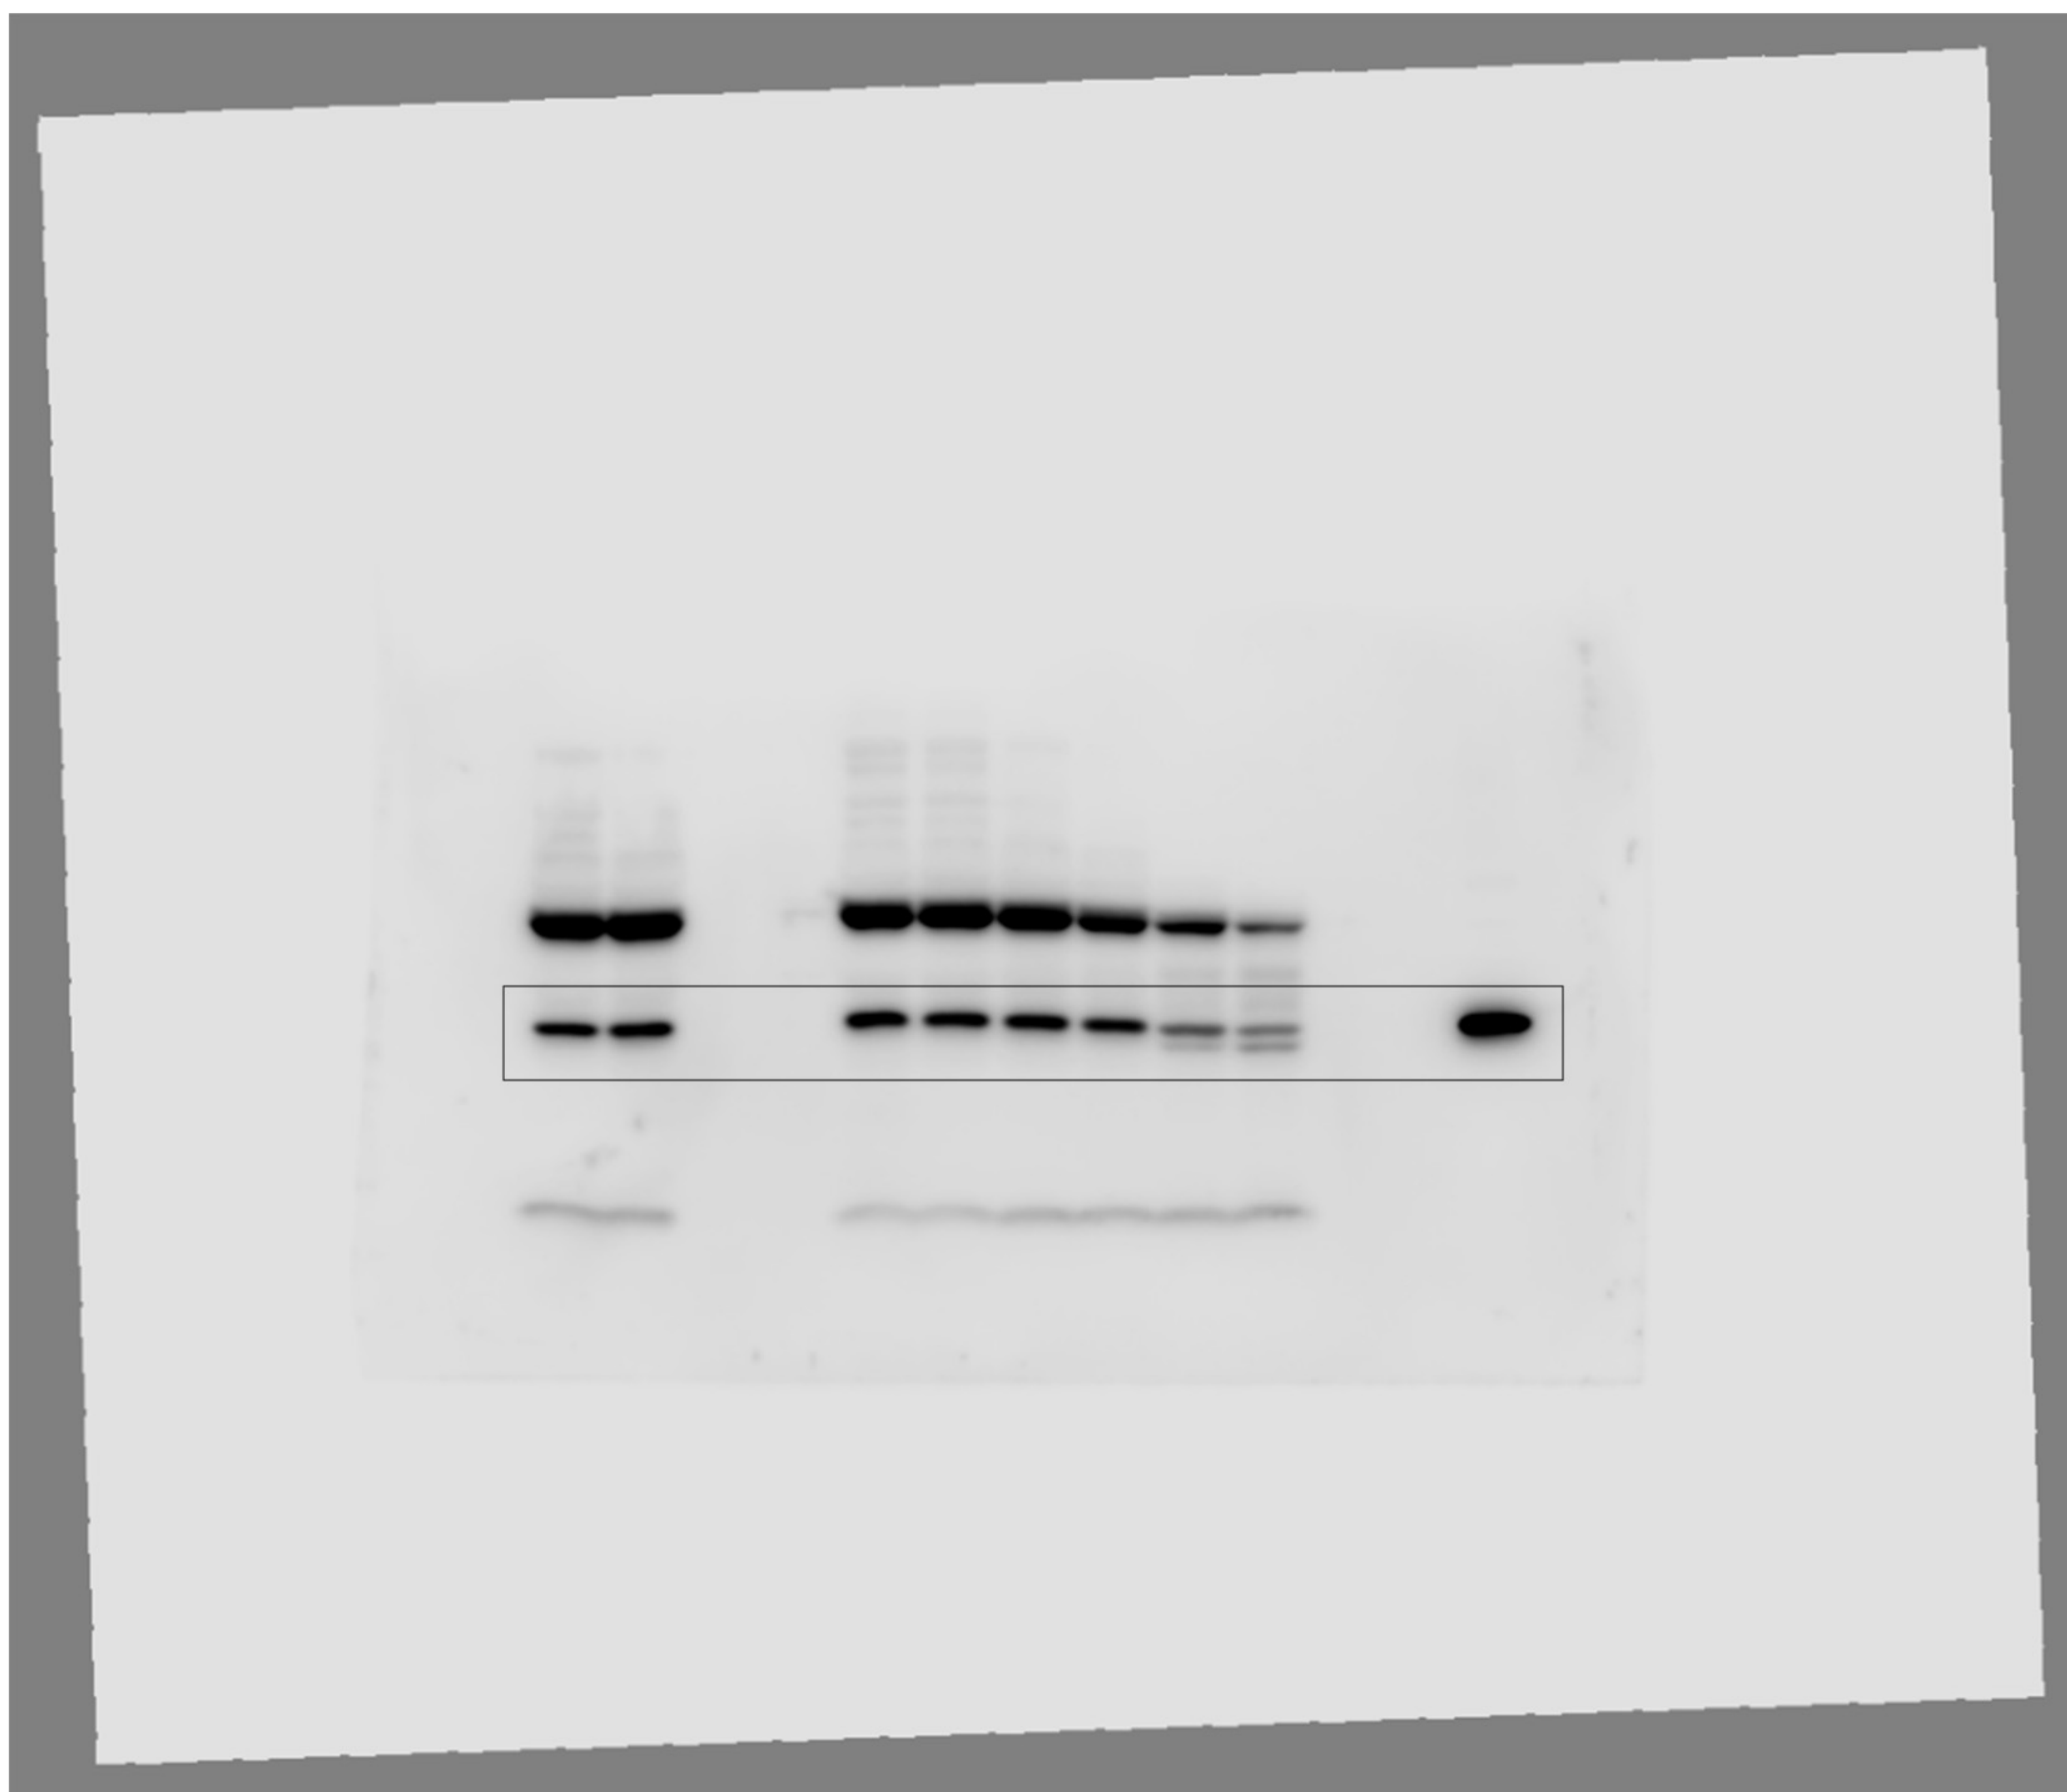

Cropped area for Figure 8D  
Ant1<sup>A114P,A123D</sup>/Ant1<sup>A114P,A123D</sup> mito, Ant1

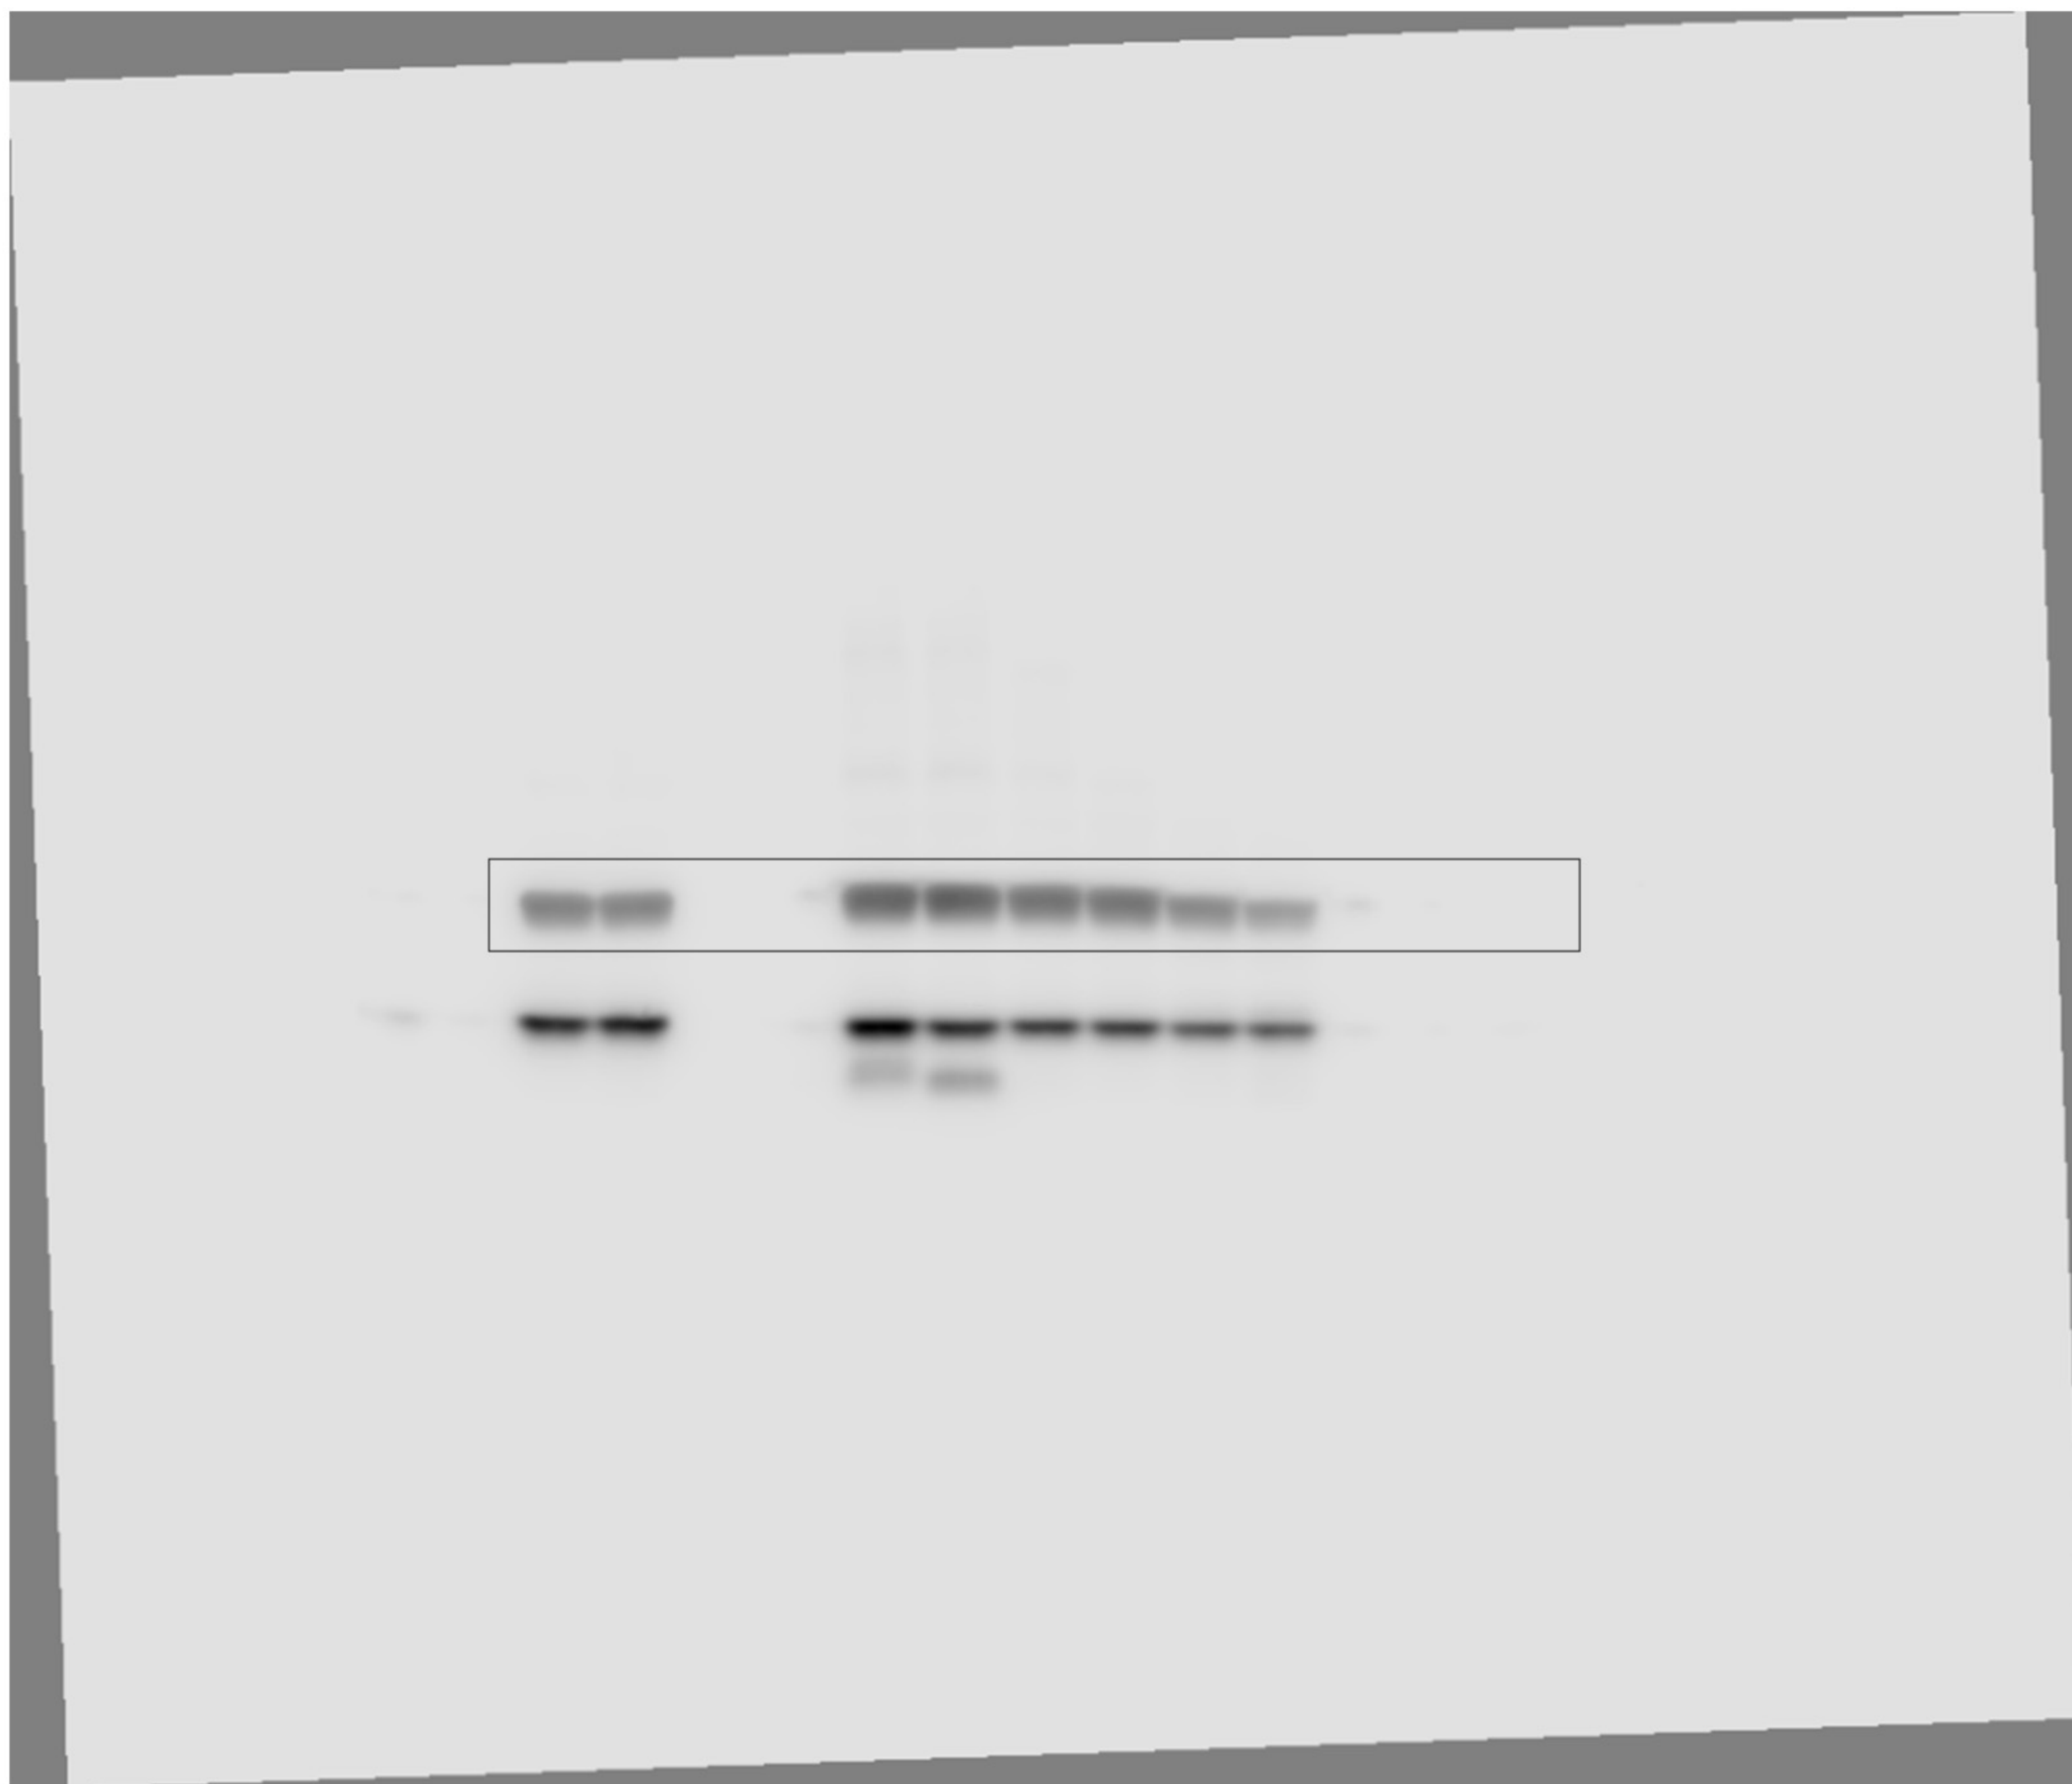

Cropped area for Figure 8D  
Ant1<sup>A114P,A123D</sup>/Ant1<sup>A114P,A123D</sup>, Mdh2

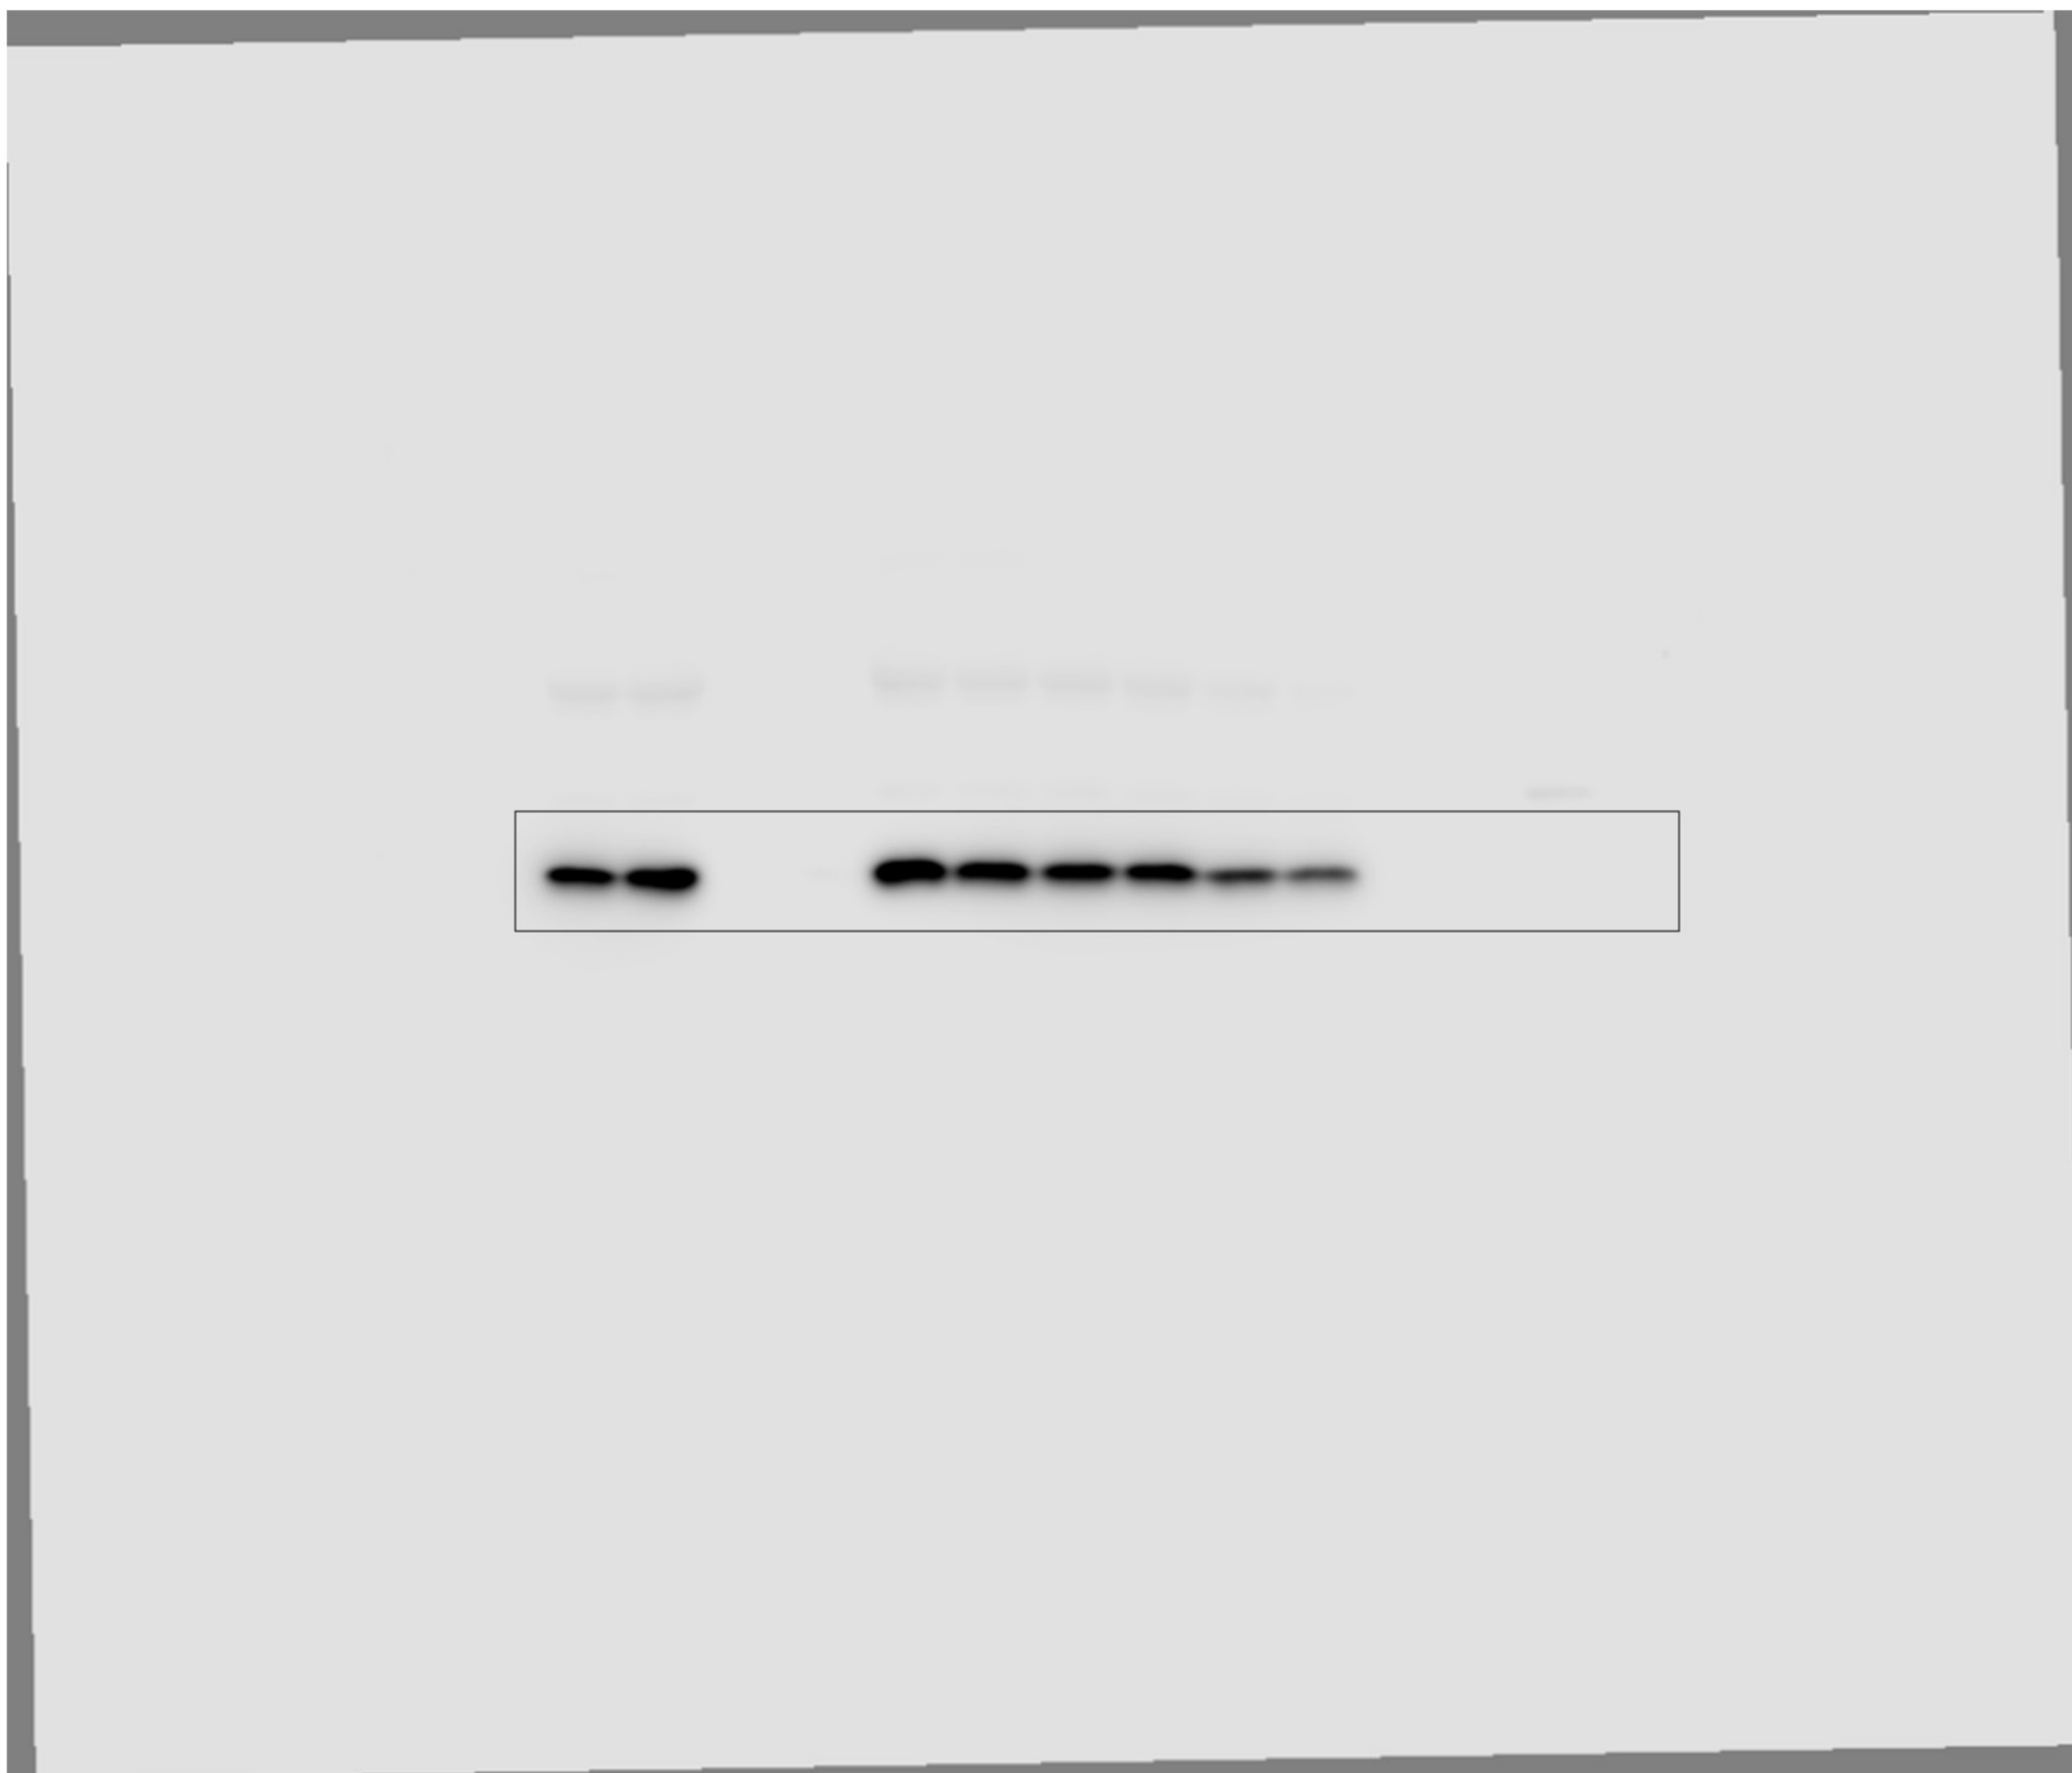

Cropped area for Figure 8D  
Ant1<sup>A114P,A123D</sup>/Ant1<sup>A114P,A123D</sup> mito, SMAC



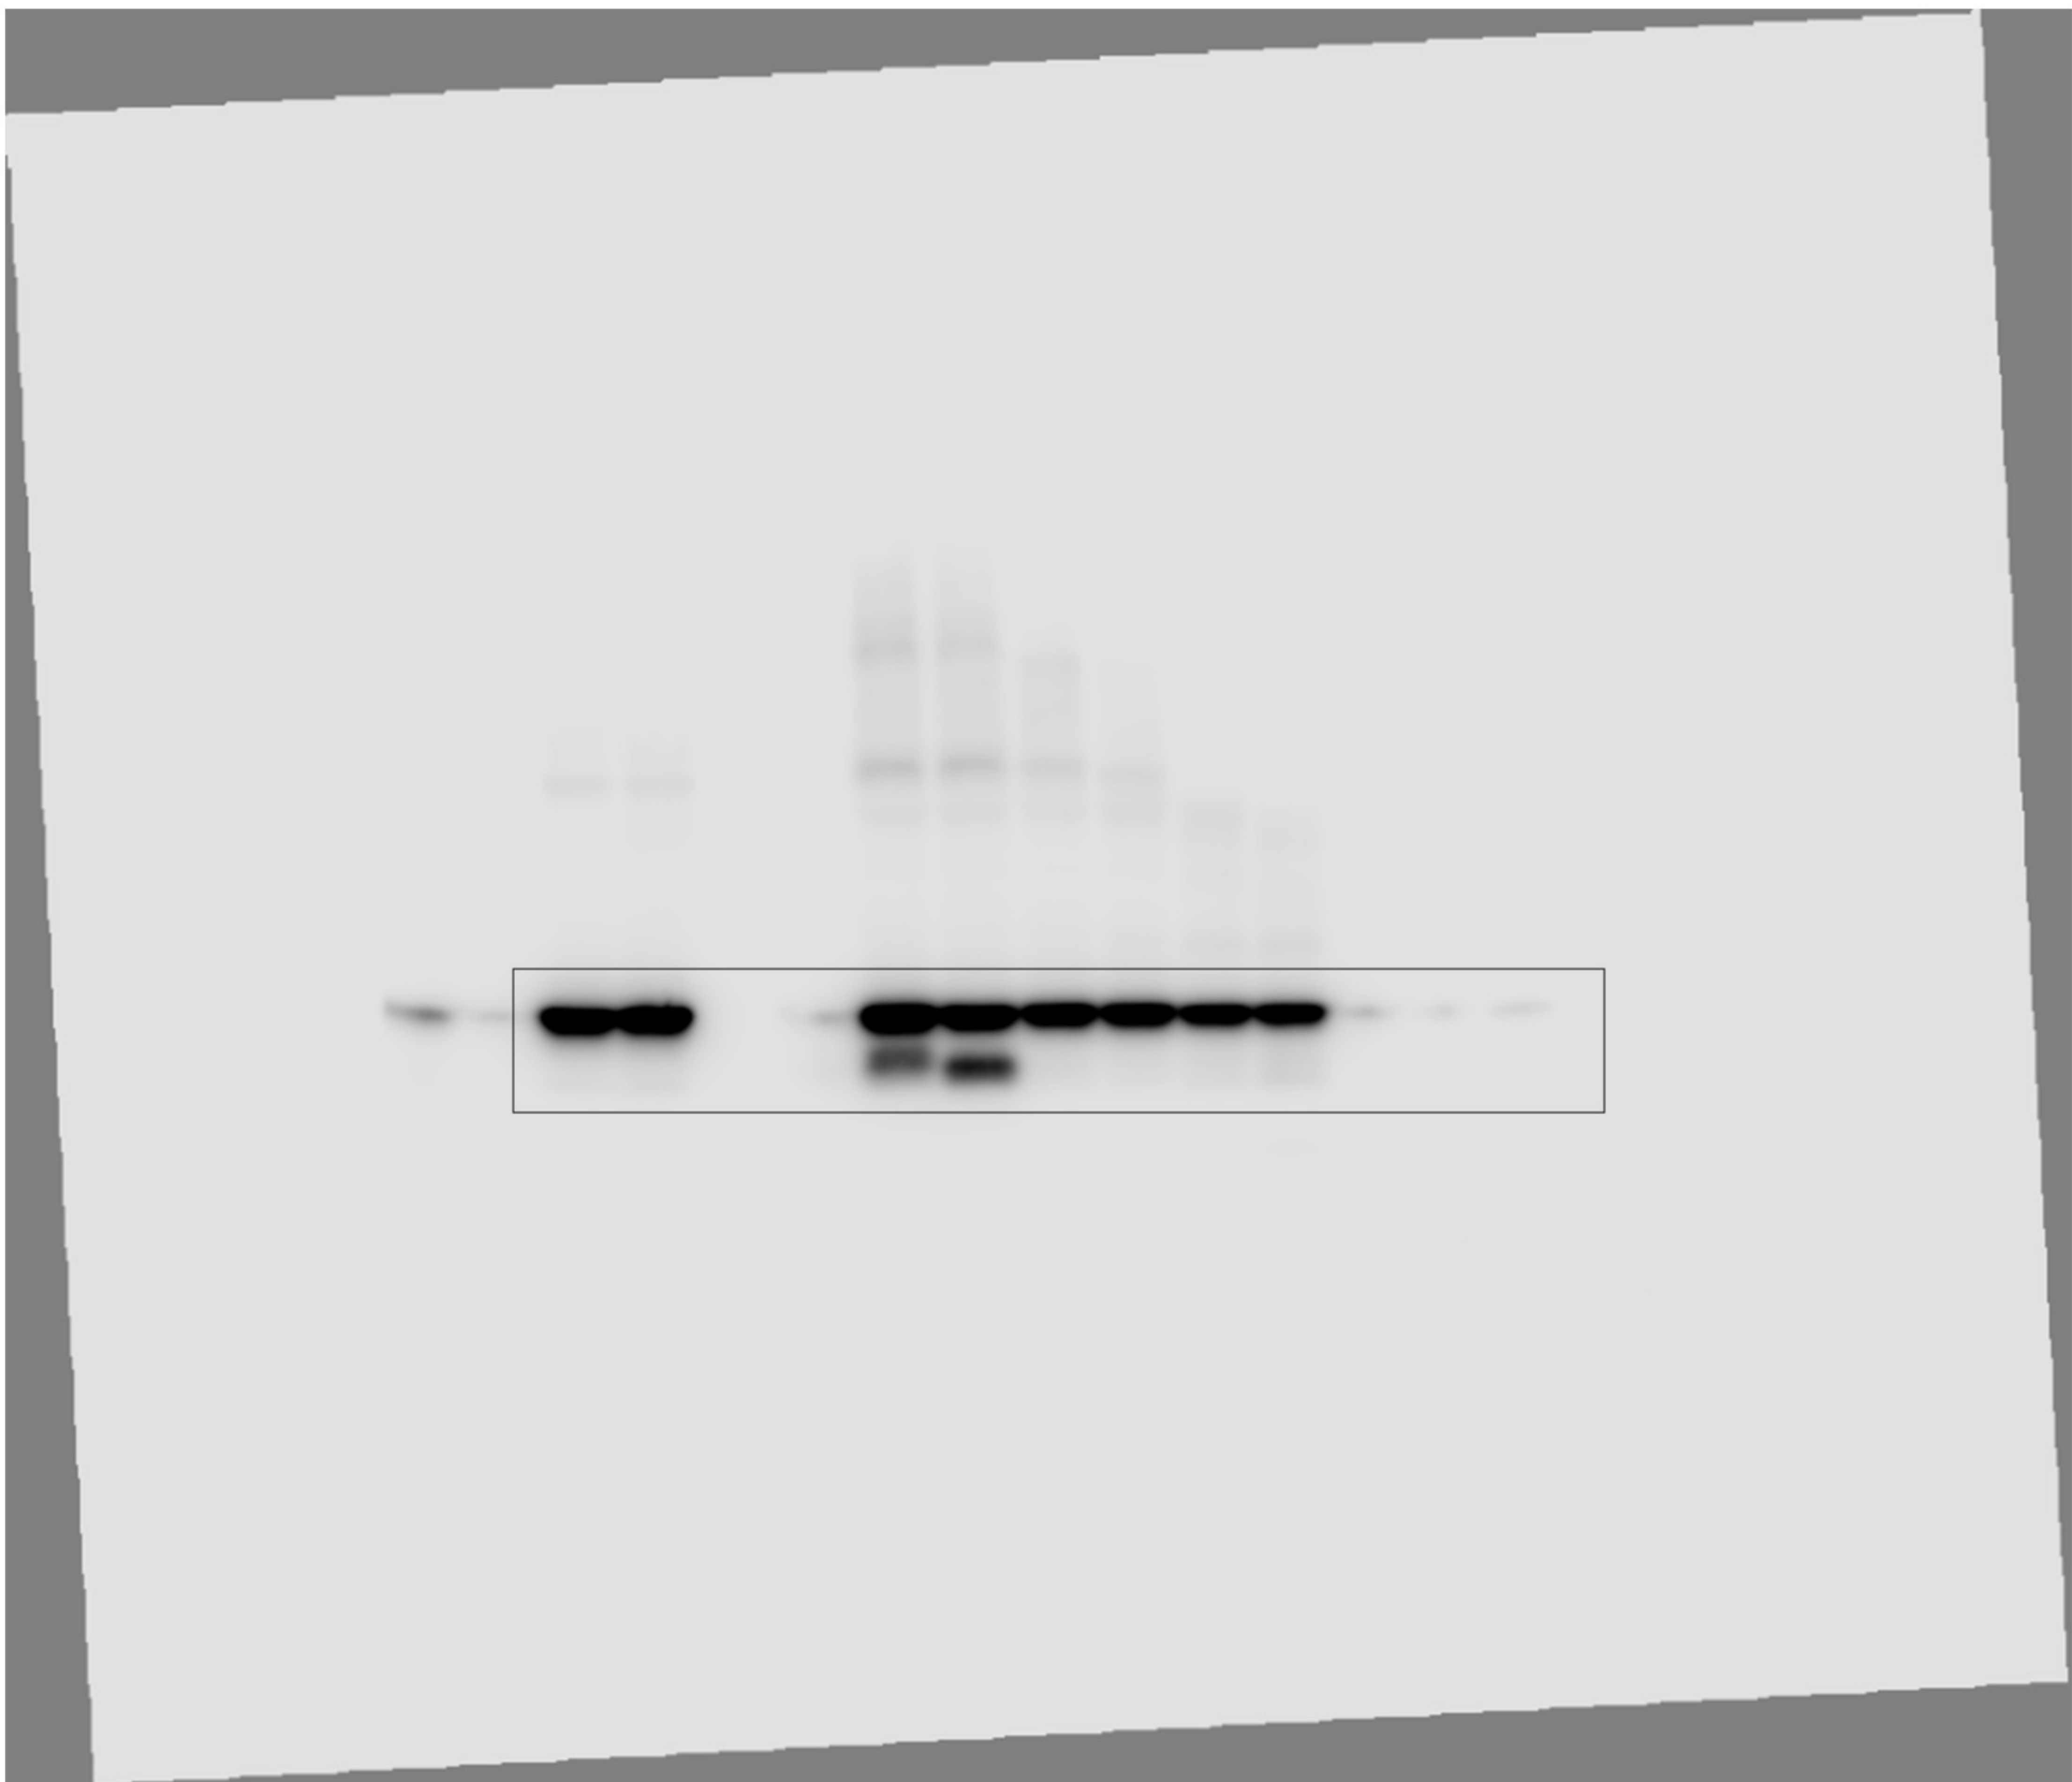

Cropped area for Figure 8D  
*Ant1*<sup>A114P,A123D</sup>/*Ant1*<sup>A114P,A123D</sup> mito, TIM23

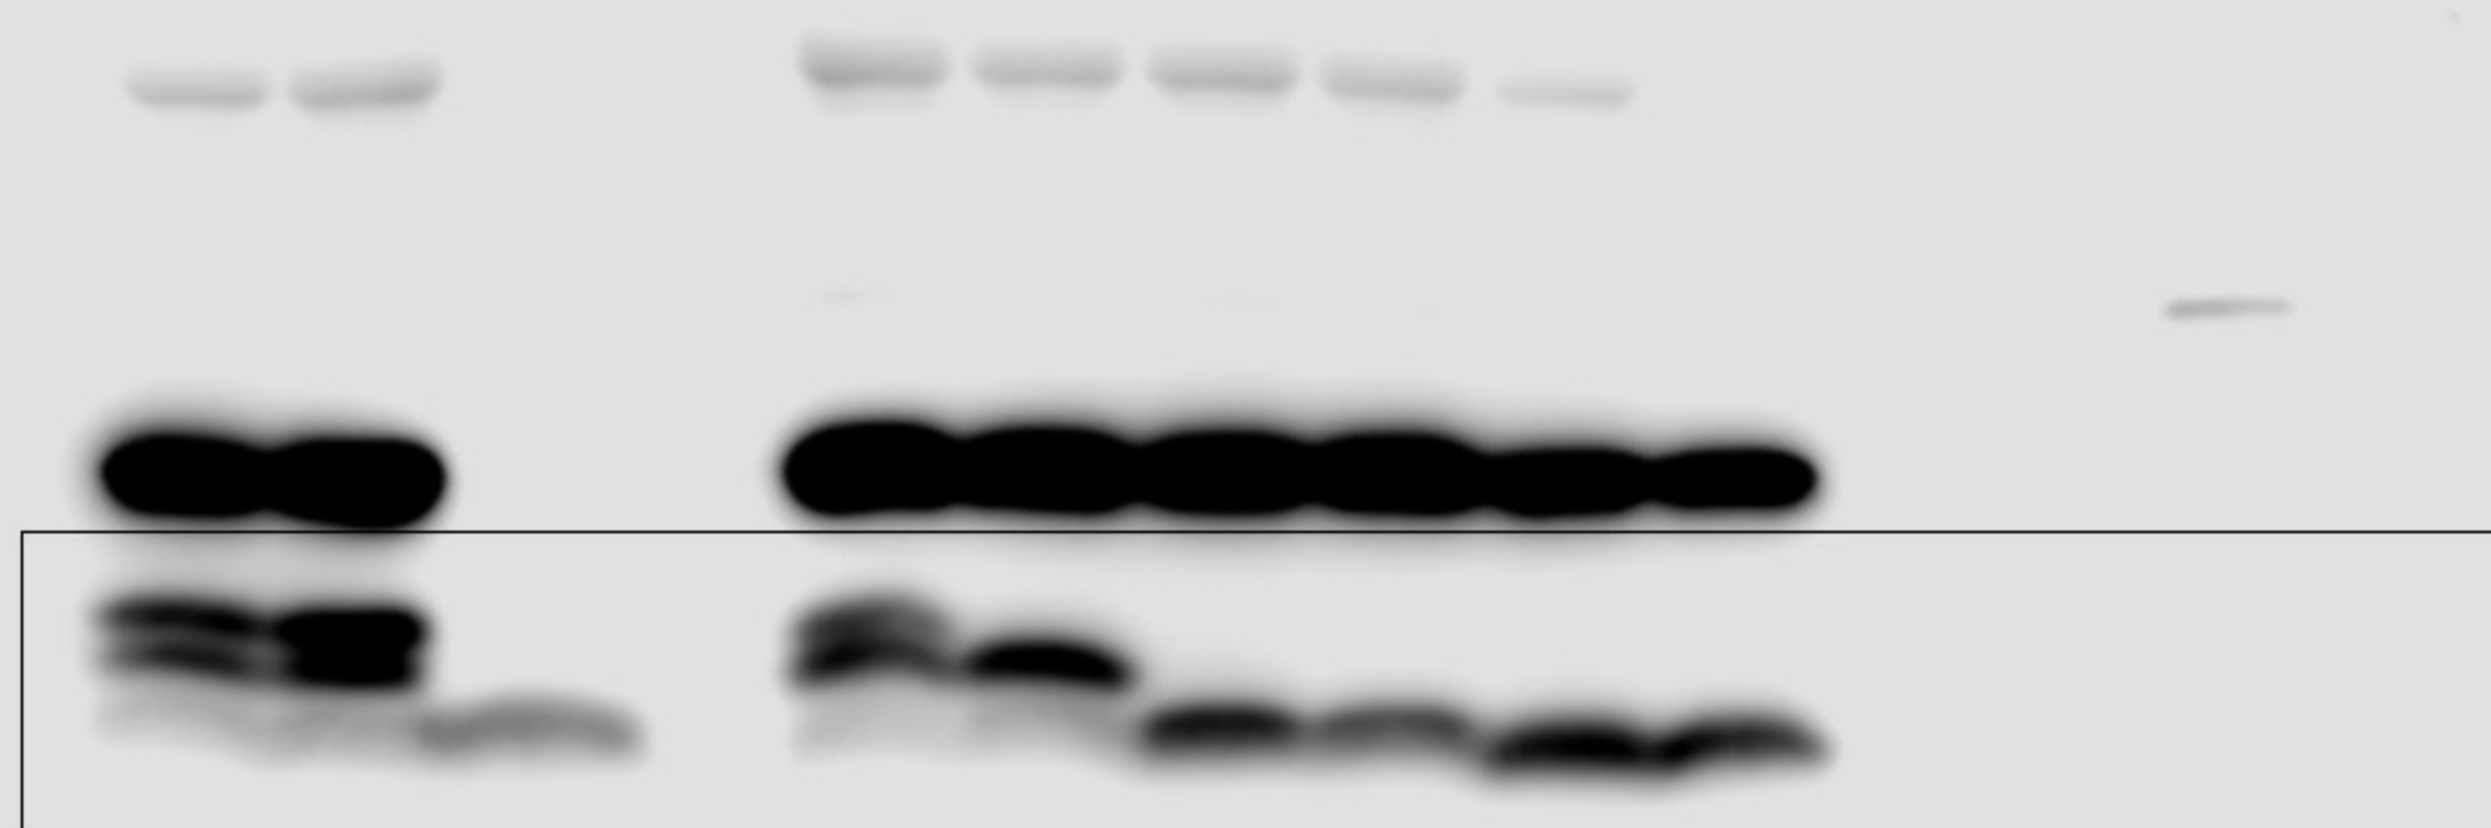

Cropped area for Figure 8D  
Ant1<sup>A114P,A123D</sup>/Ant1<sup>A114P,A123D</sup> mito, Tom20

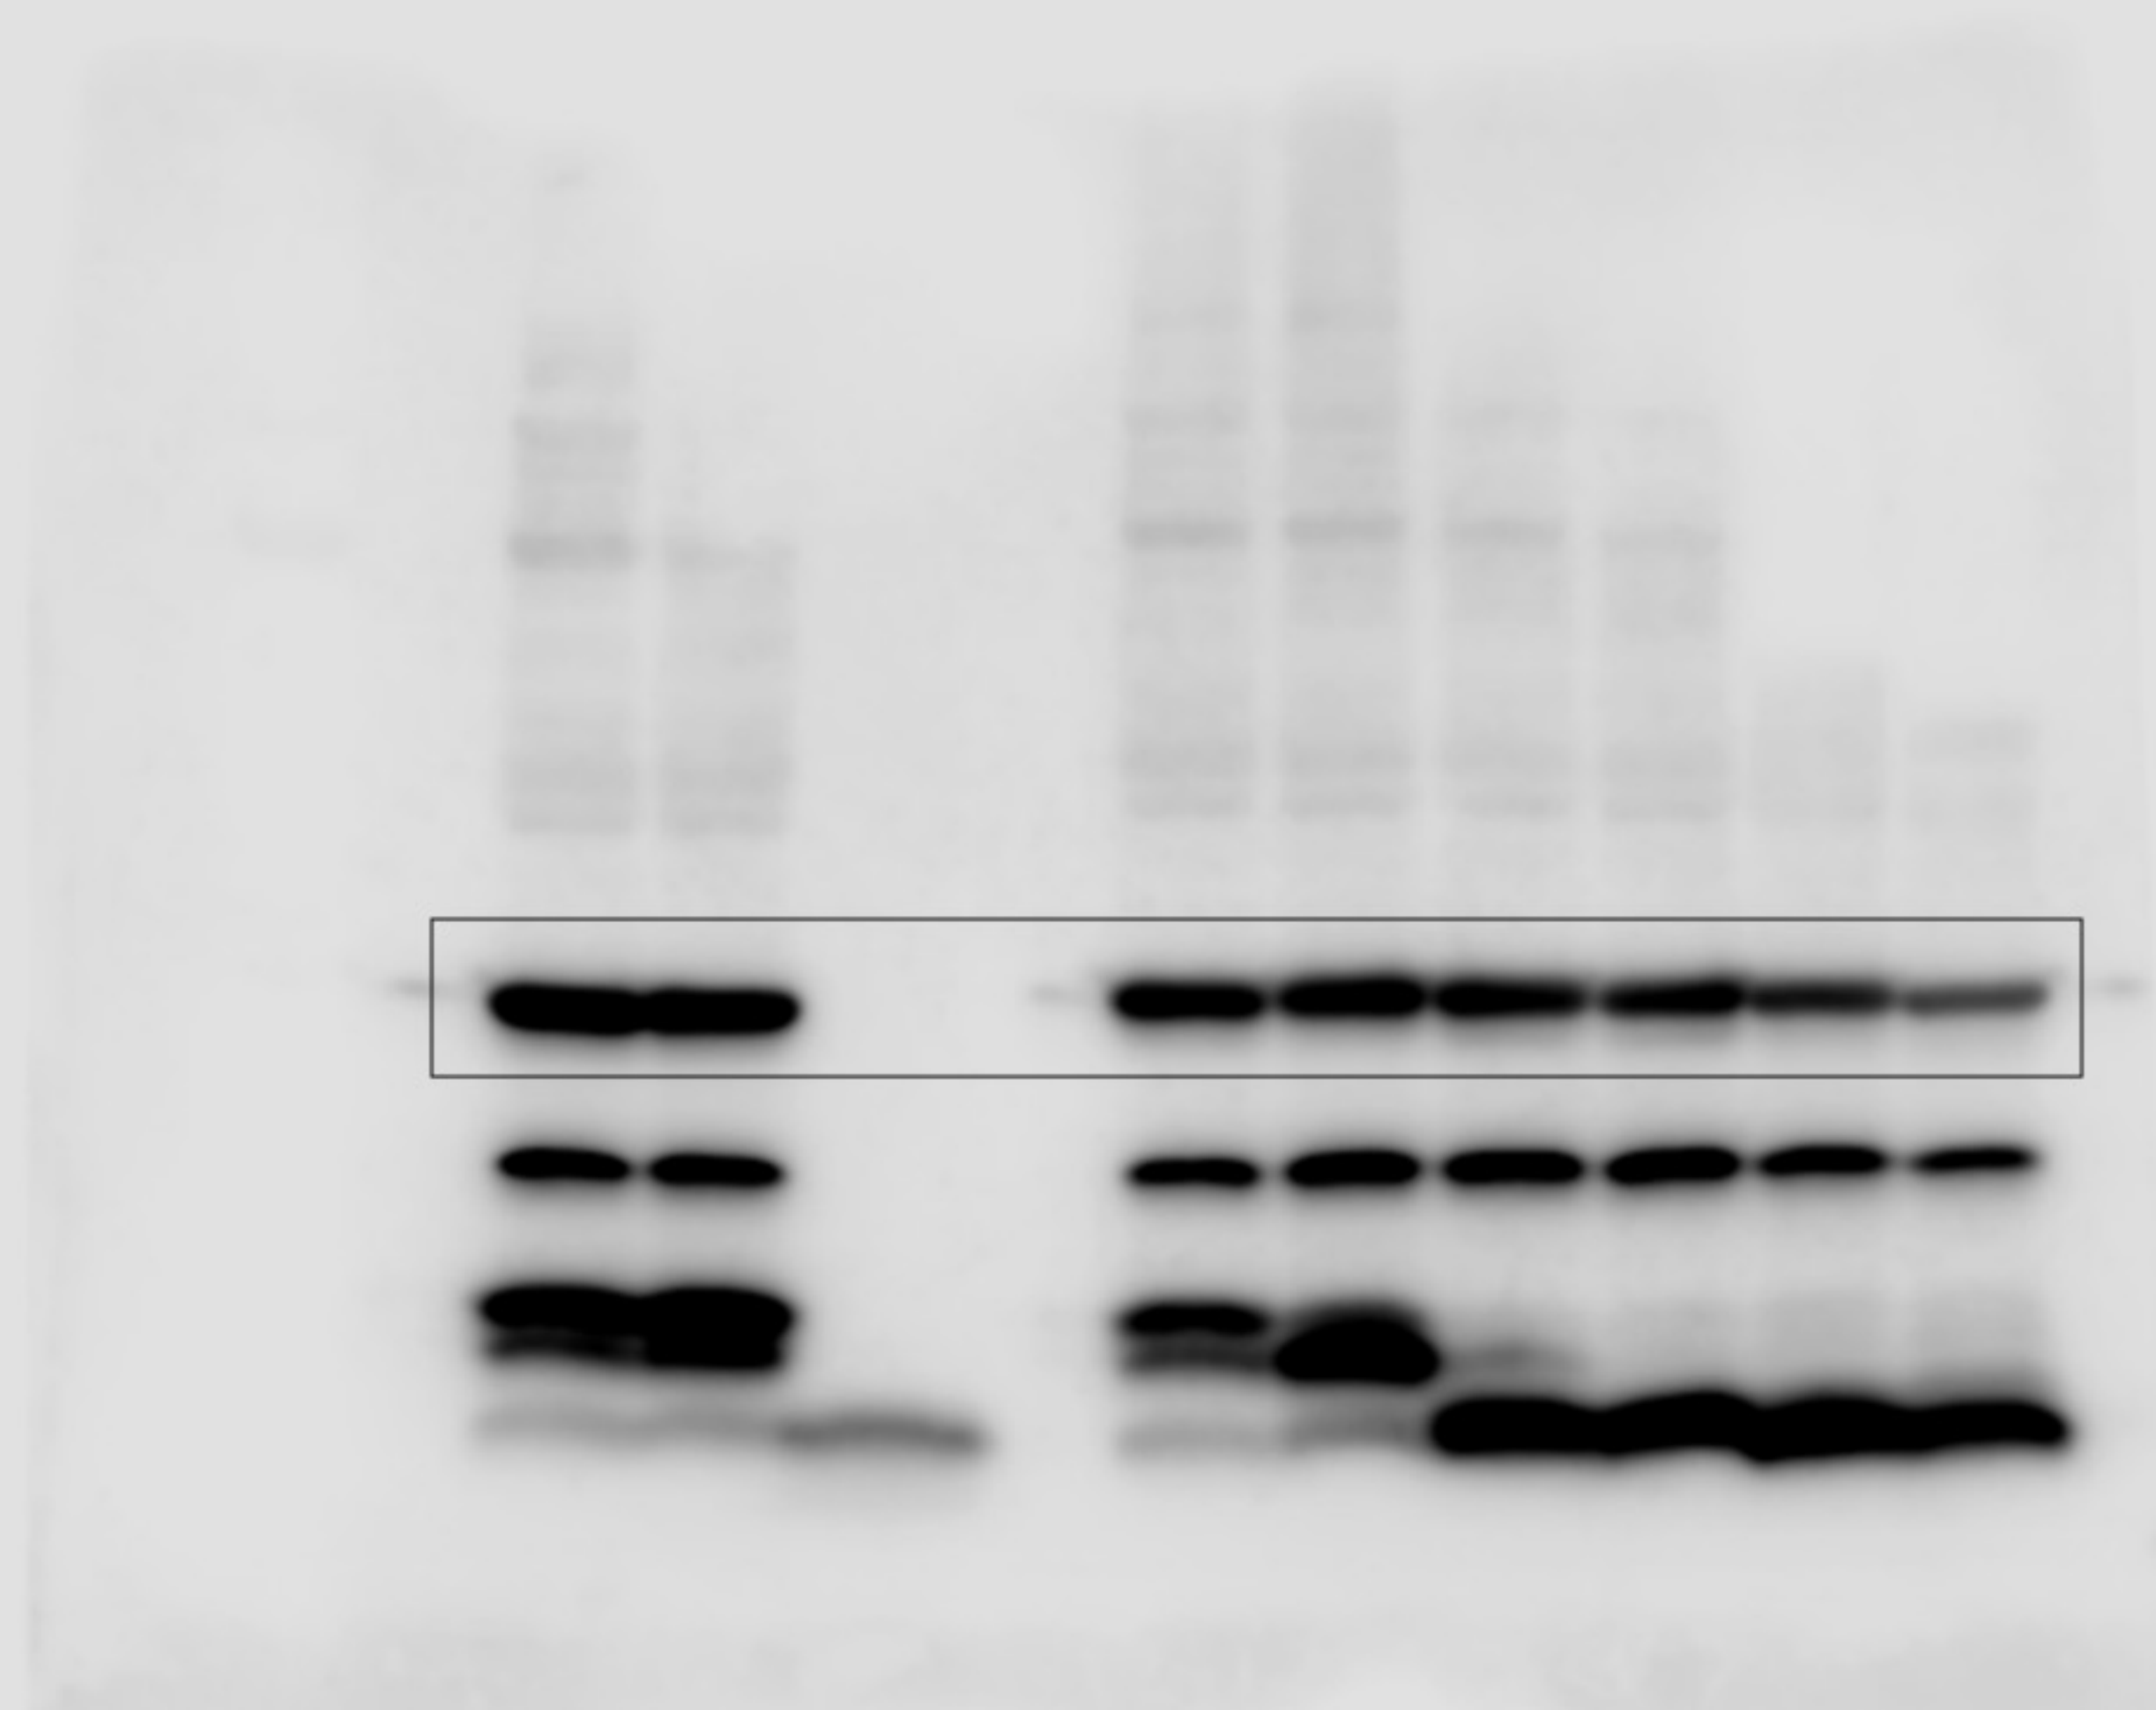

Cropped area for Figure 8D  
Wild-type mito, Ant1

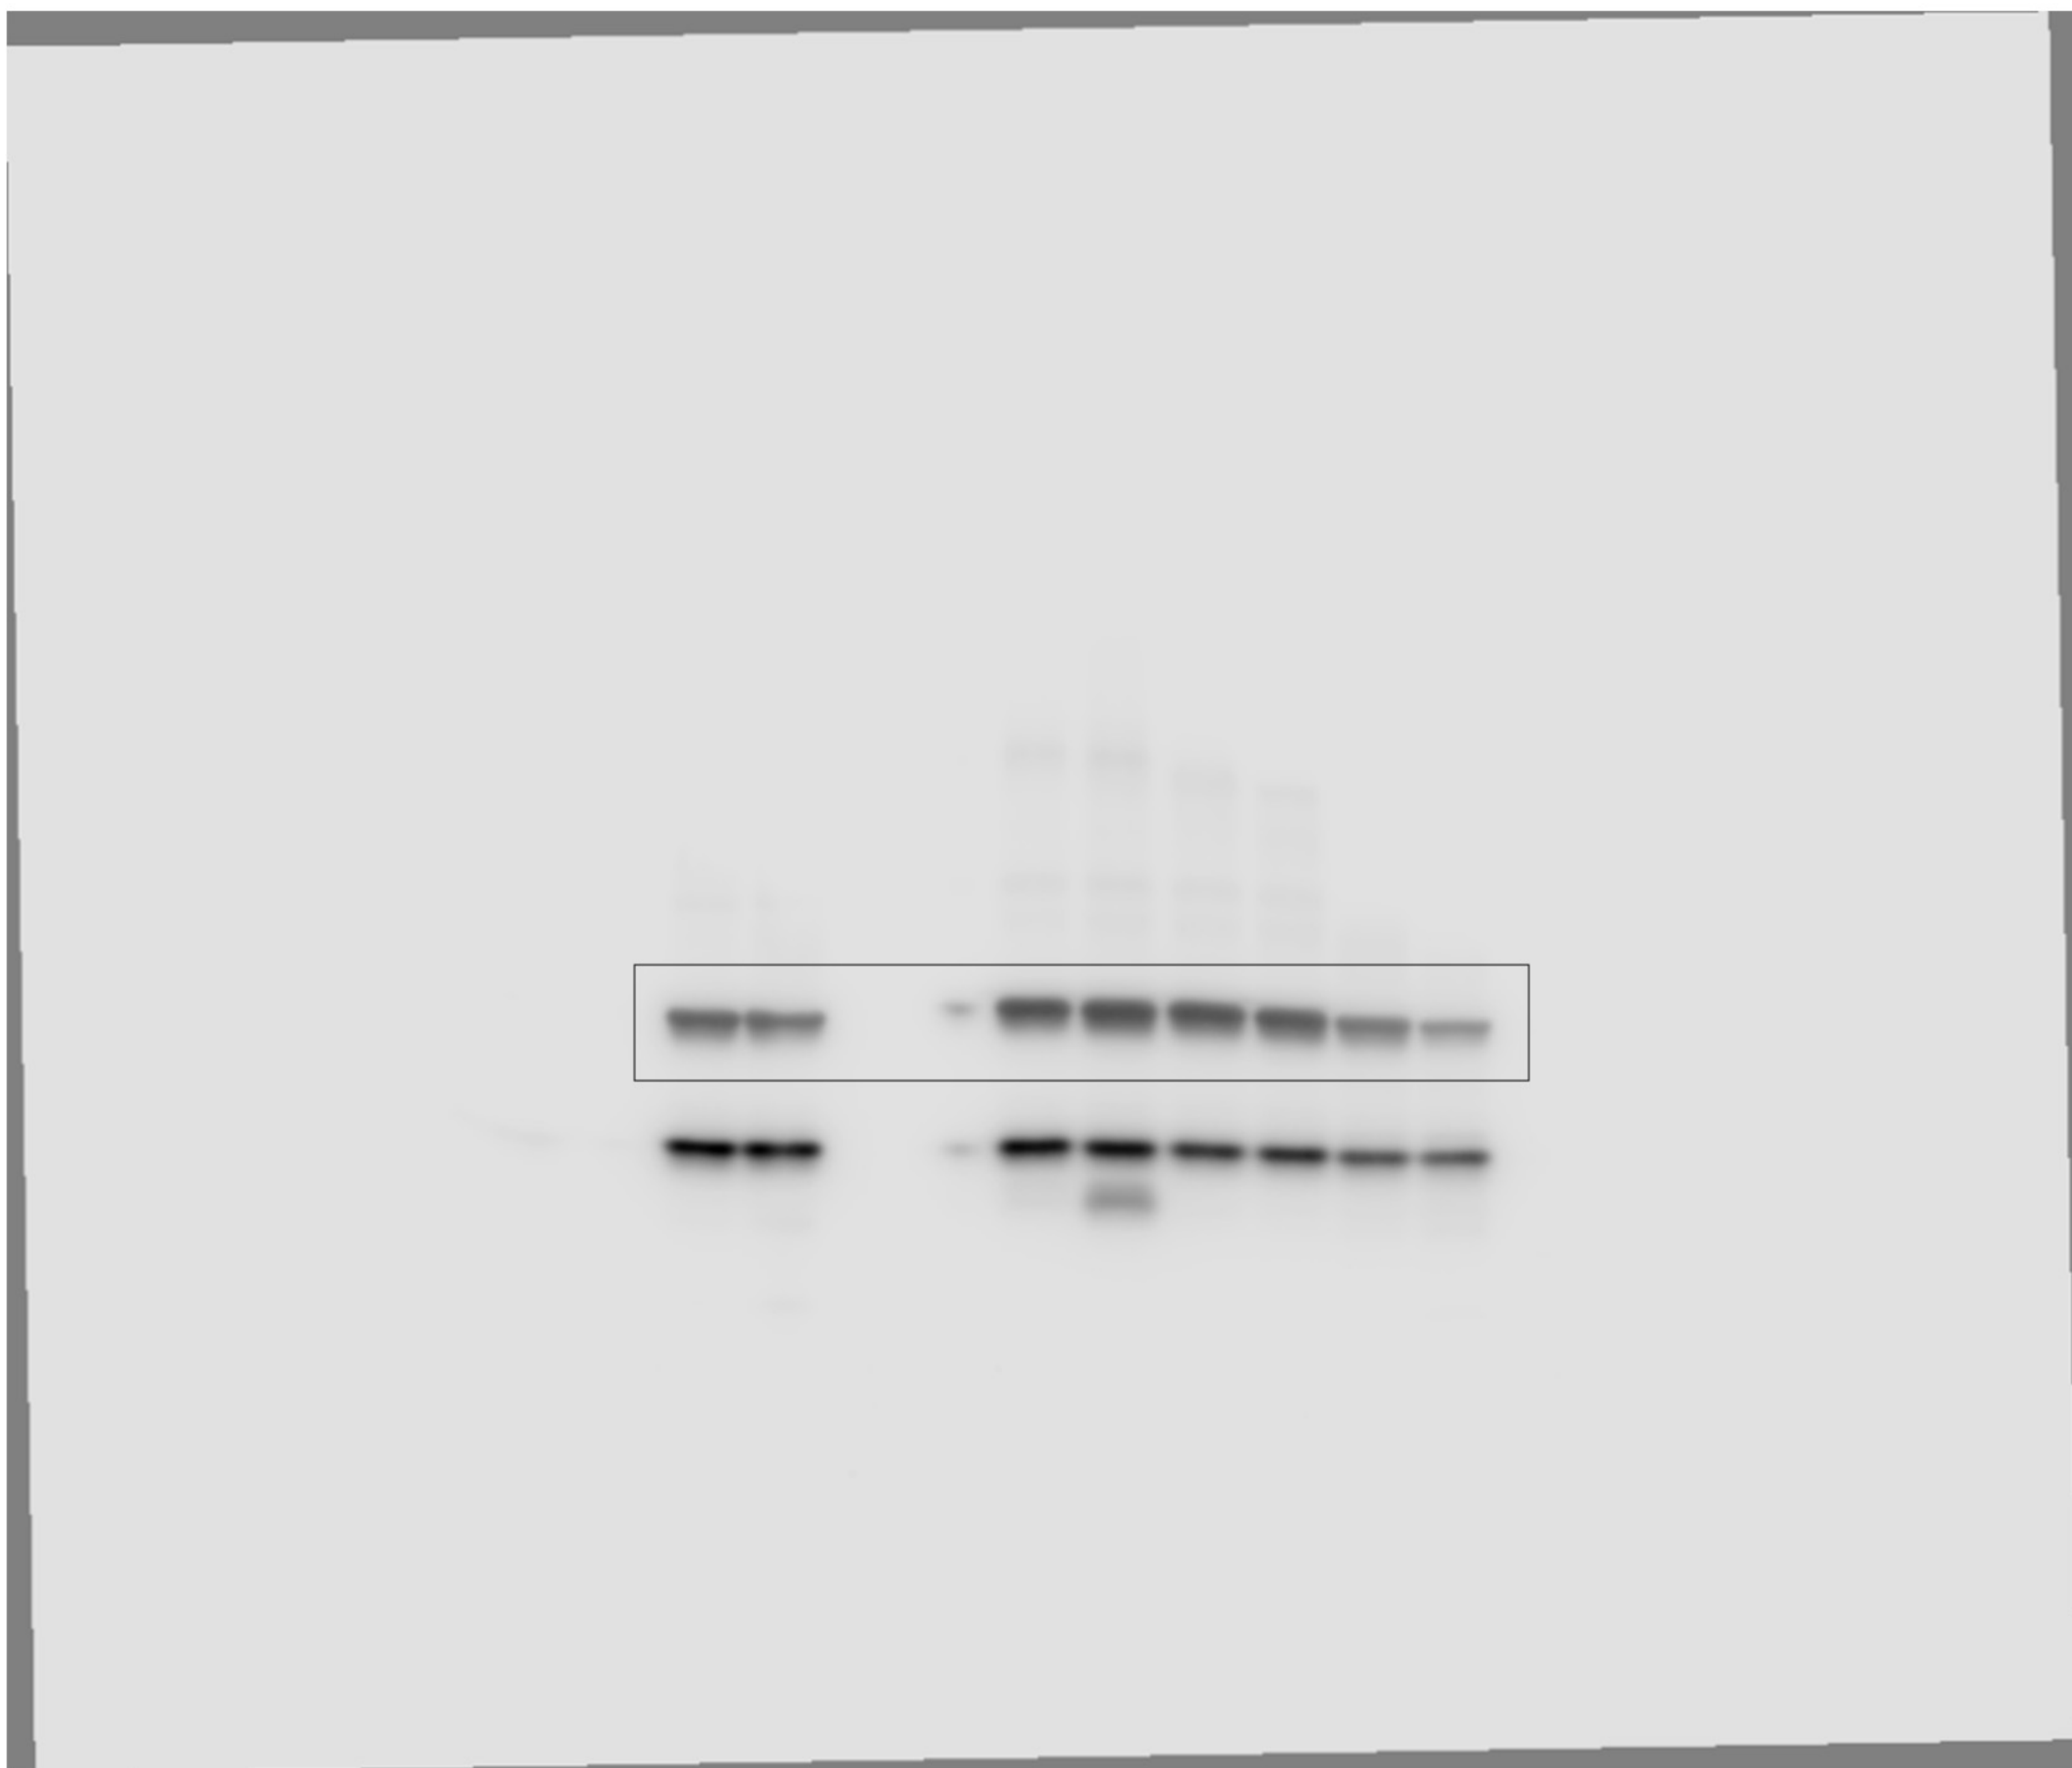

Cropped area for Figure 8D  
Wild-type mito, MDH2

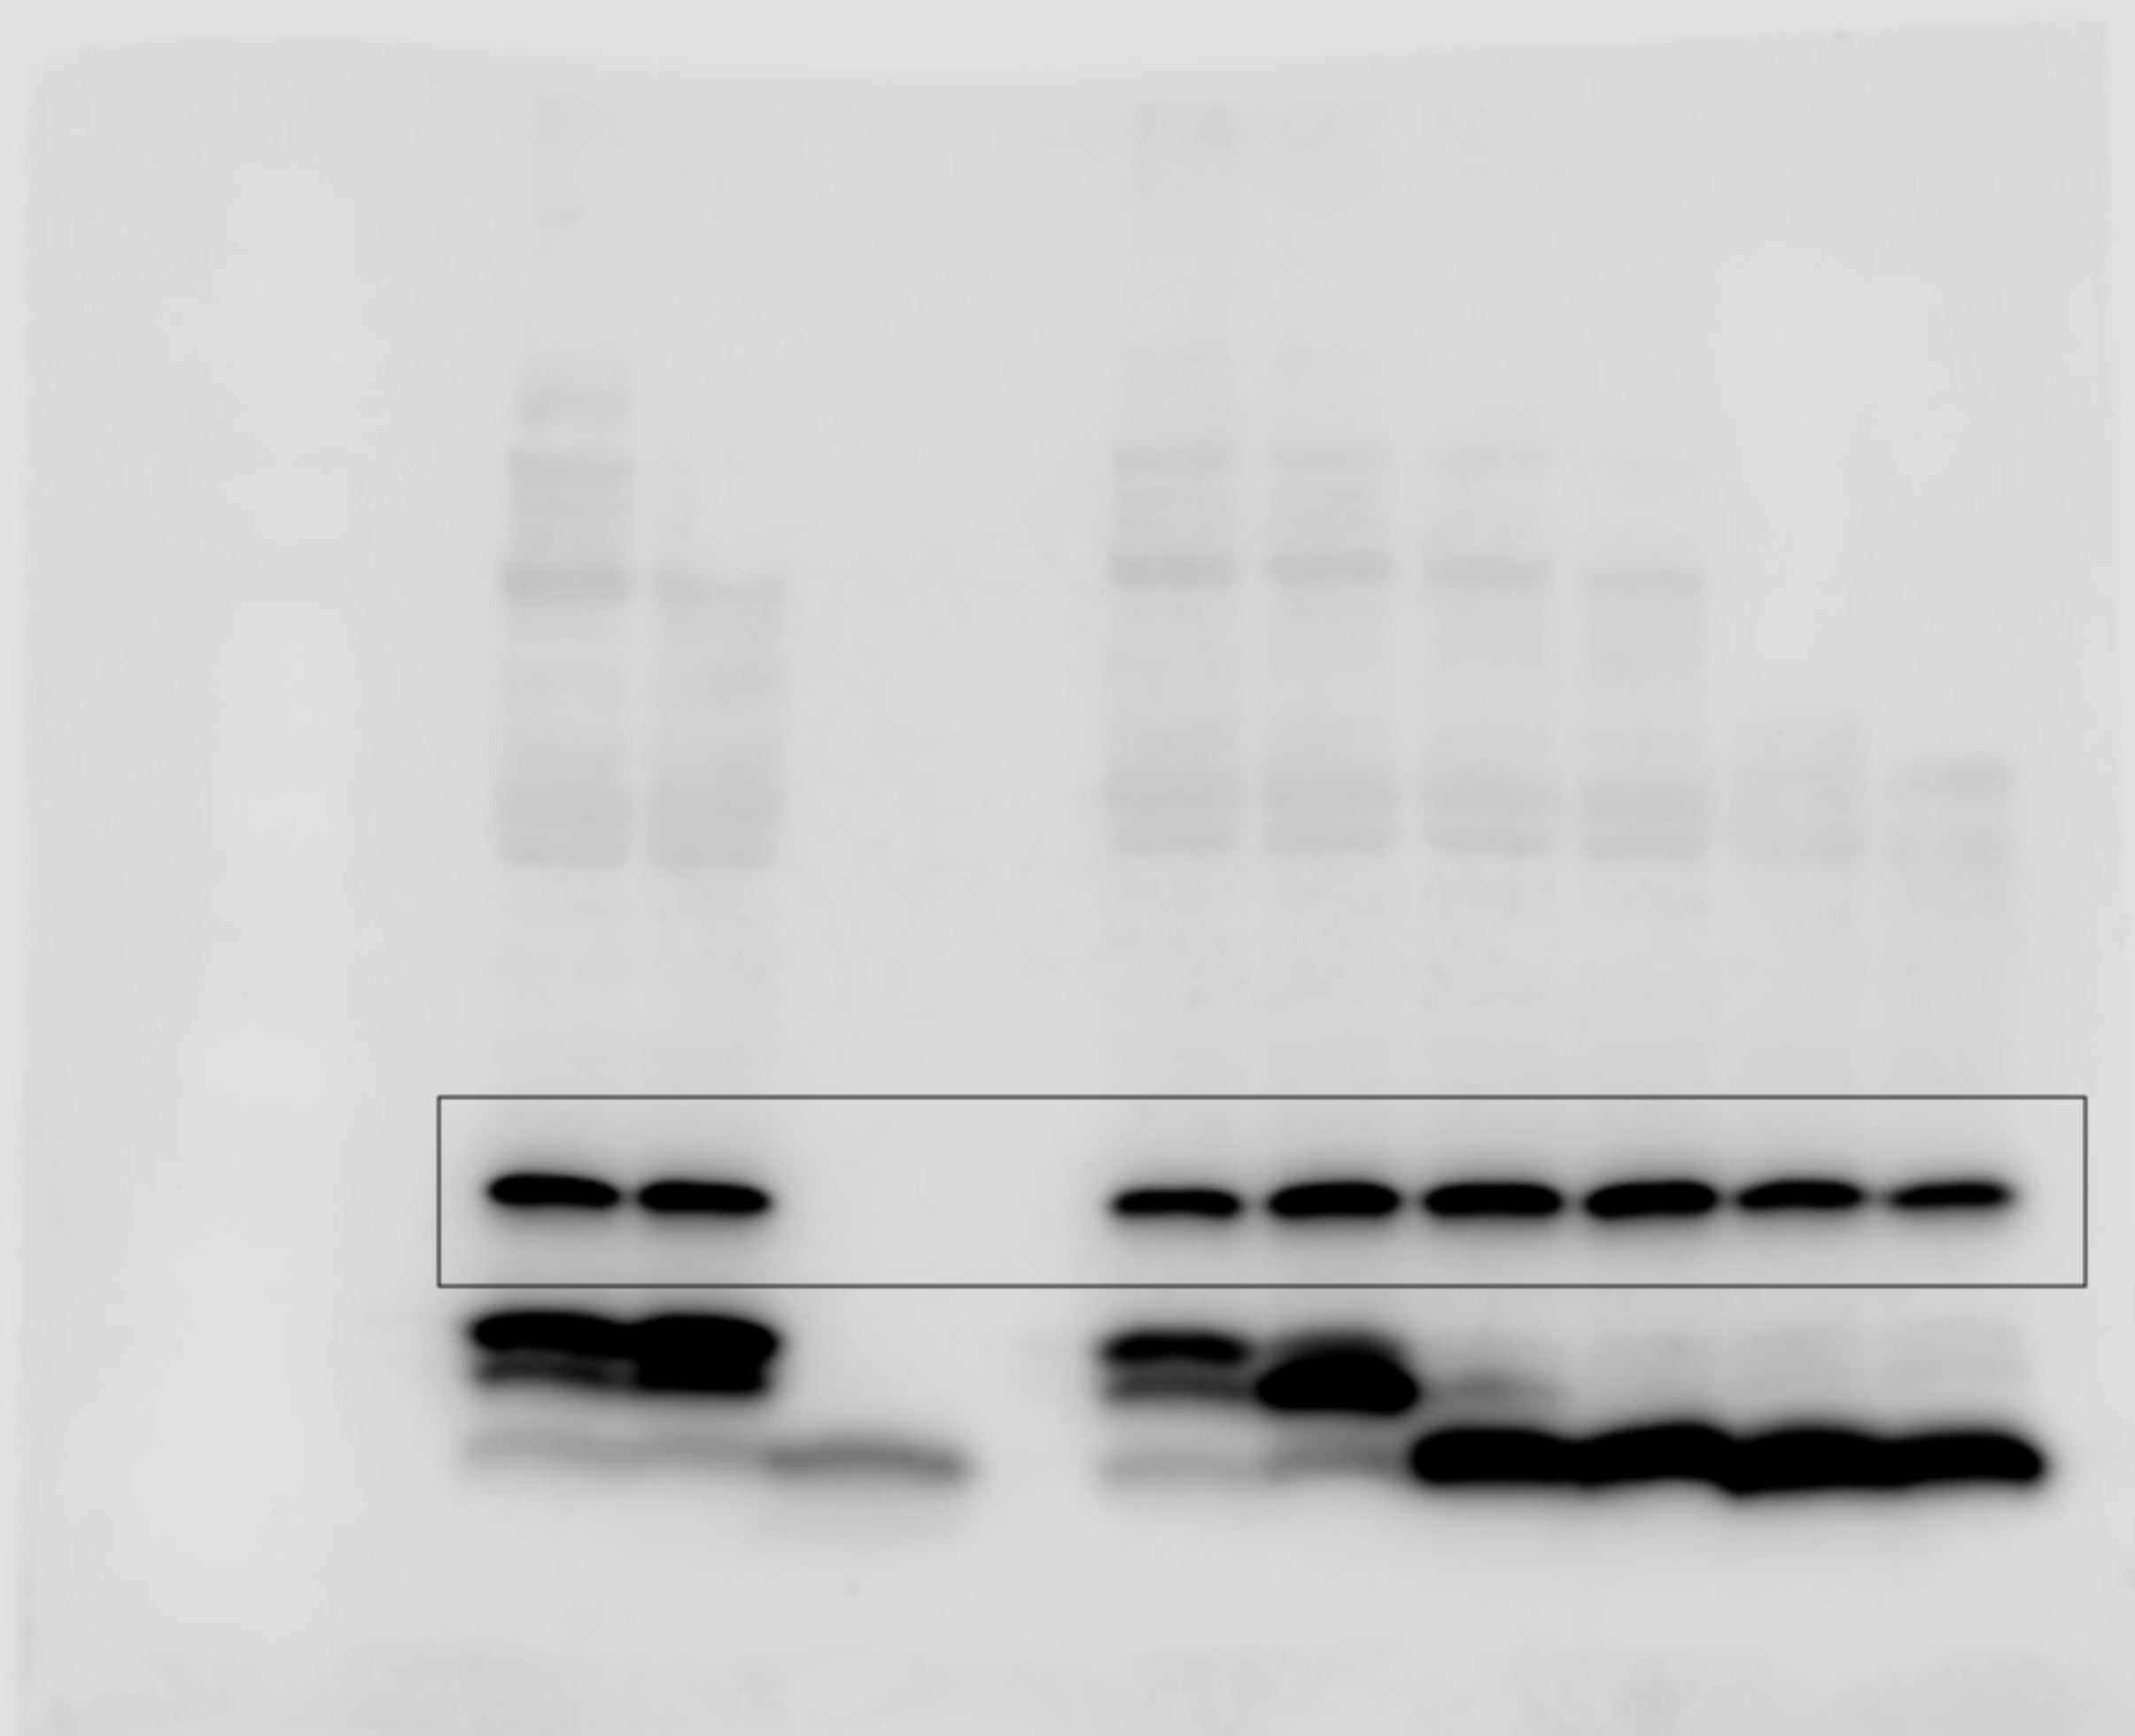

Area cropped for Figure 8D  
Wild-type mito, SMAC

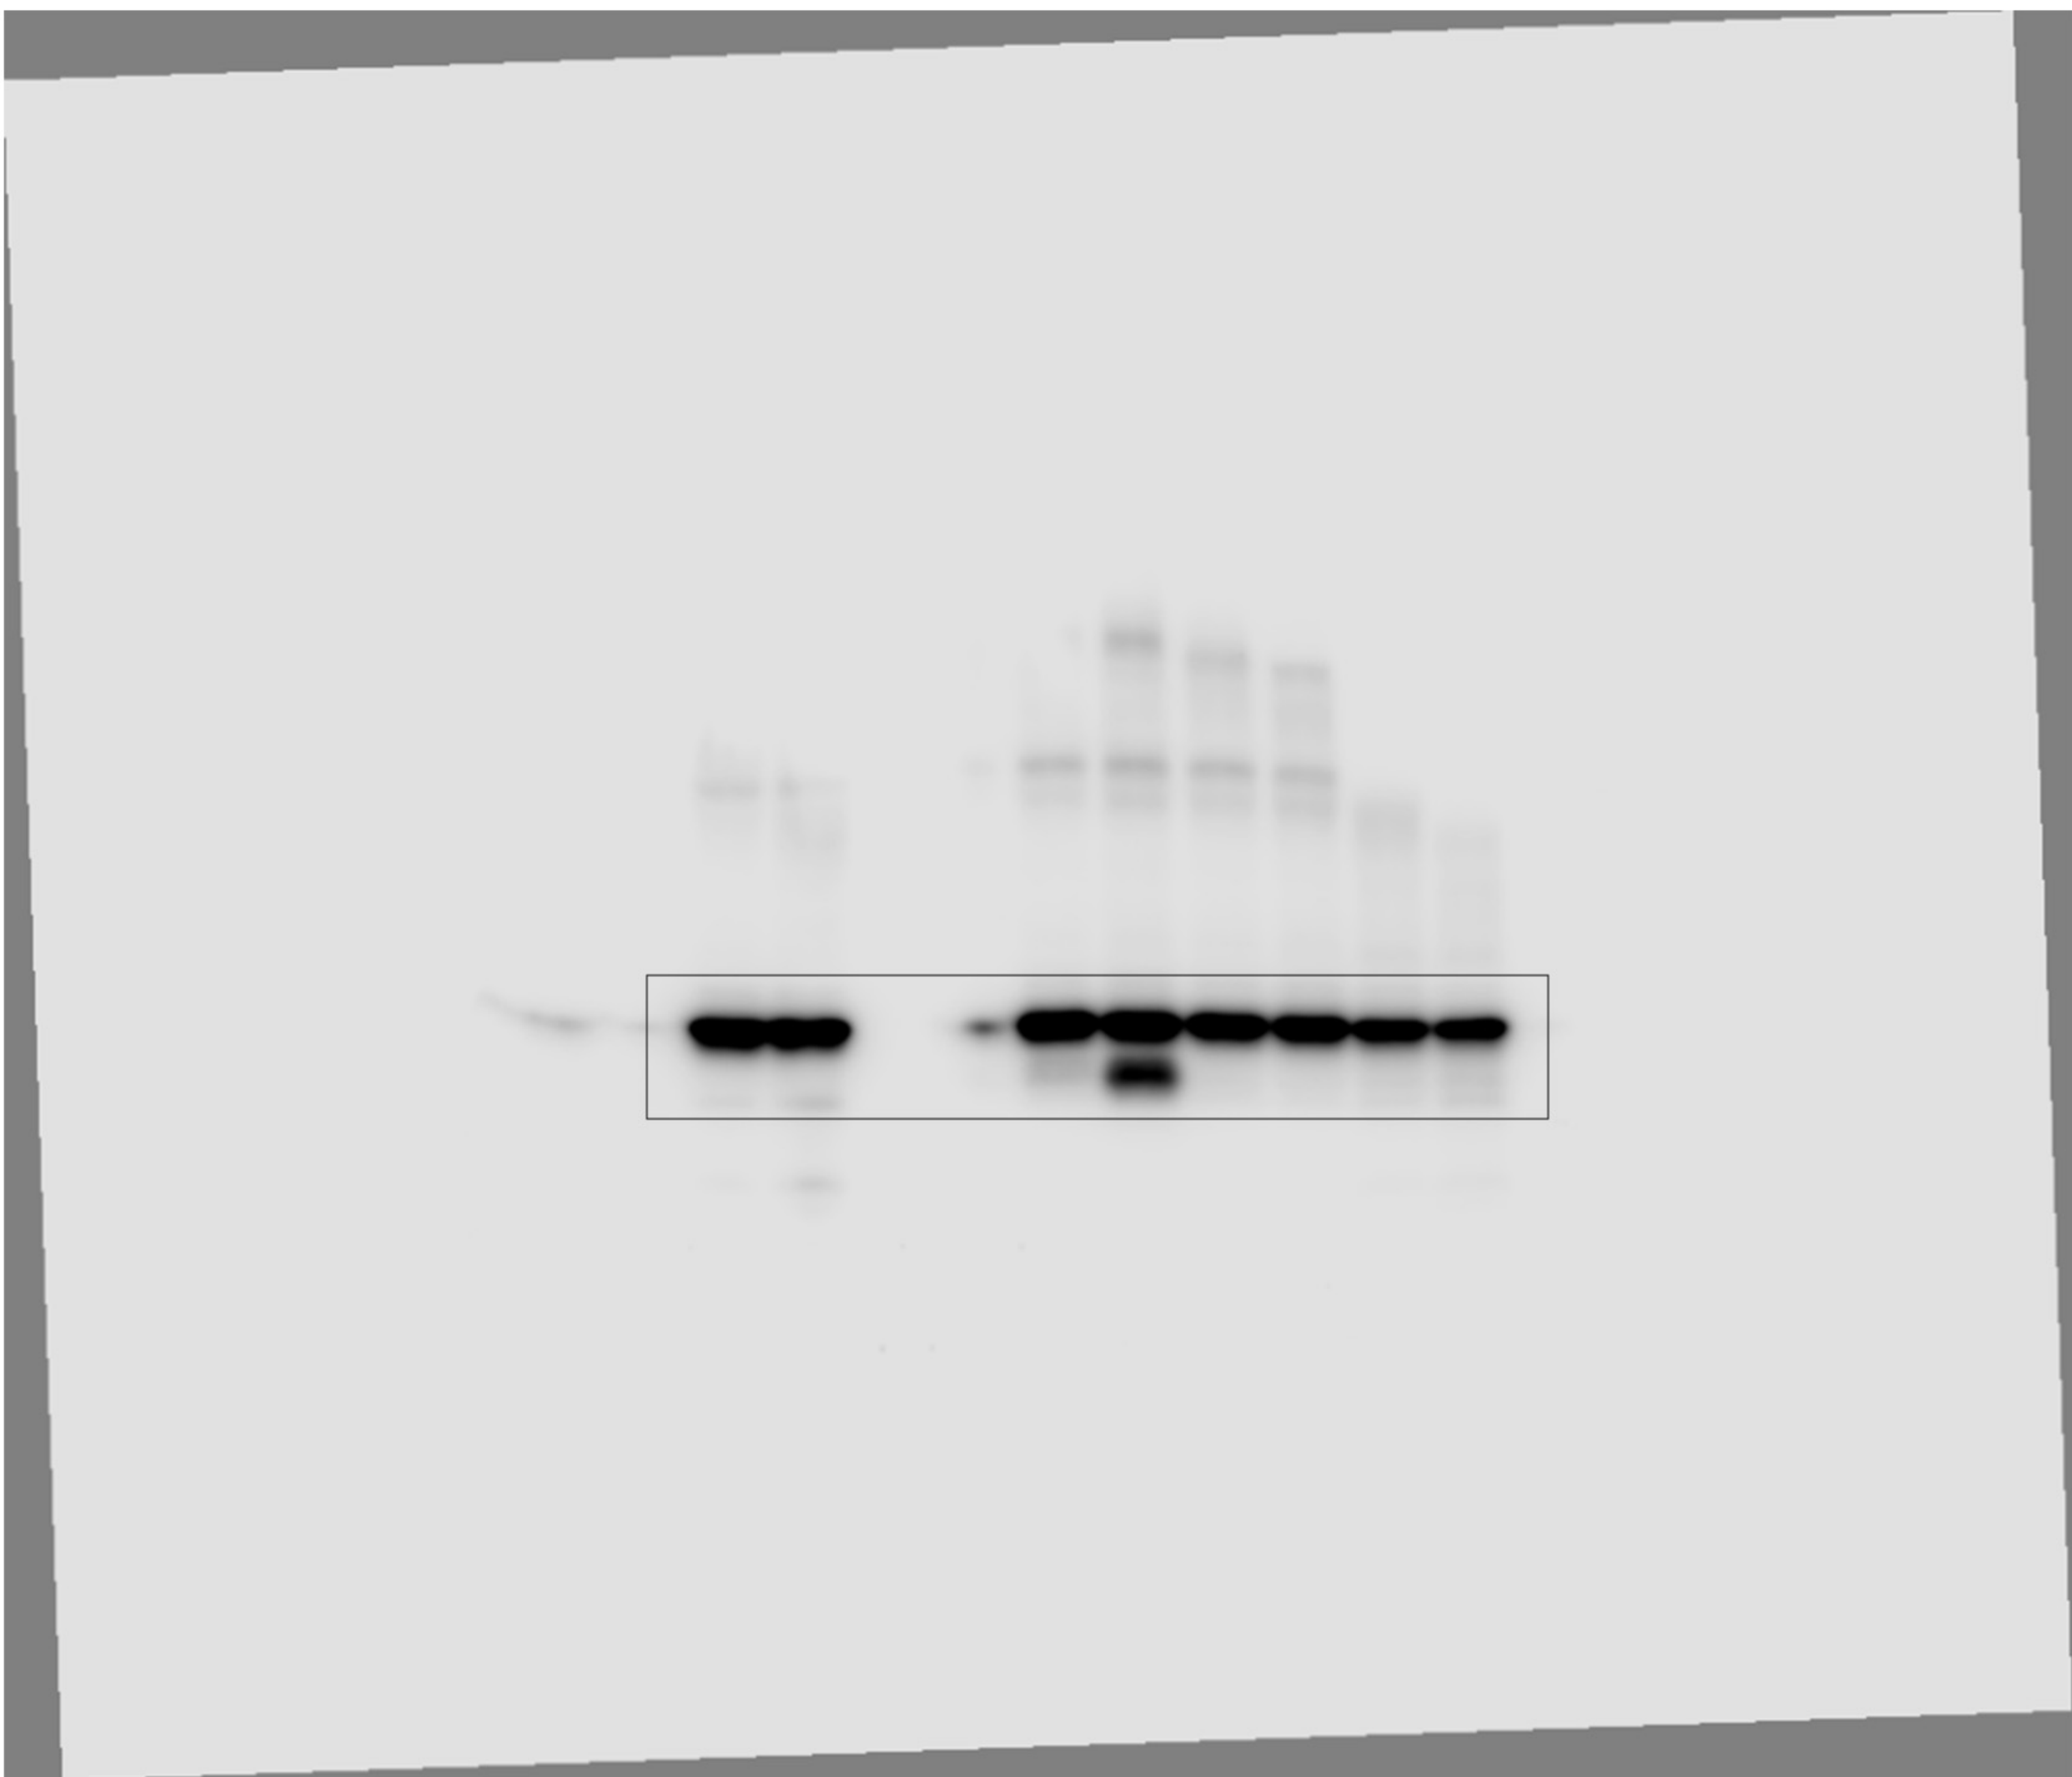

Cropped area for Figure 8D  
Wild-type mito, Tim23

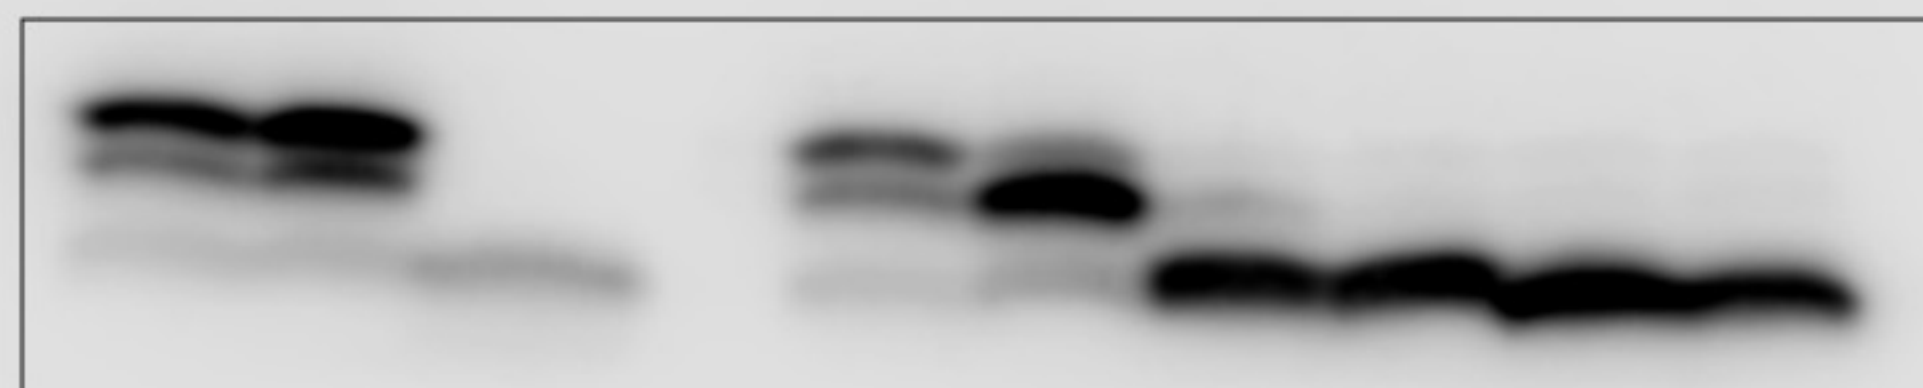

Cropped area for Figure 8D  
Wild-type mito, TOM20
