# Supplementary material for: Mitochondrial protein import clogging as a mechanism of disease
Source: eLife journal article supplement (doi:10.7554/elife.84330), 2023-05-02
Supplement: fig8-figsupp1-data2 [file Figure 8-figure supplement 1-source data annotated.pdf › Figure 8-figure supplement 1-source data 1/Figure 8-figure supplement 1-source data annotated.pdf]

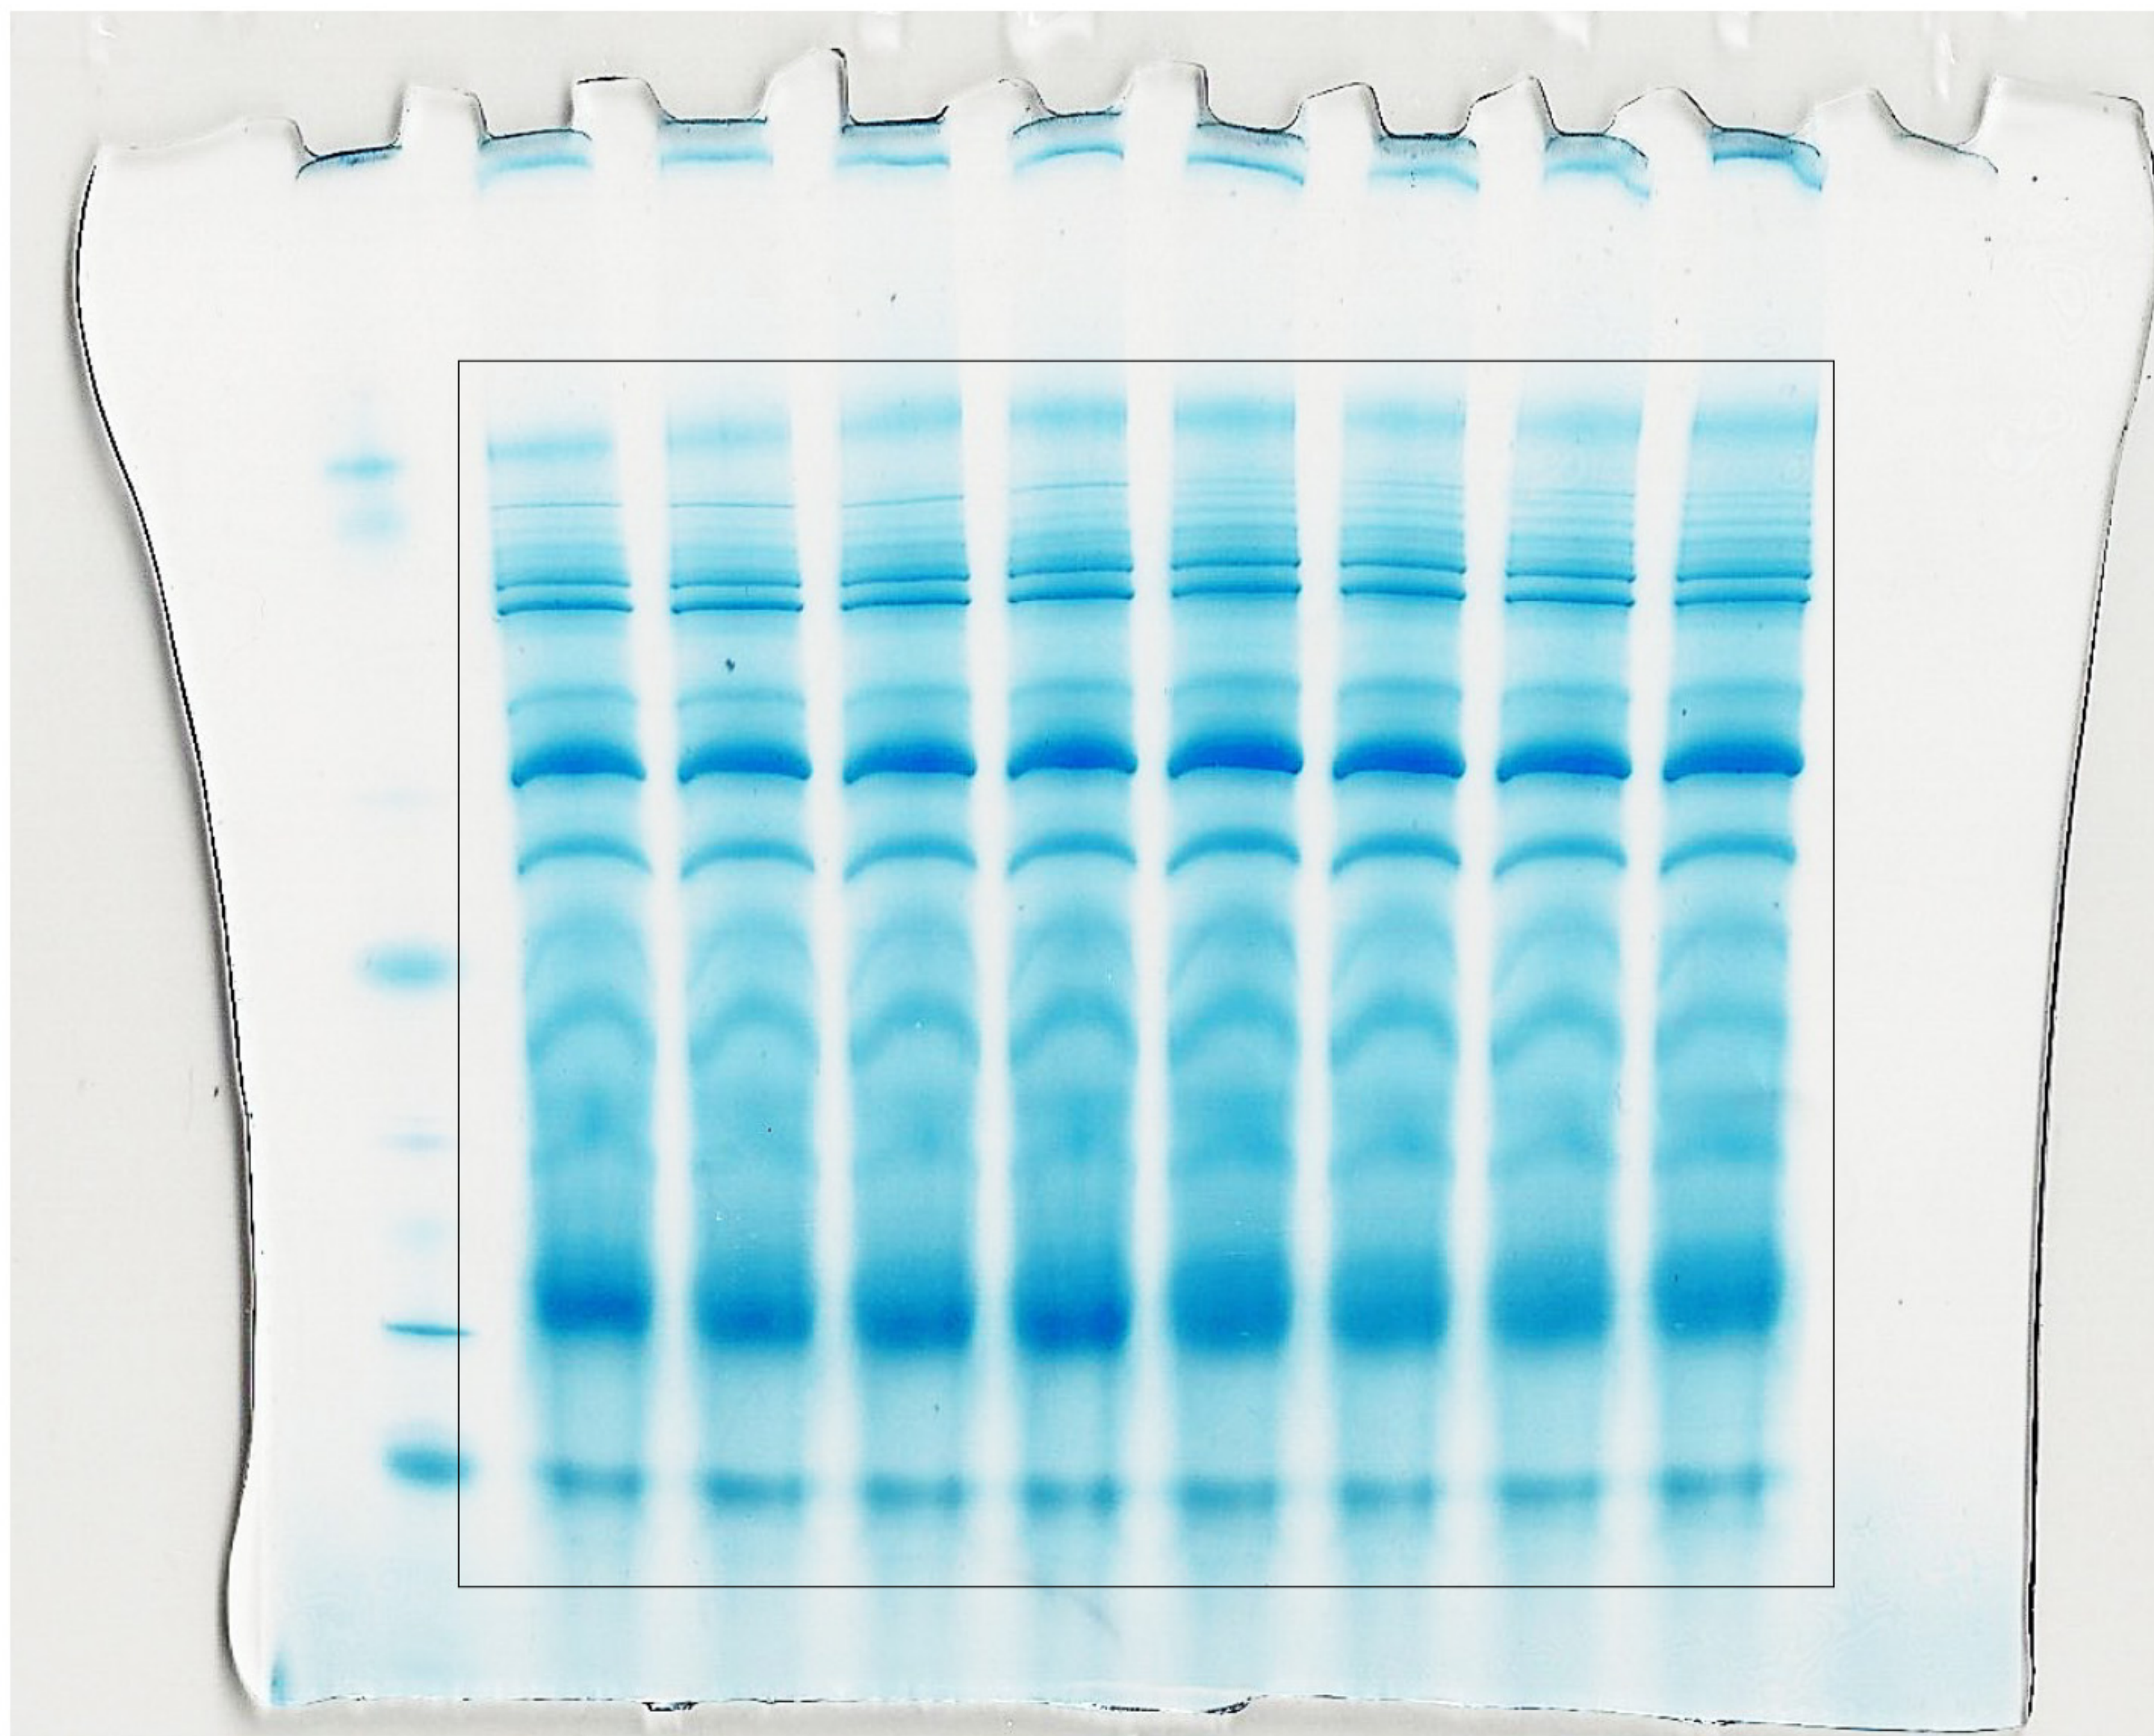

Cropped area for Figure 8-figure supplement 1C  
Coomassie-stained BN-PAGE gel of mouse muscle mito



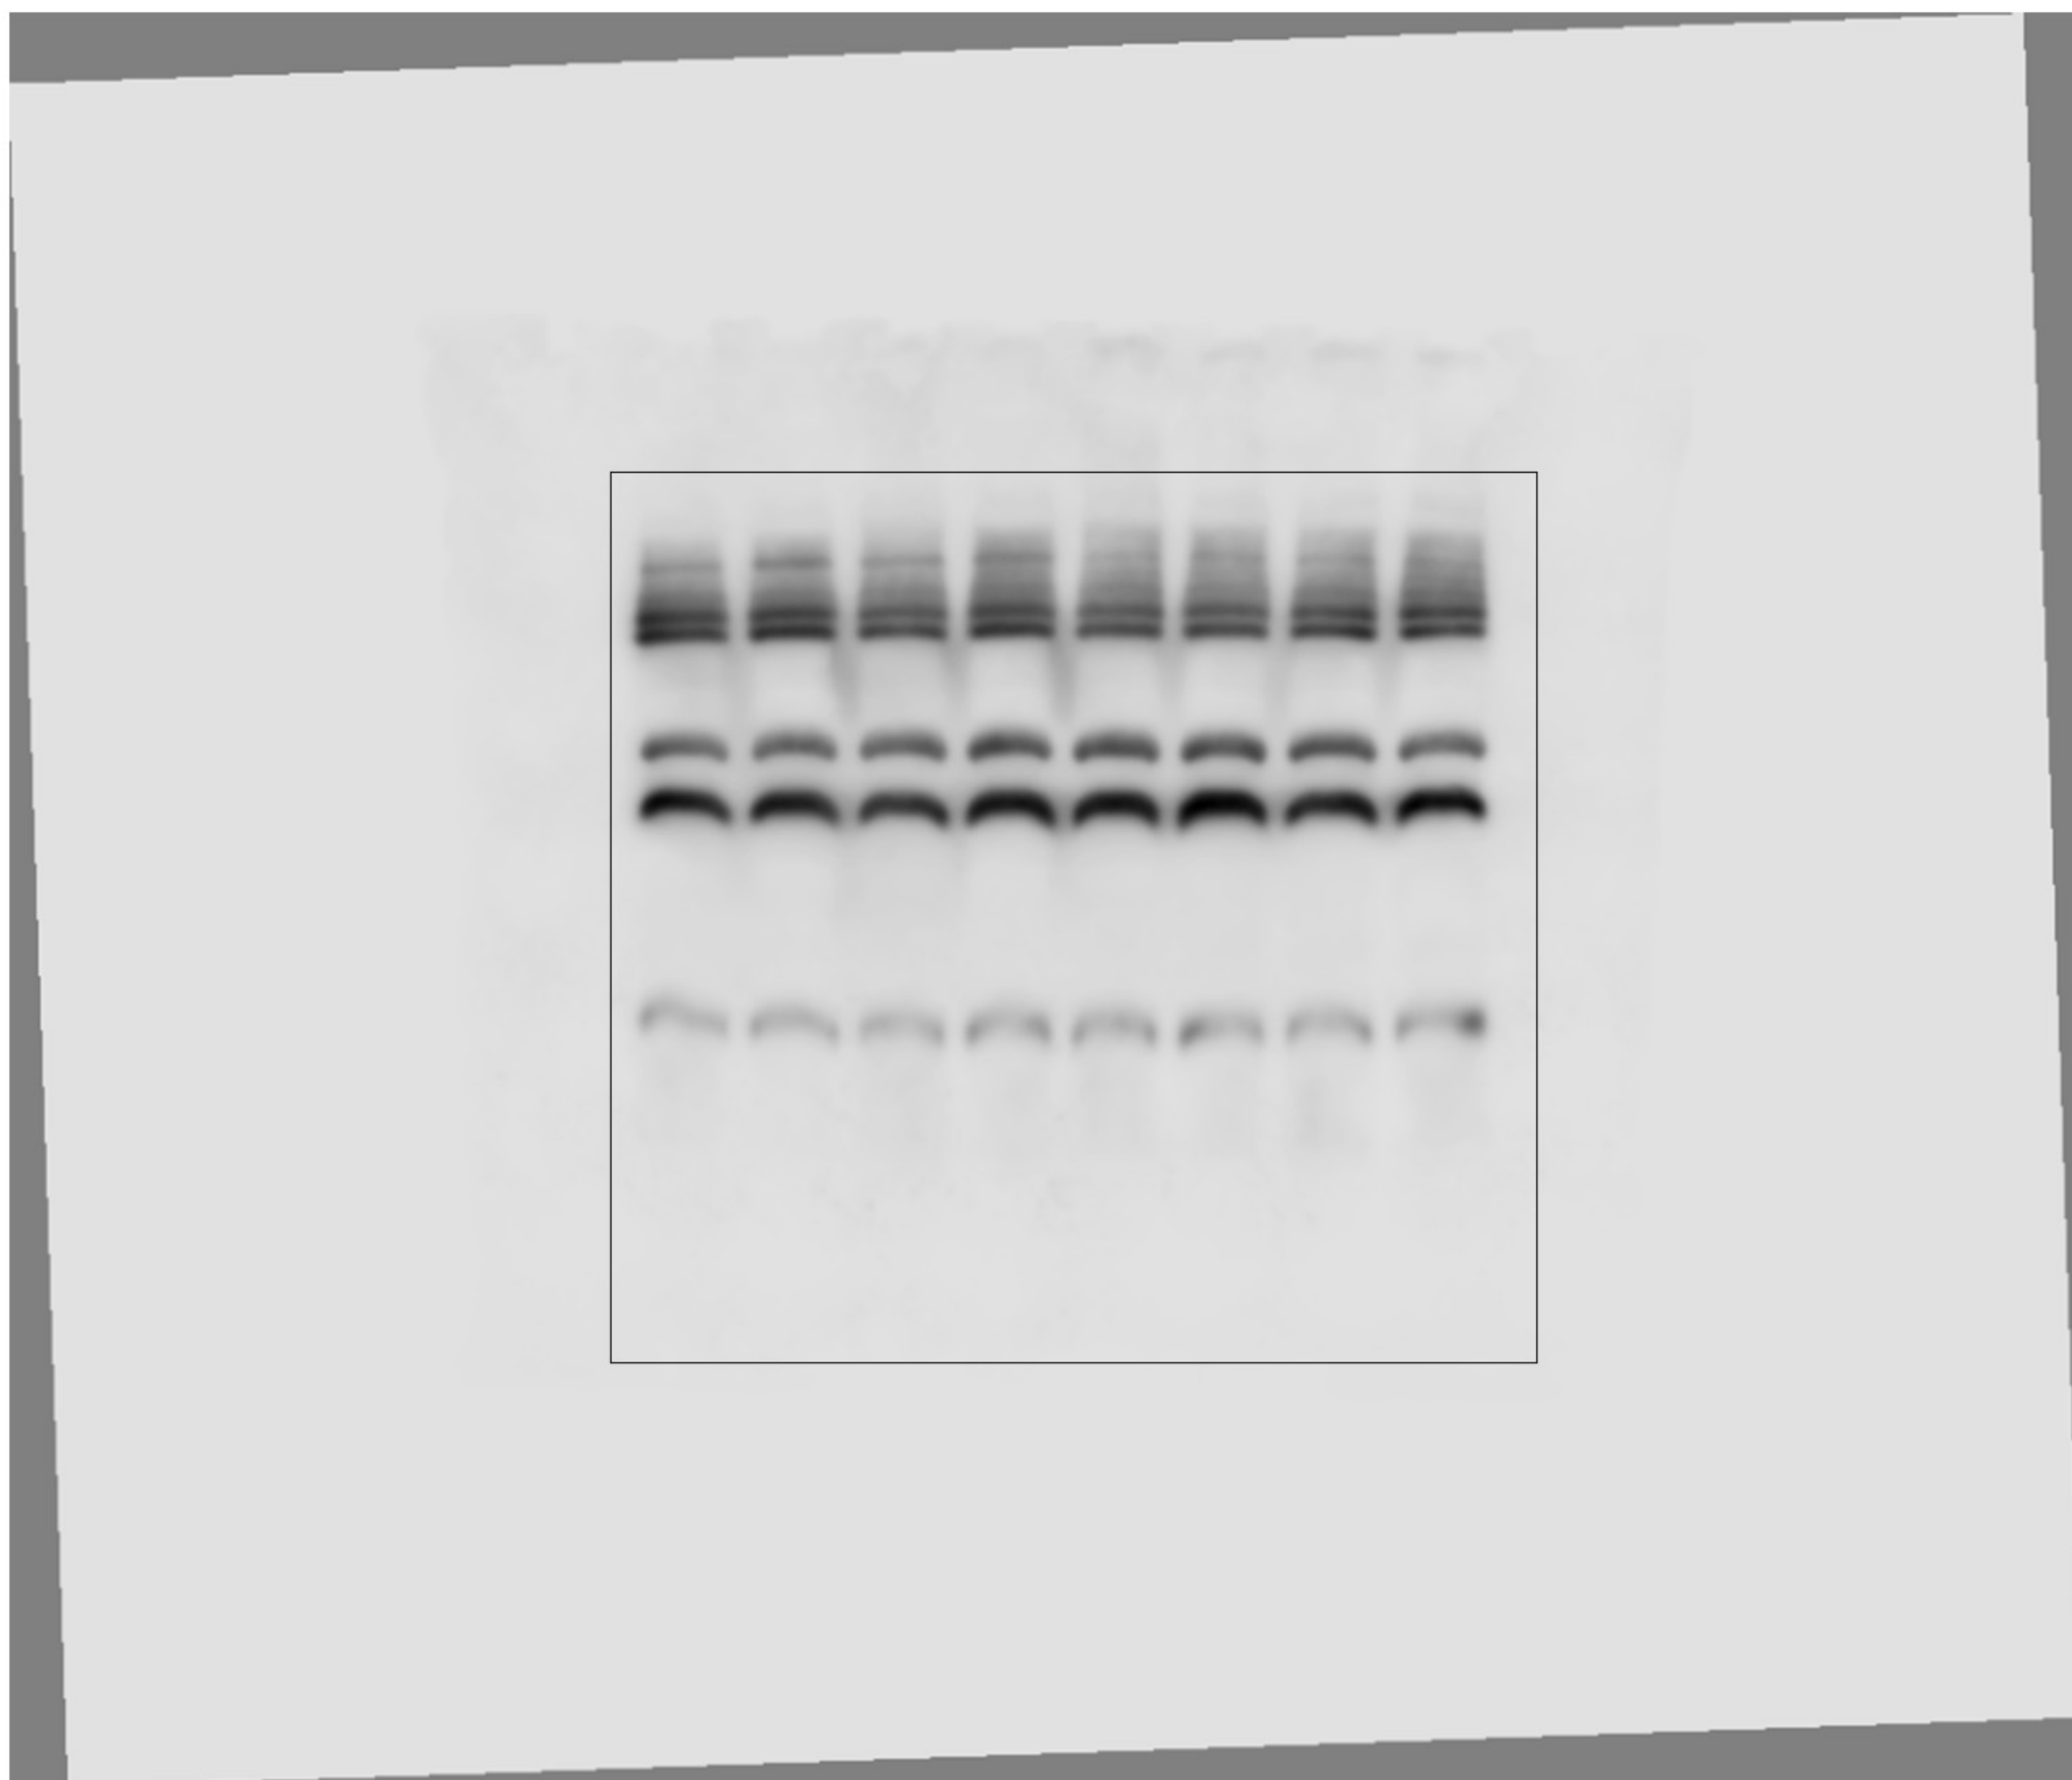

Cropped area for Figure 8-figure supplement 1D  
BN-PAGE\_Oxphos cocktail

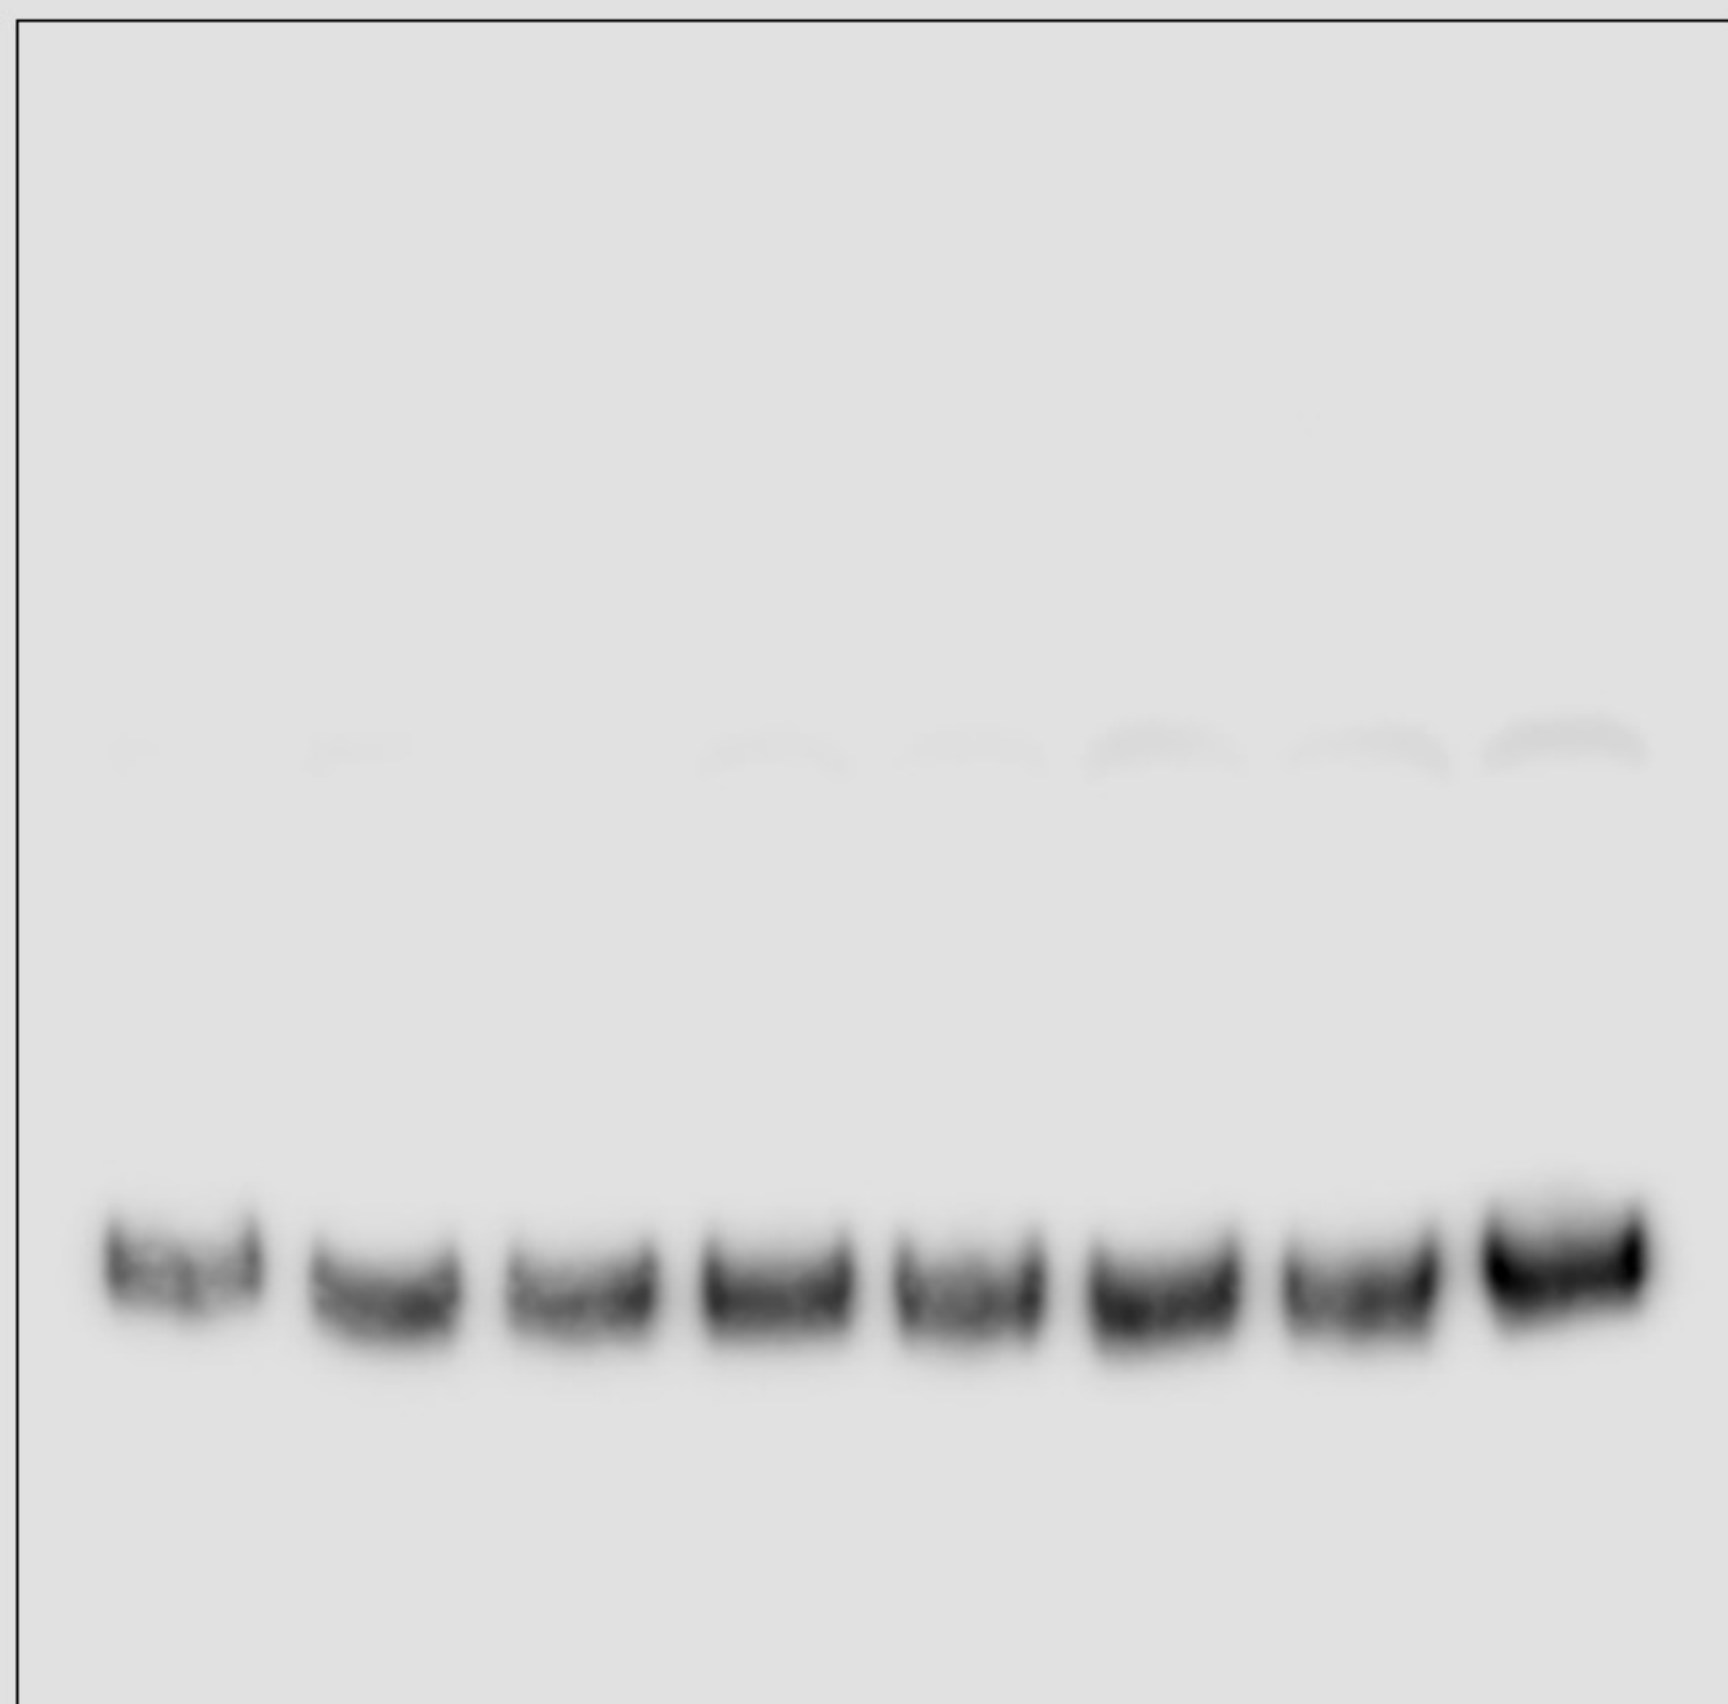

Cropped area for Figure 8-figure supplement 1E  
BN-PAGE\_Tim23

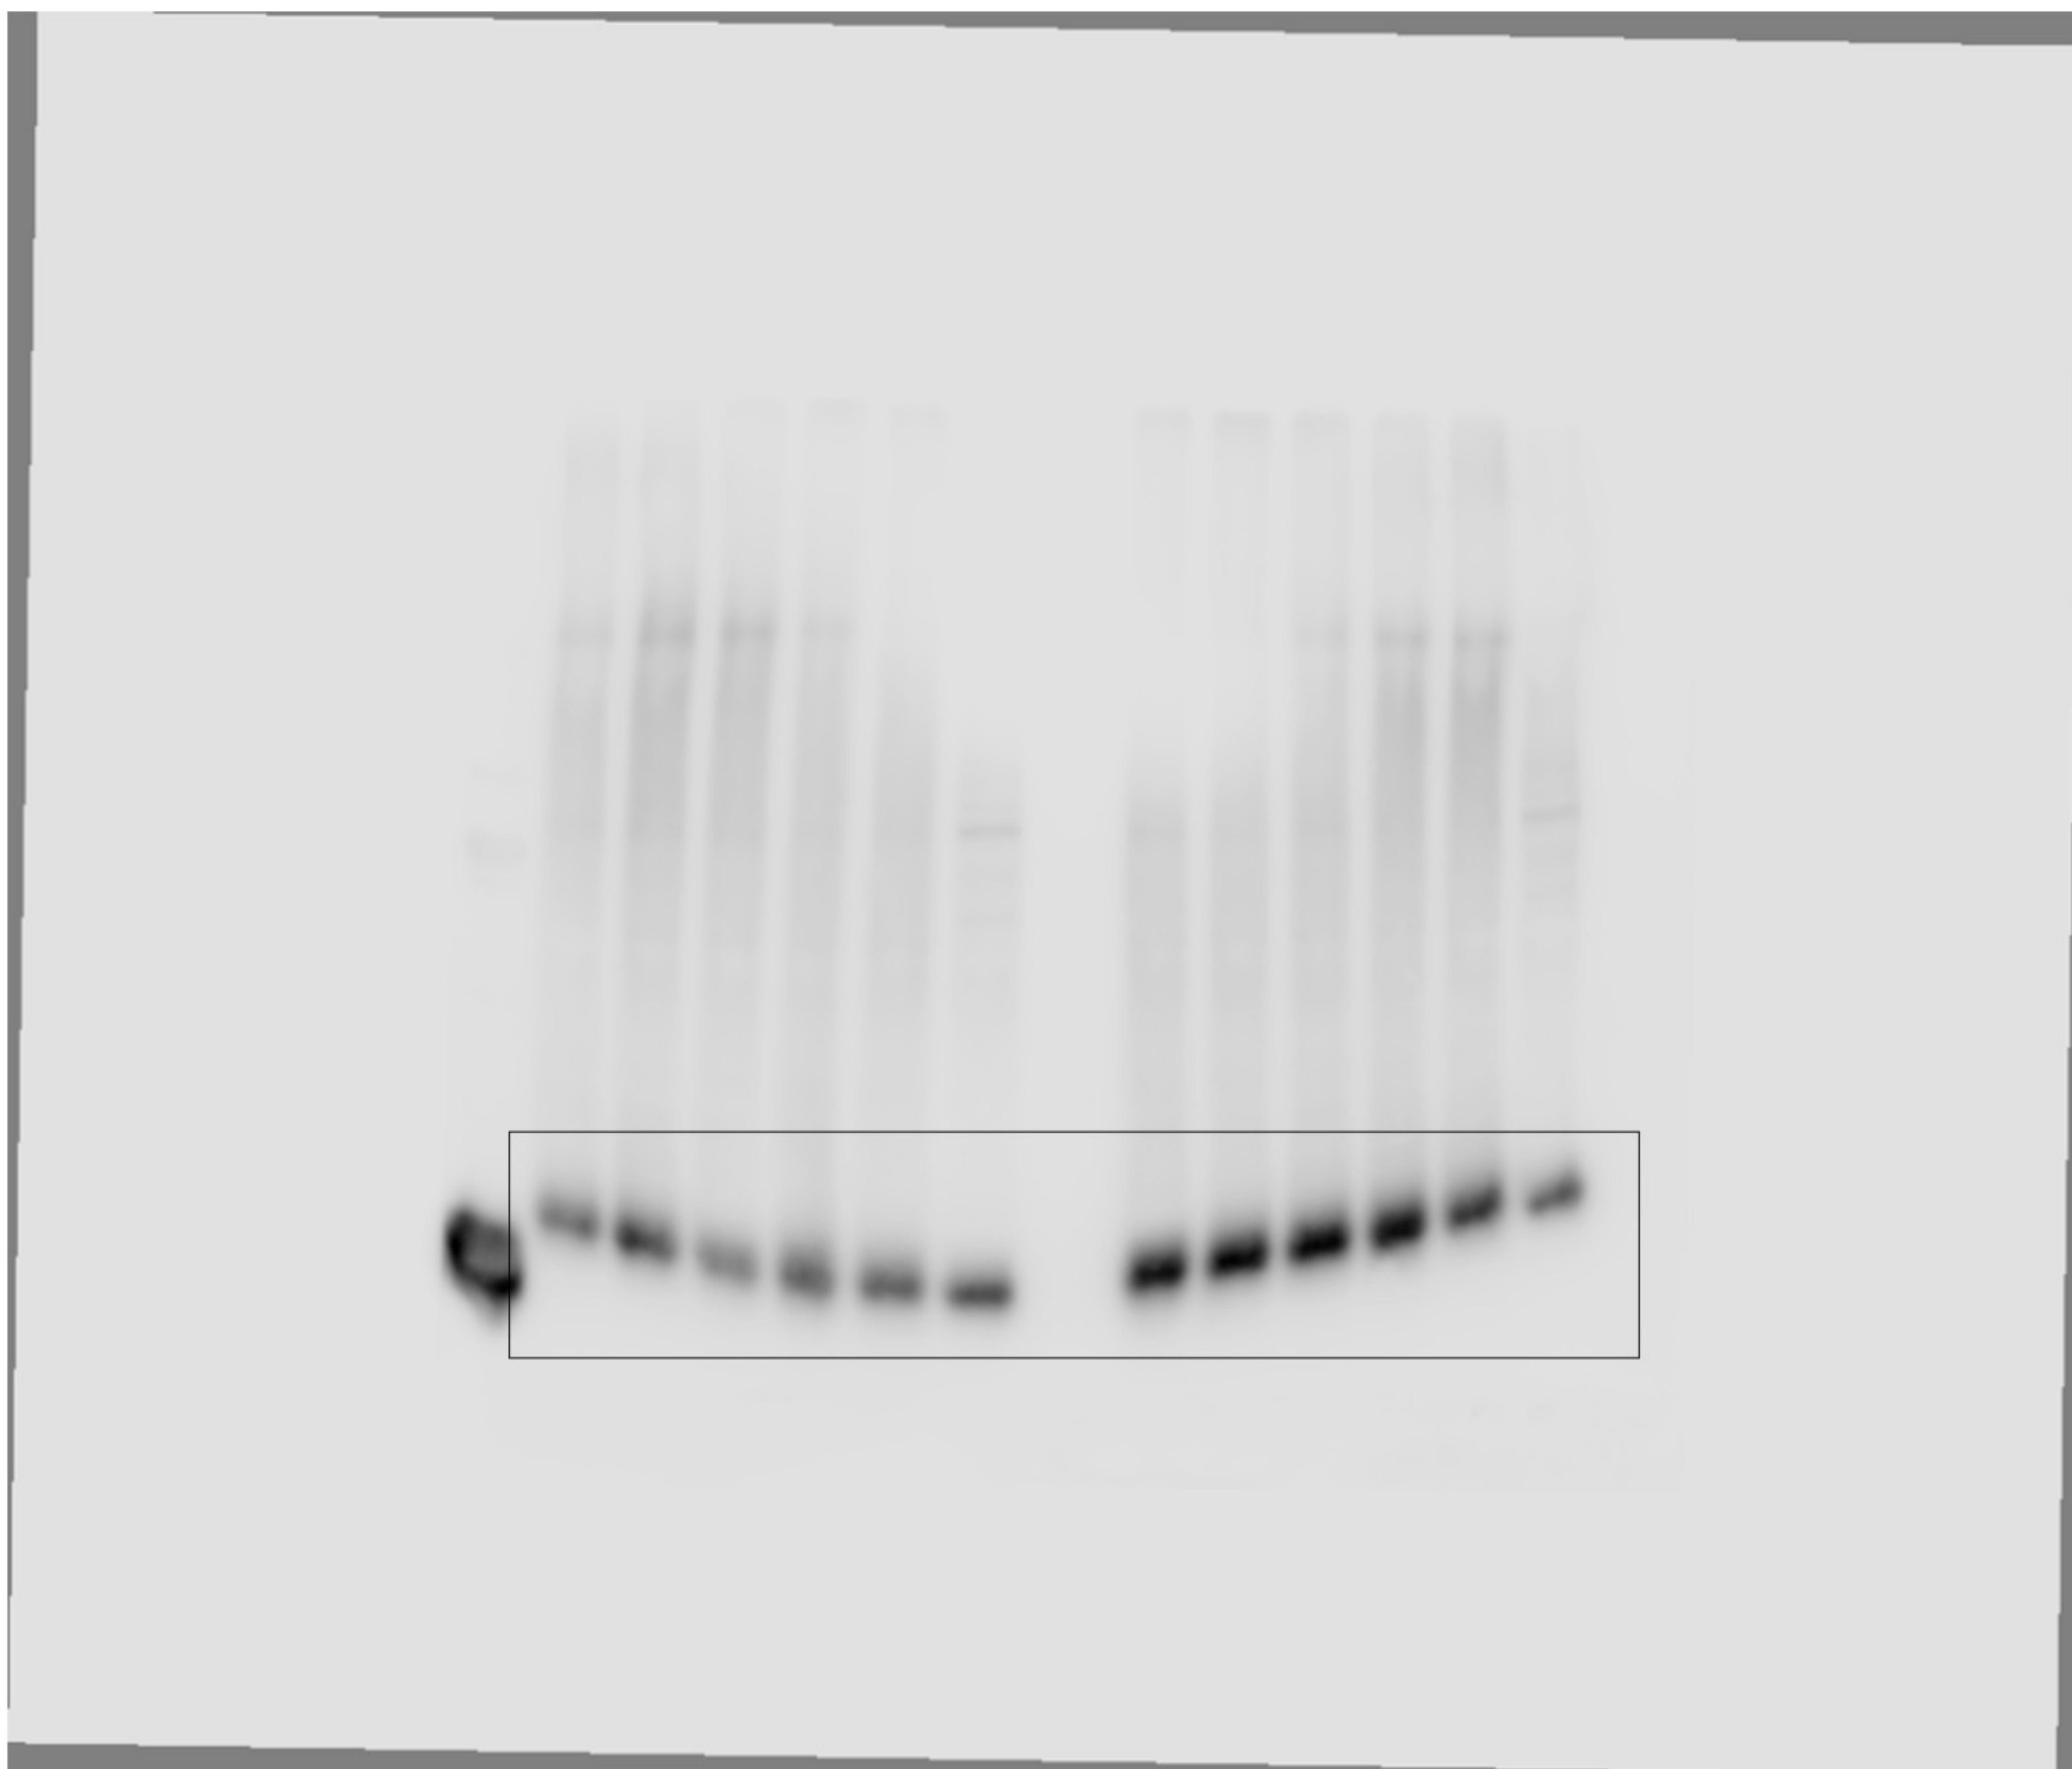

Cropped area for Figure 8-figure supplement 11  
Tim22

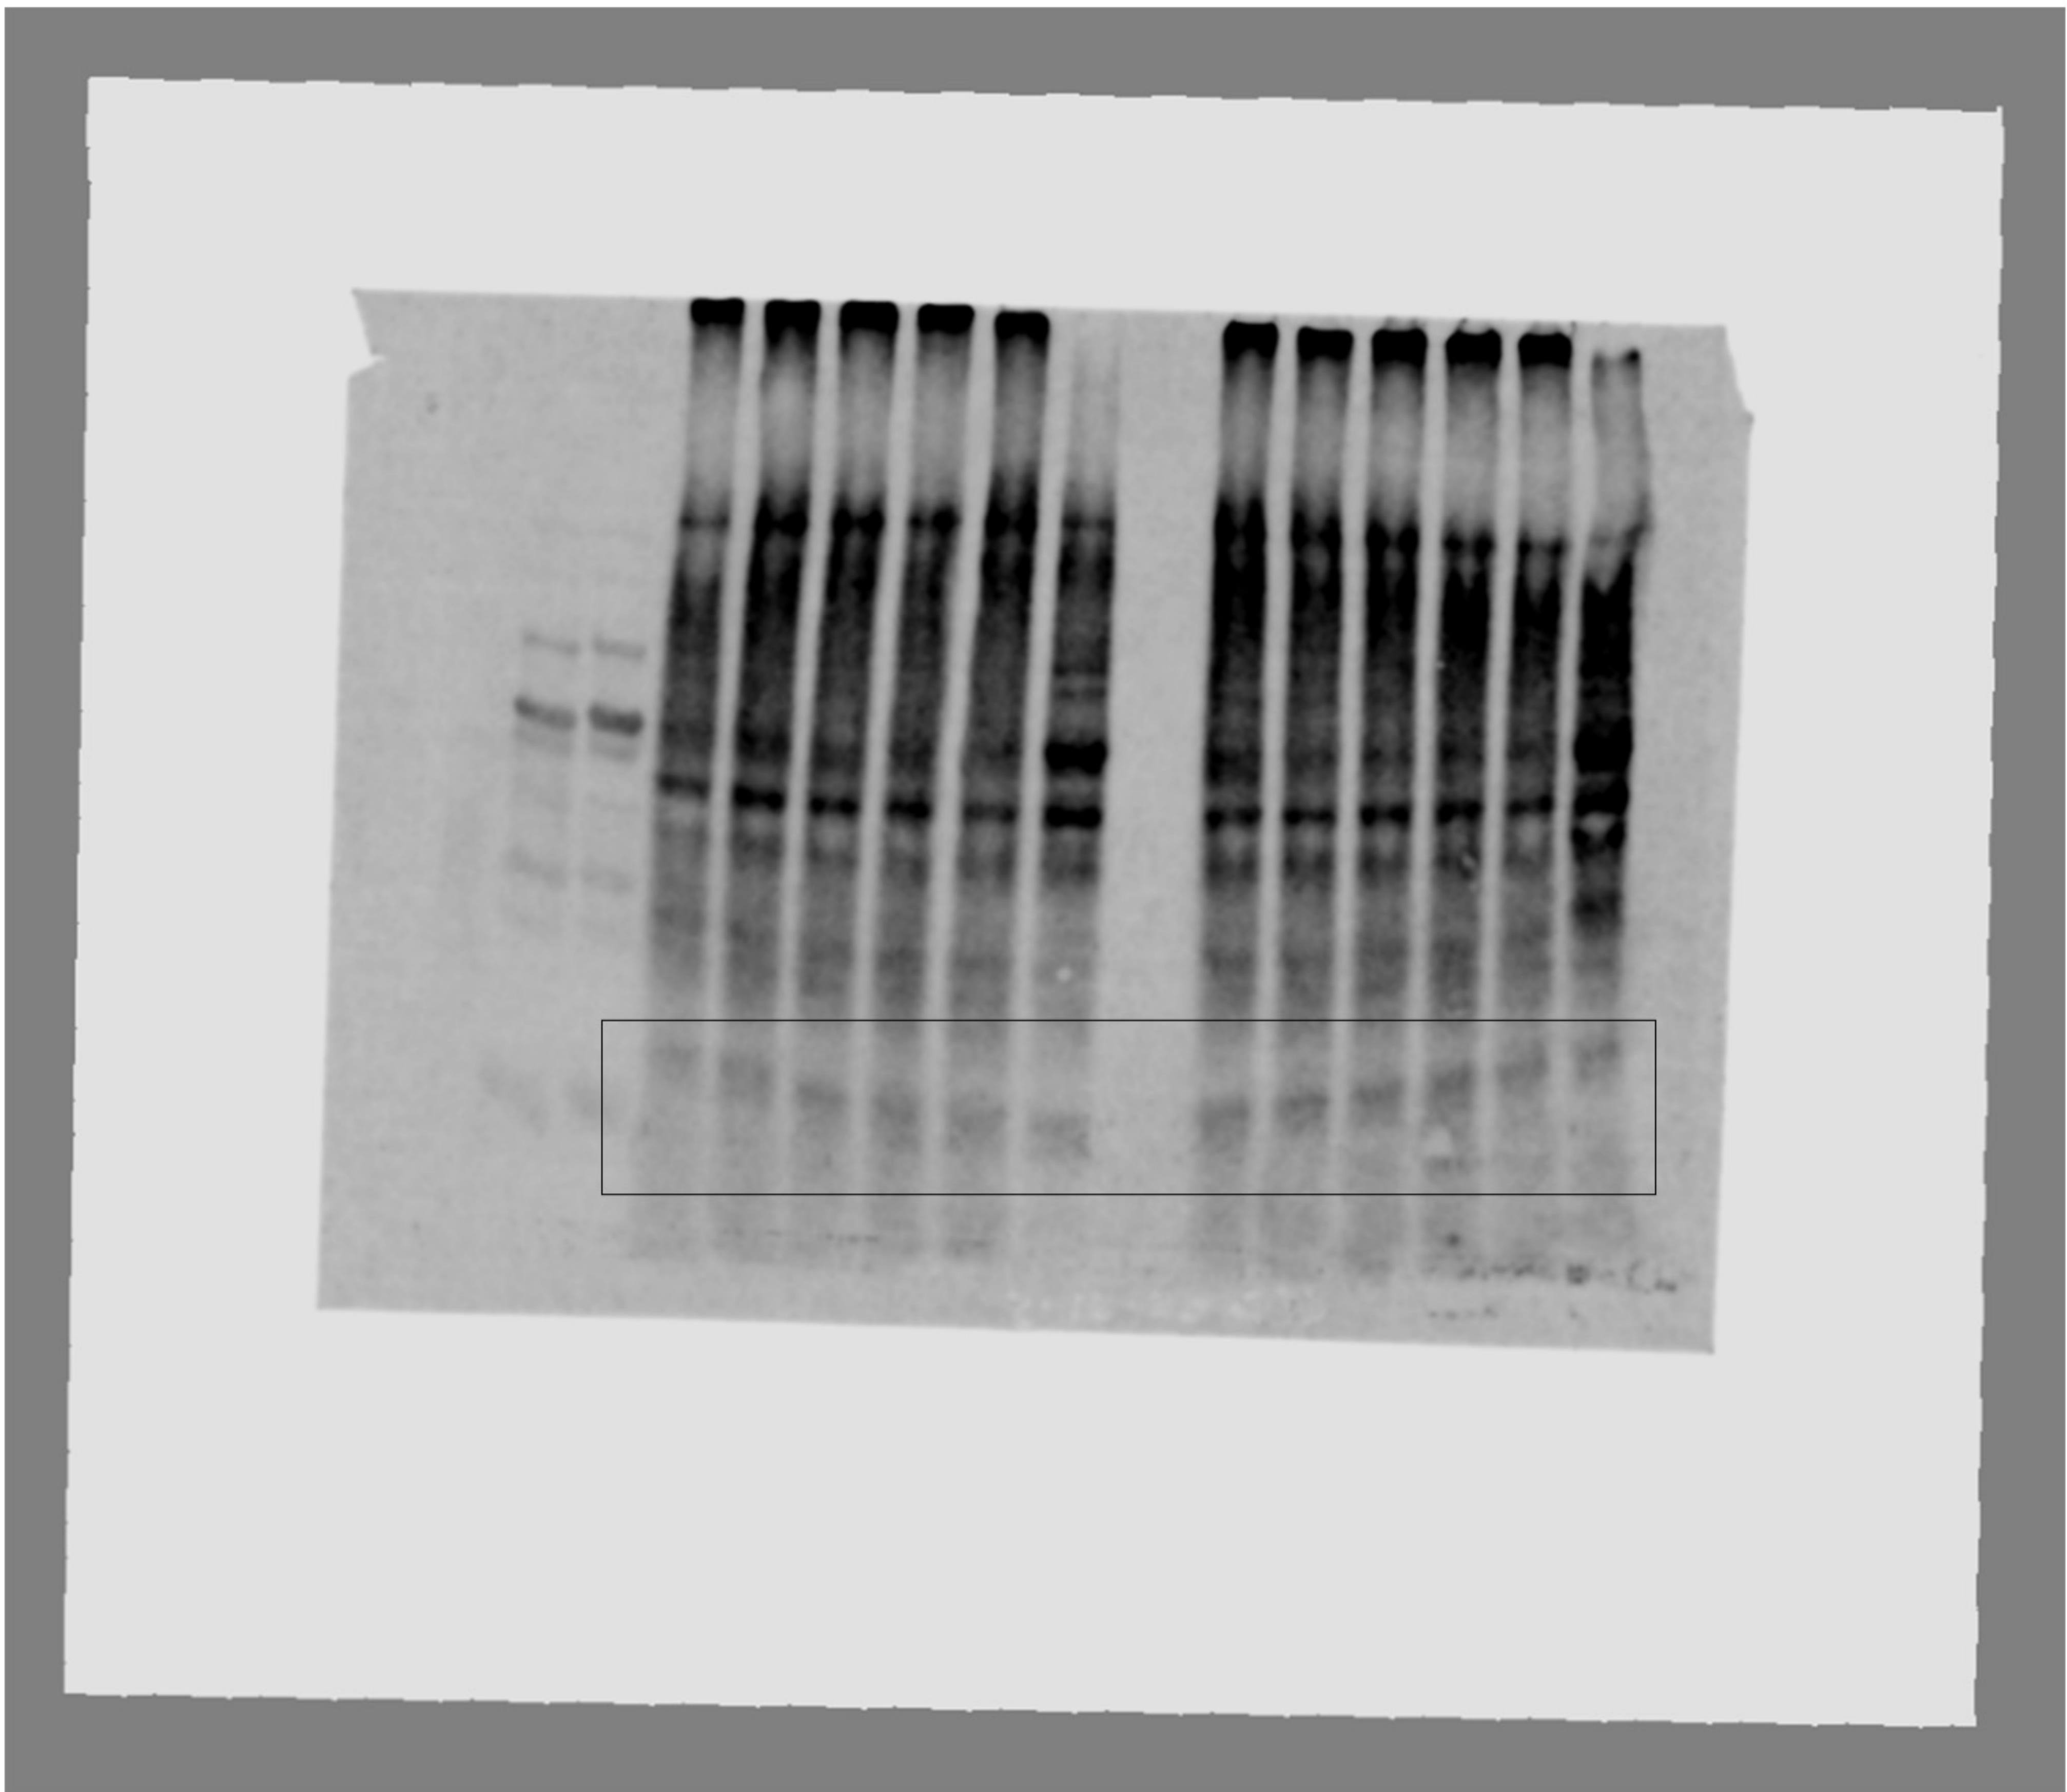

Cropped area for Figure 8-figure supplement 11  
TPS
