# Supplementary material for: Mitochondrial protein import clogging as a mechanism of disease
Source: eLife journal article supplement (doi:10.7554/elife.84330), 2023-05-02
Supplement: fig8-figsupp2-data2 [file Figure 8-figure supplement 2-source data annotated.pdf › Figure 8-figure supplement 2-source data 1/Figure 8-figure supplement 2-source data annotated.pdf]

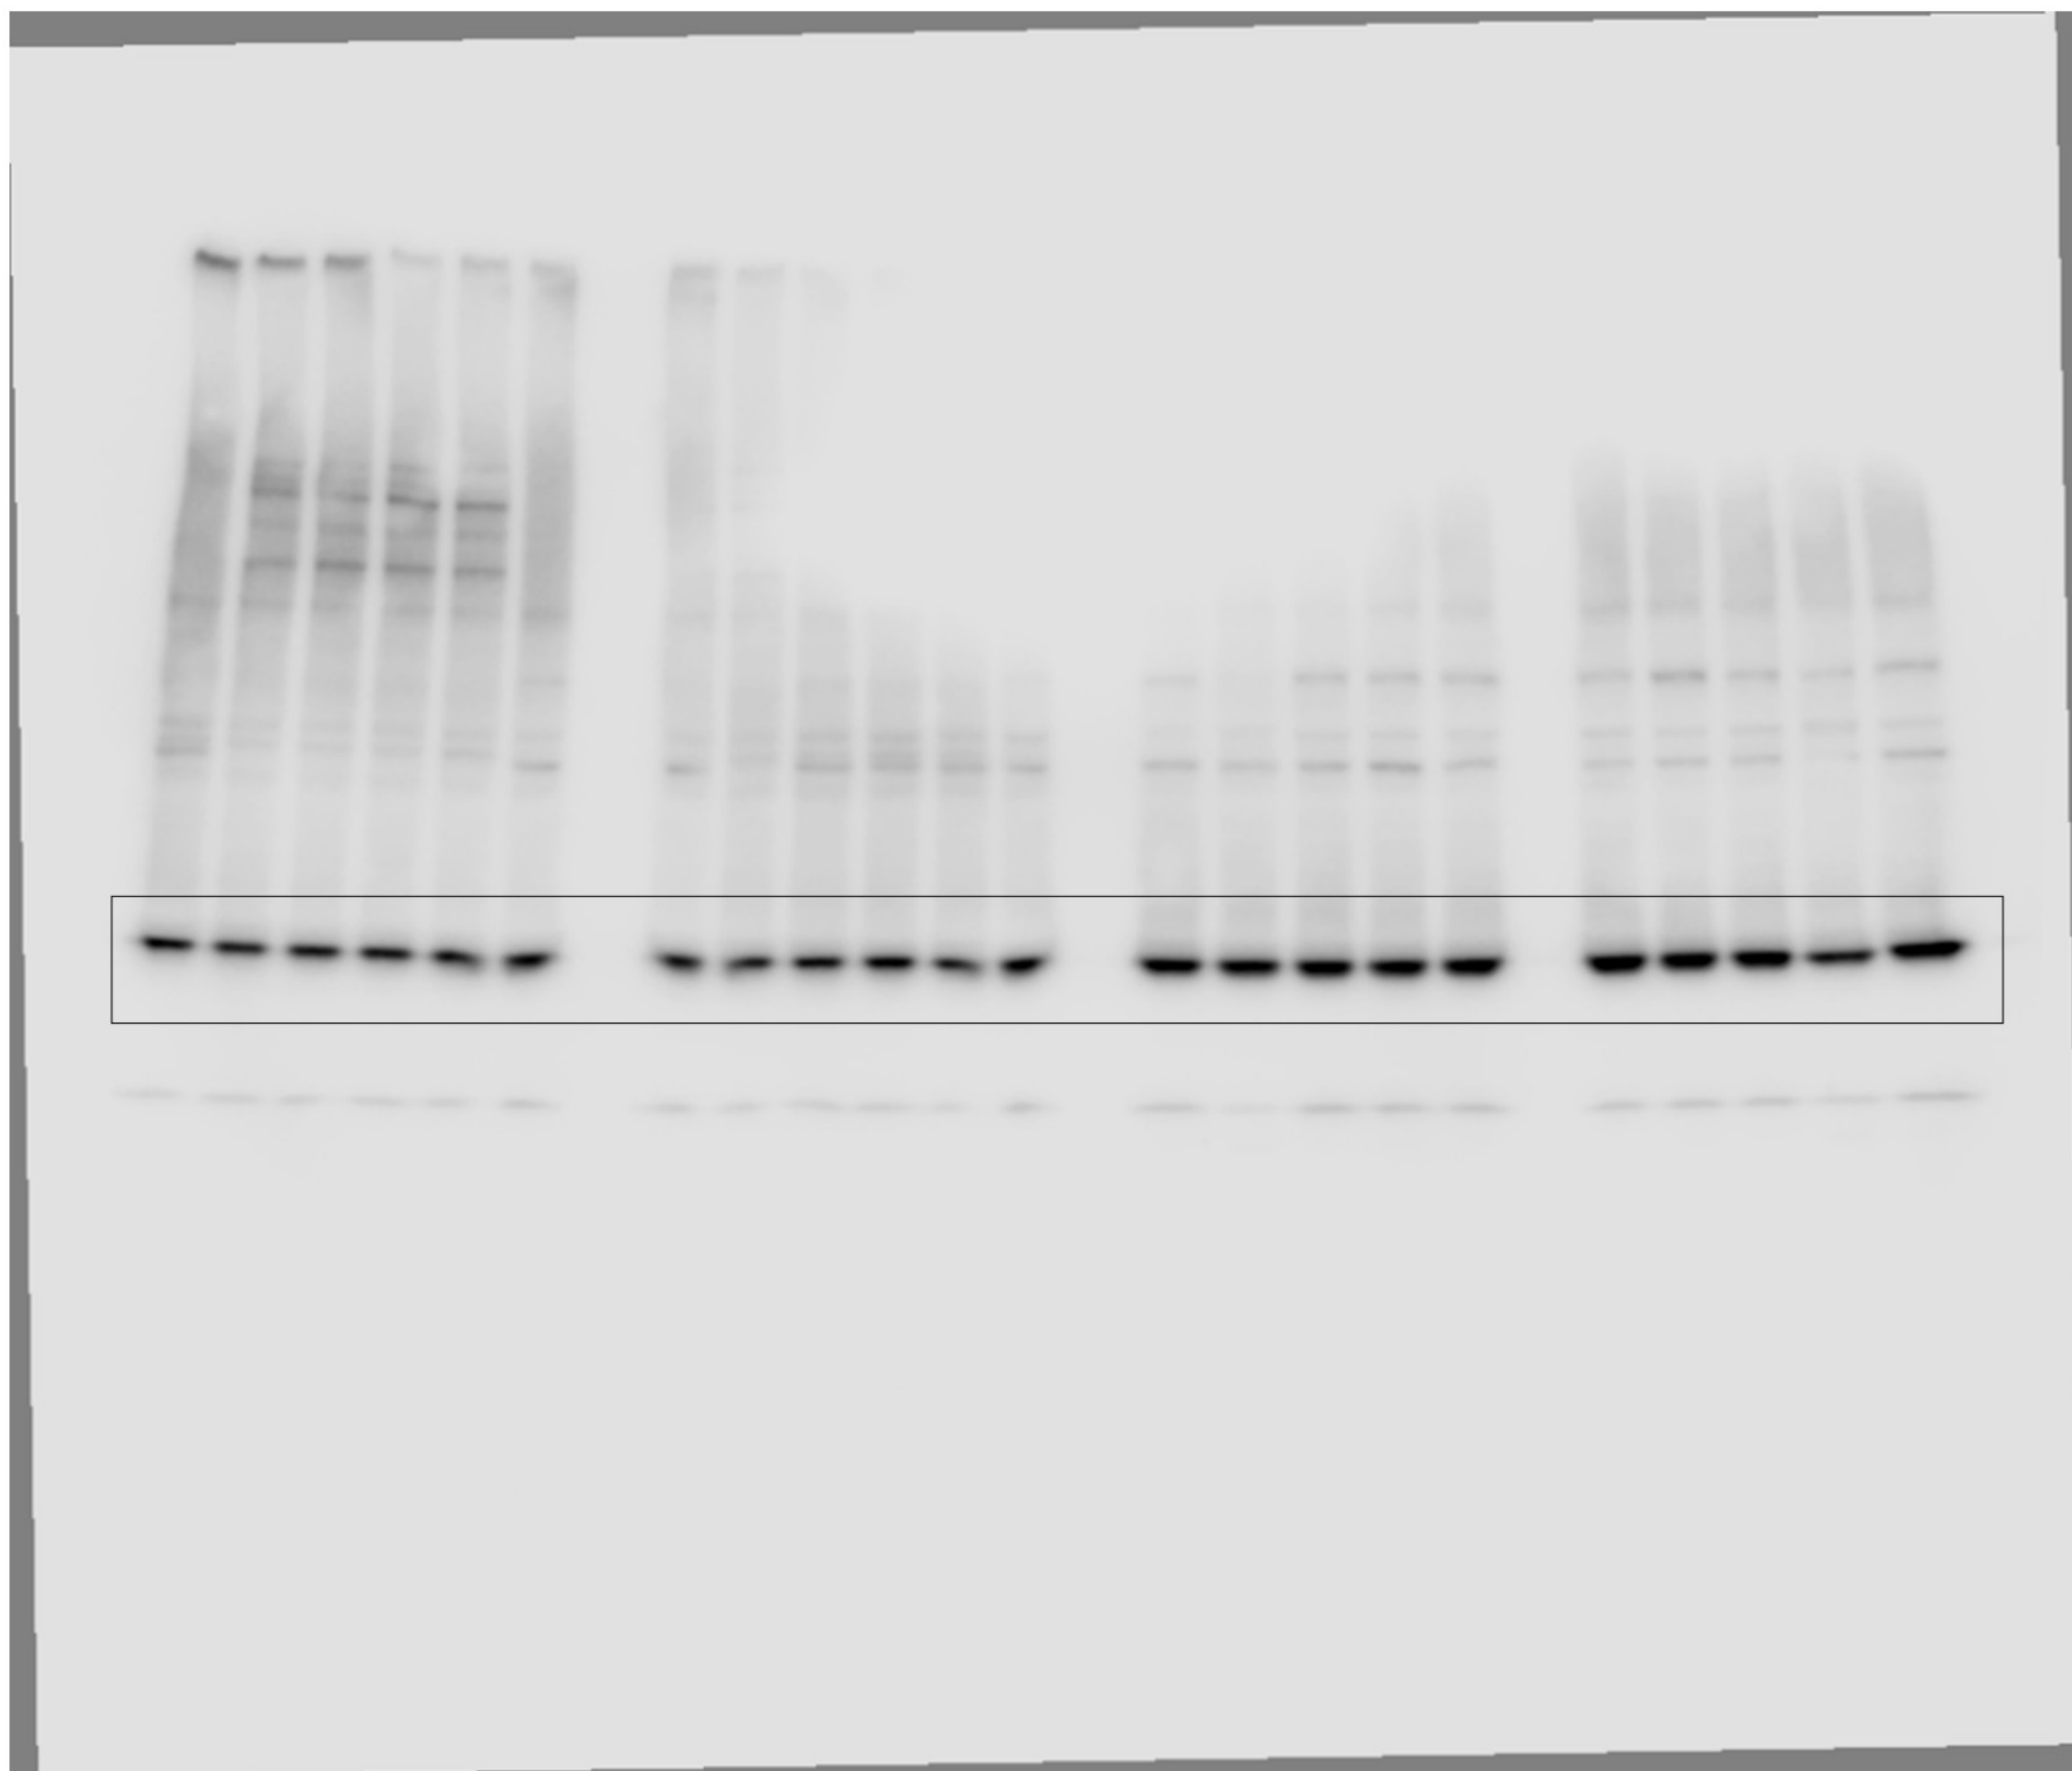

Cropped area for Figure 8-figure supplement 2A  
eIF2alpha

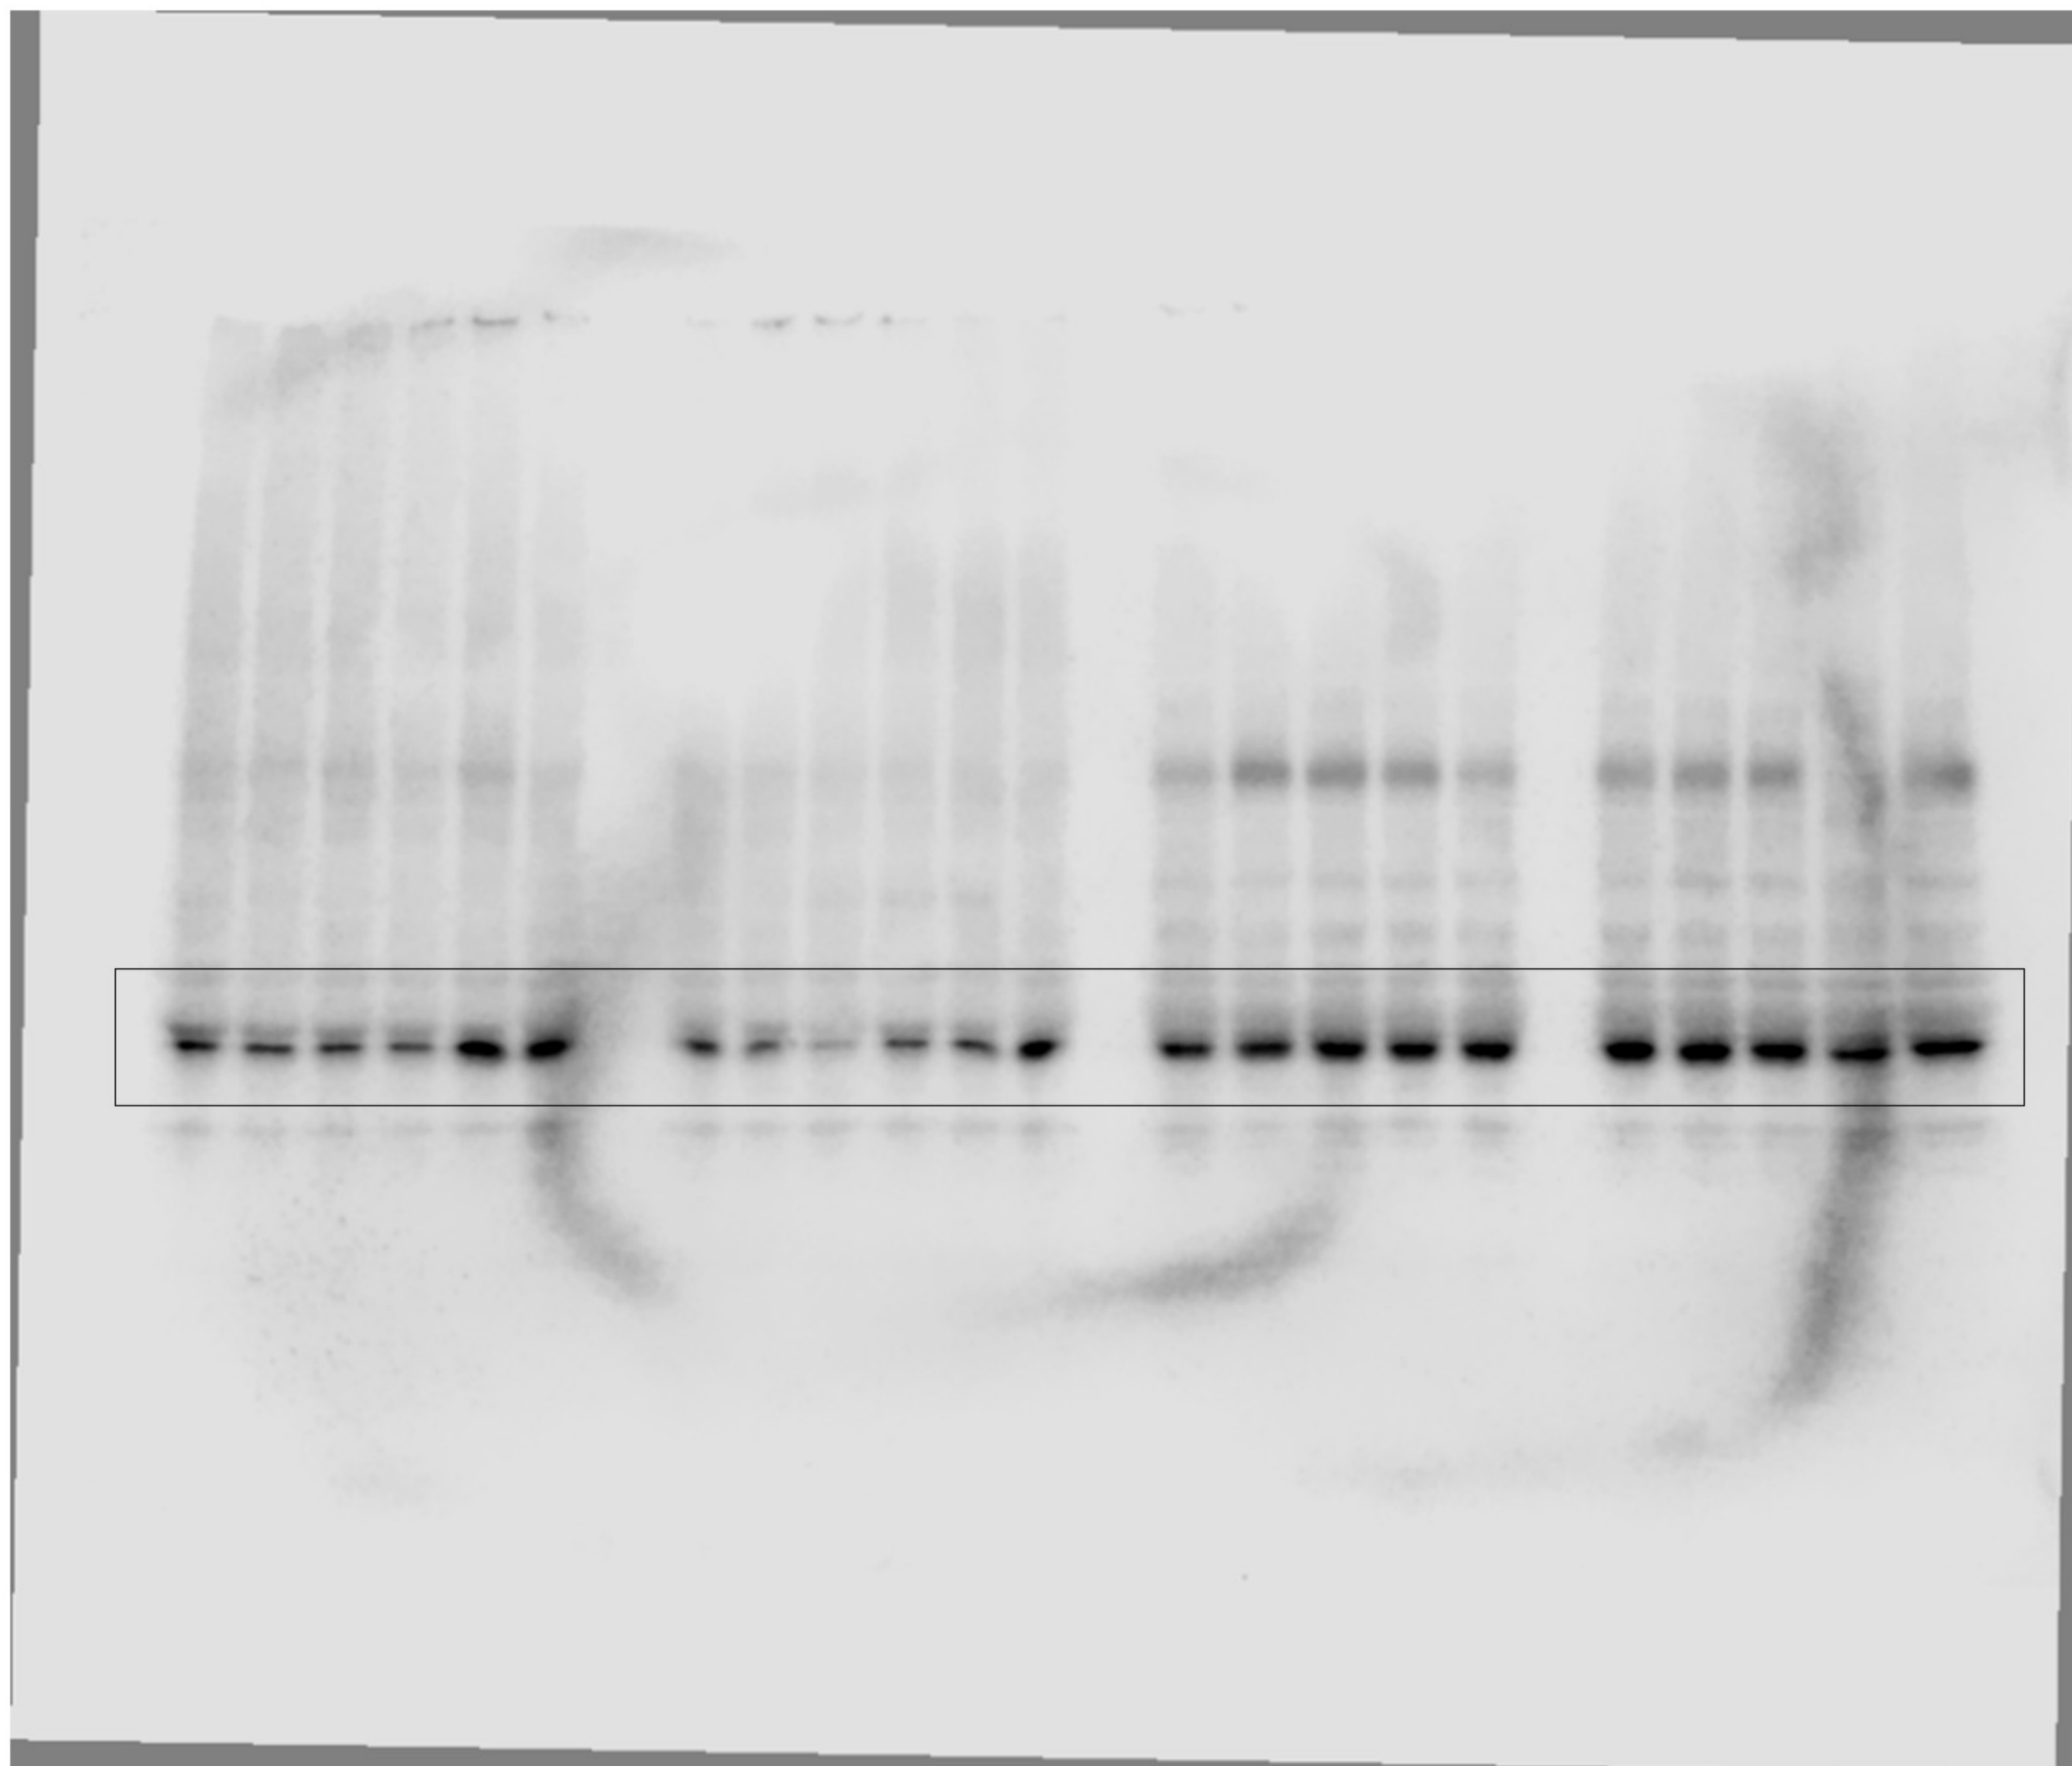

Cropped area for Figure 8-figure supplement 2A  
phospho-eIF2alpha

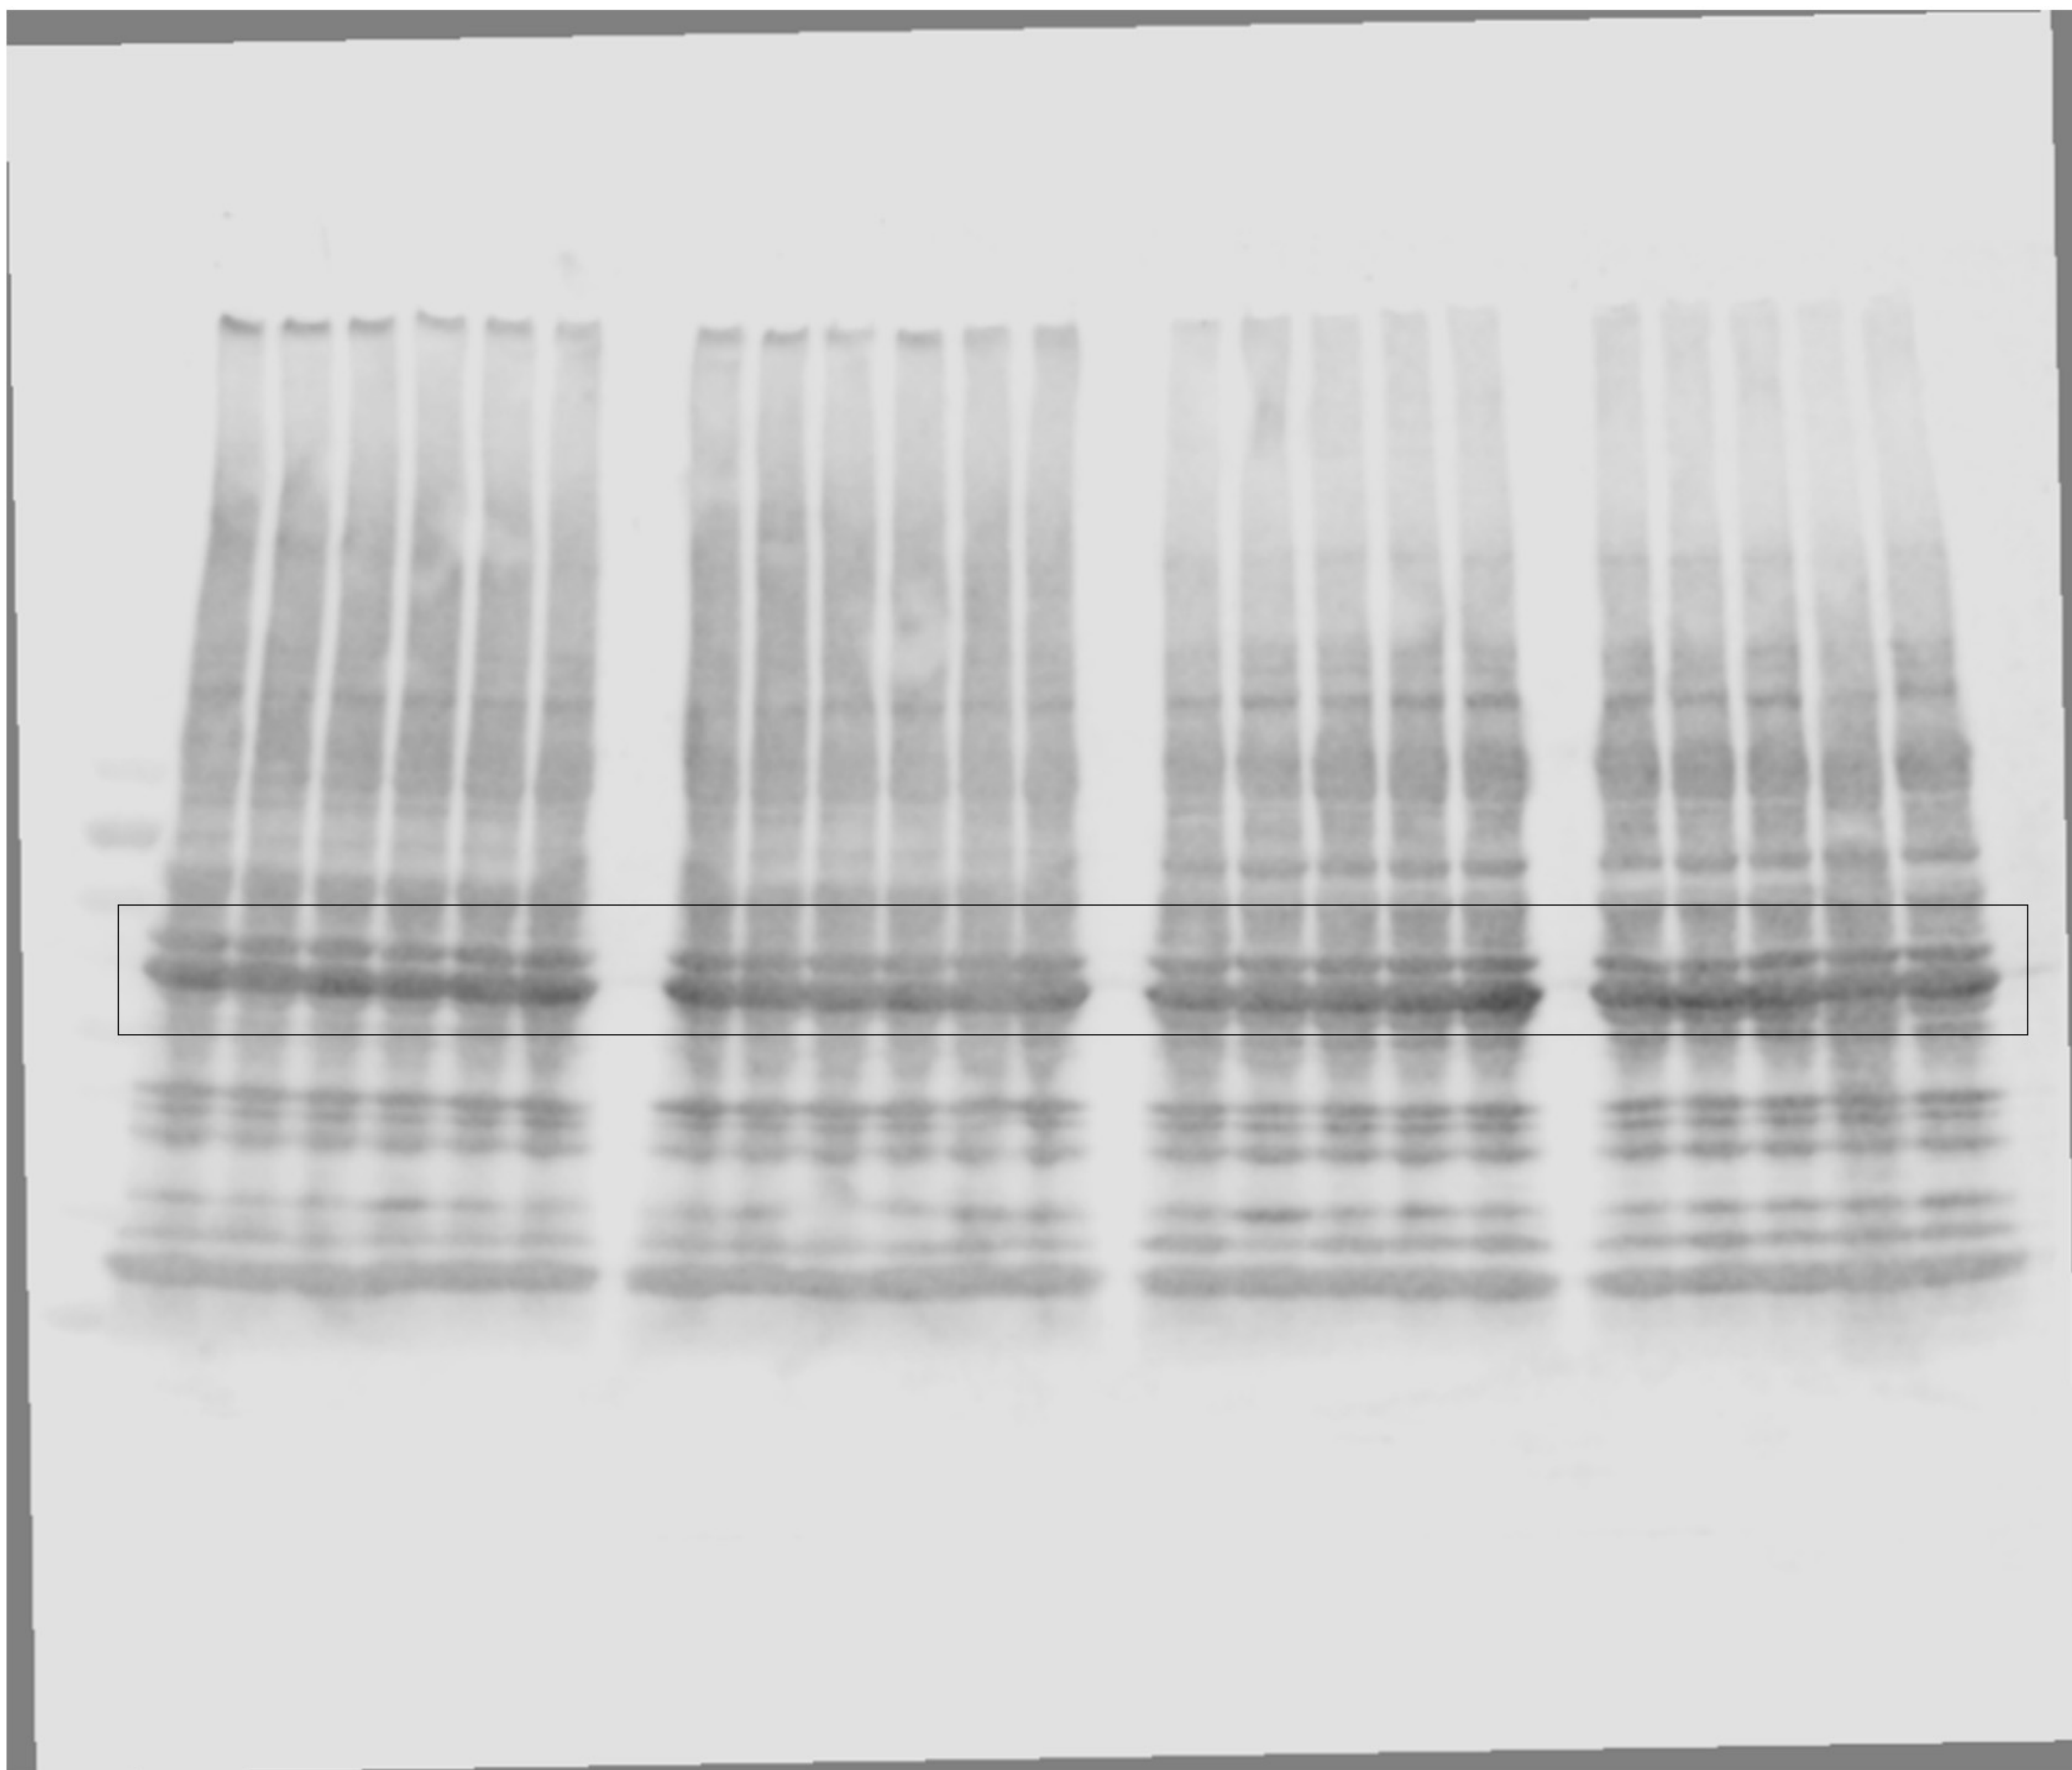

Cropped area for Figure 8-figure supplement 2A  
Total protein stain\_bottom

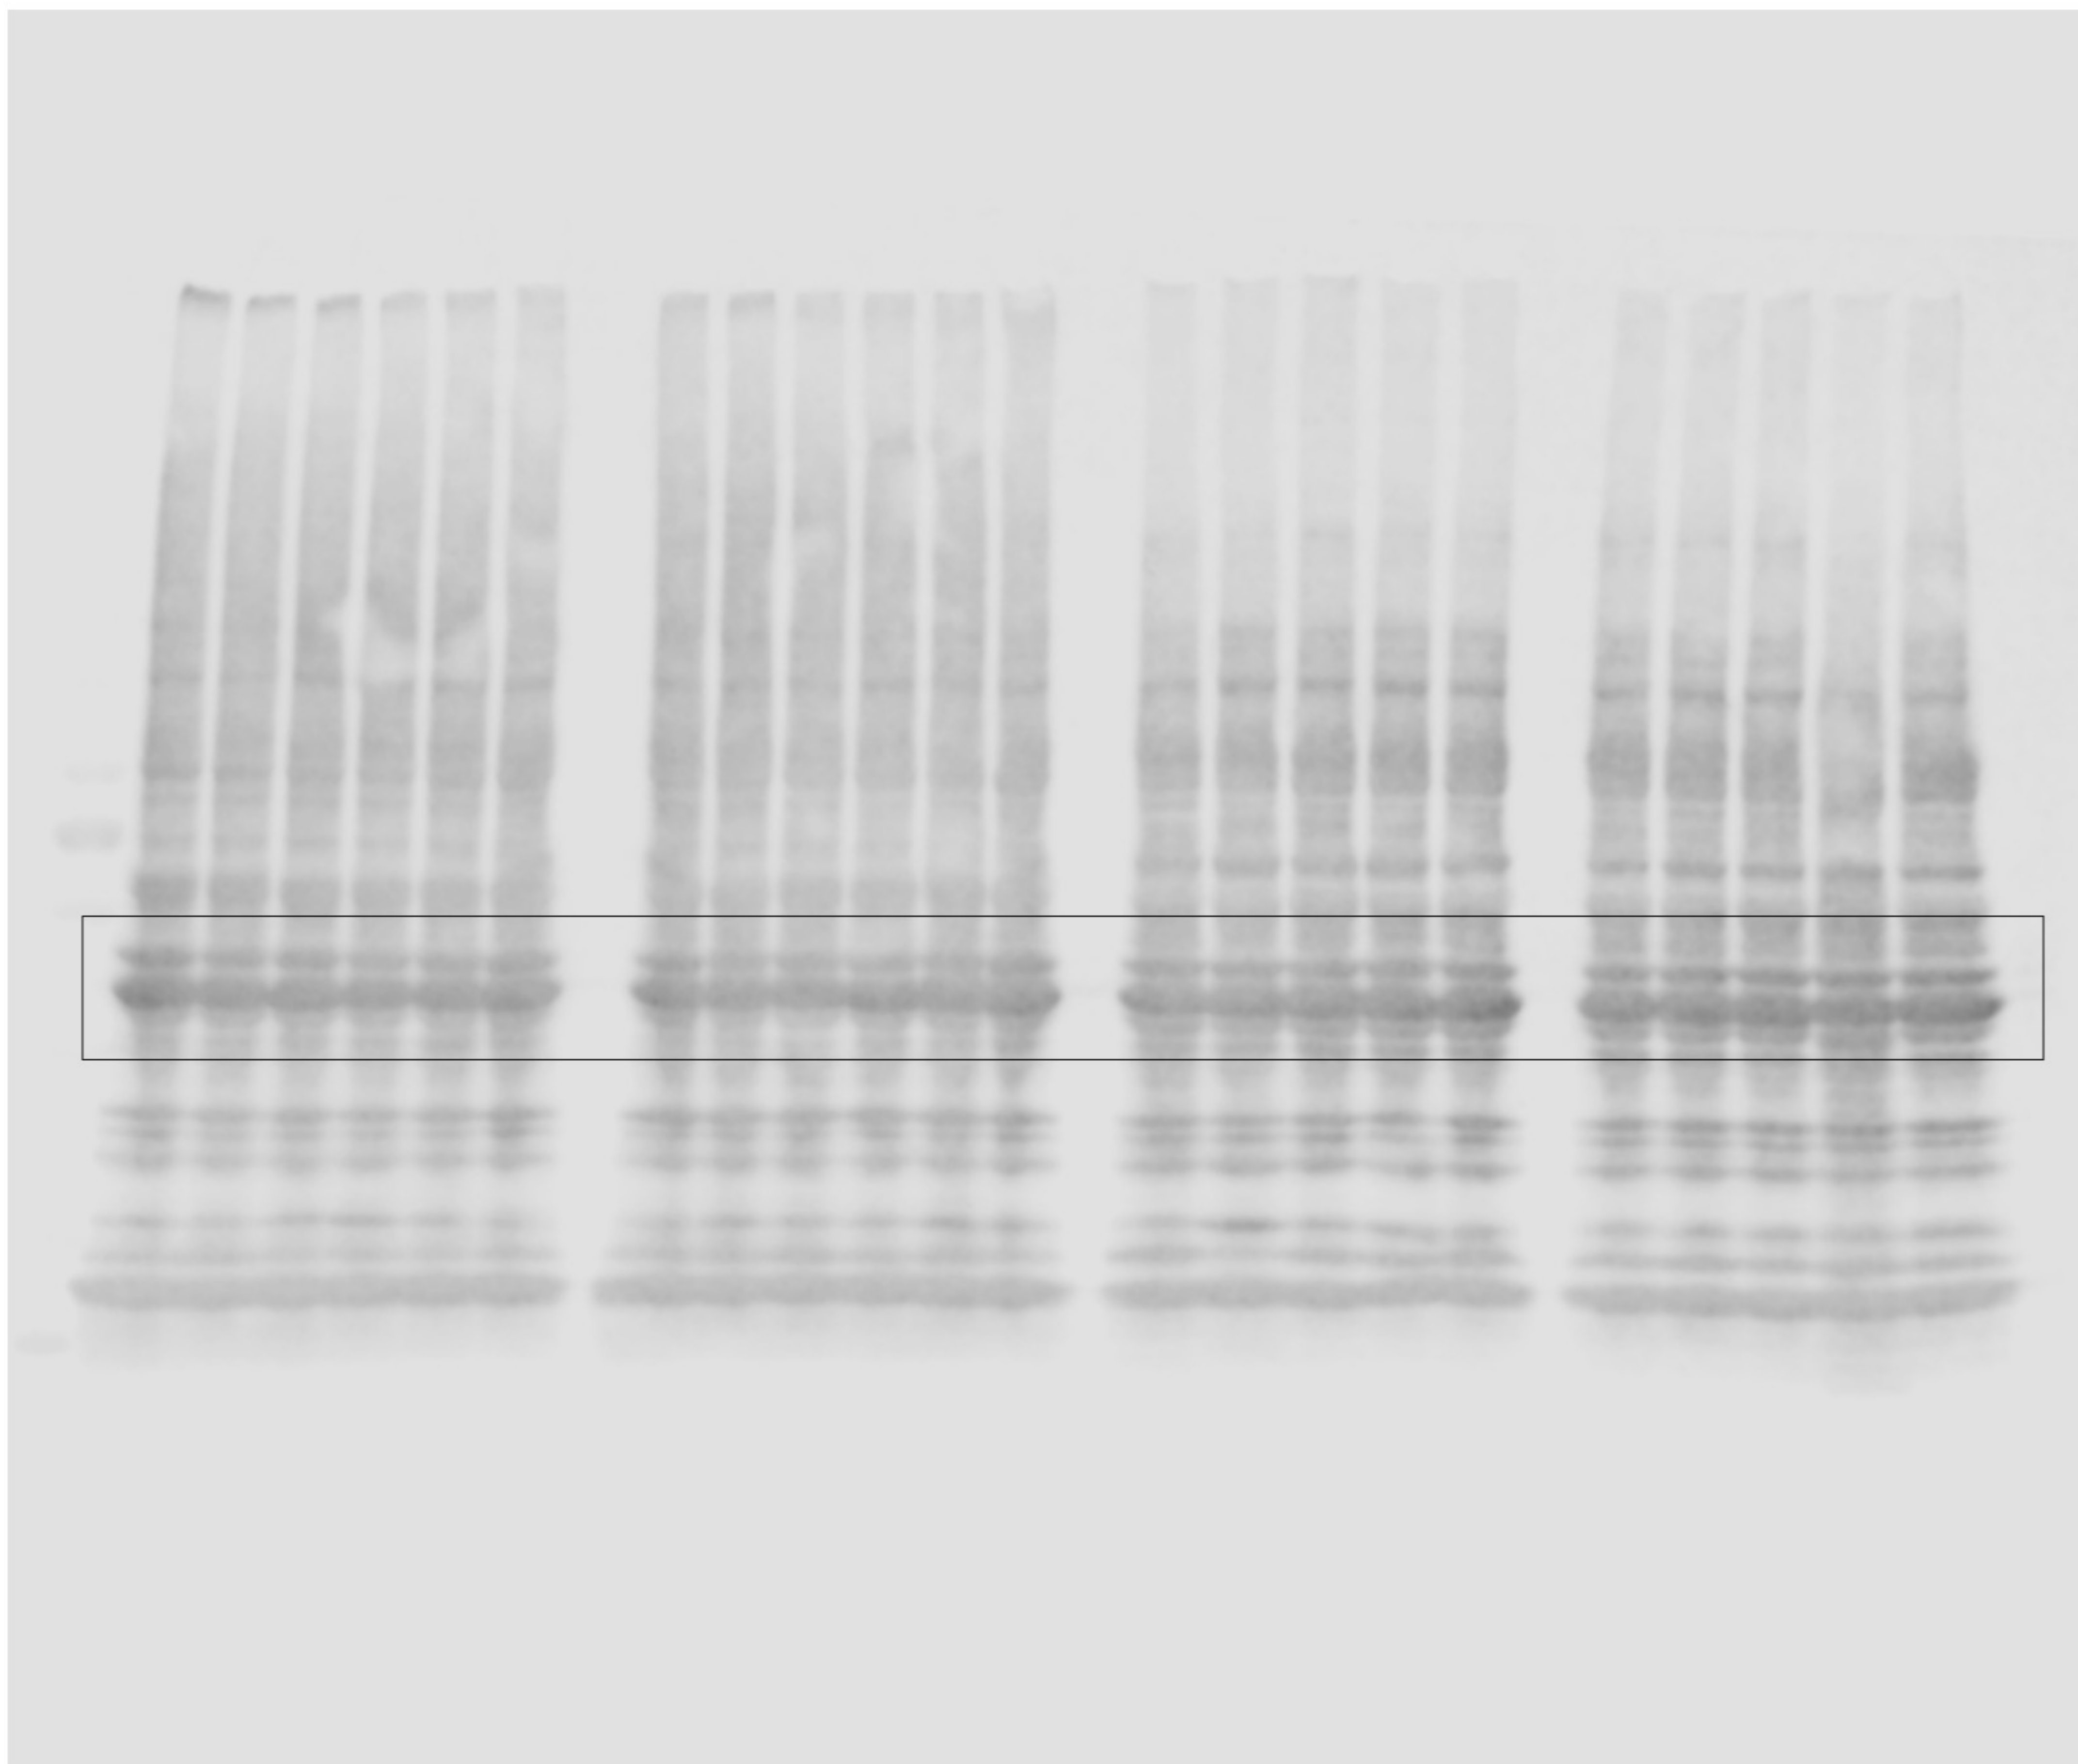

Cropped area for Figure 8-figure supplement 2A  
Total protein stain\_top
