# Supplementary material for: Mitochondrial protein import clogging as a mechanism of disease
Source: eLife. 2023 May 2;12:e84330. doi: 10.7554/eLife.84330 (PMC10208645; doi:10.7554/eLife.84330)
Supplement: Figure 4—figure supplement 2—source data 1. [file elife-84330-fig4-figsupp2-data1.xlsx]

## Sheet: Sheet1
	FC	log2(FC)	p.ajusted	#NAME?
EDC3	12.442	3.6371	0.028836	1.5401
CKA1	11.086	3.4707	0.028429	1.5462
CKA2	9.1621	3.1957	0.010156	1.9933
LSM1	8.2371	3.0421	0.022326	1.6512
NAB2	7.7946	2.9625	0.019533	1.7092
LSM5	7.7132	2.9473	0.0084245	2.0745
SDS22	7.5558	2.9176	0.017772	1.7503
DCP2	7.4679	2.9007	0.035991	1.4438
DIG1	7.2894	2.8658	0.016922	1.7716
NSE5	6.6225	2.7274	0.013001	1.886
PBY1	6.5235	2.7056	0.037645	1.4243
PDR5	6.4308	2.685	0.02175	1.6625
PAT1	6.3981	2.6776	0.025186	1.5988
CDC39	6.3196	2.6598	0.031543	1.5011
CKB1	6.2747	2.6495	0.030746	1.5122
RTT103	6.076	2.6031	0.015215	1.8177
YSC84	5.9017	2.5611	0.022866	1.6408
DIG2	5.8257	2.5424	0.0028974	2.538
MMF1	5.7987	2.5357	0.0012015	2.9203
UTP8	5.7633	2.5269	0.043533	1.3612
RPL25	5.5865	2.4819	0.029008	1.5375
PSP2	5.4974	2.4588	0.015888	1.7989
RET2	5.4773	2.4535	0.028812	1.5404
UTP20	5.3156	2.4102	0.023699	1.6253
SAS5	5.258	2.3945	0.0084245	2.0745
RPL26B	5.1415	2.3622	0.029957	1.5235
UTP10	5.1379	2.3612	0.040013	1.3978
RPO21	5.0937	2.3487	0.047326	1.3249
HDA1	5.0635	2.3401	0.024767	1.6061
LSM4	5.0371	2.3326	0.021262	1.6724
RPL7B	5.0022	2.3225	0.028785	1.5408
HDA3	4.9829	2.317	0.03082	1.5112
CUE4	4.9629	2.3112	0.027049	1.5678
ALG12	4.9599	2.3103	0.010546	1.9769
EPS1	4.8971	2.2919	0.03891	1.4099
RPL33B	4.8947	2.2912	0.030603	1.5142
TIF35	4.8565	2.2799	0.013001	1.886
NUP84	4.7958	2.2618	0.020666	1.6847
SET3	4.7924	2.2607	0.032628	1.4864
LSM6	4.739	2.2446	0.016922	1.7716
CAF40	4.6995	2.2325	0.017772	1.7503
TRS120	4.6938	2.2308	0.029984	1.5231
RPL6A	4.6376	2.2134	0.032628	1.4864
FAD1	4.6205	2.2081	0.019692	1.7057
CAR2	4.6183	2.2074	0.016922	1.7716
NAB3	4.6081	2.2042	0.028785	1.5408
SEY1	4.5977	2.2009	0.015863	1.7996
SAC3	4.5443	2.1841	0.021818	1.6612
EAP1	4.5146	2.1746	0.010546	1.9769
UTP5	4.5131	2.1741	0.028812	1.5404
SEH1	4.4884	2.1662	0.029474	1.5306
RPL17B	4.4343	2.1487	0.022053	1.6565
HAP1	4.4327	2.1482	0.0016502	2.7825
RPL30	4.427	2.1463	0.028255	1.5489
SNT1	4.4247	2.1456	0.035144	1.4542
HSL7	4.4102	2.1409	0.027011	1.5685
POP2	4.3999	2.1375	0.037421	1.4269
EUG1	4.3856	2.1328	0.0085415	2.0685
YDR476C	4.3833	2.132	0.0011412	2.9426
PUF6	4.3648	2.1259	0.032416	1.4892
LSM7	4.3512	2.1214	0.028311	1.548
ARO1	4.32	2.111	0.033572	1.474
DBP5	4.3062	2.1064	0.04958	1.3047
MSH6	4.3013	2.1048	0.018378	1.7357
SIF2	4.2882	2.1004	0.044113	1.3554
SEC13	4.2878	2.1002	0.035144	1.4542
RPL14A	4.2875	2.1001	0.032023	1.4945
RPL16A	4.2837	2.0989	0.03444	1.4629
PHO2	4.2759	2.0962	0.0020954	2.6787
TBF1	4.2563	2.0896	0.010156	1.9933
SBP1	4.2249	2.0789	0.015215	1.8177
RPL21A	4.2243	2.0787	0.031071	1.5076
SPT8	4.2203	2.0773	0.010546	1.9769
YAF9	4.1974	2.0695	0.014632	1.8347
TRS23	4.1751	2.0618	0.02661	1.575
YMR102C	4.1749	2.0617	0.0051821	2.2855
SEC21	4.1679	2.0593	0.016419	1.7847
NUP85	4.1525	2.054	0.027011	1.5685
HSP82	4.1138	2.0405	0.039827	1.3998
STE13	4.1101	2.0392	0.018418	1.7348
IRR1	4.0895	2.0319	0.032104	1.4934
ATX2	4.072	2.0257	0.031859	1.4968
YET3	4.0655	2.0234	0.049742	1.3033
RPP2B	4.0588	2.0211	0.0028095	2.5514
MCM6	4.0565	2.0202	0.028785	1.5408
TAF8	4.0538	2.0193	0.034318	1.4645
NOP1	4.041	2.0147	0.042538	1.3712
RPL8A	4.04	2.0144	0.037067	1.431
IMD3	4.0124	2.0045	0.022326	1.6512
NFT1	3.9949	1.9982	0.012403	1.9065
RPL16B	3.9801	1.9928	0.03387	1.4702
SSE1	3.9565	1.9842	0.00322	2.4921
IMD2	3.9498	1.9818	0.02121	1.6735
DEF1	3.949	1.9815	0.016922	1.7716
TIF4632	3.945	1.98	0.028812	1.5404
RPL4A	3.9289	1.9741	0.028429	1.5462
YKT6	3.9288	1.9741	0.018418	1.7348
THP1	3.9216	1.9715	0.044657	1.3501
MAP1	3.9211	1.9713	0.028429	1.5462
MSH3	3.9117	1.9678	0.028812	1.5404
RRP5	3.8769	1.9549	0.029706	1.5271
CEG1	3.8695	1.9521	0.0099141	2.0037
SSA1	3.8665	1.951	0.012403	1.9065
RPL34B	3.8663	1.951	0.033471	1.4753
RPL10	3.8526	1.9458	0.031454	1.5023
RPL36B	3.8437	1.9425	0.021262	1.6724
RPS14B	3.8327	1.9383	0.035991	1.4438
DHH1	3.8324	1.9382	0.023699	1.6253
YCR061W	3.8306	1.9376	0.049742	1.3033
PUF3	3.8055	1.9281	0.031454	1.5023
CBP6	3.8051	1.9279	0.0084245	2.0745
CBF1	3.8001	1.926	0.0078588	2.1046
RPL31B	3.7992	1.9257	0.028707	1.542
SEC26	3.7738	1.916	0.014644	1.8344
PNT1	3.7734	1.9159	0.0028243	2.5491
SSE2	3.7657	1.9129	0.0027713	2.5573
NPL3	3.7544	1.9086	0.017822	1.749
RPP1B	3.7309	1.8995	0.0013452	2.8712
RPS26A	3.7137	1.8929	0.028311	1.548
PDS5	3.7136	1.8928	0.022326	1.6512
GPI11	3.6982	1.8868	0.014936	1.8258
RPL27A	3.6766	1.8784	0.03425	1.4653
YNR021W	3.6749	1.8777	0.03632	1.4399
VMA1	3.6658	1.8741	0.013383	1.8734
ABF1	3.6571	1.8707	0.013875	1.8578
HTB2	3.6495	1.8677	0.020717	1.6837
NAN1	3.6495	1.8677	0.028812	1.5404
PMT4	3.647	1.8667	0.02992	1.524
HDA2	3.6452	1.866	0.012935	1.8882
SMD3	3.6422	1.8648	0.013001	1.886
GUS1	3.636	1.8624	0.013429	1.872
ENV9	3.6124	1.853	0.042746	1.3691
NUP133	3.6039	1.8495	0.026611	1.5749
BMH1	3.595	1.846	0.0084245	2.0745
OAF1	3.5944	1.8457	0.016922	1.7716
RPL28	3.5893	1.8437	0.027011	1.5685
GPI8	3.5887	1.8435	0.0036769	2.4345
UBR1	3.5887	1.8434	0.026059	1.584
YPR097W	3.5748	1.8379	0.010864	1.964
RPL17A	3.5629	1.833	0.026087	1.5836
GND1	3.5595	1.8317	0.0080667	2.0933
RPA34	3.5505	1.828	0.01422	1.8471
CTR9	3.5458	1.8261	0.022326	1.6512
TRS130	3.5246	1.8175	0.012935	1.8882
RPC40	3.5242	1.8173	0.015863	1.7996
MRD1	3.5209	1.8159	0.018846	1.7248
NUP145	3.5161	1.814	0.026588	1.5753
TAF4	3.5145	1.8133	0.03082	1.5112
RPL11A	3.5134	1.8129	0.028311	1.548
CDC53	3.5133	1.8128	0.02272	1.6436
RPL13B	3.5075	1.8104	0.023767	1.624
SEC27	3.5014	1.8079	0.014658	1.8339
ISC1	3.4982	1.8066	0.036167	1.4417
NUP120	3.4963	1.8058	0.028785	1.5408
RPL31A	3.4961	1.8058	0.013578	1.8672
RPL32	3.4867	1.8019	0.015863	1.7996
RPL6B	3.4852	1.8013	0.030603	1.5142
PDC2	3.4685	1.7943	0.027011	1.5685
NUT1	3.4683	1.7942	0.0084245	2.0745
TRS31	3.4656	1.7931	0.0086442	2.0633
CPR1	3.4642	1.7925	0.0028095	2.5514
RPL3	3.4568	1.7894	0.036476	1.438
TRS33	3.4559	1.7891	0.02458	1.6094
SEC23	3.446	1.7849	0.022326	1.6512
RAD1	3.4452	1.7846	0.023651	1.6261
TMA108	3.4259	1.7765	0.016922	1.7716
SOP4	3.4199	1.774	0.043133	1.3652
KEL1	3.4081	1.769	0.02175	1.6625
PDR1	3.3956	1.7637	0.013734	1.8622
YEF3	3.3883	1.7605	0.02992	1.524
SGV1	3.3785	1.7564	0.0061835	2.2088
LCL2	3.3603	1.7486	0.026671	1.574
TAF7	3.3587	1.7479	0.035238	1.453
SPT6	3.3555	1.7465	0.021262	1.6724
MSH2	3.3534	1.7456	0.021262	1.6724
RSC2	3.345	1.742	0.0011412	2.9426
OST5	3.3417	1.7406	0.037421	1.4269
COP1	3.321	1.7316	0.025839	1.5877
TAF1	3.3132	1.7282	0.048025	1.3185
HSE1	3.3048	1.7246	0.021818	1.6612
TAF6	3.2994	1.7222	0.01902	1.7208
TCP1	3.2972	1.7212	0.018094	1.7425
PRP43	3.2868	1.7167	0.028707	1.542
APL2	3.2863	1.7164	0.032104	1.4934
RPL5	3.2791	1.7133	0.030712	1.5127
RAT1	3.2755	1.7117	0.012552	1.9013
AVT4	3.2735	1.7108	0.046008	1.3372
CDC33	3.2681	1.7085	0.030603	1.5142
GPI12	3.2663	1.7077	0.021262	1.6724
ALG2	3.2553	1.7028	0.031543	1.5011
RAP1	3.2529	1.7017	0.021262	1.6724
GCD11	3.246	1.6987	0.049319	1.307
GCN1	3.2452	1.6983	0.015271	1.8161
SRP54	3.2428	1.6972	0.027011	1.5685
RPL9A	3.2419	1.6968	0.02661	1.575
SUB2	3.2261	1.6898	0.013475	1.8705
RVB2	3.2248	1.6892	0.028311	1.548
OLA1	3.2225	1.6882	0.021262	1.6724
RPD3	3.2179	1.6861	0.02992	1.524
ARP4	3.2176	1.686	0.038414	1.4155
VID22	3.213	1.6839	0.024192	1.6163
SHE10	3.2108	1.6829	0.015908	1.7984
APL4	3.2095	1.6824	0.029084	1.5363
SED4	3.2074	1.6814	0.040071	1.3972
RSC9	3.206	1.6808	0.0053309	2.2732
TRA1	3.2041	1.6799	0.016922	1.7716
YOR283W	3.2038	1.6798	0.019016	1.7209
GAA1	3.1953	1.676	0.013001	1.886
YGL101W	3.1879	1.6726	0.034296	1.4648
SIN3	3.1806	1.6693	0.028812	1.5404
TUB2	3.1717	1.6653	0.031859	1.4968
TAF12	3.1712	1.665	0.0084245	2.0745
SSD1	3.1686	1.6638	0.012721	1.8955
PBN1	3.1667	1.663	0.016922	1.7716
CPD1	3.1663	1.6628	0.019692	1.7057
TAF5	3.1615	1.6606	0.025885	1.587
IXR1	3.1586	1.6593	0.030893	1.5101
STE24	3.1582	1.6591	0.0020954	2.6787
DEP1	3.1582	1.6591	0.013299	1.8762
GTB1	3.1543	1.6573	0.015908	1.7984
PGK1	3.1515	1.656	0.011171	1.9519
HFI1	3.1504	1.6555	0.015905	1.7985
ADA2	3.1448	1.653	0.0020954	2.6787
NMD3	3.1434	1.6523	0.028812	1.5404
RPP0	3.1428	1.652	0.027646	1.5584
SAC6	3.1344	1.6482	0.040071	1.3972
ALG9	3.1299	1.6461	0.019143	1.718
HYP2	3.113	1.6383	0.012292	1.9104
HIR1	3.1127	1.6381	0.030347	1.5179
EAF7	3.0994	1.632	0.016574	1.7806
SEC24	3.099	1.6318	0.029935	1.5238
RSC4	3.0986	1.6316	0.016922	1.7716
SSZ1	3.0961	1.6304	0.0084245	2.0745
CLU1	3.0943	1.6296	0.0019218	2.7163
RAD50	3.0906	1.6279	0.043075	1.3658
UBC7	3.0881	1.6267	0.0084245	2.0745
TAF3	3.0874	1.6264	0.01975	1.7044
PHO23	3.0836	1.6246	0.026098	1.5834
ALE1	3.0759	1.621	0.010546	1.9769
SSH1	3.0727	1.6195	0.0012015	2.9203
GPI16	3.0714	1.6189	0.01671	1.777
LCB5	3.0644	1.6156	0.015863	1.7996
NGG1	3.0606	1.6138	0.0011605	2.9354
SPT3	3.0581	1.6126	0.013475	1.8705
BGL2	3.0544	1.6109	0.0084245	2.0745
NUG1	3.0518	1.6097	0.0044843	2.3483
NEO1	3.044	1.606	0.028785	1.5408
XRN1	3.0399	1.604	0.012803	1.8927
PRI1	3.0375	1.6029	0.043533	1.3612
RPB2	3.0312	1.5999	0.022326	1.6512
SGF73	3.0311	1.5998	0.015215	1.8177
ERG1	3.0294	1.599	0.037888	1.4215
KRE33	3.0249	1.5969	0.047781	1.3207
GAB1	3.0207	1.5949	0.0028974	2.538
EOS1	3.0086	1.5891	0.031454	1.5023
APM1	3.0029	1.5864	0.014049	1.8524
SEC53	3.0011	1.5855	0.0026064	2.584
ATG20	2.9973	1.5836	0.022104	1.6555
TAF10	2.9898	1.58	0.0059058	2.2287
NAT1	2.9894	1.5798	0.023475	1.6294
PMT5	2.9851	1.5778	0.027011	1.5685
CST26	2.9742	1.5725	0.02175	1.6625
GSF2	2.974	1.5724	0.0089129	2.05
STH1	2.9731	1.572	0.0033861	2.4703
ARB1	2.9517	1.5616	0.035029	1.4556
SSB2	2.9432	1.5574	0.0099141	2.0037
POM33	2.9428	1.5572	0.019324	1.7139
ERG3	2.9423	1.5569	0.032104	1.4934
NSG1	2.9403	1.5559	0.019249	1.7156
MBP1	2.9397	1.5557	0.021262	1.6724
BMH2	2.9301	1.551	0.0044843	2.3483
ERG2	2.9301	1.551	0.042538	1.3712
GLE1	2.9255	1.5487	0.045425	1.3427
EAF3	2.9164	1.5442	0.012275	1.911
RSC30	2.9138	1.5429	0.0089129	2.05
RSC6	2.9118	1.5419	0.0020954	2.6787
SSB1	2.905	1.5385	0.0096491	2.0155
UBX4	2.9041	1.5381	0.031388	1.5032
ARE2	2.9039	1.538	0.0011412	2.9426
SPA2	2.9036	1.5378	0.041033	1.3869
BNI1	2.9018	1.5369	0.016115	1.7928
GPT2	2.8956	1.5339	0.021916	1.6592
RDL1	2.8938	1.5329	0.0228	1.6421
UFE1	2.8867	1.5294	0.036841	1.4337
MSN1	2.8846	1.5284	0.030456	1.5163
SSL1	2.8832	1.5276	0.049883	1.302
GPI17	2.879	1.5256	0.032628	1.4864
SEC22	2.8768	1.5244	0.017418	1.759
SFB2	2.8738	1.523	0.032023	1.4945
RPS13	2.868	1.52	0.044636	1.3503
ARO2	2.8626	1.5173	0.022781	1.6424
EMC1	2.8561	1.514	0.012721	1.8955
SCC2	2.8551	1.5135	0.049742	1.3033
SST2	2.8476	1.5098	0.0078588	2.1046
ARF1	2.8389	1.5053	0.044532	1.3513
VIP1	2.8377	1.5047	0.042538	1.3712
HTA1	2.834	1.5028	0.019249	1.7156
MCM1	2.833	1.5023	0.0011412	2.9426
SIR2	2.8264	1.499	0.015863	1.7996
ARP7	2.817	1.4942	0.0039547	2.4029
HSF1	2.8149	1.4931	0.0039547	2.4029
LRO1	2.8102	1.4907	0.0025723	2.5897
MSC2	2.8029	1.4869	0.02992	1.524
PHO87	2.8018	1.4863	0.0221	1.6556
RPS3	2.7981	1.4844	0.041531	1.3816
SUP45	2.7963	1.4835	0.027011	1.5685
ERG11	2.7922	1.4814	0.015908	1.7984
RCO1	2.791	1.4808	0.037908	1.4213
UBX2	2.7897	1.4801	0.026051	1.5842
YAP1802	2.7862	1.4783	0.015905	1.7985
ICE2	2.7844	1.4774	0.010546	1.9769
ARP9	2.784	1.4772	0.0044843	2.3483
TAF9	2.7757	1.4729	0.0086932	2.0608
LEM3	2.7746	1.4723	0.016922	1.7716
RSC3	2.7734	1.4716	0.013229	1.8785
ERG24	2.7722	1.471	0.013001	1.886
EAF5	2.7709	1.4703	0.029539	1.5296
BEM2	2.7667	1.4682	0.0035912	2.4448
MST28	2.7665	1.4681	0.0080667	2.0933
SLC1	2.7658	1.4677	0.0088708	2.052
EMC4	2.7526	1.4608	0.010546	1.9769
YGR026W	2.7516	1.4603	0.037908	1.4213
RSC58	2.7424	1.4555	0.0031761	2.4981
TRX2	2.7419	1.4552	0.016922	1.7716
YKL077W	2.7352	1.4517	0.03427	1.4651
DNF3	2.7325	1.4502	0.02992	1.524
DGA1	2.7307	1.4493	0.0026064	2.584
CWH41	2.7302	1.449	0.034693	1.4598
NPL6	2.7294	1.4486	0.010156	1.9933
PAB1	2.7189	1.443	0.015215	1.8177
TSC3	2.7063	1.4363	0.0084245	2.0745
HRD1	2.704	1.4351	0.0024262	2.6151
YHR097C	2.7029	1.4345	0.0039547	2.4029
DED1	2.6979	1.4318	0.024012	1.6196
GCV2	2.6924	1.4289	0.009448	2.0247
ERG26	2.6889	1.427	0.0090926	2.0413
ACT1	2.6772	1.4207	0.013001	1.886
PGA3	2.6723	1.4181	0.015908	1.7984
MHP1	2.6722	1.418	0.02412	1.6176
SCS2	2.6663	1.4149	0.01671	1.777
CYB5	2.6623	1.4127	0.0084245	2.0745
IRE1	2.6556	1.409	0.013001	1.886
SCT1	2.6551	1.4087	0.031543	1.5011
PMT2	2.6546	1.4085	0.018153	1.7411
ERG27	2.6444	1.403	0.016115	1.7928
ALG13	2.6404	1.4007	0.03018	1.5203
SFH1	2.6341	1.3973	0.0020954	2.6787
ECM14	2.6317	1.396	0.015215	1.8177
UME1	2.6304	1.3953	0.024514	1.6106
SEC20	2.6277	1.3938	0.012964	1.8872
TOM70	2.6275	1.3937	0.0086932	2.0608
MDH2	2.6195	1.3893	0.0019218	2.7163
YPT11	2.6184	1.3887	0.031918	1.496
SEC62	2.618	1.3885	0.02272	1.6436
ERG28	2.6138	1.3861	0.018094	1.7425
PEP4	2.6132	1.3858	0.0079256	2.101
OST2	2.6124	1.3854	0.025186	1.5988
SUM1	2.6096	1.3838	0.016011	1.7956
RSC8	2.6092	1.3836	0.0011412	2.9426
RPS0A	2.6073	1.3826	0.03102	1.5084
RVB1	2.6068	1.3823	0.013229	1.8785
EMC2	2.601	1.3791	0.013001	1.886
ADP1	2.5991	1.378	0.04826	1.3164
LCB1	2.5922	1.3742	0.0024262	2.6151
KTR3	2.5904	1.3732	0.027646	1.5584
ANP1	2.5843	1.3698	0.019249	1.7156
MNN11	2.5802	1.3675	0.0084245	2.0745
ERG9	2.5797	1.3672	0.015908	1.7984
STT3	2.578	1.3663	0.028255	1.5489
DST1	2.5627	1.3577	0.02272	1.6436
IFA38	2.5592	1.3557	0.019805	1.7032
CUE1	2.5576	1.3548	0.015215	1.8177
EMP24	2.5539	1.3527	0.010319	1.9864
TIP20	2.5503	1.3507	0.016573	1.7806
AHC1	2.548	1.3494	0.012388	1.907
GCN5	2.5441	1.3472	0.0064156	2.1928
MOB1	2.5408	1.3453	0.024767	1.6061
MON2	2.5407	1.3452	0.020059	1.6977
MNN9	2.5405	1.3451	0.021262	1.6724
PHO86	2.5391	1.3443	0.0015231	2.8173
YNL284C-B	2.5366	1.3429	0.016922	1.7716
NSG2	2.5341	1.3415	0.030347	1.5179
ISW2	2.5292	1.3387	0.029474	1.5306
PEX25	2.5282	1.3381	0.029384	1.5319
UNG1	2.5266	1.3372	0.01975	1.7044
ERP3	2.5253	1.3365	0.019533	1.7092
LCB2	2.521	1.334	0.0013452	2.8712
YGL140C	2.5175	1.332	0.040071	1.3972
HRP1	2.508	1.3265	0.0033861	2.4703
FAR8	2.5068	1.3258	0.012803	1.8927
UBX7	2.506	1.3254	0.015008	1.8237
ENV11	2.5047	1.3247	0.031071	1.5076
HOC1	2.4962	1.3197	0.01438	1.8422
HRD3	2.4907	1.3165	0.0079256	2.101
MTC4	2.4864	1.3141	0.012803	1.8927
GET3	2.4841	1.3127	0.029957	1.5235
RRB1	2.4816	1.3113	0.016385	1.7856
ATG26	2.4757	1.3079	0.021916	1.6592
CBF2	2.4747	1.3073	0.016922	1.7716
VBA4	2.4737	1.3067	0.037936	1.4209
YEL043W	2.4681	1.3034	0.0072424	2.1401
SPF1	2.4592	1.2982	0.014644	1.8344
PGC1	2.4533	1.2947	0.02458	1.6094
USE1	2.4531	1.2946	0.038818	1.411
ERG7	2.4519	1.2939	0.029957	1.5235
CBR1	2.4472	1.2911	0.0091425	2.0389
PDC1	2.4424	1.2883	0.021262	1.6724
NCP1	2.4338	1.2832	0.0045128	2.3456
SEC63	2.4299	1.2809	0.014632	1.8347
SIL1	2.4281	1.2798	0.0080667	2.0933
IST2	2.4213	1.2758	0.012721	1.8955
SBH1	2.4159	1.2725	0.012721	1.8955
SIZ1	2.414	1.2715	0.029957	1.5235
SSM4	2.4102	1.2692	0.031454	1.5023
KRE5	2.4071	1.2673	0.0036432	2.4385
BUD3	2.3889	1.2564	0.049742	1.3033
RGR1	2.3881	1.2559	0.030603	1.5142
SSN3	2.3818	1.252	0.0025723	2.5897
NUP60	2.3779	1.2497	0.0092021	2.0361
ATP17	2.3722	1.2462	0.016922	1.7716
SHR3	2.3657	1.2423	0.030603	1.5142
VMA2	2.3644	1.2414	0.043505	1.3615
YDJ1	2.3602	1.2389	0.013001	1.886
ERG4	2.3491	1.2321	0.044971	1.3471
SAC1	2.3412	1.2272	0.0084245	2.0745
OST1	2.3328	1.222	0.021262	1.6724
SEC39	2.3328	1.2221	0.021916	1.6592
ACC1	2.331	1.2209	0.033233	1.4784
DOP1	2.327	1.2184	0.029957	1.5235
YIF1	2.3177	1.2127	0.015888	1.7989
SCJ1	2.3149	1.211	0.0028973	2.538
YOS9	2.3135	1.2101	0.016969	1.7703
ROT2	2.3105	1.2082	0.0084245	2.0745
KAR2	2.3098	1.2078	0.0081572	2.0885
DPL1	2.3092	1.2074	0.013475	1.8705
MEC1	2.3057	1.2052	0.043571	1.3608
TUM1	2.3031	1.2036	0.016922	1.7716
PEX15	2.3003	1.2018	0.012552	1.9013
MSC7	2.2958	1.199	0.028836	1.5401
STP3	2.2921	1.1967	0.015908	1.7984
ERJ5	2.2917	1.1964	0.038465	1.4149
MDH3	2.282	1.1903	0.016385	1.7856
VPS70	2.2751	1.1859	0.015271	1.8161
YET1	2.2739	1.1852	0.032508	1.488
APD1	2.2719	1.1839	0.022326	1.6512
SRP101	2.2711	1.1834	0.012721	1.8955
SRP102	2.27	1.1827	0.0039547	2.4029
FAR11	2.2619	1.1776	0.012935	1.8882
FAA4	2.2589	1.1756	0.0053309	2.2732
IKS1	2.2556	1.1735	0.016922	1.7716
SHO1	2.2555	1.1735	0.044393	1.3527
RPO41	2.2503	1.1701	0.0094101	2.0264
GRX2	2.2459	1.1673	0.0094101	2.0264
PNC1	2.2365	1.1612	0.029537	1.5296
YRA1	2.225	1.1538	0.012721	1.8955
AIM6	2.2194	1.1501	0.046719	1.3305
WBP1	2.2142	1.1468	0.012721	1.8955
LDB7	2.2122	1.1455	0.0089129	2.05
NVJ2	2.2071	1.1421	0.01671	1.777
ARP2	2.1971	1.1356	0.024593	1.6092
ERV41	2.1949	1.1342	0.0096716	2.0145
ERP1	2.1912	1.1317	0.037922	1.4211
TCB2	2.1882	1.1298	0.035248	1.4529
OSH6	2.1864	1.1286	0.0092021	2.0361
STR3	2.179	1.1237	0.014936	1.8258
ATP23	2.1784	1.1233	0.015863	1.7996
MYO3	2.1762	1.1218	0.021916	1.6592
ITC1	2.1655	1.1147	0.024012	1.6196
SCS3	2.163	1.113	0.011472	1.9404
DPM1	2.1556	1.1081	0.0011412	2.9426
DDP1	2.1512	1.1052	0.04357	1.3608
TCB3	2.1464	1.1019	0.022146	1.6547
CPT1	2.1441	1.1004	0.015908	1.7984
GYP8	2.1192	1.0835	0.016388	1.7855
ERV25	2.1181	1.0828	0.026059	1.584
YAK1	2.1172	1.0821	0.040522	1.3923
PMT1	2.1064	1.0748	0.037853	1.4219
OSH3	2.0998	1.0703	0.012388	1.907
HLJ1	2.0872	1.0616	0.0093344	2.0299
GPD1	2.0861	1.0608	0.0031761	2.4981
ARC1	2.0843	1.0596	0.041013	1.3871
PHO84	2.0761	1.0539	0.021262	1.6724
CAF4	2.073	1.0517	0.01975	1.7044
TYW1	2.0623	1.0442	0.016388	1.7855
PAM17	2.059	1.0419	0.036631	1.4362
SRM1	2.0526	1.0375	0.0089129	2.05
NUM1	2.0522	1.0372	0.0020954	2.6787
GIN4	2.0477	1.034	0.0074088	2.1303
MOB2	2.0443	1.0316	0.0060114	2.221
INO80	2.0414	1.0295	0.0062307	2.2055
SKP1	2.0385	1.0275	0.0056978	2.2443
SCY1	2.038	1.0272	0.015863	1.7996
PEX8	2.0308	1.022	0.024743	1.6065
ERV46	2.0253	1.0182	0.028508	1.545
PDI1	2.0202	1.0145	0.01054	1.9772
ISU2	2.018	1.0129	0.0033861	2.4703
RTN1	2.0116	1.0083	0.015888	1.7989
YBL086C	1.9987	0.99905	0.012704	1.8961
PHB1	1.9974	0.99815	0.0068933	2.1616
TOS1	1.9943	0.99589	0.0020954	2.6787
NNF2	1.9868	0.99044	0.0020954	2.6787
GSP2	1.9799	0.98544	0.04826	1.3164
OST3	1.9753	0.98206	0.049821	1.3026
TCB1	1.9748	0.98168	0.04826	1.3164
RFC4	1.9689	0.97742	0.0084245	2.0745
VRG4	1.9687	0.97726	0.045452	1.3424
PTH2	1.9659	0.97516	0.0084245	2.0745
PEX30	1.9623	0.97256	0.028812	1.5404
IMP4	1.9609	0.97155	0.021818	1.6612
PHB2	1.956	0.96789	0.0089129	2.05
PHO4	1.9439	0.95892	0.0035912	2.4448
RFC5	1.9283	0.94733	0.010534	1.9774
TOM22	1.9178	0.93948	0.0082759	2.0822
YPL247C	1.9078	0.93189	0.049378	1.3065
UBC6	1.9006	0.92645	0.034923	1.4569
RPL36A	1.8872	0.91624	0.015863	1.7996
DOT5	1.8798	0.91056	0.0015231	2.8173
RFC2	1.8745	0.90652	0.035248	1.4529
MIA40	1.8622	0.89701	0.016969	1.7703
CYC3	1.8601	0.89541	0.015863	1.7996
ROD1	1.8586	0.89423	0.044532	1.3513
CYT2	1.8427	0.88184	0.0096491	2.0155
TOM40	1.8284	0.87058	0.042322	1.3734
PAM16	1.8269	0.86936	0.019249	1.7156
PEX32	1.8251	0.86796	0.044532	1.3513
JEM1	1.8249	0.86785	0.0082759	2.0822
RIM1	1.8021	0.84965	0.0013452	2.8712
IPI3	1.7788	0.83089	0.034196	1.466
RPS31	1.7688	0.82276	0.030601	1.5143
PUF4	1.7562	0.81249	0.031071	1.5076
LPD1	1.7507	0.80795	0.011812	1.9277
YNL234W	1.7446	0.80286	0.02121	1.6735
SAM50	1.7233	0.78519	0.016606	1.7797
ZIM17	1.7084	0.77265	0.010156	1.9933
TOM71	1.6885	0.75577	0.044845	1.3483
RFC3	1.6699	0.73976	0.0089129	2.05
MTO1	1.6662	0.73655	0.02175	1.6625
CHO2	1.6452	0.71823	0.02175	1.6625
YLR283W	1.6444	0.71758	0.028311	1.548
MSW1	1.6001	0.67817	0.0039547	2.4029
RFC1	1.5684	0.6493	0.026087	1.5836
GCV1	1.524	0.60789	0.043965	1.3569
