# Supplementary material for: Mitochondrial protein import clogging as a mechanism of disease
Source: eLife. 2023 May 2;12:e84330. doi: 10.7554/eLife.84330 (PMC10208645; doi:10.7554/eLife.84330)
Supplement: Figure 8—figure supplement 1—source data 1. [file elife-84330-fig8-figsupp1-data1.xlsx]

## Sheet: volcano (21)
	FC	log2(FC)	raw.pval	#NAME?
Lztr1	3.7321	1.9	0.079875	1.0976
Adprhl1	3.0233	1.5961	0.069695	1.1568
Gpr113; Adgrf3	2.9904	1.5803	0.062679	1.2029
Rnf213	2.646	1.4038	0.060974	1.2149
1500032L24Rik; Smdt1	2.5013	1.3227	0.093734	1.0281
Uap1l1	2.4105	1.2693	0.0095633	2.0194
Atp7b	2.2748	1.1857	0.097576	1.0107
Cox4i2	2.0482	1.0343	0.0040034	2.3976
Wdr75	1.8539	0.89055	0.042786	1.3687
Mpz	1.7485	0.80611	0.0078545	2.1049
Mbp	1.7142	0.77751	0.003375	2.4717
Eif1	1.6844	0.75223	0.082811	1.0819
Xpnpep1	1.6705	0.74027	0.021041	1.6769
Prx	1.6236	0.69916	0.0044888	2.3479
Pet100	1.5994	0.67756	0.00016851	3.7734
Ipo7	1.5593	0.64088	0.057812	1.238
COX3	1.5569	0.63867	0.081245	1.0902
Taf4b	1.5532	0.63527	0.0050418	2.2974
Pmp2	1.5134	0.59784	0.00077861	3.1087
Suclg2	1.4752	0.56096	0.00049999	3.301
Atg13	1.4713	0.55712	0.069581	1.1575
Nnt	1.4585	0.54444	0.071653	1.1448
Fxn	1.454	0.54002	0.0099459	2.0024
Cd9	1.4378	0.5239	0.010237	1.9898
Pnpla7	1.4333	0.51937	0.02776	1.5566
Fmod	1.4313	0.51734	0.025067	1.6009
Stxbp6	1.4307	0.51675	0.0047525	2.3231
Echdc1	1.4265	0.51247	4.0912e-05	4.3881
Coa5	1.4262	0.51223	0.00070986	3.1488
2010107G23Rik	1.4219	0.50781	0.042821	1.3683
Pllp	1.4199	0.50578	0.049883	1.302
Grhpr	1.4158	0.50162	0.00039141	3.4074
Gls	1.4146	0.50043	9.1048e-05	4.0407
Mtrf1l	1.4131	0.49889	0.036508	1.4376
AI462493; Uqcc3	1.4096	0.49533	0.0054132	2.2665
Cygb	1.4041	0.48963	0.039166	1.4071
Nit2	1.4033	0.48879	0.00018299	3.7376
Ddah1	1.3897	0.4748	0.012131	1.9161
Pnkd	1.3886	0.47361	0.00031804	3.4975
Tars	1.3874	0.47243	0.00060962	3.2149
Lypla1	1.386	0.4709	0.00087546	3.0578
Cox7b	1.3835	0.46828	0.017584	1.7549
Akr1b10	1.3776	0.4622	0.0075007	2.1249
Tarsl2	1.3706	0.45476	4.8833e-05	4.3113
Pet112; Pet112l; Gatb	1.3577	0.44116	0.0039805	2.4001
Atp5a1 B	1.3565	0.43989	0.0018227	2.7393
Cul9	1.3559	0.4393	0.048683	1.3126
Cryz	1.3554	0.43871	0.0017472	2.7577
Hdhd2 B	1.3538	0.43703	0.00094897	3.0227
Ptpn3	1.3505	0.43349	0.0071737	2.1443
Efha1; Micu2	1.3503	0.43324	5.4161e-05	4.2663
Mrps36	1.3477	0.43045	0.0073686	2.1326
Cbl	1.3469	0.42961	0.004087	2.3886
Mtfp1	1.3463	0.42902	0.0021786	2.6618
Tfb2m	1.3463	0.42902	0.003746	2.4264
Lars	1.3451	0.42775	0.00023593	3.6272
Jam3	1.3329	0.41453	0.043976	1.3568
Akt1s1	1.3321	0.41369	0.038454	1.4151
Eif4a1	1.3315	0.4131	0.015496	1.8098
COX1	1.3315	0.4131	0.02048	1.6887
Epb41	1.3299	0.41134	0.045587	1.3412
Eprs	1.3283	0.40957	0.00011027	3.9575
Cox7c; Gm12338; LOC100048613; LOC102642884	1.3272	0.40839	0.010211	1.9909
Cadm4	1.3261	0.40721	0.012363	1.9079
2900026A02Rik	1.3253	0.40637	0.018352	1.7363
Sdhd	1.324	0.40486	0.049032	1.3095
Ccdc58	1.3237	0.40452	0.0014137	2.8496
Nqo1	1.3237	0.40452	0.018098	1.7424
Aifm2	1.3218	0.40251	0.020273	1.6931
Dars	1.3204	0.40099	0.00012276	3.911
Aimp1	1.3172	0.39747	4.8787e-05	4.3117
Slc25a13	1.3167	0.39688	0.006437	2.1913
Ndufa4	1.3137	0.3936	0.013712	1.8629
Gpt2	1.3108	0.39049	5.1038e-05	4.2921
Lipt1	1.3102	0.38982	0.0040606	2.3914
Acadl	1.3101	0.38965	0.062599	1.2034
Lyrm7	1.3068	0.38604	0.022693	1.6441
Cox7a2l	1.3055	0.38461	0.0068453	2.1646
Cox6c	1.305	0.38403	0.0051776	2.2859
Atp5e	1.3033	0.38219	0.0049879	2.3021
Mpc1	1.3004	0.37892	0.034999	1.4559
Dnpep	1.2997	0.37815	0.012898	1.8895
Ndufaf1	1.2983	0.37665	0.00018847	3.7248
Tmem143	1.2976	0.37581	0.00062486	3.2042
Csl	1.2976	0.37581	0.0076662	2.1154
Cox4i1	1.2967	0.37489	0.0061351	2.2122
Zfp473	1.2931	0.37078	0.0093645	2.0285
COX2	1.2928	0.37052	0.005736	2.2414
Atp5a1	1.2928	0.37052	0.0096745	2.0144
Mrpl33	1.292	0.36961	0.024393	1.6127
Acot2	1.2907	0.36818	0.088764	1.0518
Apool	1.2886	0.36583	0.0032931	2.4824
Parl	1.2881	0.36525	0.001119	2.9512
Prodh	1.2876	0.36466	0.015363	1.8135
Chchd7	1.2873	0.36433	0.00037679	3.4239
Alas1	1.2865	0.36349	0.0098165	2.008
Epb4.1l2; Epb41l2	1.2862	0.36308	0.013619	1.8659
Pdk2	1.2857	0.36257	0.0018504	2.7327
Uqcrq	1.2852	0.36198	0.0079567	2.0993
Atp5b	1.2852	0.36198	0.01105	1.9566
Cox18	1.2842	0.36088	0.03515	1.4541
2810006K23Rik	1.2841	0.36081	0.071162	1.1477
Serac1	1.2828	0.35931	0.00086035	3.0653
Slc13a3	1.2828	0.35931	0.016993	1.7697
Atp5h	1.2824	0.3588	0.011951	1.9226
Pdpr	1.2815	0.35788	0.00020672	3.6846
Cox7a1	1.2805	0.35671	0.004818	2.3171
2810405K02Rik; Fam213b	1.2789	0.35495	0.0054993	2.2597
Atp5d	1.2789	0.35495	0.017508	1.7568
Cox5a	1.2758	0.35144	0.0064729	2.1889
Fahd2a	1.2753	0.35085	0.0072315	2.1408
0610012G03Rik	1.2746	0.35001	0.0013993	2.8541
Pusl1	1.2746	0.35001	0.014955	1.8252
Hadh	1.2743	0.34968	0.037116	1.4304
Atg4d	1.274	0.34935	0.023257	1.6334
Atp5c1	1.272	0.34708	0.017048	1.7683
Nudt13	1.2707	0.34558	0.0042538	2.3712
Prdx5	1.2694	0.34415	0.0285	1.5452
Decr1	1.2693	0.34401	0.077107	1.1129
Cycs; Gm10053	1.2688	0.3435	0.0055454	2.2561
Ndufaf2	1.2684	0.34298	0.0042133	2.3754
Mtx2	1.2684	0.34298	0.017389	1.7597
Nmnat3	1.2678	0.34233	0.0040781	2.3895
Slirp	1.2673	0.34174	0.0023328	2.6321
Cox6a2	1.2665	0.3409	0.0045694	2.3401
Aldh5a1	1.2663	0.34057	0.0059448	2.2259
Panx1	1.2652	0.3394	0.090889	1.0415
Me3	1.265	0.33914	0.0014831	2.8288
Cpt2	1.265	0.33914	0.067392	1.1714
Abhd11	1.2648	0.33889	0.0036146	2.4419
Suclg1	1.264	0.33804	0.0044228	2.3543
Uqcrh	1.264	0.33797	0.011031	1.9574
Il15ra	1.263	0.3368	0.090445	1.0436
Gfpt1	1.2622	0.33596	0.013746	1.8618
Pdp1	1.2619	0.33563	0.00098898	3.0048
Dhrs4	1.2619	0.33563	0.012745	1.8946
Gstz1	1.2614	0.33505	0.0083046	2.0807
Aimp2	1.2607	0.33421	0.007952	2.0995
Cox7a2	1.2599	0.33329	0.0035011	2.4558
Cox6b1	1.2594	0.33271	0.016263	1.7888
Olfr658	1.2586	0.33187	0.071747	1.1442
Pitpnm1	1.2586	0.3318	0.010059	1.9975
Sod2	1.2576	0.33063	0.023851	1.6225
Uqcrb	1.2571	0.33011	0.018156	1.741
Cbr1	1.2563	0.3292	0.0026023	2.5846
Atp5j2	1.2553	0.32803	0.016983	1.77
Uqcrc1	1.2545	0.32712	0.0060817	2.216
Acp6	1.2523	0.32453	0.00050765	3.2944
Atp5s	1.2515	0.32362	0.0025482	2.5938
G6pc3	1.2512	0.32336	0.031718	1.4987
Tmem186	1.251	0.32303	0.00039926	3.3987
Opa3	1.2505	0.32245	0.012243	1.9121
Uqcrfs1	1.2497	0.3216	0.0081571	2.0885
Atp5l	1.2497	0.3216	0.02443	1.6121
Zadh2	1.2482	0.31985	0.0010173	2.9925
Glod4	1.2479	0.31953	0.009797	2.0089
Atp5j	1.2479	0.31953	0.067536	1.1705
Mdh2	1.2472	0.31868	0.026713	1.5733
Tmem160	1.2467	0.3181	7.2117e-05	4.142
Nfs1	1.2467	0.3181	0.0046766	2.3301
Them4	1.2467	0.3181	0.0083081	2.0805
Etfdh	1.2457	0.31699	0.06892	1.1617
Serhl	1.2457	0.31693	0.01867	1.7289
9030617O03Rik; Dglucy	1.2411	0.31167	0.0075442	2.1224
Idh3a	1.2404	0.31083	0.0094318	2.0254
Usmg5; LOC100504912; LOC102642507	1.2404	0.31083	0.029649	1.528
Uqcrc2	1.2386	0.30876	0.0085144	2.0698
Cad	1.2386	0.30876	0.019216	1.7163
Gpx4	1.2384	0.30849	0.0083255	2.0796
Prdm16	1.2379	0.30785	0.0073863	2.1316
Ppa2	1.2367	0.30648	0.0086443	2.0633
Pccb	1.2361	0.30584	0.0044923	2.3475
Ndufb11	1.2361	0.30584	0.020182	1.695
1110001A16Rik; Cebpzos	1.2346	0.30409	0.022658	1.6448
Pmpca	1.2326	0.30175	0.0024509	2.6107
Dld	1.2326	0.30175	0.011084	1.9553
Sumf1	1.2326	0.30175	0.065548	1.1834
Aco2	1.2322	0.30123	0.018573	1.7311
Rars	1.2319	0.30091	0.0031372	2.5035
Cs	1.2316	0.30053	0.0089642	2.0475
Ankrd24	1.2314	0.30032	0.042277	1.3739
Lactb2	1.2311	0.3	0.039664	1.4016
Elovl1	1.2309	0.29968	0.039063	1.4082
Lace1; Afg1l	1.2304	0.29916	0.0093627	2.0286
Mcee	1.2304	0.29916	0.019104	1.7189
Sucla2	1.2304	0.2991	0.014731	1.8318
Snapin	1.2297	0.29825	0.010649	1.9727
Sdhb	1.2297	0.29825	0.015052	1.8224
1110058L19Rik; Sdhaf4	1.2284	0.29676	0.018504	1.7327
Cox5b	1.2282	0.2965	0.041631	1.3806
Cuta	1.2279	0.29624	0.0044745	2.3493
Clgn	1.2277	0.29592	0.030909	1.5099
Nt5m	1.2269	0.29502	0.0096188	2.0169
Plbd1	1.2269	0.29502	0.013467	1.8707
Kars	1.2264	0.29443	0.00094762	3.0234
Ogdhl	1.2264	0.29443	0.093379	1.0298
Nudt8	1.2259	0.29385	0.042097	1.3758
Pcca	1.2257	0.29359	0.0050999	2.2924
Ppif	1.2255	0.29333	0.04073	1.3901
D10Jhu81e; LOC100046684; LOC102641949	1.2254	0.29327	0.025826	1.5879
Mrpl34	1.225	0.29274	0.02509	1.6005
Oxnad1	1.2247	0.29242	0.011862	1.9258
Idh3b	1.2241	0.29178	0.018675	1.7287
2310061C15Rik; Cmc2	1.2237	0.29126	0.0077753	2.1093
Ndufs5; BC002163; LOC100504968; LOC102641315	1.2224	0.28977	0.060637	1.2173
Mrrf	1.222	0.28919	0.0028	2.5528
Ndufb5	1.2218	0.28898	0.011607	1.9353
Hagh	1.2217	0.28892	0.0084443	2.0734
1810063B05Rik; Coa6	1.2215	0.2886	0.01074	1.969
Tanc2	1.2213	0.2884	0.089358	1.0489
Ptpmt1	1.221	0.28808	0.00071824	3.1437
Fars2	1.221	0.28802	0.003357	2.4741
Zfp956	1.2207	0.28776	0.07421	1.1295
Park7	1.2205	0.2875	0.00022187	3.6539
Pnpla8	1.2202	0.28718	0.0067088	2.1734
2310047M10Rik; Borcs6	1.2202	0.28718	0.012449	1.9049
Tst	1.22	0.28691	0.011783	1.9287
Ndufc2; LOC102641347	1.2198	0.28665	0.008588	2.0661
Ndufa1	1.2195	0.28627	0.039023	1.4087
Letm1	1.219	0.28575	0.07431	1.129
Acsf3	1.2183	0.28484	0.015089	1.8213
Atp5o; LOC100047429; LOC102641678	1.2183	0.28484	0.041945	1.3773
Impdh2	1.2183	0.28484	0.048835	1.3113
Ado	1.2181	0.28458	0.0061252	2.2129
Nadk2; Nadkd1	1.218	0.28452	0.00048692	3.3125
Abcb7	1.2168	0.2831	0.001188	2.9252
Iars2	1.2168	0.28304	0.0068895	2.1618
Sdha	1.2165	0.28278	0.017942	1.7461
Uqcr10	1.2163	0.28251	0.0082429	2.0839
Ecsit	1.2161	0.28225	0.00033548	3.4743
Lyrm4	1.2156	0.28167	0.0040114	2.3967
Hibch	1.2156	0.28161	0.0072572	2.1392
1110007C09Rik; Card19	1.2153	0.28129	0.01204	1.9194
Chchd3	1.2148	0.28071	0.024938	1.6031
C030006K11Rik	1.2126	0.27812	0.0031408	2.503
Pigy; Pyurf	1.2123	0.2778	0.019509	1.7098
Lrpprc	1.2119	0.27727	0.00451	2.3458
Nudt2	1.2119	0.27727	0.013591	1.8667
Gfm1	1.209	0.27378	0.0067103	2.1733
1110008L16Rik	1.2085	0.27319	0.0024379	2.613
Pdk1	1.2085	0.27319	0.010854	1.9644
Mtfmt	1.2082	0.27288	0.027181	1.5657
4930595D18Rik	1.2075	0.27203	0.093187	1.0306
Synj2bp; Gm20498; Synj2bp-cox16	1.2072	0.27171	0.072875	1.1374
Atad3a	1.207	0.27145	0.0044332	2.3533
Clec2d	1.2068	0.27118	0.0019511	2.7097
Ak3	1.2065	0.27087	0.0019126	2.7184
Vat1l	1.2065	0.27087	0.023459	1.6297
Dnajc11	1.2063	0.2706	0.005969	2.2241
Atp5k	1.2063	0.2706	0.091884	1.0368
Ccdc109a; Mcu	1.2053	0.26938	0.00088564	3.0527
Ogdh	1.2053	0.26938	0.013778	1.8608
Dlat	1.2039	0.26769	0.035629	1.4482
Mrs2	1.2036	0.26737	0.00087754	3.0567
Clybl	1.2033	0.26705	0.005982	2.2232
Tbrg4	1.2029	0.26653	0.0020641	2.6853
Gdi1	1.2024	0.26589	0.093185	1.0307
Ndufs4	1.2022	0.26563	0.079155	1.1015
Timm9	1.2019	0.26536	0.0025132	2.5998
Gnao1	1.2019	0.26531	0.082651	1.0828
Fech	1.2014	0.26473	0.016001	1.7959
Tufm	1.2014	0.26473	0.017672	1.7527
Ndufv1	1.2007	0.26388	0.013625	1.8657
Ndufa6	1.2007	0.26388	0.023161	1.6352
Ndufs7	1.2005	0.26362	0.016874	1.7728
Myl12b	0.83333	-0.26303	0.019412	1.7119
Als2	0.83303	-0.26356	0.0020393	2.6905
Map2k4	0.83236	-0.26473	0.060548	1.2179
Pls3	0.83217	-0.26504	0.039478	1.4036
Sepp1; Selenop	0.8315	-0.26621	0.090276	1.0444
Anxa5	0.83135	-0.26647	0.011675	1.9327
Rpl3	0.83034	-0.26822	0.073808	1.1319
Nudc	0.83016	-0.26854	0.0039029	2.4086
Lum	0.82964	-0.26944	0.045473	1.3422
Apoe	0.82949	-0.2697	0.061211	1.2132
Adh1	0.82815	-0.27203	0.014749	1.8312
Serpinc1	0.82749	-0.27319	0.04745	1.3238
Vat1	0.82682	-0.27436	0.028973	1.538
Lrrc30	0.82664	-0.27468	0.03936	1.4049
Mcpt4	0.826	-0.27579	0.0047771	2.3208
S100a10	0.82548	-0.27669	0.024752	1.6064
Alpk3	0.8253	-0.27701	0.02727	1.5643
Add3	0.82479	-0.27791	0.083374	1.079
Crip1	0.82334	-0.28045	0.0099387	2.0027
Hspb6	0.82315	-0.28077	0.083329	1.0792
Anxa11	0.82267	-0.28161	0.0050455	2.2971
Capzb	0.82249	-0.28193	0.03569	1.4475
Capn2	0.82183	-0.2831	0.0051713	2.2864
Ank1	0.82083	-0.28484	0.026866	1.5708
Mylk2	0.81999	-0.28633	0.071486	1.1458
Nfia	0.81947	-0.28723	0.026552	1.5759
Ahsg	0.81855	-0.28887	0.015964	1.7969
Flna	0.81836	-0.28919	0.003238	2.4897
Aspn	0.81803	-0.28977	0.025647	1.591
Capns1	0.81752	-0.29067	0.0034924	2.4569
Sec24d	0.81704	-0.29152	0.01695	1.7708
Tmem120a	0.81554	-0.29417	0.054427	1.2642
Mylk	0.81455	-0.29592	0.058973	1.2293
Eef1a2	0.81371	-0.29741	0.091946	1.0365
Hnrnpm	0.81324	-0.29825	0.014765	1.8308
Capza2	0.81306	-0.29857	0.023075	1.6369
Tcea3	0.81291	-0.29884	0.062134	1.2067
Neb	0.81225	-0.3	0.09001	1.0457
Paics	0.81207	-0.30032	0.0031842	2.497
Coro6	0.81192	-0.30059	0.025011	1.6019
Anxa2	0.81112	-0.30201	0.044813	1.3486
Apoa1	0.81028	-0.3035	0.021574	1.6661
Fau	0.81028	-0.3035	0.058114	1.2357
Lgmn	0.80995	-0.30409	0.069283	1.1594
Dpm3	0.80963	-0.30467	0.029386	1.5319
2700060E02Rik; Rtraf	0.80933	-0.30519	0.020627	1.6856
Arhgdib	0.8093	-0.30525	0.037027	1.4315
Hspa1a; Hspa1b	0.80766	-0.30817	0.014906	1.8266
Aldh9a1	0.80734	-0.30876	0.0067324	2.1718
Angptl2	0.80636	-0.31051	0.052626	1.2788
Anxa6	0.80458	-0.31369	0.0011002	2.9585
Mif	0.80328	-0.31602	0.0034706	2.4596
Acsl4	0.80083	-0.32043	0.0017065	2.7679
Myl6	0.80036	-0.32128	0.0031427	2.5027
Gstm2	0.79773	-0.32602	0.016316	1.7874
Slc25a31	0.79644	-0.32836	0.0097016	2.0132
Ccdc155	0.79644	-0.32836	0.023579	1.6275
Actn3	0.7963	-0.32862	0.080391	1.0948
Ostc	0.79612	-0.32894	0.039436	1.4041
Cct4	0.79565	-0.32979	0.0050271	2.2987
H3f3a; H3f3b	0.79358	-0.33355	0.069702	1.1568
Ddx1	0.79354	-0.33362	0.020724	1.6835
Nsfl1c	0.79244	-0.33563	0.0091469	2.0387
S100a6	0.79147	-0.33739	0.017525	1.7563
Gstm1	0.79129	-0.33772	0.0029462	2.5307
Pgd	0.79129	-0.33772	0.014591	1.8359
Anxa1	0.79019	-0.33973	0.074782	1.1262
Gm20431	0.78603	-0.34734	0.055834	1.2531
Mypn	0.78536	-0.34858	0.058054	1.2362
D10Wsu52e; Rtcb	0.78398	-0.35111	0.020415	1.6901
Pdcl3	0.78249	-0.35385	0.085259	1.0693
Aspscr1	0.78221	-0.35437	0.0092366	2.0345
Ube2n	0.78176	-0.35521	0.0051118	2.2914
Ptma	0.78158	-0.35554	0.017995	1.7449
Actr3	0.7809	-0.35678	0.0050269	2.2987
Itm2a	0.78063	-0.3573	0.020464	1.689
Fxr2	0.77764	-0.36283	0.019194	1.7168
Kng2	0.77592	-0.36601	0.032528	1.4877
Srsf1	0.77458	-0.36851	0.003561	2.4484
Asph C	0.77242	-0.37254	0.050715	1.2949
Pex11c; Pex11g	0.77197	-0.37338	0.0061064	2.2142
Tmem167	0.77183	-0.37364	0.019284	1.7148
Mybpc2	0.7713	-0.37463	0.060452	1.2186
Skil	0.76835	-0.38017	0.080388	1.0948
F13a1	0.76727	-0.38219	0.0077489	2.1108
Prpsap2	0.76727	-0.38219	0.017045	1.7684
Coro1c	0.76692	-0.38285	0.0017921	2.7466
Dcun1d1	0.76674	-0.38318	0.015524	1.809
Clta	0.76491	-0.38663	0.05991	1.2225
Tbca	0.76411	-0.38814	0.0030919	2.5098
Ube2d1	0.76367	-0.38898	0.025583	1.592
Tpm1 B	0.75826	-0.39923	0.052468	1.2801
Ppp1r12b	0.75346	-0.40839	0.040634	1.3911
Inmt	0.74996	-0.41512	0.010922	1.9617
Tmsb15a	0.74795	-0.41899	0.032036	1.4944
Gm17087	0.74625	-0.42228	0.073679	1.1327
Myoz1	0.74581	-0.42312	0.025603	1.5917
Tpm2	0.74485	-0.42497	0.082541	1.0833
Tnnt3	0.74203	-0.43045	0.062653	1.2031
Pdlim3	0.73986	-0.43467	0.094265	1.0256
Srsf4	0.7381	-0.43812	0.0095152	2.0216
Tpm1	0.73641	-0.44141	0.038232	1.4176
H2-Ke2; Pfdn6	0.73628	-0.44166	0.086327	1.0639
Cpa3	0.73624	-0.44175	0.098852	1.005
Banf1	0.73581	-0.4426	0.0071387	2.1464
Fkbp8	0.73293	-0.44825	0.0079871	2.0976
Arhgap1	0.7319	-0.45028	0.018857	1.7245
H2afv	0.72533	-0.46329	0.065054	1.1867
Hpx	0.72384	-0.46626	0.088106	1.055
Lmna	0.72367	-0.4666	0.034171	1.4663
Hba-a1; Hba-a2	0.72312	-0.46769	0.065257	1.1854
0610040J01Rik	0.71898	-0.47599	0.026789	1.572
Hbb-b1; Beta-s; Hbb-bs; Hbb-bt	0.7188	-0.47633	0.093608	1.0287
Tnni2	0.71821	-0.47752	0.046678	1.3309
Myot	0.71792	-0.47811	0.094463	1.0247
Nucb2	0.71657	-0.48083	0.028756	1.5413
Myh1	0.71392	-0.48617	0.06534	1.1848
Beta-s; Hbb-bs; Hbb-bt; Hbb-b1	0.7124	-0.48924	0.056538	1.2477
Vcp	0.71069	-0.4927	0.00044356	3.353
Gatc	0.70138	-0.51174	0.0023828	2.6229
Faf1	0.69382	-0.52737	0.04798	1.3189
Ldb3	0.69114	-0.53296	0.040222	1.3955
Mybpc1	0.68554	-0.54469	0.030377	1.5175
Hist2h2ac	0.68475	-0.54635	0.039386	1.4047
Mylpf	0.68028	-0.55581	0.017661	1.753
Myl1	0.68011	-0.55617	0.013803	1.86
Rtca; Rtcd1	0.67661	-0.5636	0.093741	1.0281
Myo18a	0.67179	-0.57391	0.0034315	2.4645
Apobec2	0.66628	-0.5858	0.0050363	2.2979
Sub1	0.66528	-0.58797	0.0017905	2.747
Mybph	0.66262	-0.59375	0.02555	1.5926
Myh4	0.66251	-0.59399	0.004791	2.3196
Snx9	0.64902	-0.62367	0.0042764	2.3689
Ankfy1	0.64079	-0.64207	0.010063	1.9973
Slc25a4	0.64074	-0.6422	0.0013018	2.8855
Hp	0.59831	-0.74105	0.021149	1.6747
Ube2o	0.59423	-0.75091	0.023477	1.6294
Myo9b	0.59337	-0.75299	0.001303	2.885
Fam98b	0.58328	-0.77774	6.1164e-05	4.2135
Ankrd2	0.57573	-0.79654	0.067999	1.1675
