# Supplementary material for: Mitochondrial protein import clogging as a mechanism of disease
Source: eLife. 2023 May 2;12:e84330. doi: 10.7554/eLife.84330 (PMC10208645; doi:10.7554/eLife.84330)
Supplement: Figure 8—figure supplement 2—source data 1. [file elife-84330-fig8-figsupp2-data1.xlsx]

## Sheet: Sheet1
Gene symbol	P-value (KI vs WT)	Q-value (KI vs WT)	Ratio (KI vs WT)	Fold change (KI vs WT)	LSMean(KI) (KI vs WT)	LSMean(WT) (KI vs WT)	P-value (GT)	Q-value (GT)
Depp1	8e-09	1.63e-05	3.44	3.44	357	104	7.98e-09	1.62e-05
Pdk4	1.41e-07	0.000155	2.83	2.83	18700	6610	1.41e-07	0.000155
Arrdc2	6.75e-08	9.61e-05	2.73	2.73	2840	1040	6.73e-08	9.59e-05
Fam107a	2.41e-08	4.3e-05	2.18	2.18	103	47.5	2.41e-08	4.28e-05
Slc10a6	9.26e-06	0.00573	2.13	2.13	72.9	34.2	9.25e-06	0.00573
Mcf2l	4.79e-11	2.28e-07	2.11	2.11	474	225	4.77e-11	2.26e-07
Ucp3	9.74e-08	0.00012	1.92	1.92	3680	1920	9.72e-08	0.00012
Map3k6	1.01e-07	0.00012	1.8	1.8	215	120	1.01e-07	0.00012
Rsc1a1	6.78e-07	0.000536	1.7	1.7	380	224	6.77e-07	0.000536
Fas	2.12e-05	0.0101	1.7	1.7	141	82.9	2.12e-05	0.0101
Plet1os	8.95e-05	0.0336	1.68	1.68	115	68.9	8.95e-05	0.0335
Plin4	2.54e-09	6.03e-06	1.65	1.65	8460	5130	2.53e-09	6.01e-06
Per1	3.68e-05	0.0164	1.57	1.57	1210	768	3.68e-05	0.0164
Ppp1r1a	1.58e-07	0.000161	1.53	1.53	1270	832	1.58e-07	0.00016
Tinagl1	7.29e-05	0.0297	1.48	1.48	664	448	7.28e-05	0.0296
Sesn1	5.49e-07	0.000489	1.44	1.44	752	522	5.48e-07	0.000488
Mgat4a	8.58e-05	0.033	1.44	1.44	182	126	8.57e-05	0.033
S1pr1	5.19e-07	0.000489	1.42	1.42	972	682	5.18e-07	0.000488
6820431F20Rik	1.1e-05	0.00619	1.41	1.41	815	577	1.1e-05	0.00619
Tmem140	1.21e-05	0.00637	1.35	1.35	1420	1050	1.21e-05	0.00636
Pim3	5.89e-07	0.000494	1.34	1.34	615	461	5.88e-07	0.000493
Glul	1.1e-05	0.00619	1.34	1.34	8380	6250	1.1e-05	0.00619
Slc20a2	2.12e-05	0.0101	1.34	1.34	1600	1190	2.12e-05	0.0101
Selenbp1	7.93e-05	0.0314	1.33	1.33	572	429	7.93e-05	0.0314
Bcl2l1	8.15e-06	0.00528	1.29	1.29	451	349	8.15e-06	0.00527
Ipo13	3.81e-06	0.00272	1.13	1.13	5890	5200	3.81e-06	0.00271
Tbx15	9.61e-05	0.0351	0.832	-1.2	6700	8060	9.61e-05	0.0351
B3galnt2	0.000138	0.0477	0.833	-1.2	2730	3270	0.000138	0.0477
Kif3c	0.000144	0.0477	0.786	-1.27	1240	1580	0.000144	0.0477
Smtnl2	2.31e-09	6.03e-06	0.775	-1.29	7340	9470	2.3e-09	6.01e-06
Mylk4	1.13e-05	0.00619	0.769	-1.3	24700	32100	1.13e-05	0.00619
Cdk19	0.000131	0.0467	0.744	-1.34	900	1210	0.000131	0.0467
St3gal1	0.000143	0.0477	0.732	-1.37	527	720	0.000143	0.0477
Igfbp5	4.45e-05	0.0192	0.691	-1.45	17100	24700	4.44e-05	0.0192
Cbr2	1.35e-09	4.81e-06	0.687	-1.46	786	1140	1.35e-09	4.79e-06
Myod1	2.4e-05	0.011	0.64	-1.56	406	635	2.4e-05	0.011
Slc25a4	3.48e-17	4.96e-13	0.632	-1.58	49300	78000	3.43e-17	4.89e-13
Mettl21c	5.68e-05	0.0238	0.62	-1.61	912	1470	5.67e-05	0.0238
Sbk2	4.11e-08	6.51e-05	0.604	-1.66	870	1440	4.1e-08	6.5e-05
Smox	1.91e-06	0.00143	0.604	-1.66	3550	5880	1.9e-06	0.00143
Scd2	1.31e-12	9.33e-09	0.53	-1.89	521	982	1.3e-12	9.27e-09
Aldoc	1.66e-05	0.00844	0.114	-8.75	6.38	55.9	1.66e-05	0.00843
Slc1a2	4.39e-06	0.00298	0.0739	-13.5	3.63	49.1	4.38e-06	0.00297
