# Supplementary figures and images for: Mitochondrial protein import clogging as a mechanism of disease
Source: eLife journal article supplement (doi:10.7554/elife.84330), 2023-05-02

40 kDa

35 kDa

Cropped area for Figure 6F GAPDH

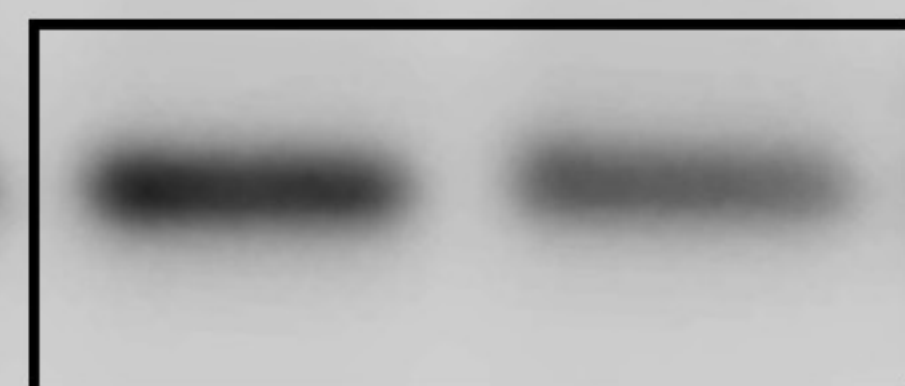

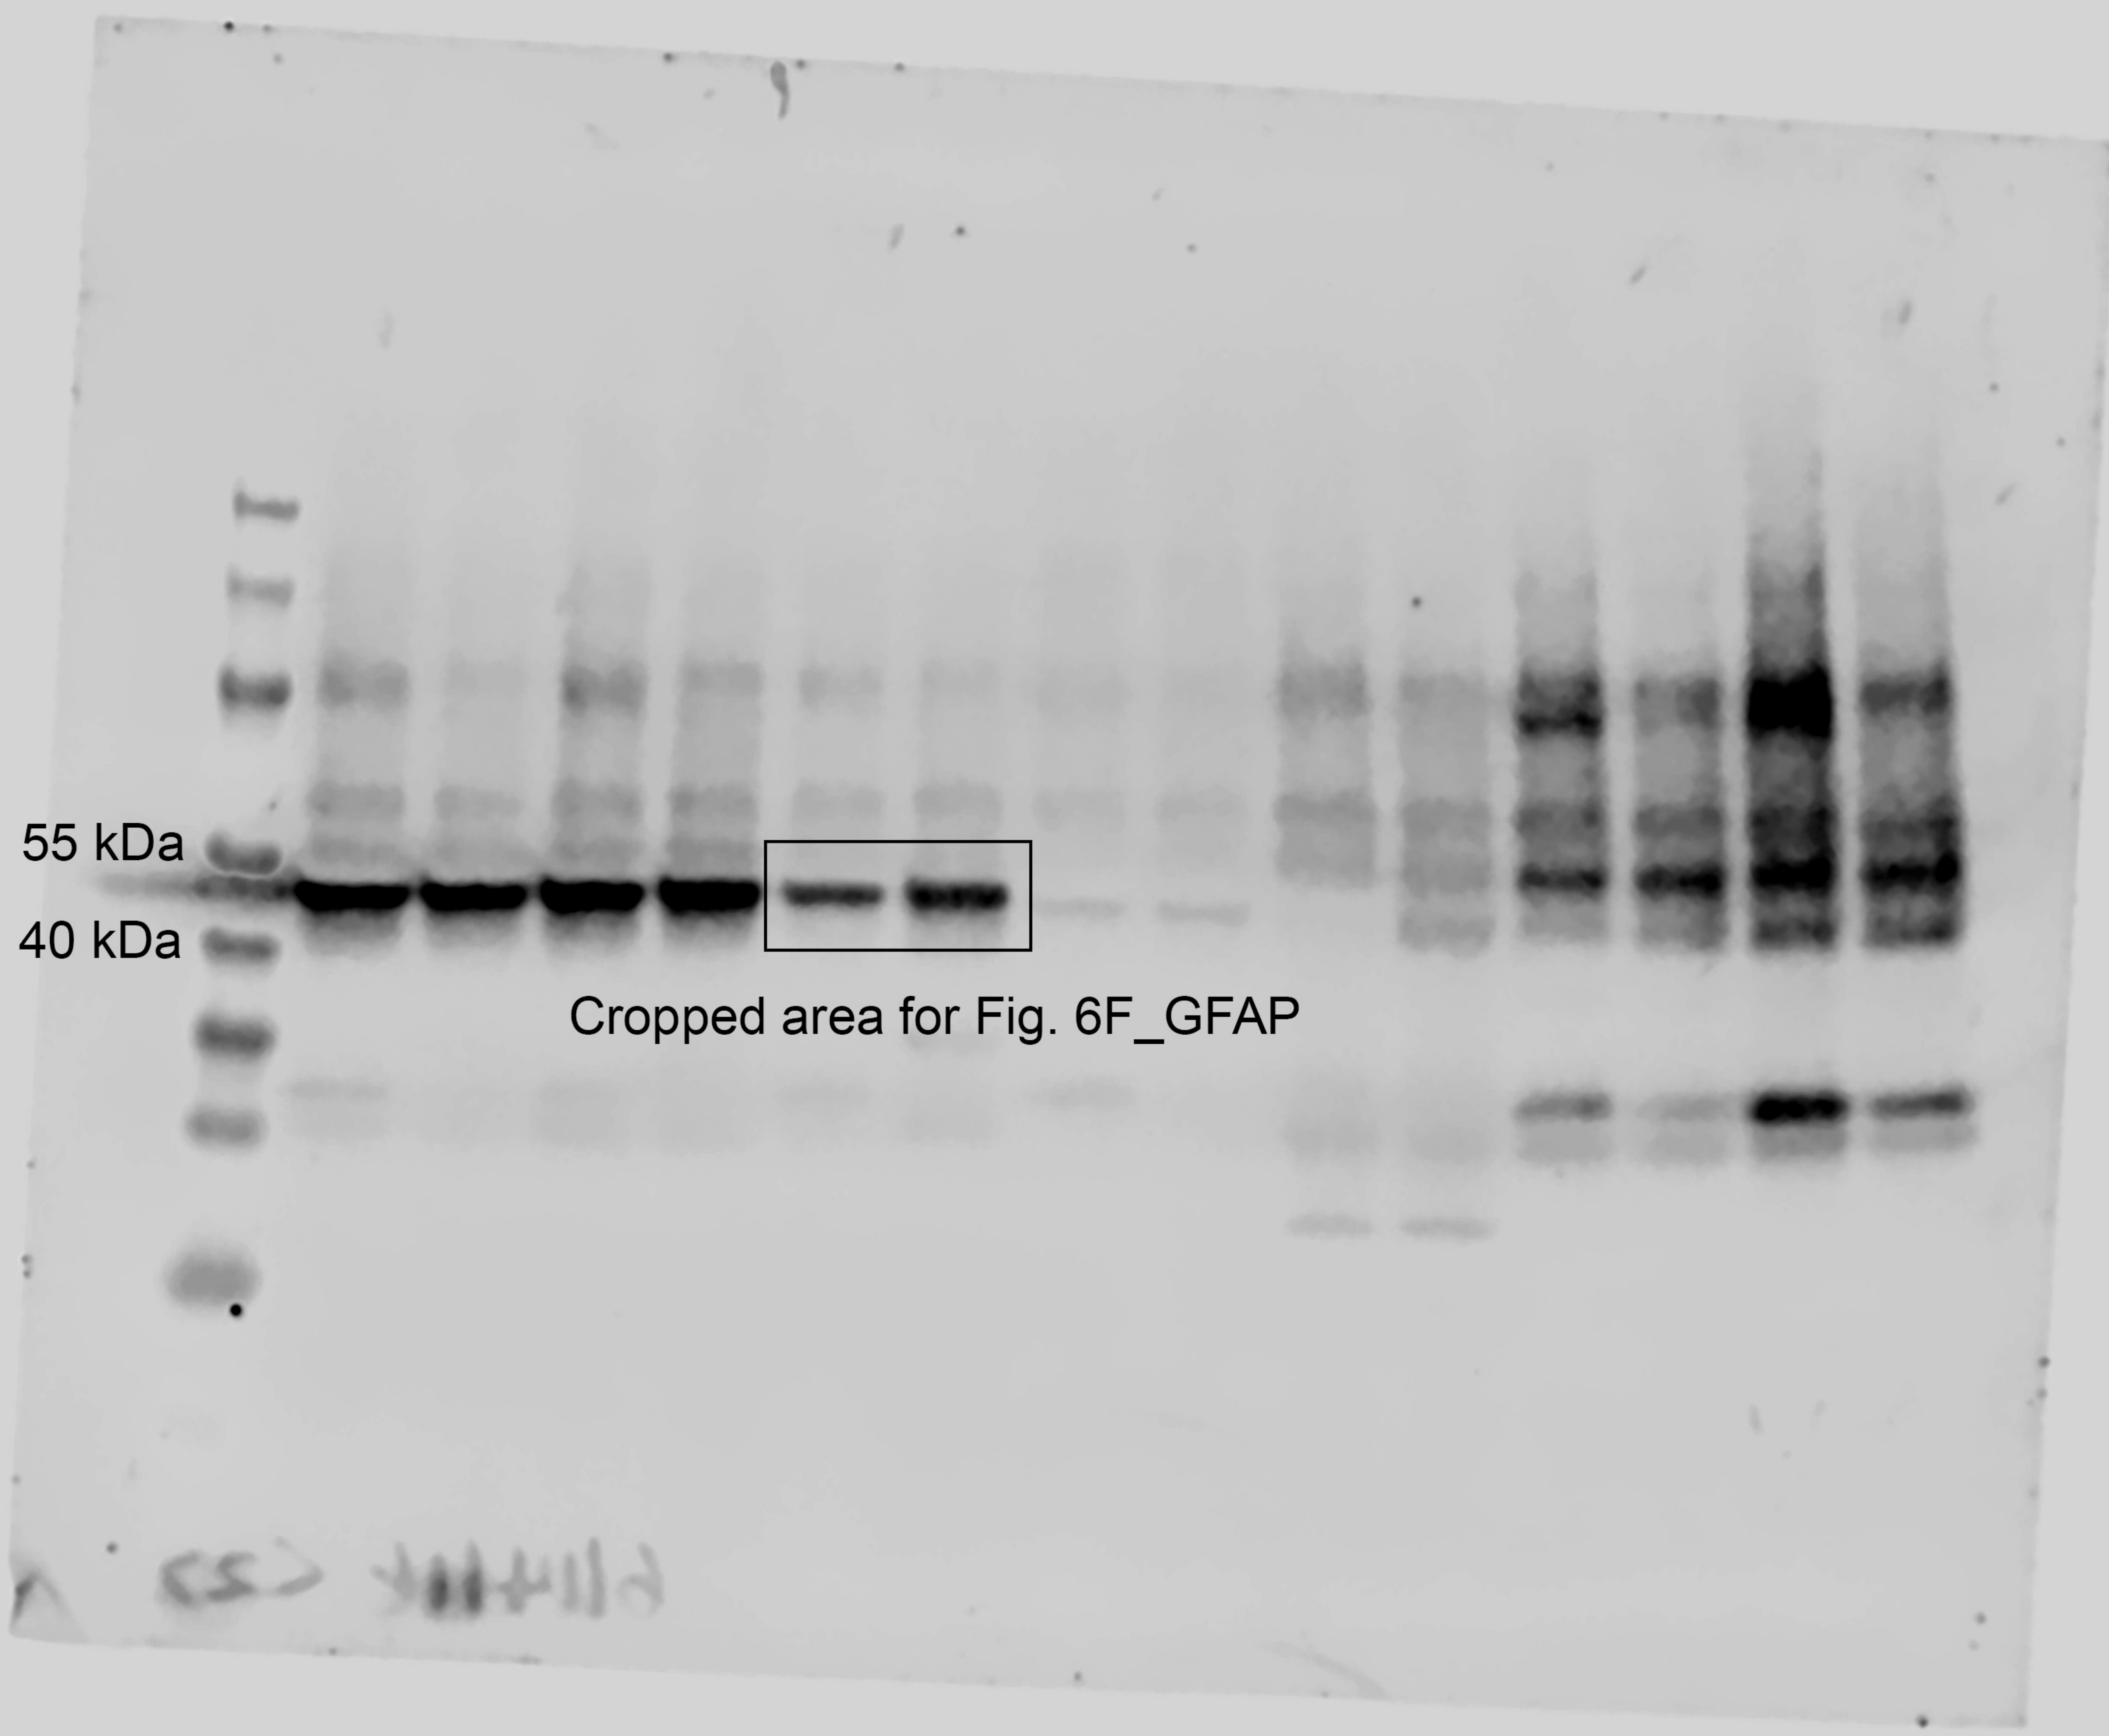

Supplement: fig6-data1 [file elife-84330-fig6-data1-v2.zip]
